# Supplementary material for: Efficient synthesis of benzene-fused 6/7-membered amides via Xphos Pd G2 catalyzed intramolecular C–N bond formation
Source: Royal Society of Chemistry journal article supplement (doi:10.1039/c7ra09160e), 2017-01-01

## Efficient synthesis of benzene-fused 6/7-membered amides via intramolecular C-N bond formation

Xu Zhou<sup>1,2,\*</sup>, Li Ke<sup>2</sup>, Zhai Rongliang<sup>1,2</sup>, Liang Ting<sup>1,2</sup>, Gui Xiaodie<sup>2</sup>, Zhang Rongli<sup>1</sup>

<sup>1</sup>Department of Chemistry, Xuzhou Medical University, Xuzhou 221004, China

<sup>2</sup>Jiangsu Key Laboratory of New Drug Research and Clinical Pharmacy, Xuzhou Medical University,

Xuzhou 221004, China

# *Supporting Information*

## Table of Contents

- I. General data S2
- II. Synthesis and Characterization of Substrates S2-S6
- III. General procedure for the synthesis of benzene-fused 6/7-membered amides S7-S11
- IV. References S11
- V. <sup>1</sup>H and <sup>13</sup>C NMR spectra of the synthetic compounds S11-S99
- VI. HPLC spectra of the 2g and chiral 2g S99-S102
- VII. Representative HRMS spectra of substrates and products (1a, 2a, 1j, 2j) S 103-S106

## I. General data

Commercially available reagents were used without further purification. The solvents used for experiment research were all through pretreatment on condition of anaerobic and without water. Reactions were monitored by thin layer chromatography (TLC) using Silicycle precoated silica gel plates. Flash column chromatography was performed over Silicycle silica gel (300-400 mesh).  $^1\text{H}$  NMR and  $^{13}\text{C}$  NMR spectra were recorded on JMTC-400/54/SS 400 MHz spectrometers using residue solvent peaks as internal standards ( $\text{CHCl}_3$ ,  $^1\text{H}$ : 7.26 ppm;  $^{13}\text{C}$ : 77.00 ppm). Infrared spectra were recorded with a PerkinElmer Spectrum Two FT-IR spectrometer and are reported in reciprocal centimeter ( $\text{cm}^{-1}$ ). Mass spectra were recorded with MicroTof-II using electron spray ionization (MeOH as solvent) or Waters GCT Premier time-of-flight mass spectrometer with a field ionization (FI) ion source.

## II. Synthesis and Characterization of Substrates

### 1. Synthesis of 2-(2-chlorophenoxy)acetamide Derivatives

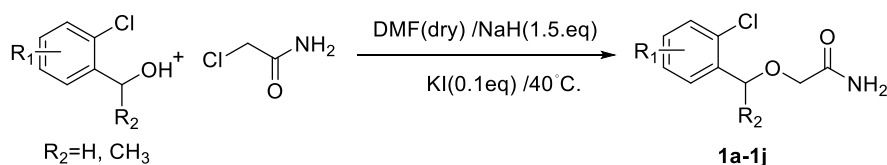

NaH (7.5 mmol, 0.3 g) was added to Schlenk tube. The mixture was stirred and anhydrous DMF (2 mL) was added under argon. 2-Chlorobenzyl alcohol (4.5 mmol, 0.634 g) was dissolved in dry DMF (2 mL) which was slowly added to the Schlenk tube under ice-cooling and stirred for 1.5 h. Chloroacetamide (0.3 mmol, 0.1 equiv.) was dissolved in dry DMF (1.5 mL) and was slowly dropped into the reaction flask at room temperature and stirred for another 5 h. After the reaction was finished, water was added to destroy the excess NaH and the solution was extracted by ethyl acetate (50 mL X 3). The organic phases were combined and dried by sodium sulfate and was then concentrated. The residue was purified by flash chromatography on silica gel (eluent: hexanes/ethyl acetate 5/1) to afford the desired product. The yield was 35% -60%.

#### 2-((2-chlorobenzyl)oxy)acetylchloride **1a**

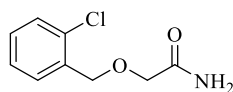

**1a**

56% yield, m.p. 92-93 °C;  $^1\text{H}$  NMR (400 MHz,  $\text{CDCl}_3$ ):  $\delta$  ppm 4.06 (s, 2H), 4.69 (s, 2H), 5.66 (s, 1H), 6.59 (s, 1H), 7.27-7.30 (m, 2H), 7.39-7.43 (m, 2H);  $^{13}\text{C}$  NMR (100 MHz,  $\text{CDCl}_3$ ):  $\delta$  ppm 69.7, 70.8, 127.0, 129.5, 129.7, 133.5, 134.4, 172.1; IR  $\nu$  ( $\text{cm}^{-1}$ ): 3373.4, 3151.4, 1653.5, 1455.1, 1105.6; HRMS calcd for  $\text{C}_9\text{H}_9\text{ClNO}_2$  ( $\text{M}+\text{Na}$ ) $^+$  222.0289, found 222.0285.

#### 2-((2-chloro-4-methylbenzyl)oxy)acetylchloride (**1b**)

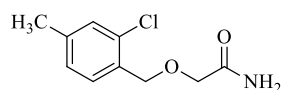

**1b**

60% yield, m.p. 109-110 °C;  $^1\text{H}$  NMR (400 MHz,  $\text{CDCl}_3$ ):  $\delta$  ppm 2.33 (s, 3H), 4.02 (s, 2H), 4.63 (s, 2H), 6.03 (s, 1H), 6.60

(s, 1H), 7.08 (d,  $J = 7.2$  Hz, 1H), 7.21 (s, 1H), 7.25 (d,  $J = 8.4$  Hz, 1H);  $^{13}\text{C}$  NMR (100 MHz,  $\text{CDCl}_3$ ):  $\delta$  ppm 20.9, 69.4, 70.7, 127.7, 129.8, 130.1, 131.2, 133.4, 140.0, 172.5; IR  $\nu$  ( $\text{cm}^{-1}$ ): 3460.8, 3172.0, 2911.7, 1700.6, 1582.1; HRMS calcd for  $\text{C}_{10}\text{H}_{12}\text{ClNO}_2$  ( $\text{M}+\text{Na}$ ) $^+$  236.0454, found 236.0453.

**2-((2-chloro-4-fluorobenzyl)oxy)acetamide (1c)**

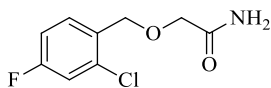

**1c**

45% yield, m.p.151~152 °C;  $^1\text{H}$  NMR (400 MHz,  $\text{CDCl}_3$ ):  $\delta$  ppm 4.11 (s, 2H), 4.69 (s, 2H), 6.58 (s, 2H), 7.03 (dt,  $J^1 = 8.4$  Hz,  $J^2 = 2.4$  Hz, 1H), 7.14 (dd,  $J^1 = 8.4$  Hz,  $J^2 = 2.4$  Hz, 1H), 7.37-7.40 (m, 1H);  $^{13}\text{C}$  NMR (100 MHz,  $\text{CDCl}_3$ ):  $\delta$  ppm 69.5, 70.2, 114.2 (d,  $J = 21.1$  Hz), 117.1 (d,  $J = 24.0$  Hz), 130.5 (d,  $J = 3.8$  Hz), 130.9 (d,  $J = 8.6$  Hz), 134.4 (d,  $J = 10.5$  Hz), 162.4 (d,  $J = 249.2$  Hz), 172.8;  $^{19}\text{F}$  NMR:  $\delta$  ppm: -111.3; IR  $\nu$  ( $\text{cm}^{-1}$ ): 3376.9, 3182.7, 1655.9, 1122.9, 810.8; HRMS calcd for  $\text{C}_9\text{H}_9\text{ClFNO}_2$  ( $\text{M}+\text{Na}$ ) $^+$  240.0204, found 240.0228.

**2-((2-chloro-5-(trifluoromethyl)benzyl)oxy)acetamide (1d)**

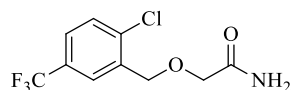

**1d**

48% yield;  $^1\text{H}$  NMR (400 MHz,  $\text{CDCl}_3$ ):  $\delta$  ppm 4.10 (s, 2H), 4.72 (s, 2H), 6.11 (s, 1H), 6.54 (s, 1H), 7.51-7.56 (m, 2H), 7.71 (s, 1H);  $^{13}\text{C}$  NMR (100 MHz,  $\text{CDCl}_3$ ):  $\delta$  ppm 70.0, 70.1, 123.6 (q,  $J = 271.2$  Hz), 125.9 (q,  $J = 3.8$  Hz), 126.1 (q,  $J = 3.9$  Hz), 129.5 (q,  $J = 32.6$  Hz), 130.1, 135.7, 136.7, 171.8;  $^{19}\text{F}$  NMR:  $\delta$  ppm -62.4; IR  $\nu$  ( $\text{cm}^{-1}$ ): 3459.1, 3151.4, 1699.0, 1253.5, 810.9; HRMS calcd for  $\text{C}_{10}\text{H}_9\text{ClF}_3\text{NO}_2$  ( $\text{M}+\text{Na}$ ) $^+$  290.0172, found 290.0168.

**2-((2-chloro-4-trifluoromethyl)benzyl)oxy)acetamide (1e)**

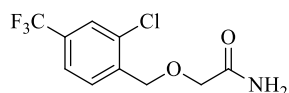

**1e**

35% yield, m.p.105~106 °C;  $^1\text{H}$  NMR (400 MHz,  $\text{CDCl}_3$ ):  $\delta$  ppm 4.19 (s, 2H), 4.73 (s, 2H), 6.02 (s, 2H), 7.50 (d,  $J = 8.0$  Hz, 1H), 7.62 (d,  $J = 8.0$  Hz, 2H);  $^{13}\text{C}$  NMR (100 MHz,  $\text{CDCl}_3$ ):  $\delta$  ppm 67.9, 69.8, 123.2 (q,  $J = 271.2$  Hz), 123.8 (q,  $J = 2.8$  Hz), 126.3 (q,  $J = 3.8$  Hz), 129.0, 131.4 (q,  $J = 33.5$  Hz), 133.0, 138.8, 174.5;  $^{19}\text{F}$  NMR:  $\delta$  ppm -62.7; IR  $\nu$  ( $\text{cm}^{-1}$ ): 3459.1, 3151.4, 1699.0, 1253.5, 810.9; HRMS calcd for  $\text{C}_{10}\text{H}_9\text{ClF}_3\text{NO}_2$  ( $\text{M}+\text{Na}$ ) $^+$  290.0172, found 290.0174.

**2-((2-chloro-3,4-dimethoxybenzyl)oxy)acetamide (1f)**

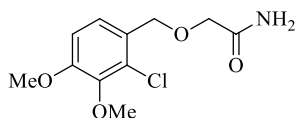

**1f**

56% yield, m.p.126~127 °C;  $^1\text{H}$  NMR (400 MHz,  $\text{CDCl}_3$ ):  $\delta$  ppm 3.87 (s, 3H), 3.89 (s, 3H), 4.02 (s, 2H), 4.62 (s, 2H), 5.58 (s, 1H), 6.58 (s, 1H), 6.83 (d,  $J = 8.0$  Hz, 1H), 7.10 (d,  $J = 8.0$  Hz, 1H);  $^{13}\text{C}$  NMR (100 MHz,  $\text{CDCl}_3$ ):  $\delta$  ppm 56.1, 60.7, 69.4, 71.0, 110.2, 125.2, 127.2, 128.5, 145.7, 153.9, 172.2; IR  $\nu$  ( $\text{cm}^{-1}$ ): 3355.5, 3172.8, 2905.3, 1651.9, 1583.8; HRMS

calcd for  $C_{10}H_{14}ClNO_4$  ( $M+Na$ )<sup>+</sup> 282.0518, found 282.0518.

**2-(1-(2-chlorophenyl)ethoxy)acetamide (1g)**

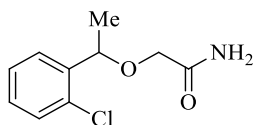

**1g**

50% yield, m.p. 141~142 °C; <sup>1</sup>H NMR (400 MHz, CDCl<sub>3</sub>): δ ppm 1.48 (d, *J* = 6.4 Hz, 3H), 3.85 (s, 2H), 4.95 (q, *J* = 6.4 Hz, 1H), 6.42 (s, 1H), 6.63 (s, 1H), 7.22 (t, *J* = 7.6 Hz, 1H), 7.27-7.35 (m, 2H), 7.43 (dd, *J*<sup>1</sup> = 7.6 Hz, *J*<sup>2</sup> = 1.2 Hz, 1H); <sup>13</sup>C NMR (100 MHz, CDCl<sub>3</sub>): δ ppm 22.2, 68.0, 75.1, 126.4, 127.4, 128.8, 129.6, 132.4, 139.6, 172.7; IR ν (cm<sup>-1</sup>): 3340.2, 3161.5, 1651.1, 1455.9, 1422.1; HRMS calcd for  $C_{10}H_{12}ClNO_2$  ( $M + Na$ )<sup>+</sup> 236.0454, found 236.0446.

**2-((2-bromo-6-chlorobenzyl)oxy)acetamide (1h)**

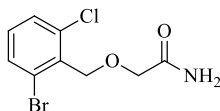

**1h**

49% yield, m.p. 151~160 °C; <sup>1</sup>H NMR (400 MHz, CDCl<sub>3</sub>): δ ppm 4.08 (s, 2H), 4.90 (s, 2H), 5.49 (s, 1H), 6.59 (s, 1H), 7.16 (t, *J* = 8.4 Hz, 1H), 7.39 (dd, *J*<sup>1</sup> = 8.0 Hz, *J*<sup>2</sup> = 1.2 Hz, 1H), 7.53 (dd, *J*<sup>1</sup> = 8.4 Hz, *J*<sup>2</sup> = 0.8 Hz, 1H); <sup>13</sup>C NMR (100 MHz, CDCl<sub>3</sub>): δ ppm 69.5, 70.2, 126.8, 129.2, 130.9, 131.9, 133.5, 136.6, 172.0; IR ν (cm<sup>-1</sup>): 3371.9, 3184.1, 1634.2, 1576.4, 1342.8; HRMS calcd for  $C_9H_9BrClNO_4$  ( $M+Na$ )<sup>+</sup> 301.9382, found 301.9374.

**2-(1-(2-chloropyridin-3-yl)ethoxy)acetamide (1i)**

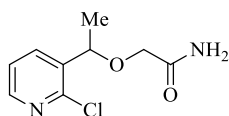

**1i**

40% yield, m.p. 139~140 °C; <sup>1</sup>H NMR (400 MHz, CDCl<sub>3</sub>): δ ppm 1.51 (d, *J* = 6.4 Hz, 3H), 3.88 (d, *J* = 5.6 Hz, 2H), 4.90 (q, *J* = 6.4 Hz, 1H), 5.93 (s, 1H), 6.57 (s, 1H), 7.30 (dd, *J*<sup>1</sup> = 7.6 Hz, *J*<sup>2</sup> = 4.8 Hz, 1H), 7.78 (dd, *J*<sup>1</sup> = 7.6 Hz, *J*<sup>2</sup> = 2.0 Hz, 1H), 8.35 (dd, *J*<sup>1</sup> = 7.8 Hz, *J*<sup>2</sup> = 2.0 Hz, 1H); <sup>13</sup>C NMR (100 MHz, CDCl<sub>3</sub>): δ ppm 22.0, 68.2, 75.0, 123.2, 135.5, 136.4, 148.9, 149.4, 171.8; IR ν (cm<sup>-1</sup>): 3478.0, 3193.0, 2926.9, 1658.2, 1580.2; HRMS calcd for  $C_9H_{11}ClN_2O_2$  ( $M+Na$ )<sup>+</sup> 237.0407, found 237.0398.

**2-((2-chloro-7-methylquinolin-3-yl)methoxy)acetamide (1j)**

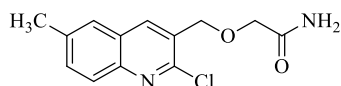

**1j**

42% yield, m.p. 171~172 °C; <sup>1</sup>H NMR (400 MHz, CDCl<sub>3</sub>): δ ppm 2.55 (s, 3H), 4.16 (s, 2H), 4.81 (s, 2H), 5.63 (s, 1H), 6.59 (s, 1H), 7.59 (dd, *J*<sup>1</sup> = 10.4 Hz, *J*<sup>2</sup> = 2.0 Hz, 2H), 7.92 (d, *J* = 8.4 Hz, 1H), 8.10 (s, 1H); <sup>13</sup>C NMR (100 MHz, CDCl<sub>3</sub>): δ ppm 21.6, 70.1, 70.5, 126.4, 127.1, 128.0, 128.5, 133.0, 136.9, 137.6, 145.9, 148.5, 171.6; IR ν (cm<sup>-1</sup>): 3473.9, 1717.7, 1329.9, 1119.8; HRMS calcd for  $C_{13}H_{13}ClNO_2$  ( $M+Na$ )<sup>+</sup> 287.0563, found 287.0573.

## 2. Synthesis of 2-((2-chlorophenyl)oxy)acetyl chloride Derivatives

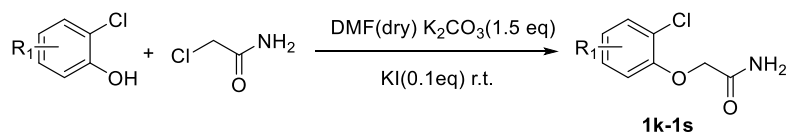

2-Chlorophenol (5 mmol),  $K_2CO_3$  (7.5 mmol, 1.5 equiv.), chloroacetamide (5 mmol, 1.0 equiv.), KI (0.5 mmol, 0.1 equiv.) was added to a flask. The mixture was stirred at room temperature for 4 h to 5 h. After the reaction was finished, the mixture was added with water and extracted with ethyl acetate. The product was purified by column chromatography (ethyl acetate : petroleum ether = 1 : 4). The product was white flaky crystals with 80% -95% yields.

### 2-((2-chlorophenoxy)acetamide (1k)

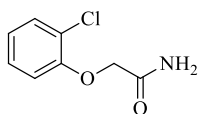

**1k**

95% yield, m.p. 152-152.5 °C;  $^1H$  NMR (400 MHz,  $CDCl_3$ ):  $\delta$  ppm 4.54 (s, 2H), 6.02 (s, 1H), 6.84 (s, 1H), 6.91 (dd,  $J^1 = 8.0$  Hz,  $J^2 = 1.6$  Hz, 1H), 6.99 (dt,  $J^1 = 8.0$  Hz,  $J^2 = 1.6$  Hz, 1H), 7.28-7.24 (m, 1H), 7.40 (dd,  $J^1 = 8.0$  Hz,  $J^2 = 1.6$  Hz, 1H);  $^{13}C$  NMR (100 MHz,  $CDCl_3$ ):  $\delta$  ppm 67.6, 113.7, 122.8(0), 122.8(4), 128.1, 130.4, 152.6, 170.3; IR  $\nu$  ( $cm^{-1}$ ): 3458.6, 3143.6, 1638.1, 1580.9; HRMS calcd for  $C_8H_8ClNO_2$  ( $M+Na$ ) $^+$ , 208.0141, found 208.0150.

### 2-((2-chlorophenoxy)propanamide (1l)

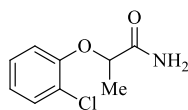

**1l**

80% yield, m.p. 142-142.5 °C;  $^1H$  NMR (400 MHz,  $CDCl_3$ ):  $\delta$  ppm 1.64 (d,  $J = 6.4$  Hz, 3H), 4.72 (q,  $J = 6.4$  Hz, 1H), 6.19 (s, 1H), 6.76 (s, 1H), 6.92-6.99 (m, 2H), 7.23 (dt,  $J^1 = 8.0$  Hz,  $J^2 = 1.6$  Hz, 1H), 7.40 (dd,  $J^1 = 8.0$  Hz,  $J^2 = 1.6$  Hz, 1H);  $^{13}C$  NMR (100 MHz,  $CDCl_3$ ):  $\delta$  ppm 18.3, 75.8, 114.9, 122.8, 123.5, 128.0, 130.5, 152.3, 174.4; IR  $\nu$  ( $cm^{-1}$ ): 3379.3, 3169.0, 1632.5, 1422.6, 1238.9; HRMS calcd for  $C_9H_{10}ClNO_2$  ( $M+Na$ ) $^+$  222.0289, found 222.0280.

### 2-((2-chlorophenyl)thio)acetamide (1m)

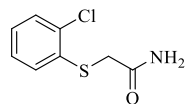

**1m**

88% yield, m.p. 120-120.5 °C;  $^1H$  NMR (400 MHz  $CDCl_3$ ):  $\delta$  ppm 3.67 (s, 2H), 5.58 (s, 1H), 6.67 (s, 1H), 7.15-7.19 (m, 1H), 7.23-7.26 (m, 2H), 7.38-7.41 (m, 1H);  $^{13}C$  NMR (100 MHz,  $CDCl_3$ ):  $\delta$  ppm 35.8, 127.3, 127.4, 127.7, 129.9, 132.8, 133.8, 170.0; IR  $\nu$  ( $cm^{-1}$ ): 3425.6, 3178.6, 1678.5, 1634.6, 1452.8; HRMS calcd for  $C_8H_8ClNOS$  ( $M+Na$ ) $^+$  223.9913, found 223.9923.

### 2-((2-bromophenyl)thio)propanamide (1n)

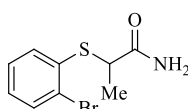

**1n**

86% yield, m.p.169~170 °C;  $^1\text{H}$  NMR (400 MHz  $\text{CDCl}_3$ ):  $\delta$  ppm 1.64 (d,  $J = 7.2$  Hz, 3H), 3.87 (q,  $J = 7.2$  Hz, 1H), 5.44 (s, 1H), 6.53 (s, 1H), 7.07-7.11 (m, 1H), 7.26-7.30 (m, 2H), 7.57 (d,  $J = 8.4$  Hz, 1H);  $^{13}\text{C}$  NMR (100 MHz,  $\text{CDCl}_3$ ):  $\delta$  ppm 18.0, 45.8, 123.9, 127.9, 128.3, 129.5, 133.2, 135.6, 174.2; IR  $\nu$  ( $\text{cm}^{-1}$ ): 3384.2, 3187.2, 1623.7, 1448.1, 738.2; HRMS calcd for  $\text{C}_{10}\text{H}_{12}\text{ClNO}_2$  ( $\text{M}+\text{Na}$ ) $^+$  281.9564, found 281.9548.

**2-(2-chloro-5-methylphenoxy)acetamide (1o)**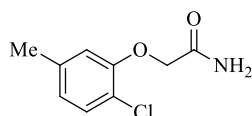**1o**

93% yield, m.p.119-120 °C;  $^1\text{H}$  NMR (400 MHz,  $\text{CDCl}_3$ ):  $\delta$  ppm 2.29 (s, 3H), 4.50 (s, 2H), 5.96 (s, 1H), 6.79-6.81 (m, 2H), 7.02 (d,  $J = 8.8$  Hz, 1H), 7.21 (d,  $J = 8.0$  Hz, 1H);  $^{13}\text{C}$  NMR (100 MHz,  $\text{CDCl}_3$ ):  $\delta$  ppm 20.3, 68.1, 113.8, 122.5, 128.5, 130.9, 132.8, 150.6, 170.5; IR  $\nu$  ( $\text{cm}^{-1}$ ): 3470.9, 3158.3, 2921.5, 1705.3, 1592.7; HRMS calcd for  $\text{C}_9\text{H}_{10}\text{ClNO}_2$  ( $\text{M}+\text{Na}$ ) $^+$  222.0289, found 222.0292.

**2-(2-chloro-4-methylphenoxy)acetamide (1p)**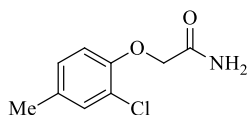**1p**

95% yield, m.p. 138-139 °C;  $^1\text{H}$  NMR (400 MHz,  $\text{CDCl}_3$ ):  $\delta$  ppm 2.28 (s, 3H), 4.50 (s, 2H), 5.69 (s, 1H), 6.78-6.80 (m, 2H), 7.02 (dd,  $J^1 = 7.4$  Hz,  $J^2 = 4.4$  Hz, 1H), 7.21 (s, 1H);  $^{13}\text{C}$  NMR (100 MHz,  $\text{CDCl}_3$ ):  $\delta$  ppm 20.3, 68.1, 113.9, 122.5, 128.4, 130.9, 132.8, 150.6, 170.7; IR  $\nu$  ( $\text{cm}^{-1}$ ): 3459.1, 3151.4, 1699.0, 1504.4, 1253.5; HRMS calcd for  $\text{C}_9\text{H}_{10}\text{ClNO}_2$  ( $\text{M}+\text{Na}$ ) $^+$  222.0298, found 222.0287.

**2-(2-chloro-5-methoxyphenoxy)acetamide 1q**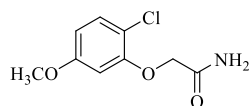**1q**

92% yield, m.p.126-126.5 °C;  $^1\text{H}$  NMR (400 MHz,  $\text{CDCl}_3$ ):  $\delta$  ppm 3.77 (s, 3H), 4.48 (s, 2H), 5.89 (s, 1H), 6.76-6.87 (m, 3H), 6.96-6.97 (m, 1H);  $^{13}\text{C}$  NMR (100 MHz,  $\text{CDCl}_3$ ):  $\delta$  ppm 55.9, 68.8, 113.1, 115.3, 116.1, 123.7, 147.0, 155.0, 170.6; IR  $\nu$  ( $\text{cm}^{-1}$ ): 3466.9, 3145.9, 1694.9, 1273.2; HRMS calcd for  $\text{C}_9\text{H}_{10}\text{ClNO}_3$  ( $\text{M} + \text{Na}$ ) $^+$  238.0247, found 238.0269.

**2-((1-chloronaphthalen-2-yl)oxy)acetamide (1r)**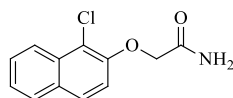**1r**

94% yield, m.p.184-184.5 °C;  $^1\text{H}$  NMR (400 MHz,  $\text{CDCl}_3$ ):  $\delta$  ppm 4.67 (s, 2H), 6.15 (s, 1H), 6.99 (s, 1H), 7.22 (d,  $J = 8.8$  Hz, 1H), 7.46 (t,  $J = 7.6$  Hz, 1H), 7.61 (t,  $J = 7.6$  Hz, 1H), 7.81 (t,  $J = 9.6$  Hz, 2H), 8.21 (d,  $J = 8.8$  Hz, 1H);  $^{13}\text{C}$  NMR (100 MHz,  $\text{CDCl}_3$ ):  $\delta$  ppm 68.7, 114.7, 123.6, 125.1, 127.8, 128.1, 128.5, 130.1, 150.3, 170.5; IR  $\nu$  ( $\text{cm}^{-1}$ ): 3358.0, 3173.6,

1633.7, 1276.1; HRMS calcd for  $C_{12}H_{10}ClNO_2$  ( $M+Na$ )<sup>+</sup> 258.0298, found 258.0293.

### 2-((2-amino-6-chlorophenoxy)acetamide) (1s)

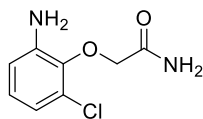

**1s**

72% yield, m.p. 120-120.5 °C; <sup>1</sup>H NMR (400 MHz, CDCl<sub>3</sub>): δ ppm 4.72 (s, 2H), 6.73 (d, *J* = 8.8 Hz, H), 6.87 (t, *J*<sup>1</sup> = 8 Hz, *J*<sup>2</sup> = 8.2 Hz, H), 7.07 (d, *J* = 6 Hz, H), 8.76 (s, H); <sup>13</sup>C NMR (100 MHz, CDCl<sub>3</sub>): δ ppm 67.4, 114.3, 122.3, 122.9, 125.1, 127.2, 139.9, 165.4; IR ν (cm<sup>-1</sup>): 3360.9, 3173.9, 1631.8 1108.4; HRMS calcd for  $C_8H_9ClN_2O_2$  ( $M+Na$ )<sup>+</sup> 223.0250, found 223.0264.

### 2-((2-chlorothiophen-3-yl)methoxy)acetamide (1t)

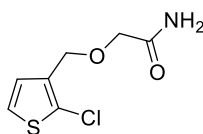

**1t**

51% yield, <sup>1</sup>H NMR (400 MHz, CDCl<sub>3</sub>): δ ppm 7.32 (d, *J* = 5.6 Hz, 1H), 6.94 (d, *J* = 5.4 Hz, 1H), 6.50 (s, 1H), 5.44 (s, 1H), 4.74 (s, 2H), 4.03 (s, 2H); <sup>13</sup>C NMR (100 MHz, CDCl<sub>3</sub>): δ ppm 171.8, 131.5, 127.9, 125.6, 125.1, 69.1, 65.0; IR ν (cm<sup>-1</sup>): 3362, 3178, 1633, 1111; HRMS calcd for  $C_7H_8ClNO_2S$  ( $M+Na$ )<sup>+</sup> 227.9862, found 227.9872.

## III. General procedure for the synthesis of benzene-fused 6/7-membered amides

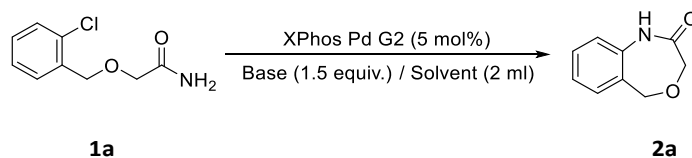

2-((2-chlorobenzyl)oxy)acetyl chloride (0.25 mmol), Cs<sub>2</sub>CO<sub>3</sub> (122.65 mg, 0.375 mmol) and Pd Xphos G2 (9.8 mg, 0.0125 mmol) were added into Schlenk tube. The mixture was stirred under argon and dry 1,4-dioxane (1 mL) was added and heated to 110 °C. The reaction was determined by TLC. After the reaction finished, the mixture was purified by column chromatography with yield of 85-99%.

### 3,5-dihydrobenzo[e][1,4]oxazepin-2(H)-one 2a<sup>[1]</sup>

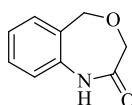

**2a**

99% yield, m.p. 156~157 °C; <sup>1</sup>H NMR (400 MHz, CDCl<sub>3</sub>): δ ppm 4.58 (s, 2H), 4.75 (s, 2H), 6.87 (d, *J* = 8.0 Hz, 1H), 7.06 (t, *J* = 7.6 Hz, 1H), 7.14 (d, *J* = 7.2 Hz, 1H), 7.26-7.27 (m, 1H), 7.72 (s, 1H); <sup>13</sup>C NMR (100 MHz, CDCl<sub>3</sub>): δ ppm 72.8, 73.5, 119.2, 123.7, 128.6, 128.7, 129.2, 135.7, 173.2; IR ν (cm<sup>-1</sup>): 3357.3, 3171.4, 1635.8, 1431.5, 1377.8; HRMS calcd for  $C_9H_9NO_2$  ( $M-H$ )<sup>+</sup> 162.0555, found 162.0559.

### 8-methyl-3,5-dihydrobenzo[e][1,4]oxazepin-2(H)-one 2b

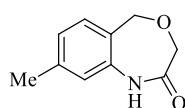

**2b**

96% yield, m.p. 154~155 °C; <sup>1</sup>H NMR (400 MHz, CDCl<sub>3</sub>): δ ppm 2.33 (s, 3H), 4.57 (s, 2H), 4.70 (s, 2H), 6.79 (s, 1H), 6.87 (d, *J* = 7.6 Hz, 1H), 7.02 (d, *J* = 7.6 Hz, 1H), 8.75 (s, 1H); <sup>13</sup>C NMR (100 MHz, CDCl<sub>3</sub>): δ ppm 21.0, 72.5, 73.3, 119.9, 124.5, 125.9, 128.4, 135.7, 139.3, 173.5; IR ν (cm<sup>-1</sup>): 3377.0, 3184.2, 2962.5, 1656.5, 1259.5; HRMS calcd for C<sub>10</sub>H<sub>11</sub>NO<sub>2</sub> (M+Na)<sup>+</sup> 200.0687, found 200.0673.

**8-fluoro-3,5-dihydrobenzo[e][1,4]oxazepin-2(H)-one 2c**

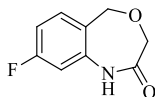

**2c**

94% yield, m.p. 166~167 °C; <sup>1</sup>H NMR (400 MHz, *d*<sup>6</sup>-DMSO): δ ppm 4.43 (s, 2H), 4.65 (s, 2H), 6.79 (dt, *J*<sup>1</sup> = 8.0 Hz, *J*<sup>2</sup> = 2.4 Hz, 1H), 6.92 (dd, *J*<sup>1</sup> = 10.4 Hz, *J*<sup>2</sup> = 2.4 Hz, 1H), 7.17 (d, *J* = 8.4 Hz, 1H), 10.30 (s, 1H); <sup>13</sup>C NMR (100 MHz, *d*<sup>6</sup>-DMSO): δ ppm 71.7, 73.8, 106.2 (d, *J* = 25.8 Hz), 109.4 (d, *J* = 21.1 Hz), 126.0 (d, *J* = 2.8 Hz), 130.6 (d, *J* = 9.6 Hz), 139.1 (d, *J* = 10.5 Hz), 162.3 (d, *J* = 41.4 Hz), 173.4; <sup>19</sup>F NMR: -113.9; IR ν (cm<sup>-1</sup>): 3194.0, 3066.2, 1661.0, 1603.5, 1372.5; HRMS calcd for C<sub>9</sub>H<sub>8</sub>FNO<sub>2</sub> (M+Na)<sup>+</sup> 204.0437, found 204.0430.

**7-(trifluoromethyl)-3,5-dihydrobenzo[e][1,4]oxazepin-2(H)-one 2d**

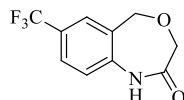

**2d**

90% yield, <sup>1</sup>H NMR (400 MHz, CDCl<sub>3</sub>): δ ppm 4.62 (s, 2H), 4.78 (s, 2H), 7.24-7.31 (m, 3H), 8.91 (s, 1H); <sup>13</sup>C NMR (100 MHz, CDCl<sub>3</sub>): δ ppm 70.1, 70.2, 123.9 (q, *J* = 3.9 Hz), 124.5 (q, *J* = 267.2 Hz), 126.2 (q, *J* = 3.9 Hz), 129.3, 131.8 (q, *J* = 32.6 Hz), 133.5, 138.6, 171.6; <sup>19</sup>F NMR: δ ppm -78.8; IR ν (cm<sup>-1</sup>): 2979.8, 1663.7, 1334.6, 1121.5; HRMS calcd for C<sub>10</sub>H<sub>8</sub>F<sub>3</sub>NO<sub>2</sub> (M-H)<sup>-</sup> 230.0427, found 230.0425.

**8-(trifluoromethyl)-3,5-dihydrobenzo[e][1,4]oxazepin-2(H)-one 2e**

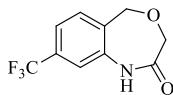

**2e**

92% yield, m.p. 128~129 °C; <sup>1</sup>H NMR (400 MHz, CDCl<sub>3</sub>): δ ppm 4.56 (s, 2H), 4.77 (s, 2H), 7.09 (d, *J* = 8.4 Hz, 1H), 7.37 (s, 1H), 7.53 (d, *J* = 8.4 Hz, 1H), 9.44 (s, 1H); <sup>13</sup>C NMR (100 MHz, CDCl<sub>3</sub>): δ ppm 72.9, 74.0, 119.6, 123.9 (q, *J* = 270.2 Hz), 125.7 (q, *J* = 32.6 Hz), 125.7 (q, *J* = 3.9 Hz), 126.4 (q, *J* = 3.9 Hz), 129.2, 138.9, 174.5; <sup>19</sup>F NMR: δ ppm -62.1; IR ν (cm<sup>-1</sup>): 2919.9, 1658.6, 1447.8, 1084.8, 656.7; HRMS calcd for C<sub>10</sub>H<sub>8</sub>F<sub>3</sub>NO<sub>2</sub> (M-H)<sup>-</sup> 230.0427, found 230.0429.

**8, 9-dimethoxy-3,5-dihydrobenzo[e][1,4]oxazepin-2(H)-one 2f**

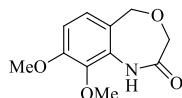

**2f**

90% yield, m.p. 148-149 °C; <sup>1</sup>H NMR (400 MHz, CDCl<sub>3</sub>): δ ppm 3.87 (s, 3H), 3.88 (s, 3H), 4.61 (s, 2H), 4.67 (s, 2H), 6.58 (d, *J* = 8.8 Hz, 1H), 6.78 (d, *J* = 8.8 Hz, 1H), 8.30 (s, 1H); <sup>13</sup>C NMR (100 MHz, CDCl<sub>3</sub>): δ ppm 55.9, 60.8, 72.9, 74.1, 106.6, 121.8, 122.8, 129.5, 136.8, 152.3, 172.4; IR ν (cm<sup>-1</sup>): 3195.3, 1661.6, 1391.6, 1112.3. HRMS calcd for C<sub>11</sub>H<sub>13</sub>NO<sub>4</sub> (M+Na)<sup>+</sup> 246.0742, found 246.0736.

**5-methyl-3,5-dihydrobenzo[e][1,4]oxazepin-2(H)-one 2g**

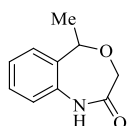



### 2g

89% yield, m.p. 120~121 °C; <sup>1</sup>H NMR (400 MHz, CDCl<sub>3</sub>): δ ppm 1.64 (d, *J* = 6.4 Hz, 3H), 4.54 (d, *J* = 2.4 Hz, 2H), 4.78 (q, *J* = 6.4 Hz, 1H), 6.99 (dd, *J*<sup>1</sup> = 8.4 Hz, *J*<sup>2</sup> = 0.4 Hz, 1H), 7.01 (td, *J*<sup>1</sup> = 7.6 Hz, *J*<sup>2</sup> = 0.4 Hz, 1H), 7.23-7.29 (m, 2H), 8.68 (s, 1H); <sup>13</sup>C NMR (100 MHz, CDCl<sub>3</sub>): δ ppm 19.0, 71.1, 75.2, 120.0, 123.9, 125.9, 128.8, 132.7, 136.0, 173.7; IR ν (cm<sup>-1</sup>): 3196.7, 3065.5, 2997.0, 2903.1, 1656.9; HRMS calcd for C<sub>10</sub>H<sub>11</sub>NO<sub>2</sub> (M-H)<sup>+</sup> 176.0721, found 176.0725. For corresponding chiral **R-2g**: -78° (c 0.08, Acetone), 83% ee (determined by a chiral AD-H column, <sup>i</sup>PrOH/Hexane = 10/90, t<sub>major</sub> = 14.26 min, t<sub>minor</sub> = 15.40 min).

### 6-chloro-3,5-dihydrobenzo[e][1,4]oxazepin-2(H)-one 2h

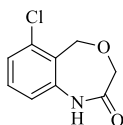

### 2h

83% yield, m.p. 172~173 °C; <sup>1</sup>H NMR (400 MHz, CDCl<sub>3</sub>): δ ppm 4.52 (s, 2H), 4.99 (s, 2H), 6.78 (d, *J* = 7.6 Hz, 1H), 7.11-7.19 (m, 2H), 7.70 (s, 1H); <sup>13</sup>C NMR (100 MHz, CDCl<sub>3</sub>): δ ppm 69.8, 73.1, 118.2, 124.9, 126.6, 129.2, 133.7, 137.5, 173.0; IR ν (cm<sup>-1</sup>): 3246.6, 2918.9, 1671.0, 1480.4, 1258.1; HRMS calcd for C<sub>9</sub>H<sub>8</sub>ClNO<sub>2</sub> (M+Na)<sup>+</sup> 220.0141, found 220.0143.

### 5-methyl-3,5-dihydropyrido[2,3-e][1,4]oxazepin-2(H)-one 2i

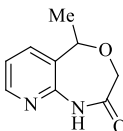

### 2i

89% yield, m.p. 106~106.5 °C; <sup>1</sup>H NMR (400 MHz, CDCl<sub>3</sub>): δ ppm 1.64 (d, *J* = 6.4 Hz, 3H), 4.64 (d, *J* = 6.0 Hz, 2H), 4.73 (q, *J* = 6.4 Hz, 1H), 7.04 (dd, *J*<sup>1</sup> = 7.6 Hz, *J*<sup>2</sup> = 4.8 Hz, 1H), 7.53 (d, *J* = 7.8 Hz, 1H), 8.40 (d, *J* = 4.8 Hz, 1H), 9.38 (s, 1H); <sup>13</sup>C NMR (100 MHz, CDCl<sub>3</sub>): δ ppm 18.9, 72.2, 75.0, 118.7, 127.4, 134.7, 147.6, 149.1, 173.0; IR ν (cm<sup>-1</sup>): 3180.4, 1662.7, 1634.3, 1401.8, 1315.7; HRMS calcd for C<sub>9</sub>H<sub>10</sub>N<sub>2</sub>O<sub>2</sub> (M+Na)<sup>+</sup> 201.0640, found 201.0623.

### 8-methyl-3,5-dihydro-[1,4]oxazepino[5,6-b]quinolin-2(H)-one 2j

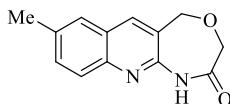

### 2j

85% yield, m.p. 134-135 °C; <sup>1</sup>H NMR (400 MHz, CDCl<sub>3</sub>): δ ppm 2.51 (s, 3H), 4.69 (s, 2H), 4.85 (s, 2H), 7.51 (d, *J* = 7.6 Hz, 2H), 7.77 (d, *J* = 8.4 Hz, 1H), 7.80 (s, 1H), 8.47 (s, 1H); <sup>13</sup>C NMR (100 MHz, CDCl<sub>3</sub>): δ ppm 21.5, 72.2, 74.3, 123.3, 125.0, 126.1, 127.2, 132.8, 135.7, 145.0, 147.6, 172.3; IR ν (cm<sup>-1</sup>): 2919.9, 1658.6, 1447.8, 1084.8, 656.7; HRMS calcd for C<sub>13</sub>H<sub>12</sub>N<sub>2</sub>O<sub>2</sub> (M-H)<sup>+</sup> 227.0821, found 227.0848.

### 2H-benzo[b][1,4]oxazin-3(4H)-one 2k<sup>[2-5]</sup>

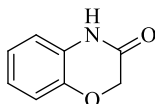

### 2k

Known compound, 99% yield; <sup>1</sup>H NMR (400 MHz, CDCl<sub>3</sub>): δ ppm 4.63 (s, 2H), 6.82-6.98 (m, 4H), 8.07 (s, 1H); <sup>13</sup>C NMR (100 MHz, CDCl<sub>3</sub>): δ ppm 67.2, 116.0, 116.8, 122.7, 124.3, 126.0, 143.6, 165.9.

### 2-methyl-2H-benzo[b][1,4]oxazin-3(4H)-one 2l<sup>[6]</sup>

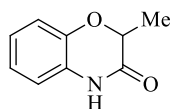

**2l**

Known compound, 97% yield;  $^1\text{H}$  NMR (400 MHz,  $\text{CDCl}_3$ ):  $\delta$  ppm 1.59 (d,  $J = 6.8$  Hz, 3H), 4.67 (q,  $J = 6.8$  Hz, 1H), 6.88-6.89 (m, 1H), 6.96-6.97 (m, 3H), 9.68 (s, 1H);  $^{13}\text{C}$  NMR (100 MHz,  $\text{CDCl}_3$ ):  $\delta$  ppm 16.2, 73.2, 115.9, 117.0, 122.6, 124.1, 126.4, 143.1, 168.9.

**2H-benzo[b][1,4]thiazin-3(4H)-one 2m**<sup>[7-8]</sup>

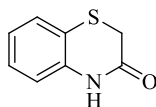

**2m**

Known compound, 99% yield;  $^1\text{H}$  NMR (400 MHz,  $\text{CDCl}_3$ ):  $\delta$  ppm 3.44 (s, 2H), 6.90 (d,  $J = 8.0$  Hz, 1H), 7.01 (dt,  $J^1 = 8.0$  Hz,  $J^2 = 1.2$  Hz, 1H), 7.17 (dt,  $J^1 = 7.6$  Hz,  $J^2 = 1.2$  Hz, 1H), 7.31 (d,  $J = 7.8$  Hz, 1H), 9.11 (s, 1H);  $^{13}\text{C}$  NMR (100 MHz,  $\text{CDCl}_3$ ):  $\delta$  ppm 29.9, 117.4, 119.9, 123.9, 127.2, 127.8, 136.3, 166.4;

**2-methyl-2H-benzo[b][1,4]thiazin-3(4H)-one 2n**<sup>[7-8]</sup>

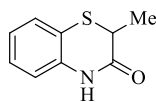

**2n**

Known compound, 98% yield;  $^1\text{H}$  NMR (400 MHz,  $\text{CDCl}_3$ ):  $\delta$  ppm 1.50 (d,  $J = 7.2$  Hz, 3H), 3.56 (q,  $J = 7.2$  Hz, 1H), 6.89 (d,  $J = 8.4$  Hz, 1H), 7.02 (t,  $J = 6.8$  Hz, 1H), 7.18 (t,  $J = 8.0$  Hz, 1H), 7.30-7.31 (m, 1H), 8.86 (s, 1H);  $^{13}\text{C}$  NMR (100 MHz,  $\text{CDCl}_3$ ):  $\delta$  ppm 15.4, 37.0, 116.9, 119.4, 123.8, 127.1, 128.1, 136.0, 168.9.

**7-methyl-2H-benzo[b][1,4]oxazin-3(4H)-one 2o**<sup>[2]</sup>

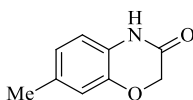

**2o**

Known compound, 95% yield;  $^1\text{H}$  NMR (400 MHz,  $\text{CDCl}_3$ ):  $\delta$  ppm 2.28 (s, 3H), 4.60 (s, 2H), 6.67 (s, 1H), 6.78 (d,  $J = 8.0$  Hz, 1H), 6.87 (d,  $J = 8.4$  Hz, 1H), 9.41 (s, 1H);  $^{13}\text{C}$  NMR (100 MHz,  $\text{CDCl}_3$ ):  $\delta$  ppm 20.7, 67.2, 116.5, 116.7, 120.3, 124.7, 125.8, 132.5, 166.6.

**6-methyl-2H-benzo[b][1,4]oxazin-3(4H)-one 2p**<sup>[2]</sup>

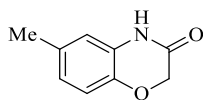

**2p**

Known compound, 95% yield;  $^1\text{H}$  NMR (400 MHz,  $\text{CDCl}_3$ ):  $\delta$  ppm 2.28 (s, 3H), 4.60 (s, 2H), 6.67 (s, 1H), 6.78 (dd,  $J^1 = 8.4$  Hz,  $J^2 = 1.2$  Hz, 1H), 6.86 (d,  $J = 7.6$  Hz, 1H), 9.36 (s, 1H);  $^{13}\text{C}$  NMR (100 MHz,  $\text{CDCl}_3$ ):  $\delta$  ppm 20.6, 67.2, 116.4, 116.5, 124.7, 125.7, 132.5, 141.4, 166.7.

**6-methoxy-2H-benzo[b][1,4]oxazin-3(4H)-one 2q**<sup>[2]</sup>

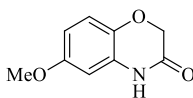

**2q**

Known compound, 96% yield;  $^1\text{H}$  NMR (400 MHz,  $\text{CDCl}_3$ ):  $\delta$  ppm 3.76 (s, 3H), 4.57 (s, 2H), 6.40 (d,  $J = 2.4$  Hz, 1H), 6.50 (dd,  $J^1 = 8.6$  Hz,  $J^2 = 3.2$  Hz, 1H), 6.85 (d,  $J = 8.8$  Hz, 1H), 8.93 (s, 1H);  $^{13}\text{C}$  NMR (100 MHz,  $\text{CDCl}_3$ ):  $\delta$  ppm 55.8, 67.4, 102.1, 108.8, 117.2, 126.8, 137.6, 155.3, 166.6.

**1H-naphtho[2,1-b][1,4]oxazin-2(3H)-one 2r**

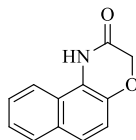

**2r**

96% yield, m.p. 207~208 °C;  $^1\text{H}$  NMR (400 MHz,  $\text{CDCl}_3$ ):  $\delta$  ppm 4.76 (s, 2H), 7.22 (d,  $J = 8.2$  Hz, 1H), 7.43 (td,  $J^1 = 7.8$  Hz,  $J^2 = 0.8$  Hz, 1H), 7.54 (d,  $J = 9.2$  Hz, 1H), 7.58 (td,  $J^1 = 7.8$  Hz,  $J^2 = 1.2$  Hz, 1H), 7.83 (d,  $J = 8.4$  Hz, 1H), 7.94 (d,  $J = 8.0$  Hz, 1H), 9.66 (s, 1H);  $^{13}\text{C}$  NMR (100 MHz,  $\text{CDCl}_3$ ):  $\delta$  ppm 67.5, 117.4, 118.7, 119.0, 123.0, 124.3, 124.7, 127.0, 128.7, 130.0, 140.6, 166.0; IR  $\nu$  ( $\text{cm}^{-1}$ ): 3189.9, 2961.3, 2877.5, 1681.8, 1458.9; HRMS calcd for  $\text{C}_{12}\text{H}_9\text{NO}_2$  ( $\text{M}+\text{Na}$ ) $^+$  222.0531, found 222.0527.

**8-amino-2H-benzo[b][1,4]oxazin-3(4H)-one 2s<sup>9</sup>**

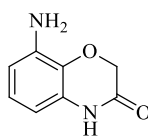

**2s**

Known compound, 85% yield,  $^1\text{H}$  NMR (400 MHz,  $\text{CDCl}_3$ ):  $\delta$  ppm 4.73 (s, 2H), 6.73 (dd,  $J^1 = 8.0$  Hz,  $J^2 = 1.2$  Hz, 1H), 6.90 (t,  $J = 8.0$  Hz, 1H), 7.06 (dd,  $J^1 = 8.0$  Hz,  $J^2 = 1.2$  Hz, 1H), 8.61 (s, 1H);  $^{13}\text{C}$  NMR (100 MHz,  $\text{CDCl}_3$ ):  $\delta$  ppm 67.4, 114.3, 122.2, 122.9, 125.1, 127.1, 139.8, 165.4.

## IV. References

1. M. Wrickban, J. Navendu, T. Bryant, W. Donald, D. Tom, *J. Am. Chem. Soc.*, 2017, **139**, 5031.
2. (a) C. Rajitha, P. K. Dubey, V. Sunku, F. J. Piedrafita, V. R. Veeramani, M. Pal, *Eur. J. Med. Chem.*, 2011, **46**, 4887; (b) C. Ramesh, B. R. Raju, V. Kavala, C. W. Kuo, C. F. Yao, *Tetrahedron*, 2011, **67**, 1187.
3. C. L. Su, C. L. Tseng, C. Ramesh, H. S. Liu, C. Y. Huang, C. F. Yao, *Eur. J. Med. Chem.*, 2017, **132**, 90.
4. P. Stefanic, K. Turnsek, D. Kikelj, *Tetrahedron*, 2003, **59**, 7123.
5. D. Chen, G. Shen, W. Bao, *Org. Biomol. Chem.*, 2009, **7**, 4067.
6. S. Ceylan, L. Coutable, J. Wegner, A. Kirschning, *Chem. Eur. J.* 2011, **17**, 1884.
7. W. S. Huang, R. Xu, R. Dodd, W. C. Shakespeare, *Tetrahedron Lett.*, 2013, **54**, 5214.
8. F. Babudri, S. Florio, G. Indelicati, G. Trapani, *J. Org. Chem.*, 1983, **48**, 4082.
9. P. Smid, H. Coolen, H. G. Keizer, R. Hes, J. Moes, A. P. Hartog, B. Stork, R. H. Plekkenpol, L. C. Niemann, C. Stroomer, M. Tulp, H., Stuivenberg, A. McCreary, M. Hesselink, H. J. Arnoud, C. G. Kruse, *J. Med. Chem.*, 2005, **48**, 6855.

## IV. $^1\text{H}$ and $^{13}\text{C}$ NMR spectra of the synthetic compounds

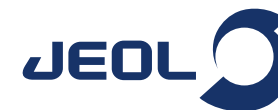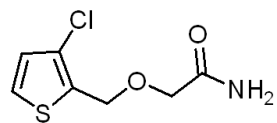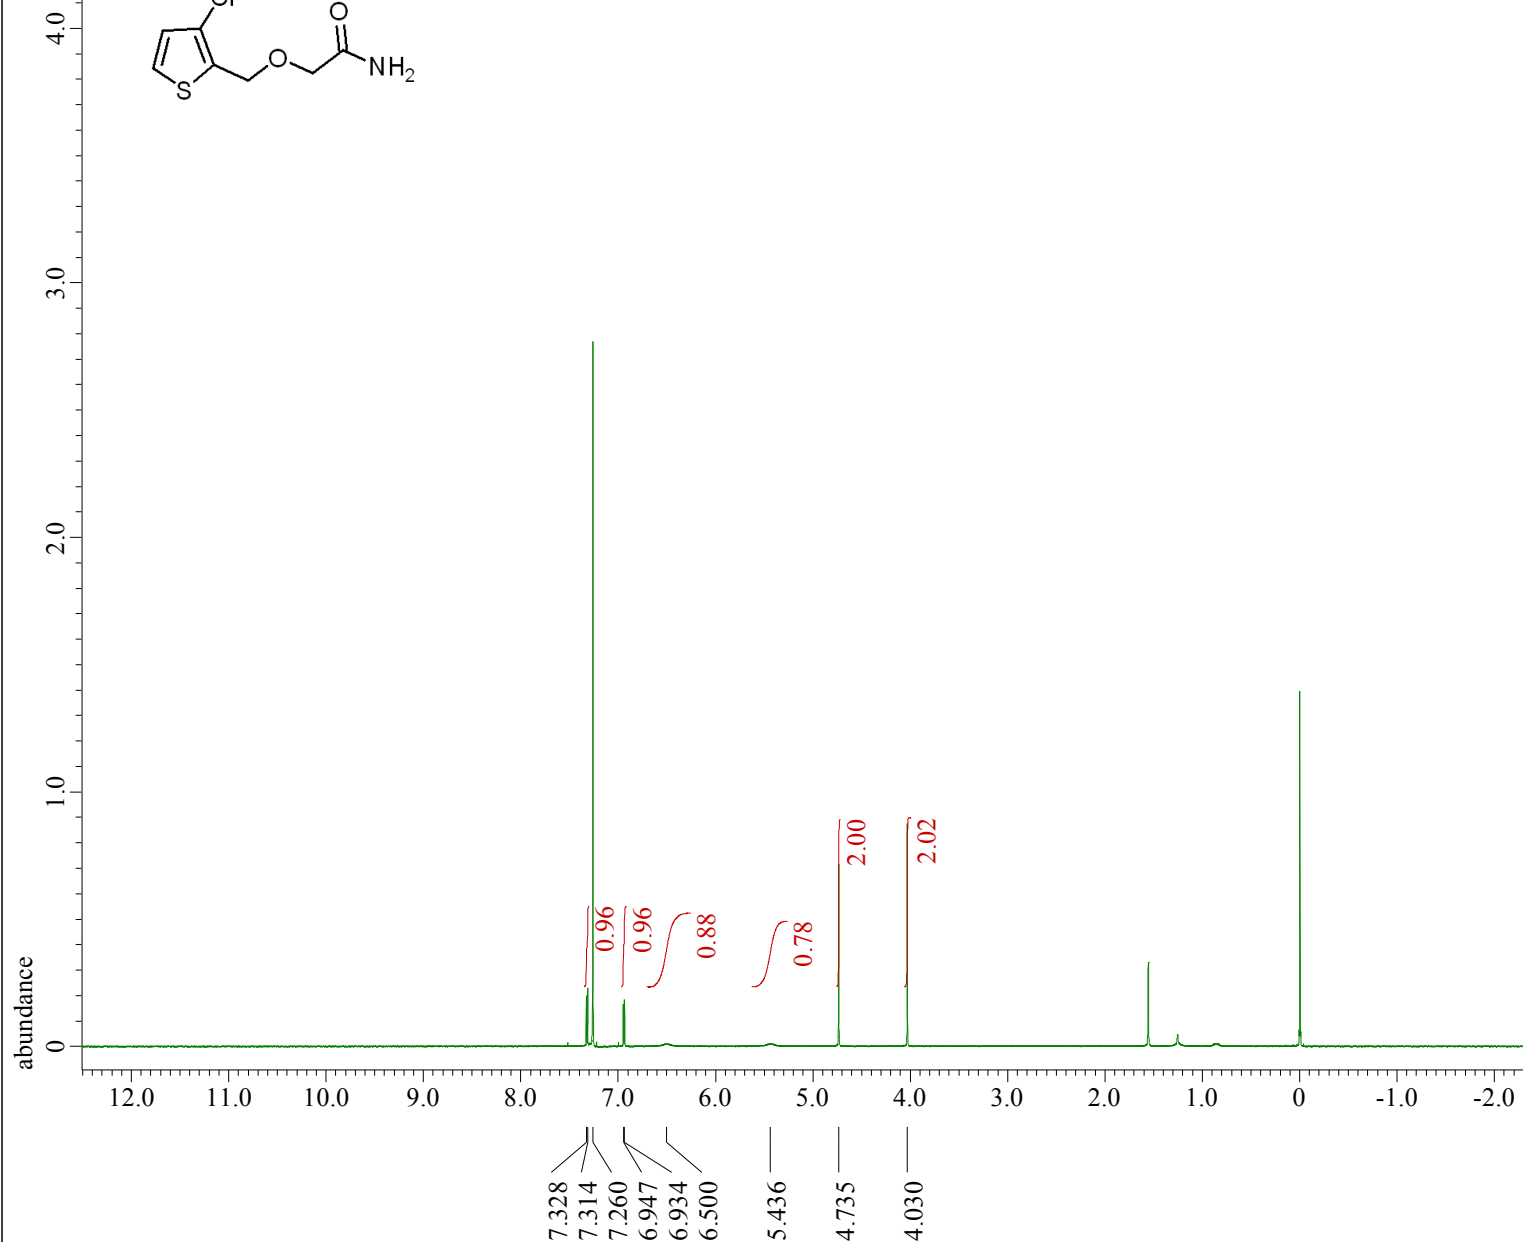

X : parts per Million : Proton

```
---- PROCESSING PARAMETERS ----
sexp( 0.2[Hz], 0.0[s] )
trapezoid( 0[%], 0[%], 80[%], 100[%] )
zerofill( 1 )
fft( 1, TRUE, TRUE )
machinephase
ppm
```

```
Filename      = ZRL-4-531_Proton-1-3.
Author       = delta
Experiment   = proton.jxp
Sample_Id    = ZRL-4-531
Solvent      = CHLOROFORM-D
Actual_Start_Time = 28-OCT-2017 16:37:53
Revision_Time  = 29-OCT-2017 16:13:48
```

```
Comment      = single_pulse
Data_Format  = 1D COMPLEX
Dim_Size     = 13107
Dim_Title    = Proton
Dim_Units    = [ppm]
Dimensions   = X
Spectrometer = JNM-ECZ400S/L1
```

```
Field_Strength = 9.389766[T] (400[MHz])
X_Acq_Duration = 2.18628096[s]
X_Domain       = 1H
X_Freq         = 399.78219838[MHz]
X_Offset       = 5[ppm]
X_Points       = 16384
X_Prescans     = 1
X_Resolution   = 0.45739775[Hz]
X_Sweep        = 7.4940048[kHz]
X_Sweep_Clipped = 5.99520384[kHz]
Irr_Domain     = Proton
Irr_Freq       = 399.78219838[MHz]
Irr_Offset     = 5[ppm]
Tri_Domain     = Proton
Tri_Freq       = 399.78219838[MHz]
Tri_Offset     = 5[ppm]
Clipped        = FALSE
Scans          = 8
Total_Scans    = 8
```

```
Relaxation_Delay = 5[s]
Recvr_Gain       = 66
Temp_Get         = 20.1[dC]
X_90_Width      = 9.5[us]
X_Acq_Time      = 2.18628096[s]
X_Angle         = 45[deg]
X_Atn           = 2[dB]
X_Pulse         = 4.75[us]
Irr_Mode        = Off
Tri_Mode        = Off
Dante_Loop      = 500
Dante_Presat    = FALSE
```

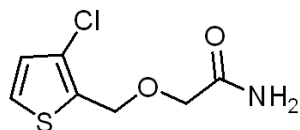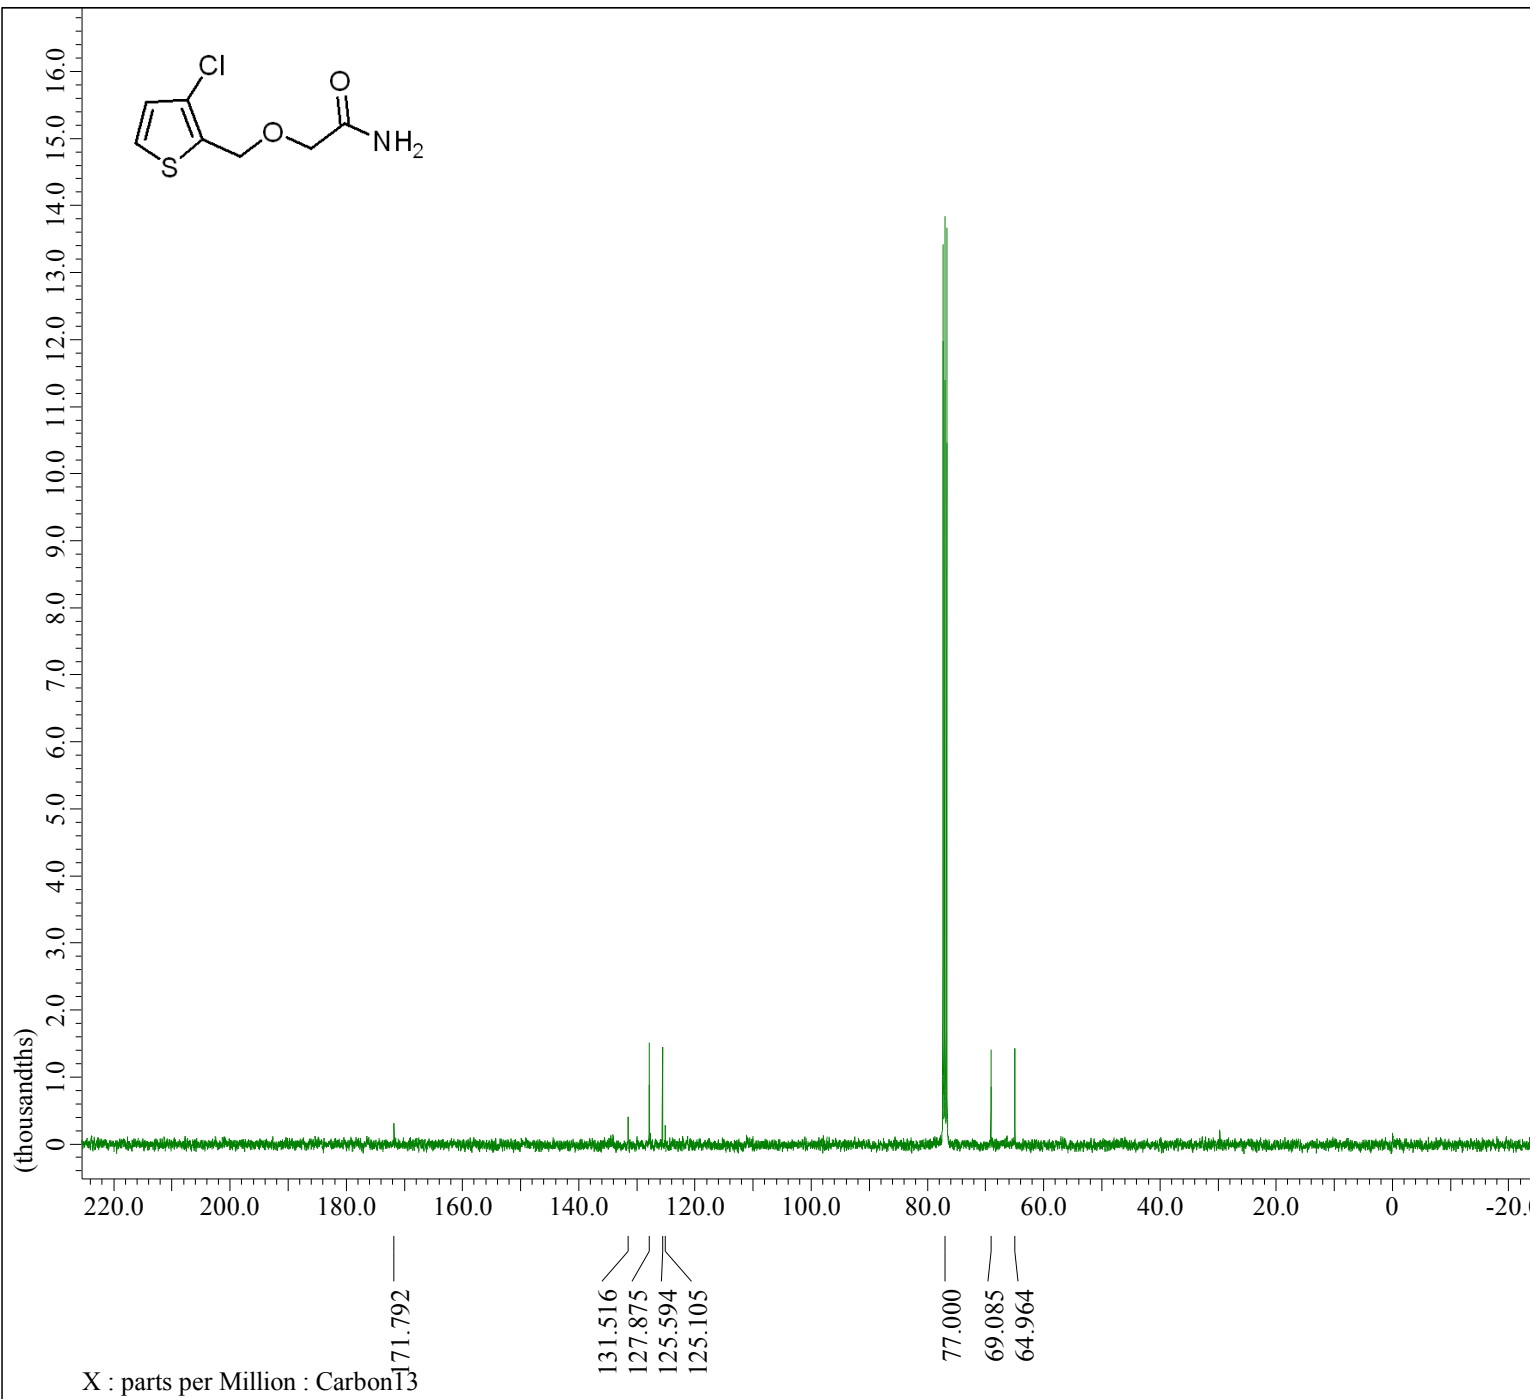

---- PROCESSING PARAMETERS ----  
sexp( 2.0[Hz], 0.0[s] )  
trapezoid( 0[%], 0[%], 80[%], 100[%] )  
zerofill( 1 )  
fft( 1, TRUE, TRUE )  
machinephase  
ppm

Derived from: ZRL-4-531-1\_Carbon-2-1.jdf

Filename = ZRL-4-531-1\_Carbon  
Author = delta  
Experiment = carbon.jxp  
Sample\_Id = ZRL-4-531-1  
Solvent = CHLOROFORM-D  
Actual\_Start\_Time = 28-OCT-2017 17:25:  
Revision\_Time = 29-OCT-2017 16:19:

Comment = single pulse decou  
Data\_Format = 1D COMPLEX  
Dim\_Size = 26214  
Dim\_Title = Carbon13  
Dim\_Units = [ppm]  
Dimensions = X  
Spectrometer = JNM-ECZ400S/L1

Field\_Strength = 9.389766[T] (400[M  
X\_Acq\_Duration = 1.03809024[s]  
X\_Domain = 13C  
X\_Freq = 100.52530333[MHz]  
X\_Offset = 100[ppm]  
X\_Points = 32768  
X\_Prescans = 4  
X\_Resolution = 0.96330739[Hz]  
X\_Sweep = 31.56565657[kHz]  
X\_Sweep\_Clipped = 25.25252525[kHz]  
Irr\_Domain = Proton  
Irr\_Freq = 399.78219838[MHz]  
Irr\_Offset = 5[ppm]  
Clipped = FALSE  
Scans = 497  
Total\_Scans = 497

Relaxation\_Delay = 2[s]  
Recvr\_Gain = 50  
Temp\_Get = 20.5[dC]  
X\_90\_Width = 8.8[us]  
X\_Acq\_Time = 1.03809024[s]  
X\_Angle = 30[deg]  
X\_Atn = 3.4[dB]  
X\_Pulse = 2.93333333[us]  
Irr\_Atn\_Dec = 23.66[dB]  
Irr\_Atn\_Dec\_Calc = 23.66[dB]  
Irr\_Atn\_Dec\_Default\_Calc = 23.66[dB]  
Irr\_Atn\_Noec = 23.66[dB]  
Irr\_Dec\_Bandwidth\_Hz = 4.7826087[kHz]  
Irr\_Dec\_Bandwidth\_Ppm = 11.96303566[ppm]  
Irr\_Dec\_Freq = 399.78219838[MHz]

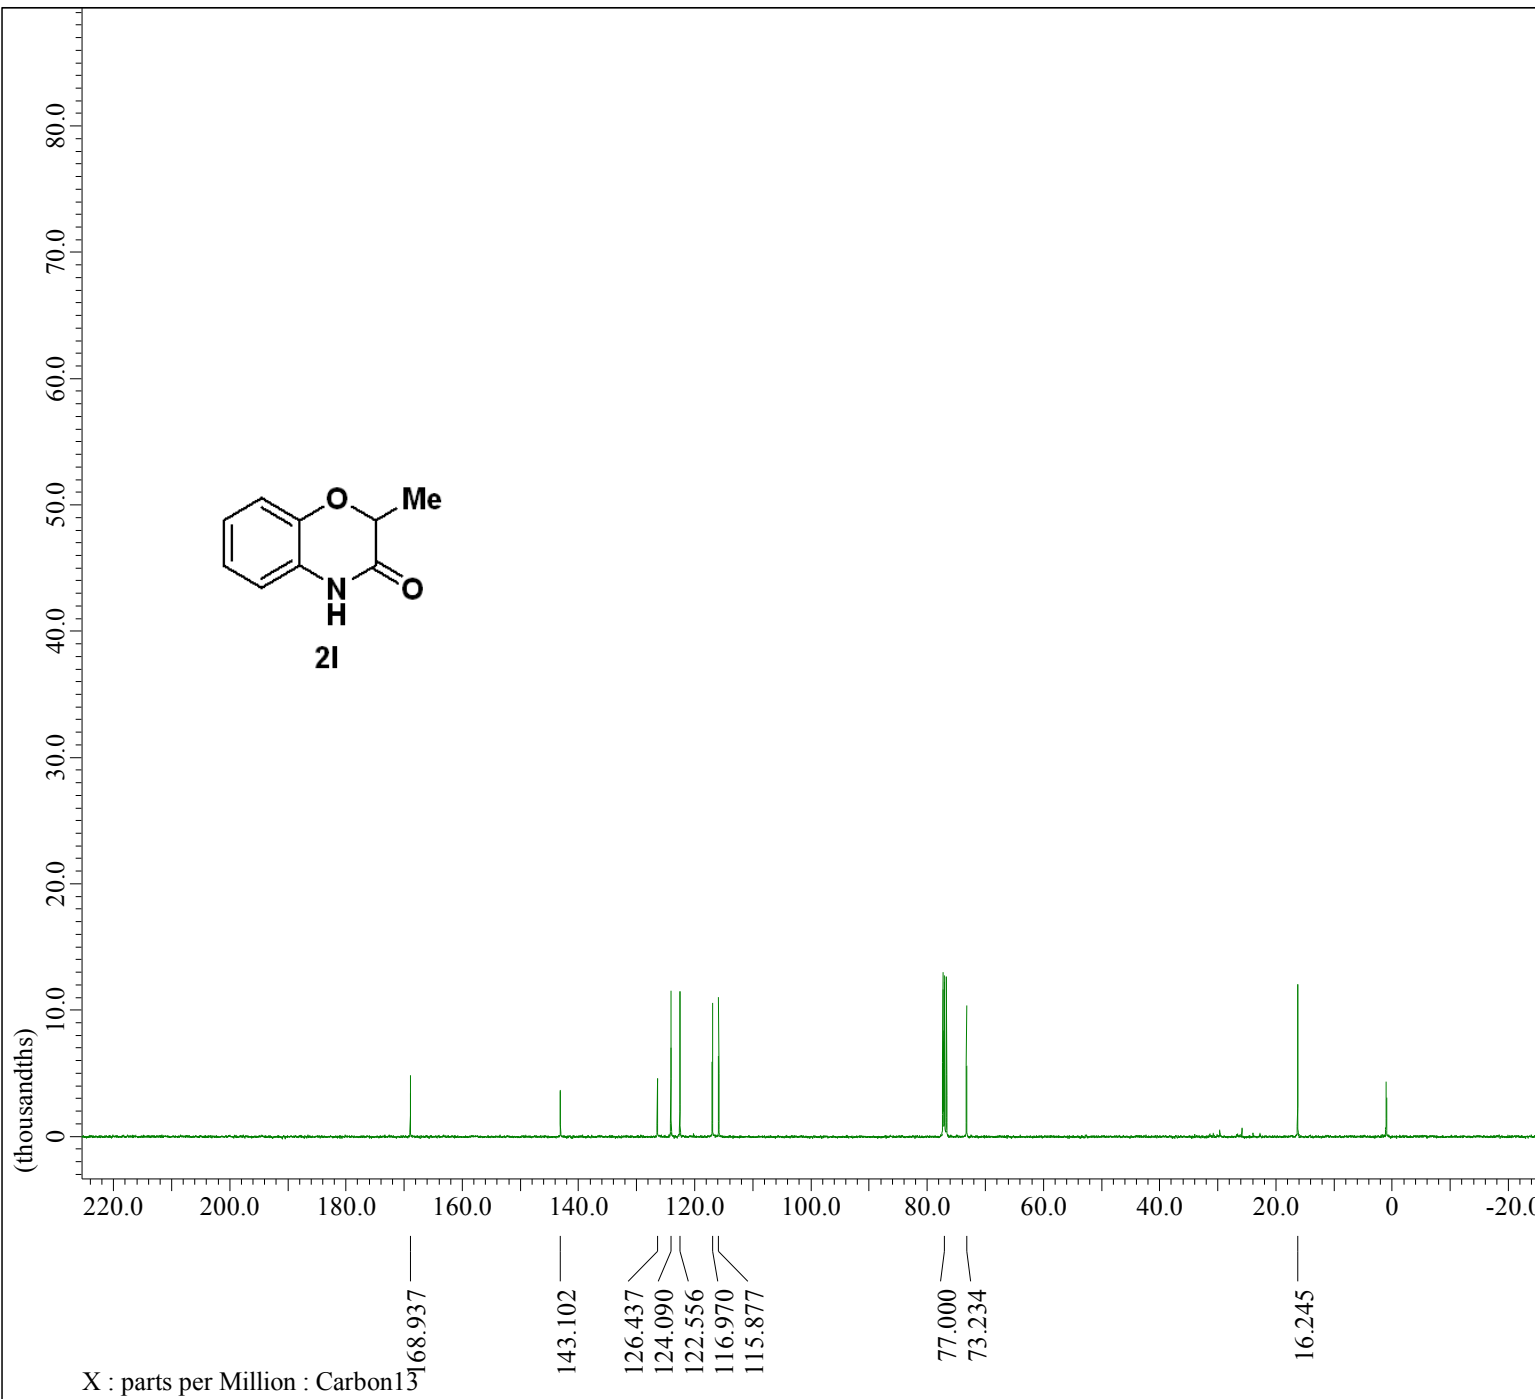

---- PROCESSING PARAMETERS ----  
sexp( 2.0[Hz], 0.0[s] )  
trapezoid( 0[%], 0[%], 80[%], 100[%] )  
zerofill( 1 )  
fft( 1, TRUE, TRUE )  
machinephase  
ppm

Filename = LK-1027-PRODUCT\_Ca  
Author = delta  
Experiment = carbon.jxp  
Sample\_Id = LK-1027-PRODUCT  
Solvent = CHLOROFORM-D  
Actual\_Start\_Time = 1-NOV-2016 14:51:  
Revision\_Time = 15-OCT-2017 18:45:

Comment = single pulse decou  
Data\_Format = 1D COMPLEX  
Dim\_Size = 26214  
Dim\_Title = Carbon13  
Dim\_Units = [ppm]  
Dimensions = X  
Spectrometer = JNM-ECZ400S/L1

Field\_Strength = 9.389766[T] (400[M  
X\_Acq\_Duration = 1.03809024[s]  
X\_Domain = 13C  
X\_Freq = 100.52530333[MHz]  
X\_Offset = 100[ppm]  
X\_Points = 32768  
X\_Prescans = 4  
X\_Resolution = 0.96330739[Hz]  
X\_Sweep = 31.56565657[kHz]  
X\_Sweep\_Clipped = 25.25252525[kHz]  
Irr\_Domain = Proton  
Irr\_Freq = 399.78219838[MHz]  
Irr\_Offset = 5[ppm]  
Clipped = FALSE  
Scans = 406.0  
Total\_Scans = 406.0

Relaxation\_Delay = 2[s]  
Recvr\_Gain = 50  
Temp\_Get = 14.8[dC]  
X\_90\_Width = 8.8[us]  
X\_Acq\_Time = 1.03809024[s]  
X\_Angle = 30[deg]  
X\_Atn = 3.4[dB]  
X\_Pulse = 2.93333333[us]  
Irr\_Atn\_Dec = 23.66[dB]  
Irr\_Atn\_Dec\_Calc = 23.66[dB]  
Irr\_Atn\_Dec\_Default\_Calc = 23.66[dB]  
Irr\_Atn\_Noec = 23.66[dB]  
Irr\_Dec\_Bandwidth\_Hz = 4.7826087[kHz]  
Irr\_Dec\_Bandwidth\_Ppm = 11.96303566[ppm]  
Irr\_Dec\_Freq = 399.78219838[MHz]



---- PROCESSING PARAMETERS ----  
sexp( 0.2[Hz], 0.0[s] )  
trapezoid( 0[%], 0[%], 80[%], 100[%] )  
zerofill( 1 )  
fft( 1, TRUE, TRUE )  
machinephase  
ppm  
Derived from: ZRL-4-571-2L\_Proton-1-1.jdf

Filename = ZRL-4-571-2L\_Proton-1  
Author = delta  
Experiment = proton.jxp  
Sample\_Id = ZRL-4-571-2L  
Solvent = CHLOROFORM-D  
Actual\_Start\_Time = 12-OCT-2017 00:34:22  
Revision\_Time = 15-OCT-2017 18:37:04

Comment = single\_pulse  
Data\_Format = 1D COMPLEX  
Dim\_Size = 13107  
Dim\_Title = Proton  
Dim\_Units = [ppm]  
Dimensions = X  
Spectrometer = JNM-ECZ400S/L1

Field\_Strength = 9.389766[T] (400[MHz])  
X\_Acq\_Duration = 2.18628096[s]  
X\_Domain = 1H  
X\_Freq = 399.78219838[MHz]  
X\_Offset = 5[ppm]  
X\_Points = 16384  
X\_Prescans = 1  
X\_Resolution = 0.45739775[Hz]  
X\_Sweep = 7.4940048[kHz]  
X\_Sweep\_Clippped = 5.99520384[kHz]  
Irr\_Domain = Proton  
Irr\_Freq = 399.78219838[MHz]  
Irr\_Offset = 5[ppm]  
Tri\_Domain = Proton  
Tri\_Freq = 399.78219838[MHz]  
Tri\_Offset = 5[ppm]  
Clipped = FALSE  
Scans = 8  
Total\_Scans = 8

Relaxation\_Delay = 5[s]  
Recvr\_Gain = 66  
Temp\_Get = 18.9[dC]  
X\_90\_Width = 9.5[us]  
X\_Acq\_Time = 2.18628096[s]  
X\_Angle = 45[deg]  
X\_Atn = 2[dB]  
X\_Pulse = 4.75[us]  
Irr\_Mode = Off  
Tri\_Mode = Off  
Dante\_Loop = 500  
Dante\_Presat = FALSE

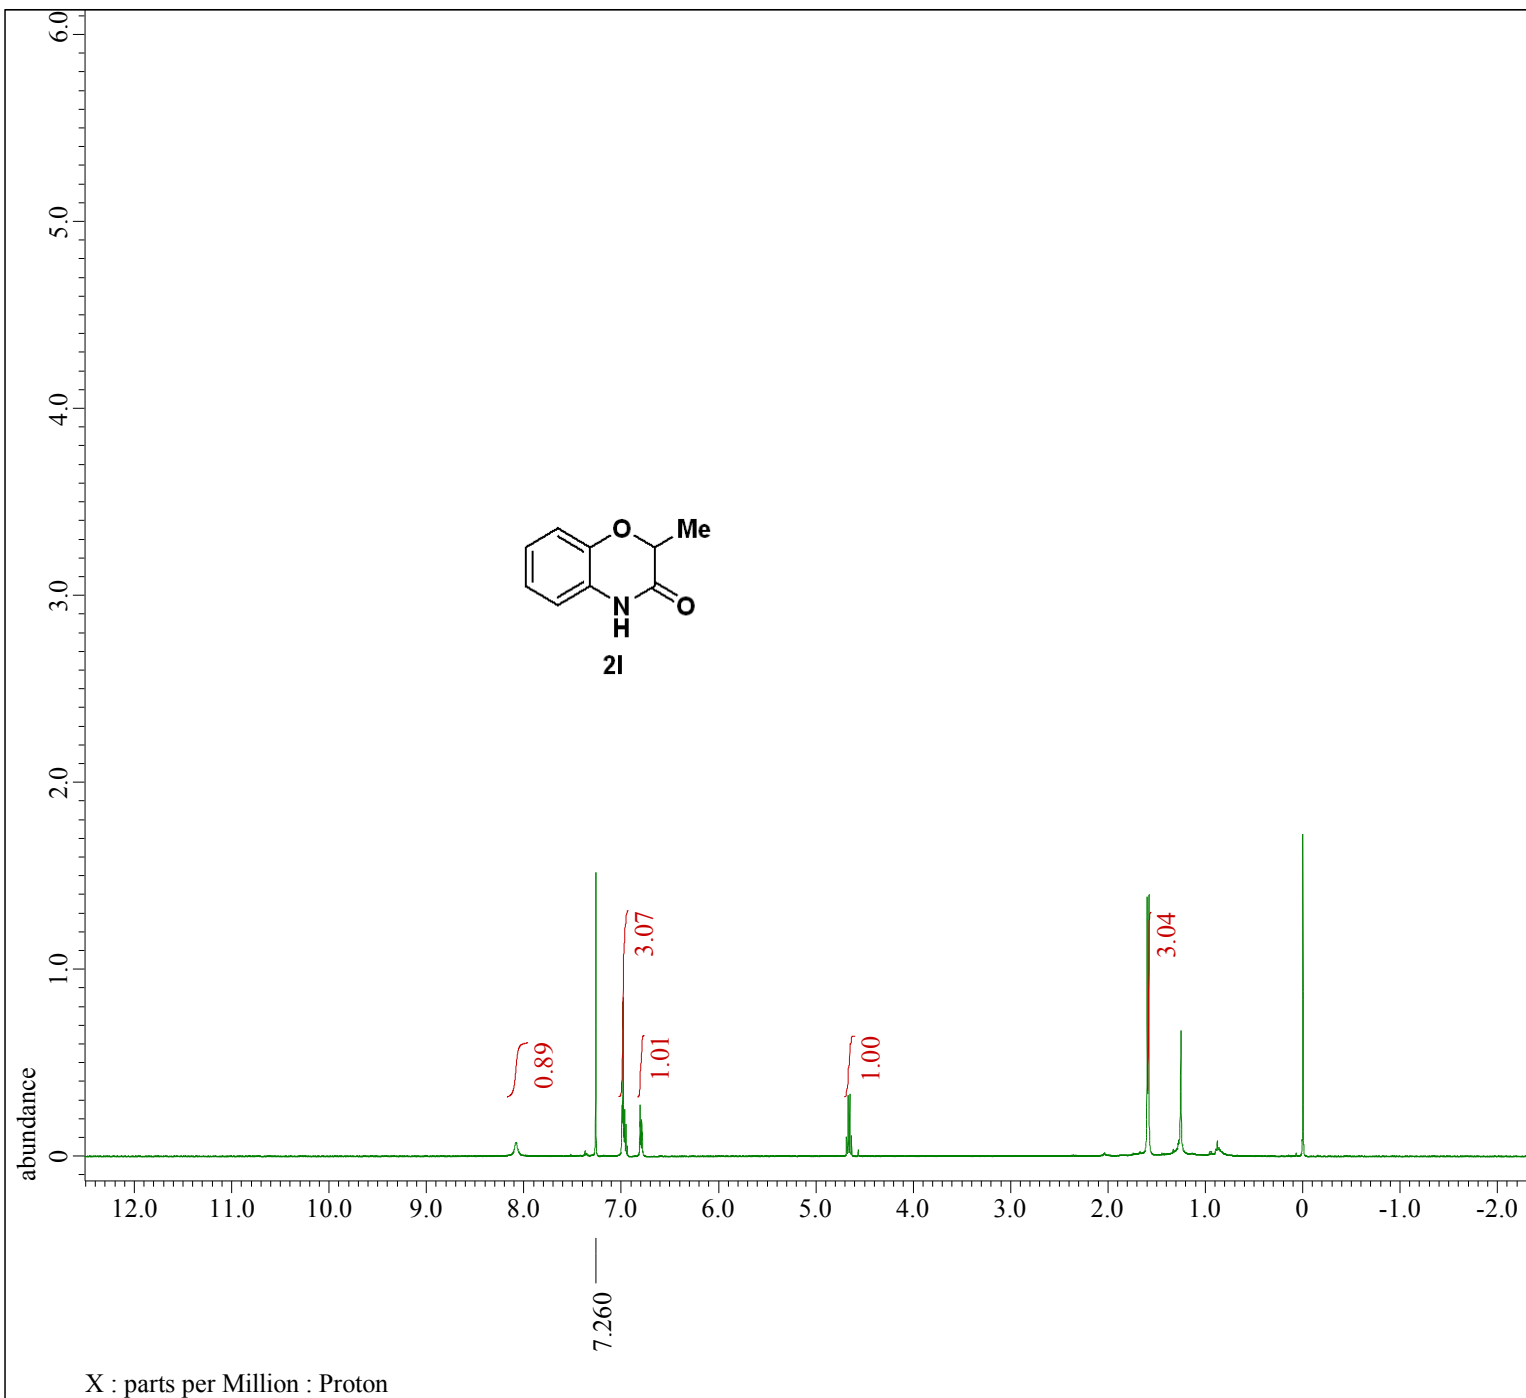

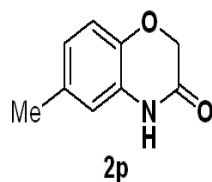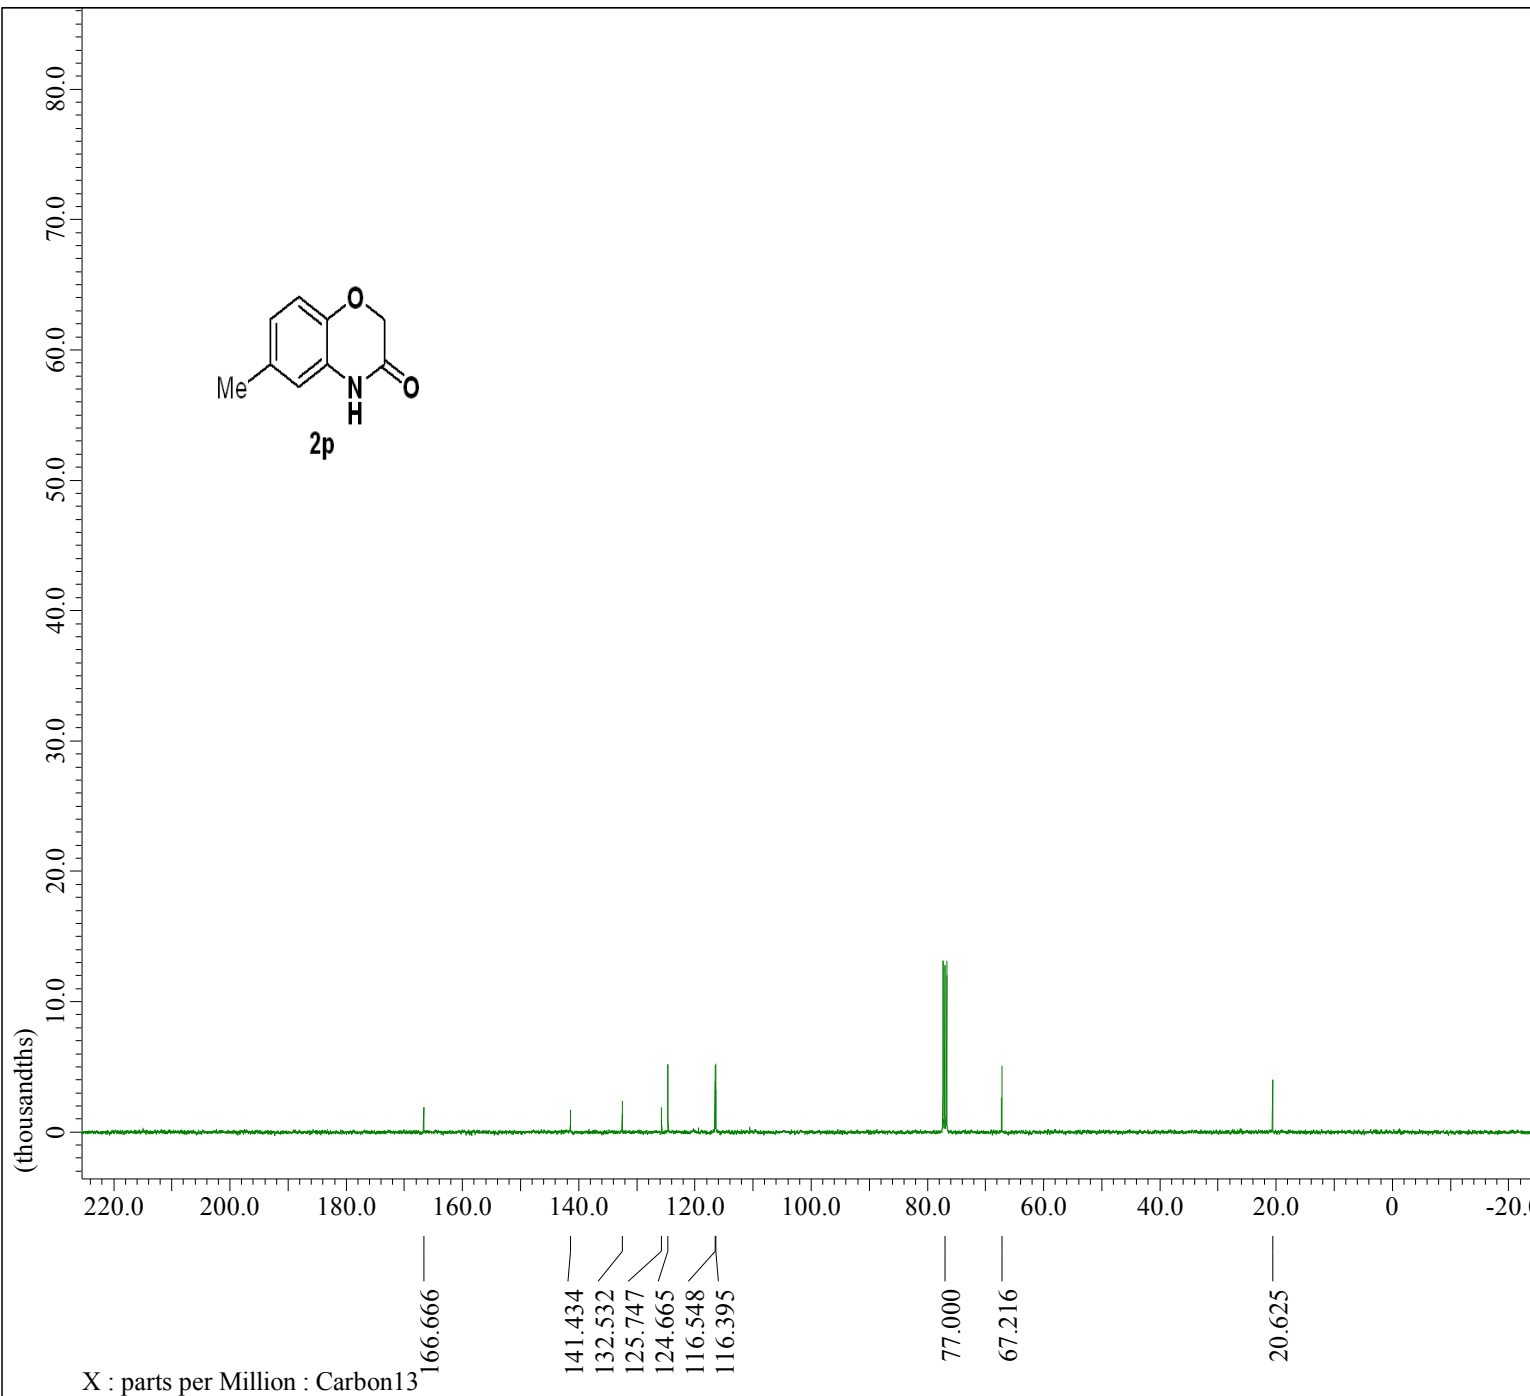

---- PROCESSING PARAMETERS ----  
sexp( 2.0[Hz], 0.0[s] )  
trapezoid( 0[%], 0[%], 80[%], 100[%] )  
zerofill( 1 )  
fft( 1, TRUE, TRUE )  
machinephase  
ppm  
Derived from: LK120903\_Carbon-1-1.jdf

Filename = LK120903\_Carbon-1-  
Author = delta  
Experiment = carbon.jxp  
Sample\_Id = LK120903  
Solvent = CHLOROFORM-D  
Actual\_Start\_Time = 14-DEC-2016 13:53:  
Revision\_Time = 15-OCT-2017 18:48:  
Comment = single pulse decou  
Data\_Format = 1D COMPLEX  
Dim\_Size = 26214  
Dim\_Title = Carbon13  
Dim\_Units = [ppm]  
Dimensions = X  
Spectrometer = JNM-ECZ400S/L1  
Field\_Strength = 9.389766[T] (400[M  
X\_Acq\_Duration = 1.03809024[s]  
X\_Domain = 13C  
X\_Freq = 100.52530333[MHz]  
X\_Offset = 100[ppm]  
X\_Points = 32768  
X\_Prescans = 4  
X\_Resolution = 0.96330739[Hz]  
X\_Sweep = 31.56565657[kHz]  
X\_Sweep\_Clippped = 25.25252525[kHz]  
Irr\_Domain = Proton  
Irr\_Freq = 399.78219838[MHz]  
Irr\_Offset = 5[ppm]  
Clipped = FALSE  
Scans = 161  
Total\_Scans = 161  
Relaxation\_Delay = 2[s]  
Recvr\_Gain = 50  
Temp\_Get = 21.3[dC]  
X\_90\_Width = 8.8[us]  
X\_Acq\_Time = 1.03809024[s]  
X\_Angle = 30[deg]  
X\_Atn = 3.4[dB]  
X\_Pulse = 2.93333333[us]  
Irr\_Atn\_Dec = 23.66[dB]  
Irr\_Atn\_Dec\_Calc = 23.66[dB]  
Irr\_Atn\_Dec\_Default\_Calc = 23.66[dB]  
Irr\_Atn\_Noie = 23.66[dB]  
Irr\_Dec\_Bandwidth\_Hz = 4.7826087[kHz]  
Irr\_Dec\_Bandwidth\_Ppm = 11.96303566[ppm]  
Irr\_Dec\_Freq = 399.78219838[MHz]



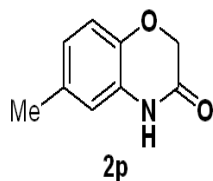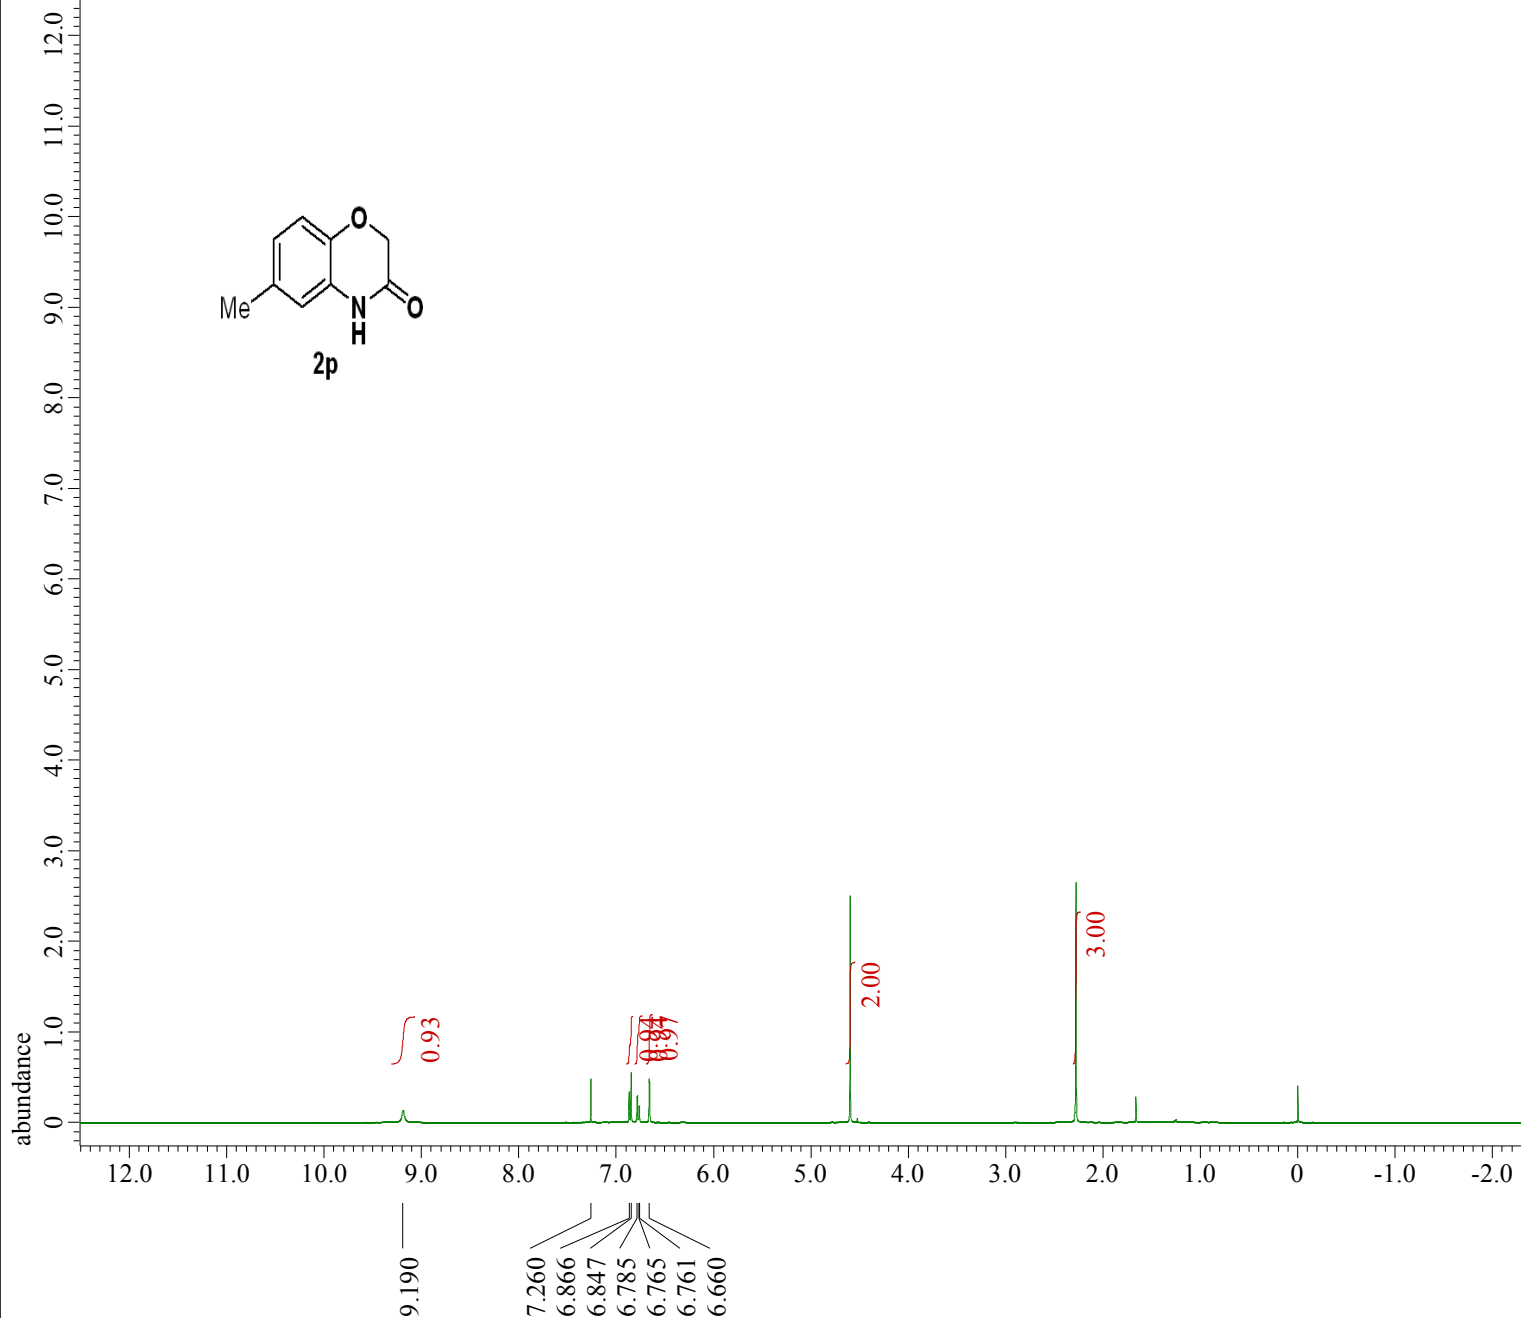

X : parts per Million : Proton

---- PROCESSING PARAMETERS ----  
sexf( 0.2[Hz], 0.0[s] )  
trapezoid( 0[%], 0[%], 80[%], 100[%] )  
zerofill( 1 )  
fft( 1, TRUE, TRUE )  
machinephase  
ppm  
Derived from: ZRL-4-552-2P\_Proton-1-1.jdf

|                   |                          |
|-------------------|--------------------------|
| Filename          | = ZRL-4-552-2P_Proton-1  |
| Author            | = delta                  |
| Experiment        | = proton.jxp             |
| Sample_Id         | = ZRL-4-552-2P           |
| Solvent           | = CHLOROFORM-D           |
| Actual_Start_Time | = 12-OCT-2017 00:38:44   |
| Revision_Time     | = 15-OCT-2017 21:37:29   |
| Comment           | = single_pulse           |
| Data_Format       | = 1D COMPLEX             |
| Dim_Size          | = 13107                  |
| Dim_Title         | = Proton                 |
| Dim_Units         | = [ppm]                  |
| Dimensions        | = X                      |
| Spectrometer      | = JNM-ECZ400S/L1         |
| Field_Strength    | = 9.389766[T] (400[MHz]) |
| X_Acq_Duration    | = 2.18628096[s]          |
| X_Domain          | = 1H                     |
| X_Freq            | = 399.78219838[MHz]      |
| X_Offset          | = 5[ppm]                 |
| X_Points          | = 16384                  |
| X_Prescans        | = 1                      |
| X_Resolution      | = 0.45739775[Hz]         |
| X_Sweep           | = 7.4940048[kHz]         |
| X_Sweep_Clipped   | = 5.99520384[kHz]        |
| Irr_Domain        | = Proton                 |
| Irr_Freq          | = 399.78219838[MHz]      |
| Irr_Offset        | = 5[ppm]                 |
| Tri_Domain        | = Proton                 |
| Tri_Freq          | = 399.78219838[MHz]      |
| Tri_Offset        | = 5[ppm]                 |
| Clipped           | = FALSE                  |
| Scans             | = 8                      |
| Total_Scans       | = 8                      |
| Relaxation_Delay  | = 5[s]                   |
| Recvr_Gain        | = 56                     |
| Temp_Get          | = 18.8[dC]               |
| X_90_Width        | = 9.5[us]                |
| X_Acq_Time        | = 2.18628096[s]          |
| X_Angle           | = 45[deg]                |
| X_Atn             | = 2[dB]                  |
| X_Pulse           | = 4.75[us]               |
| Irr_Mode          | = Off                    |
| Tri_Mode          | = Off                    |
| Dante_Loop        | = 500                    |
| Dante_Presat      | = FALSE                  |

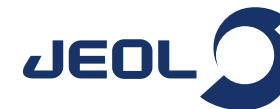

---- PROCESSING PARAMETERS ----

```
sexp( 0.2[Hz], 0.0[s] )
trapezoid( 0[%], 0[%], 80[%], 100[%] )
zerofill( 1 )
fft( 1, TRUE, TRUE )
machinephase
ppm
```

Derived from: LK-7YUANHUAN\_Proton-1-1.jdf

```
Filename      = LK-7YUANHUAN_Proton-1
Author       = delta
Experiment   = proton.jxp
Sample Id    = LK-7YUANHUAN
Solvent      = CHLOROFORM-D
Actual_Start_Time = 11-AUG-2016 10:12:23
Revision_Time   = 8-AUG-2017 16:11:36
```

```
Comment      = single_pulse
Data_Format  = 1D_COMPLEX
Dim_Size     = 13107
Dim_Title    = Proton
Dim_Units    = [ppm]
Dimensions   = X
Spectrometer = JNM-ECZ400S/L1
```

```
Field_Strength = 9.389766[T] (400[MHz])
X_Acq_Duration = 2.18628096[s]
X_Domain      = 1H
X_Freq        = 399.78219838[MHz]
X_Offset      = 5[ppm]
X_Points      = 16384
X_Prescans    = 1
X_Resolution  = 0.45739775[Hz]
X_Sweep       = 7.4940048[kHz]
X_Sweep_Clippped = 5.99520384[kHz]
Irr_Domain    = Proton
Irr_Freq      = 399.78219838[MHz]
Irr_Offset    = 5[ppm]
Tri_Domain    = Proton
Tri_Freq      = 399.78219838[MHz]
Tri_Offset    = 5[ppm]
Clipped       = FALSE
Scans         = 8
Total_Scans   = 8
```

```
Relaxation_Delay = 5[s]
Recvr_Gain       = 66
Temp_Get         = 19.8[dC]
X_90_Width      = 9.5[us]
X_Acq_Time      = 2.18628096[s]
X_Angle         = 45[deg]
X_Atn           = 2[dB]
X_Pulse         = 4.75[us]
Irr_Mode        = Off
Tri_Mode        = Off
Dante_Loop      = 500
Dante_Presat    = FALSE
```

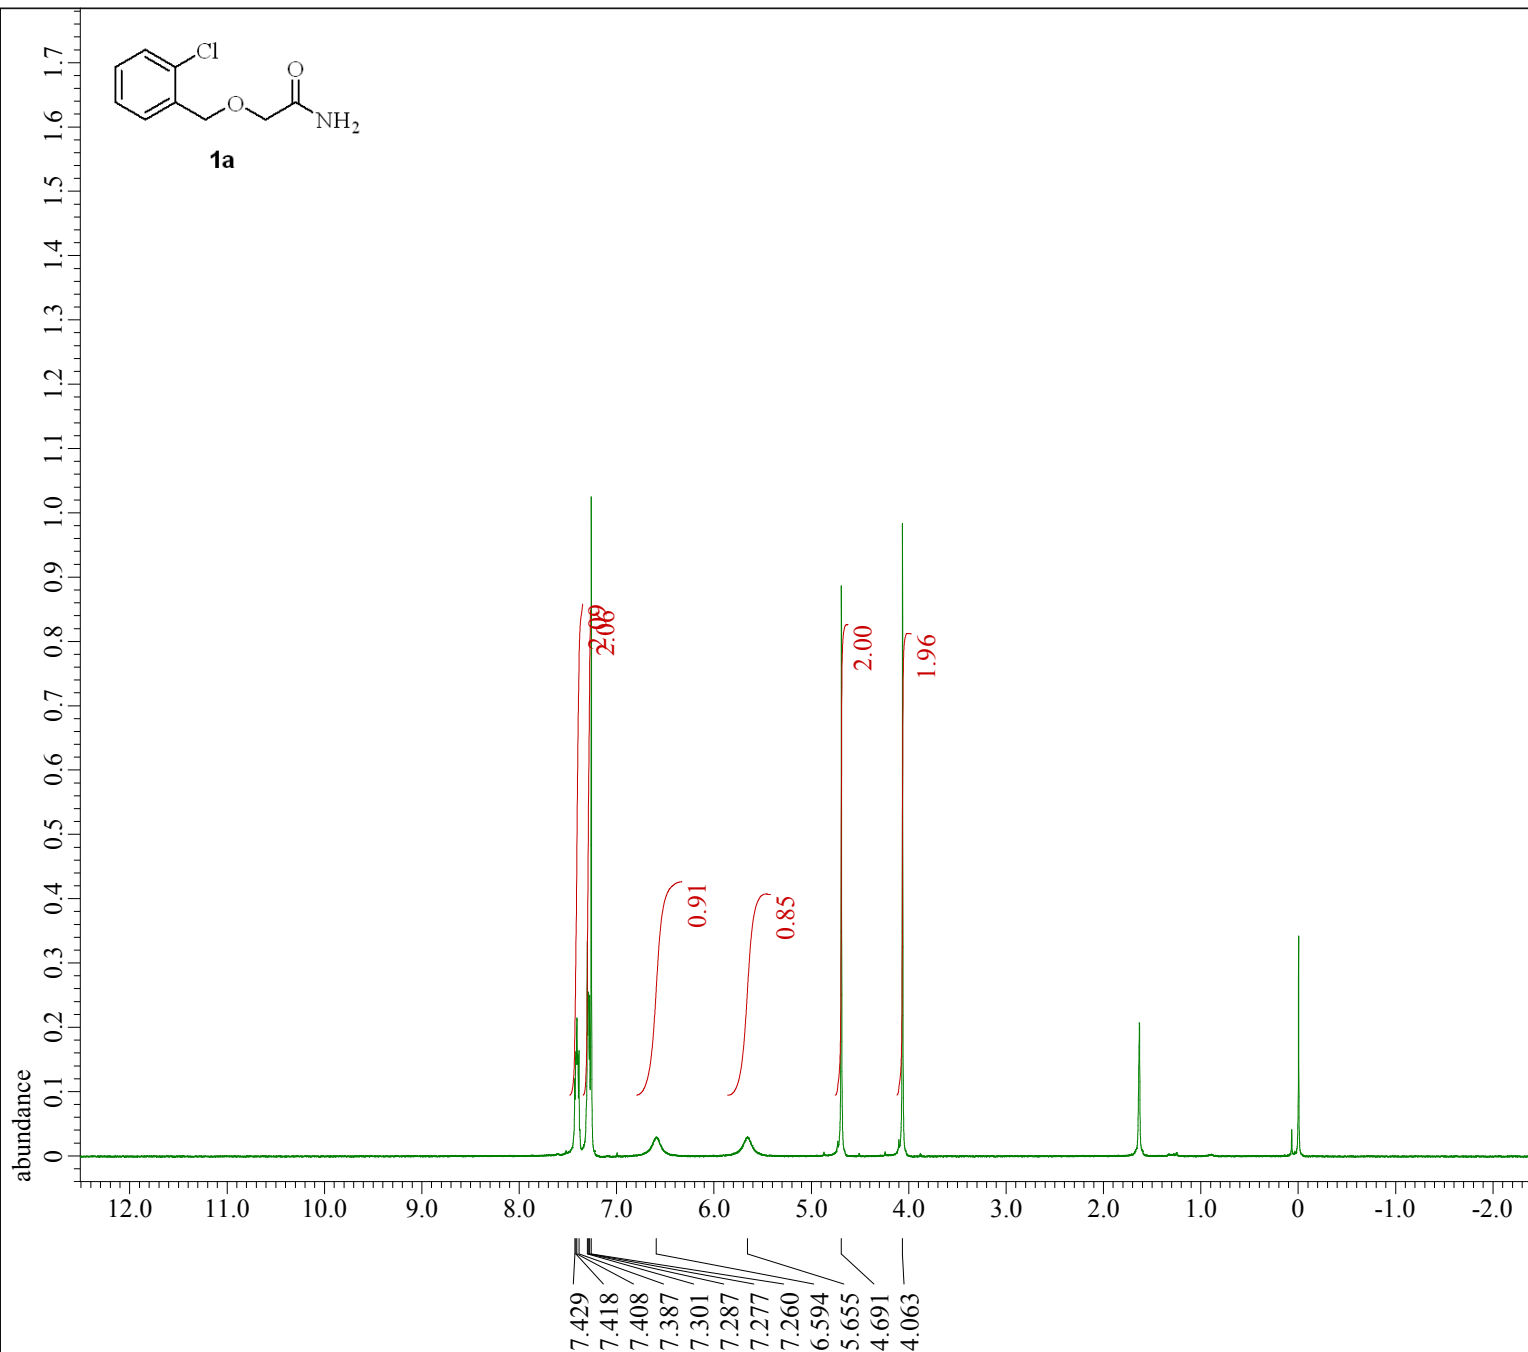

7.429  
7.418  
7.408  
7.387  
7.301  
7.287  
7.277  
7.260  
6.594  
5.655  
4.691  
4.063

X : parts per Million : Proton

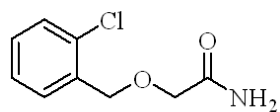

1a

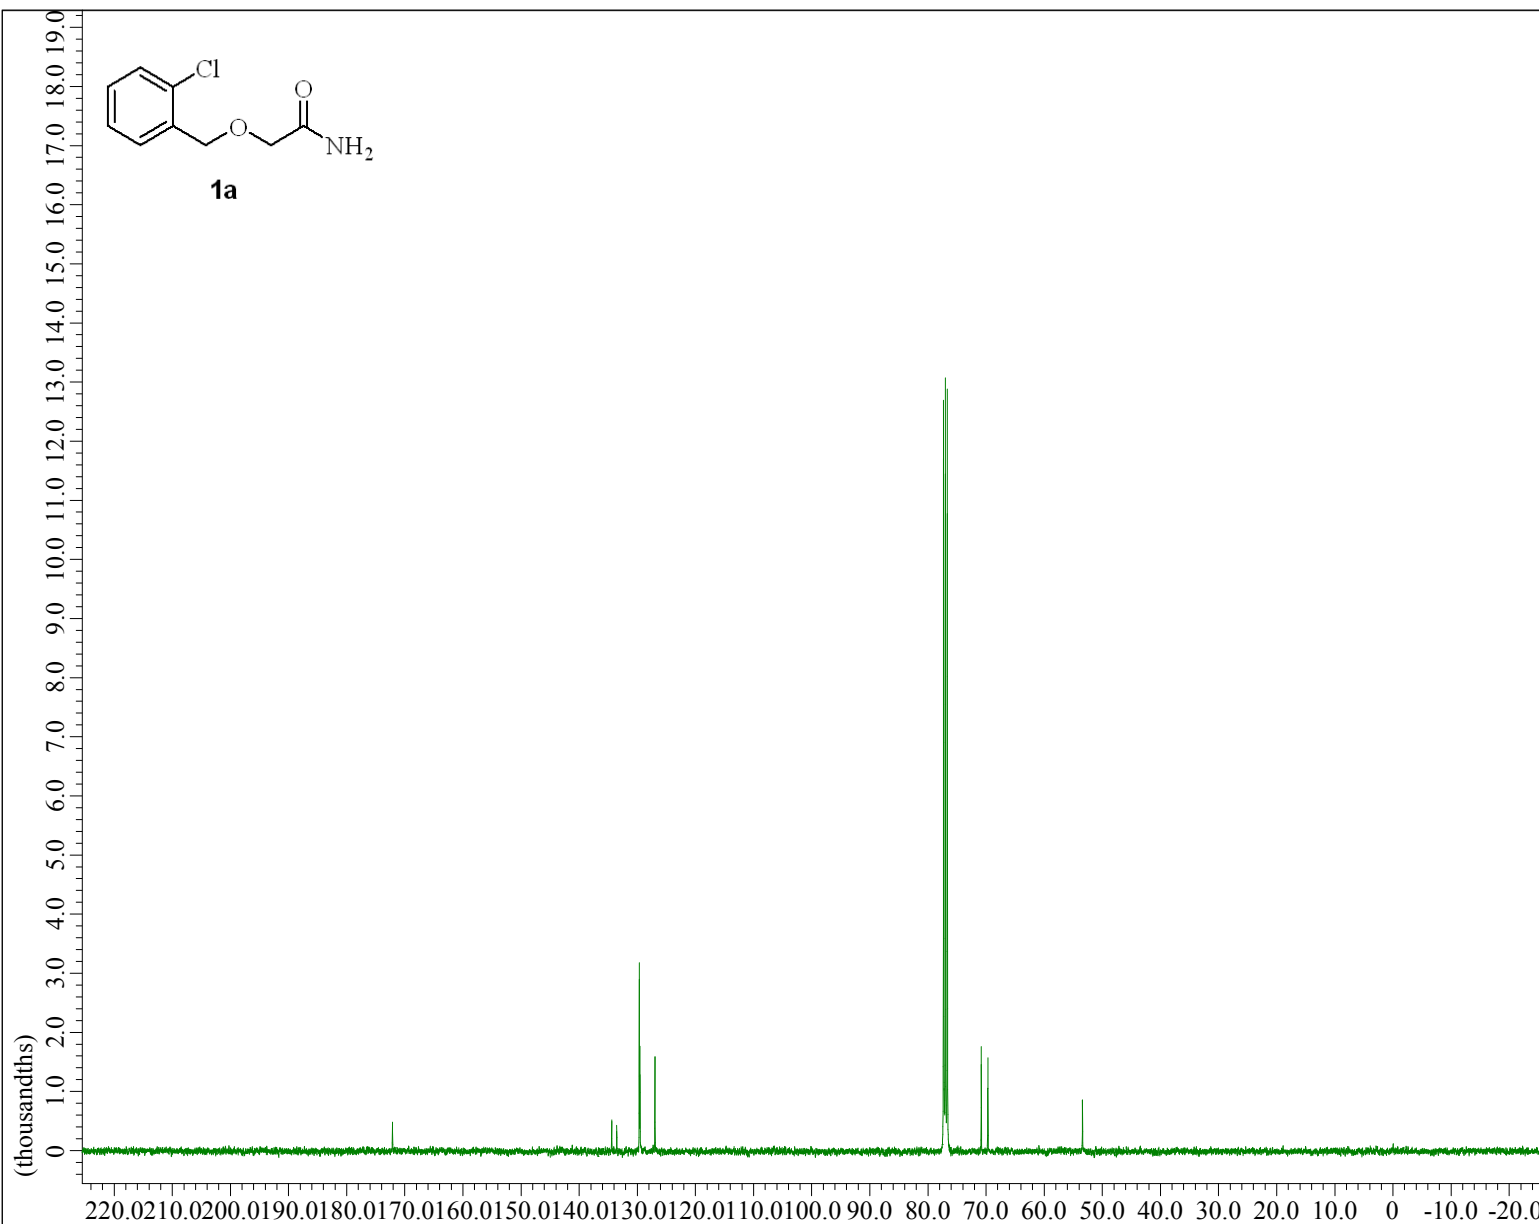

X : parts per Million : Carbon13

172.128

134.410

133.548

129.667

129.542

126.974

77.000

70.838

69.698

---- PROCESSING PARAMETERS ----

```
sexp( 2.0[Hz], 0.0[s] )
trapezoid( 0[%], 0[%], 80[%], 100[%] )
zerofill( 1 )
fft( 1, TRUE, TRUE )
machinephase
ppm
```

Derived from: LK032117-4\_Carbon-1-1.jdf

```
Filename           = LK032117-4_Carbon-
Author             = delta
Experiment         = carbon.jxp
Sample_Id          = LK032117-4
Solvent            = CHLOROFORM-D
Actual_Start_Time  = 21-MAR-2017 14:15:
Revision_Time      = 8-AUG-2017 16:20:
```

```
Comment           = single pulse decou
Data_Format       = 1D COMPLEX
Dim_Size          = 26214
Dim_Title         = Carbon13
Dim_Units         = [ppm]
Dimensions        = X
Spectrometer      = JNM-ECZ400S/L1
```

```
Field_Strength    = 9.389766[T] (400[M
X_Acq_Duration    = 1.03809024[s]
X_Domain          = 13C
X_Freq            = 100.52530333[MHz]
X_Offset          = 100[ppm]
X_Points          = 32768
X_Prescans        = 4
X_Resolution      = 0.96330739[Hz]
X_Sweep           = 31.56565657[kHz]
X_Sweep_Clipped   = 25.25252525[kHz]
Irr_Domain        = Proton
Irr_Freq          = 399.78219838[MHz]
Irr_Offset        = 5[ppm]
Clipped           = FALSE
Scans             = 1024
Total_Scans       = 1024
```

```
Relaxation_Delay  = 2[s]
Recvr Gain        = 50
Temp_Get          = 23.4[dC]
X_90_Width        = 8.8[us]
X_Acq_Time        = 1.03809024[s]
X_Angle           = 30[deg]
X_Atn             = 3.4[dB]
X_Pulse          = 2.93333333[us]
Irr_Atn_Dec       = 23.66[dB]
Irr_Atn_Dec_Calc  = 23.66[dB]
Irr_Atn_Dec_Default_Calc = 23.66[dB]
Irr_Atn_Noise    = 23.66[dB]
Irr_Dec_Bandwidth_Hz = 4.7826087[kHz]
Irr_Dec_Bandwidth_Ppm = 11.96303566[ppm]
Irr_Dec_Freq      = 399.78219838[MHz]
```

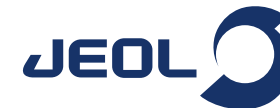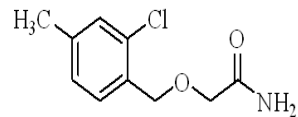

1b

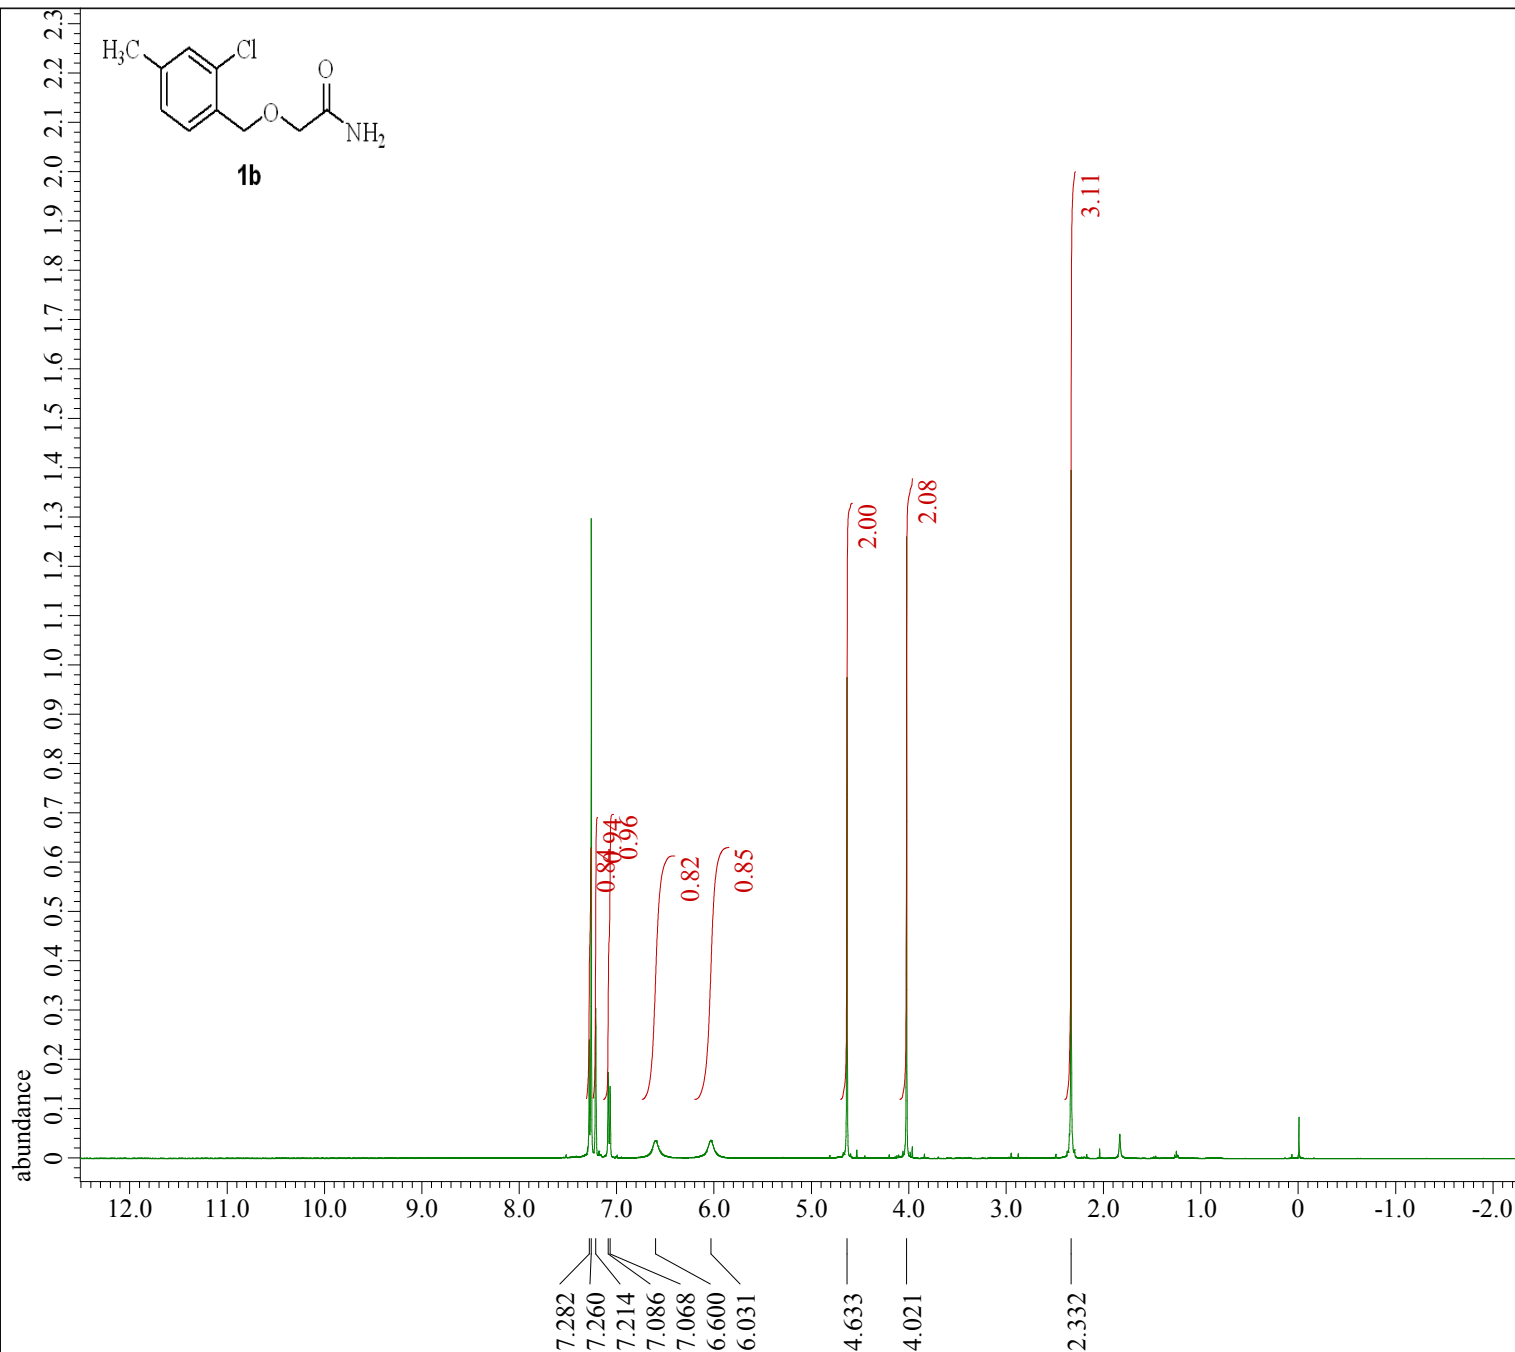

X : parts per Million : Proton

---- PROCESSING PARAMETERS ----  
sexp( 0.2[Hz], 0.0[s] )  
trapezoid( 0[%], 0[%], 80[%], 100[%] )  
zerofill( 1 )  
fft( 1, TRUE, TRUE )  
machinephase  
ppm

Derived from: LK1105-3\_Proton-1-1.jdf

Filename = LK1105-3\_Proton-1-3.j  
Author = delta  
Experiment = proton.jxp  
Sample Id = LK1105-3  
Solvent = CHLOROFORM-D  
Actual\_Start\_Time = 5-NOV-2016 21:23:20  
Revision\_Time = 8-AUG-2017 16:31:53

Comment = single\_pulse  
Data\_Format = 1D\_COMPLEX  
Dim\_Size = 13107  
Dim\_Title = Proton  
Dim\_Units = [ppm]  
Dimensions = X  
Spectrometer = JNM-ECZ400S/L1

Field\_Strength = 9.389766[T] (400[MHz])  
X\_Acq\_Duration = 2.18628096[s]  
X\_Domain = 1H  
X\_Freq = 399.78219838[MHz]  
X\_Offset = 5[ppm]  
X\_Points = 16384  
X\_Prescans = 1  
X\_Resolution = 0.45739775[Hz]  
X\_Sweep = 7.4940048[kHz]  
X\_Sweep\_Clippped = 5.99520384[kHz]  
Irr\_Domain = Proton  
Irr\_Freq = 399.78219838[MHz]  
Irr\_Offset = 5[ppm]  
Tri\_Domain = Proton  
Tri\_Freq = 399.78219838[MHz]  
Tri\_Offset = 5[ppm]  
Clipped = FALSE  
Scans = 8  
Total\_Scans = 8

Relaxation\_Delay = 5[s]  
Recvr\_Gain = 46  
Temp\_Get = 17.9[dC]  
X\_90\_Width = 9.5[us]  
X\_Acq\_Time = 2.18628096[s]  
X\_Angle = 45[deg]  
X\_Atn = 2[dB]  
X\_Pulse = 4.75[us]  
Irr\_Mode = Off  
Tri\_Mode = Off  
Dante\_Loop = 500  
Dante\_Presat = FALSE

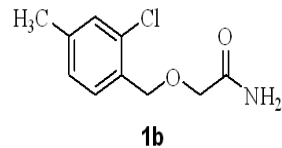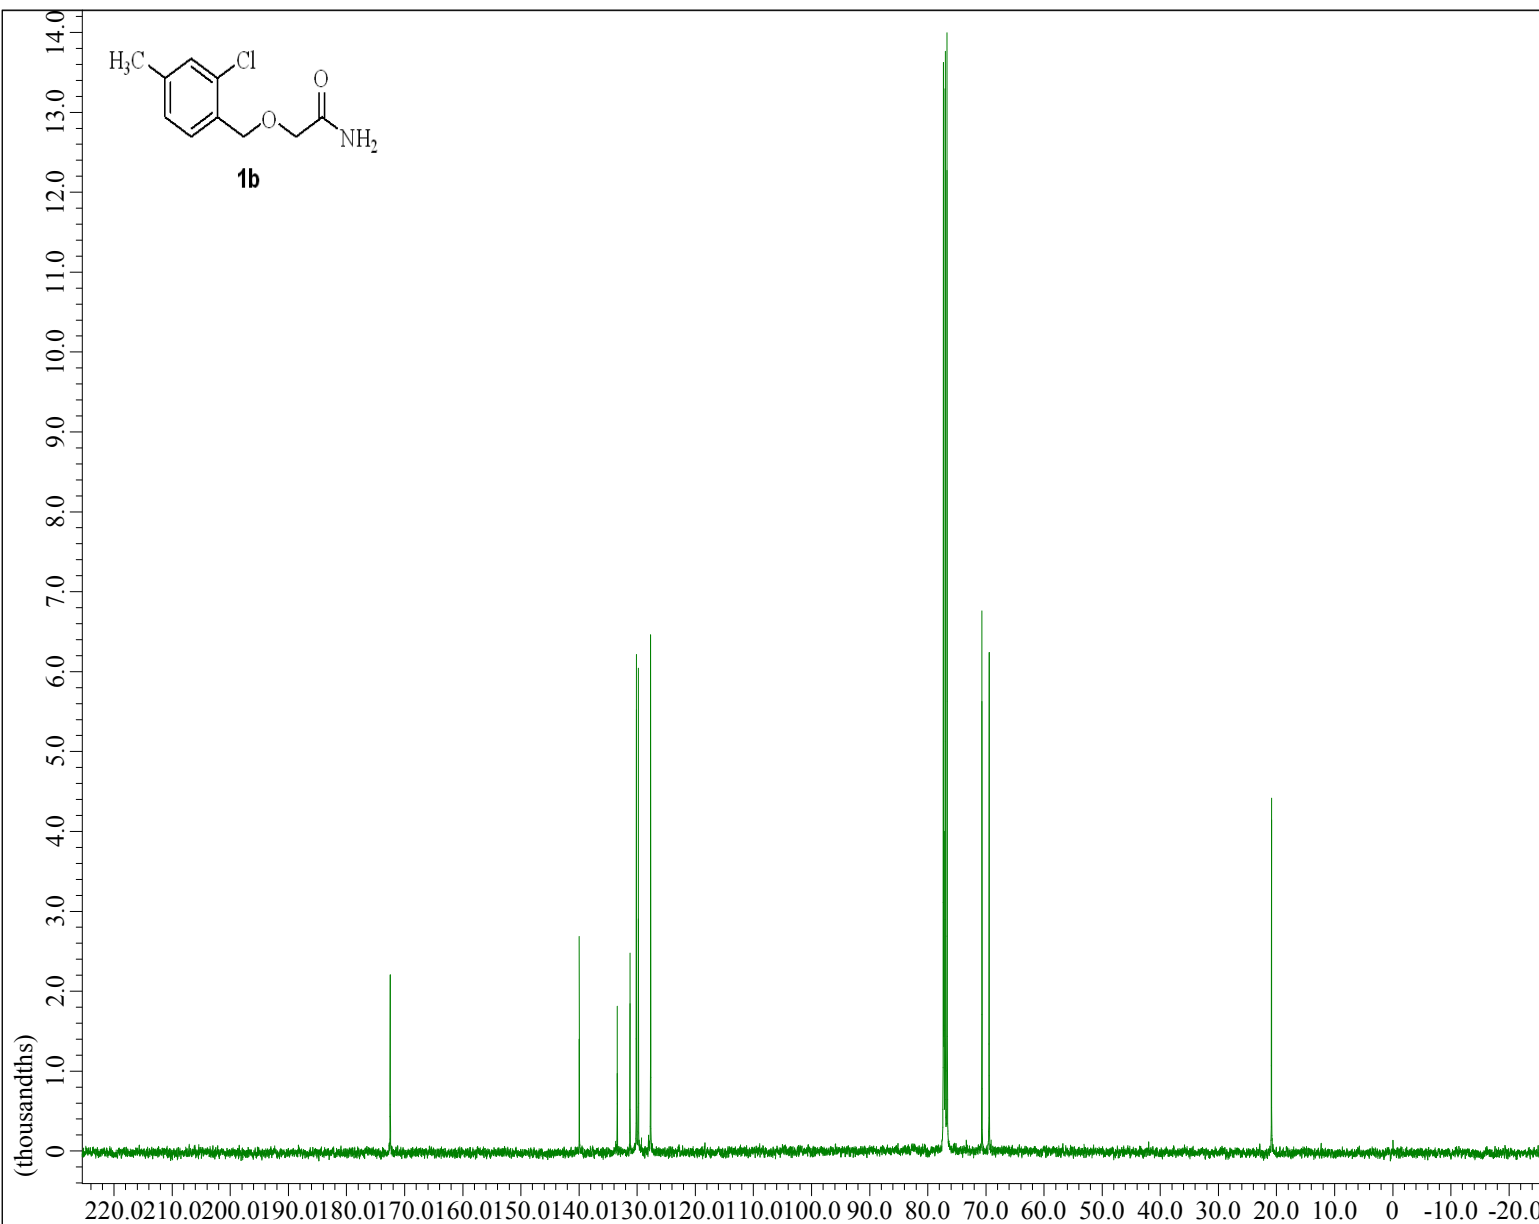

X : parts per Million : Carbon13

---- PROCESSING PARAMETERS ----  
sexp( 2.0[Hz], 0.0[s] )  
trapezoid( 0[%], 0[%], 80[%], 100[%] )  
zerofill( 1 )  
fft( 1, TRUE, TRUE )  
machinephase  
ppm  
Derived from: LK1105-3\_Carbon-1-1.jdf

|                          |                      |
|--------------------------|----------------------|
| Filename                 | = LK1105-3_Carbon-1- |
| Author                   | = delta              |
| Experiment               | = carbon.jxp         |
| Sample Id                | = LK1105-3           |
| Solvent                  | = CHLOROFORM-D       |
| Actual_Start_Time        | = 6-NOV-2016 09:38:  |
| Revision_Time            | = 8-AUG-2017 16:29:  |
| Comment                  | = single pulse decou |
| Data_Format              | = 1D COMPLEX         |
| Dim_Size                 | = 26214              |
| Dim_Title                | = Carbon13           |
| Dim_Units                | = [ppm]              |
| Dimensions               | = X                  |
| Spectrometer             | = JNM-ECZ400S/L1     |
| Field_Strength           | = 9.389766[T] (400[M |
| X_Acq_Duration           | = 1.03809024[s]      |
| X_Domain                 | = 13C                |
| X_Freq                   | = 100.52530333[MHz]  |
| X_Offset                 | = 100[ppm]           |
| X_Points                 | = 32768              |
| X_Prescans               | = 4                  |
| X_Resolution             | = 0.96330739[Hz]     |
| X_Sweep                  | = 31.56565657[kHz]   |
| X_Sweep_Clipped          | = 25.25252525[kHz]   |
| Irr_Domain               | = Proton             |
| Irr_Freq                 | = 399.78219838[MHz]  |
| Irr_Offset               | = 5[ppm]             |
| Clipped                  | = FALSE              |
| Scans                    | = 1024               |
| Total_Scans              | = 1024               |
| Relaxation_Delay         | = 2[s]               |
| Recvr_Gain               | = 50                 |
| Temp_Get                 | = 18.5[dC]           |
| X_90_Width               | = 8.8[us]            |
| X_Acq_Time               | = 1.03809024[s]      |
| X_Angle                  | = 30[deg]            |
| X_Atn                    | = 3.4[dB]            |
| X_Pulse                  | = 2.93333333[us]     |
| Irr_Atn_Dec              | = 23.66[dB]          |
| Irr_Atn_Dec_Calc         | = 23.66[dB]          |
| Irr_Atn_Dec_Default_Calc | = 23.66[dB]          |
| Irr_Atn_No               | = 23.66[dB]          |
| Irr_Dec_Bandwidth_Hz     | = 4.7826087[kHz]     |
| Irr_Dec_Bandwidth_Ppm    | = 11.96303566[ppm]   |
| Irr_Dec_Freq             | = 399.78219838[MHz]  |



---- PROCESSING PARAMETERS ----

```
sexp( 0.2[Hz], 0.0[s] )
trapezoid( 0[%], 0[%], 80[%], 100[%] )
zerofill( 1 )
fft( 1, TRUE, TRUE )
machinephase
ppm
```

Derived from: LK1128-01\_Proton-1-1.jdf

```
Filename      = LK1128-01_Proton-1-3.
Author       = delta
Experiment   = proton.jxp
Sample Id    = LK1128-01
Solvent      = CHLOROFORM-D
Actual_Start_Time = 28-NOV-2016 16:34:02
Revision_Time   = 8-AUG-2017 16:44:32
```

```
Comment      = single_pulse
Data_Format  = 1D COMPLEX
Dim_Size     = 13107
Dim_Title    = Proton
Dim_Units    = [ppm]
Dimensions   = X
Spectrometer = JNM-ECZ400S/L1
```

```
Field_Strength = 9.389766[T] (400[MHz])
X_Acq_Duration = 2.18628096[s]
X_Domain       = 1H
X_Freq         = 399.78219838[MHz]
X_Offset       = 5[ppm]
X_Points       = 16384
X_Prescans     = 1
X_Resolution   = 0.45739775[Hz]
X_Sweep        = 7.4940048[kHz]
X_Sweep_Clippped = 5.99520384[kHz]
Irr_Domain     = Proton
Irr_Freq       = 399.78219838[MHz]
Irr_Offset     = 5[ppm]
Tri_Domain     = Proton
Tri_Freq       = 399.78219838[MHz]
Tri_Offset     = 5[ppm]
Clipped        = FALSE
Scans          = 8
Total_Scans    = 8
```

```
Relaxation_Delay = 5[s]
Recvr_Gain       = 46
Temp_Get         = 26.4[dC]
X_90_Width       = 9.5[us]
X_Acq_Time       = 2.18628096[s]
X_Angle          = 45[deg]
X_Atn            = 2[dB]
X_Pulse          = 4.75[us]
Irr_Mode         = Off
Tri_Mode         = Off
Dante_Loop       = 500
Dante_Presat     = FALSE
```

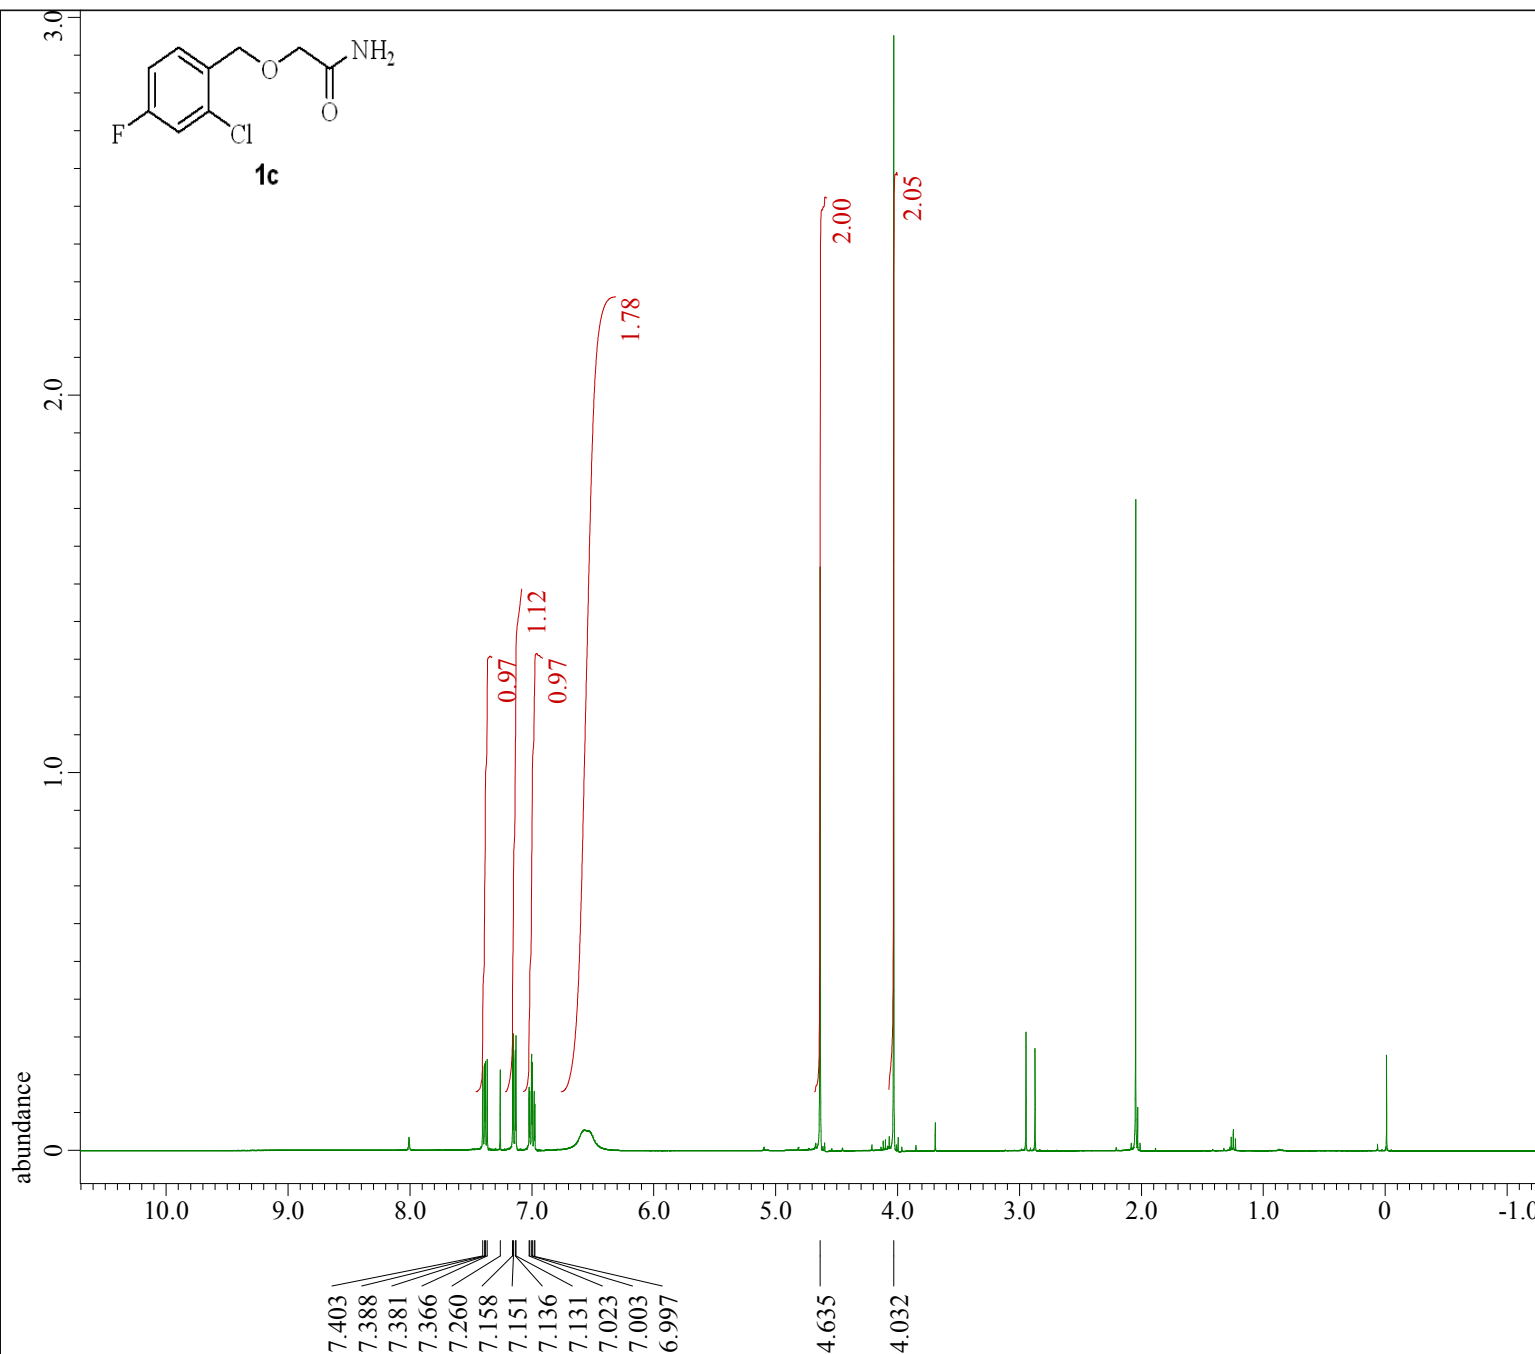

X : parts per Million : Proton

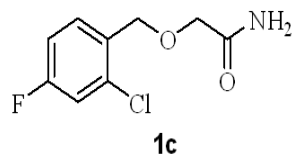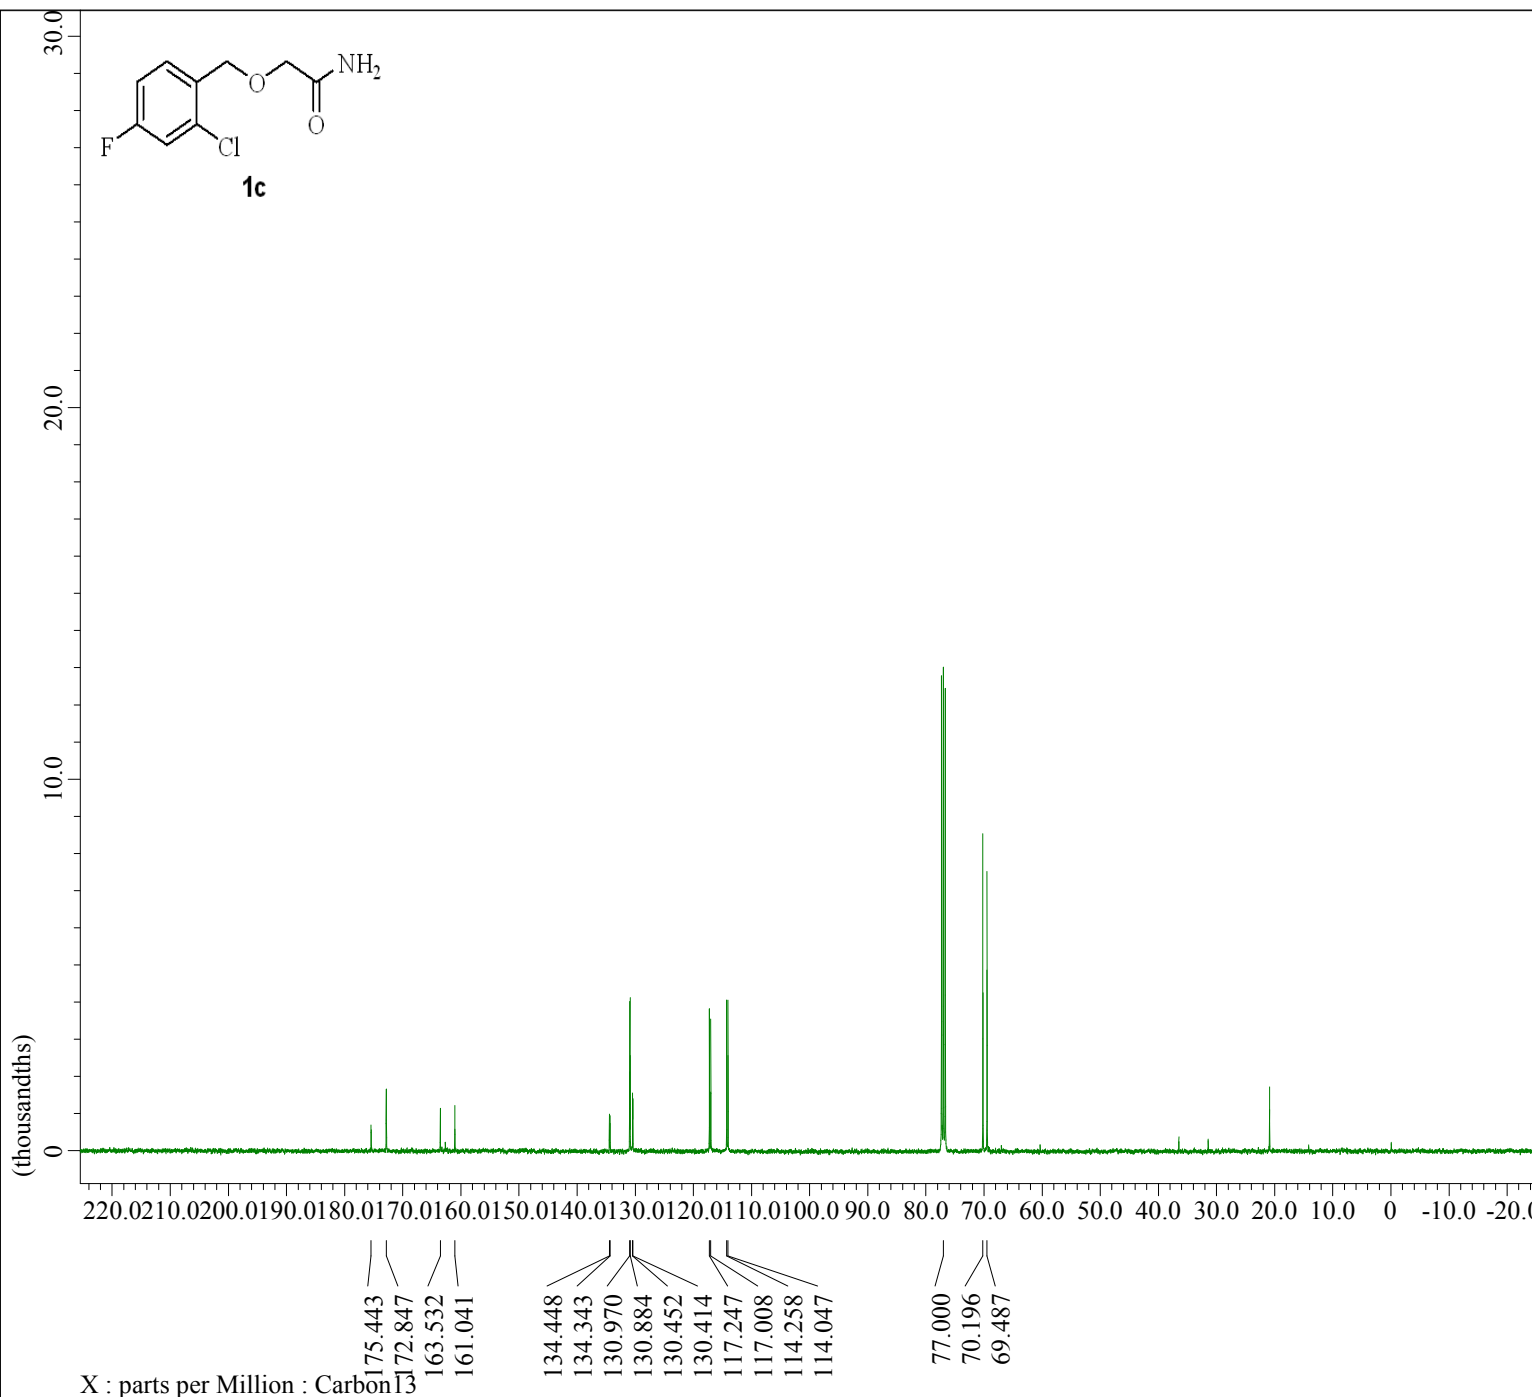

---- PROCESSING PARAMETERS ----  
sexp( 2.0[Hz], 0.0[s] )  
trapezoid( 0[%], 0[%], 80[%], 100[%] )  
zerofill( 1 )  
fft( 1, TRUE, TRUE )  
machinephase  
ppm

Derived from: LK1128-01\_Carbon-1-1.jdf

Filename = LK1128-01\_Carbon-1  
Author = delta  
Experiment = carbon.jxp  
Sample Id = LK1128-01  
Solvent = CHLOROFORM-D  
Actual\_Start\_Time = 28-NOV-2016 17:29:  
Revision\_Time = 8-AUG-2017 16:51:

Comment = single pulse decou  
Data\_Format = 1D COMPLEX  
Dim\_Size = 26214  
Dim\_Title = Carbon13  
Dim\_Units = [ppm]  
Dimensions = X  
Spectrometer = JNM-ECZ400S/L1

Field\_Strength = 9.389766[T] (400[M  
X\_Acq\_Duration = 1.03809024[s]  
X\_Domain = 13C  
X\_Freq = 100.52530333[MHz]  
X\_Offset = 100[ppm]  
X\_Points = 32768  
X\_Prescans = 4  
X\_Resolution = 0.96330739[Hz]  
X\_Sweep = 31.56565657[kHz]  
X\_Sweep\_Clipped = 25.25252525[kHz]  
Irr\_Domain = Proton  
Irr\_Freq = 399.78219838[MHz]  
Irr\_Offset = 5[ppm]  
Clipped = FALSE  
Scans = 1024  
Total\_Scans = 1024

Relaxation\_Delay = 2[s]  
Recvr\_Gain = 50  
Temp\_Get = 27.6[dC]  
X\_90\_Width = 8.8[us]  
X\_Acq\_Time = 1.03809024[s]  
X\_Angle = 30[deg]  
X\_Atn = 3.4[dB]  
X\_Pulse = 2.93333333[us]  
Irr\_Atn\_Dec = 23.66[dB]  
Irr\_Atn\_Dec\_Calc = 23.66[dB]  
Irr\_Atn\_Dec\_Default\_Calc = 23.66[dB]  
Irr\_Atn\_Noec = 23.66[dB]  
Irr\_Dec\_Bandwidth\_Hz = 4.7826087[kHz]  
Irr\_Dec\_Bandwidth\_Ppm = 11.96303566[ppm]  
Irr\_Dec\_Freq = 399.78219838[MHz]



---- PROCESSING PARAMETERS ----

```
sxpc( 0.2[Hz], 0.0[s] )  
trapezoid( 0[%], 0[%], 80[%], 100[%] )  
zerofill( 1 )  
fft( 1, TRUE, TRUE )  
machinephase  
ppm
```

Derived from: LK1128-01\_single\_pulse-1-1.jdf

```
Filename      = LK1128-01_single_puls  
Author        = delta  
Experiment    = single_pulse.jxp  
Sample_Id     = LK1128-01  
Solvent       = CHLOROFORM-D  
Actual_Start_Time = 28-NOV-2016 17:26:53  
Revision_Time  = 8-AUG-2017 16:59:42
```

```
Comment       = single_pulse  
Data_Format   = 1D COMPLEX  
Dim_Size      = 13107  
Dim_Title     = Fluorine19  
Dim_Units     = [ppm]  
Dimensions    = X  
Spectrometer  = JNM-ECZ400S/L1
```

```
Field_Strength = 9.389766[T] (400[MHz])  
X_Acq_Duration = 83.88608[ms]  
X_Domain       = 19F  
X_Freq         = 376.17105393[MHz]  
X_Offset       = -100[ppm]  
X_Points       = 16384  
X_Prescans     = 1  
X_Resolution   = 11.92092896[Hz]  
X_Sweep        = 195.3125[kHz]  
X_Sweep_Clippped = 156.25[kHz]  
Irr_Domain     = Fluorine19  
Irr_Freq       = 376.17105393[MHz]  
Irr_Offset     = 5[ppm]  
Tri_Domain     = Fluorine19  
Tri_Freq       = 376.17105393[MHz]  
Tri_Offset     = 5[ppm]  
Clipped        = FALSE  
Scans          = 8  
Total_Scans    = 8
```

```
Relaxation_Delay = 5[s]  
Recvr_Gain       = 50  
Temp_Get         = 27.2[dc]  
X_90_Width       = 10[us]  
X_Acq_Time       = 83.88608[ms]  
X_Angle          = 45[deg]  
X_Atn            = 0.9[dB]  
X_Pulse          = 5[us]  
Irr_Mode         = Off  
Tri_Mode         = Off  
Dante_Loop       = 500  
Dante_Presat     = FALSE
```

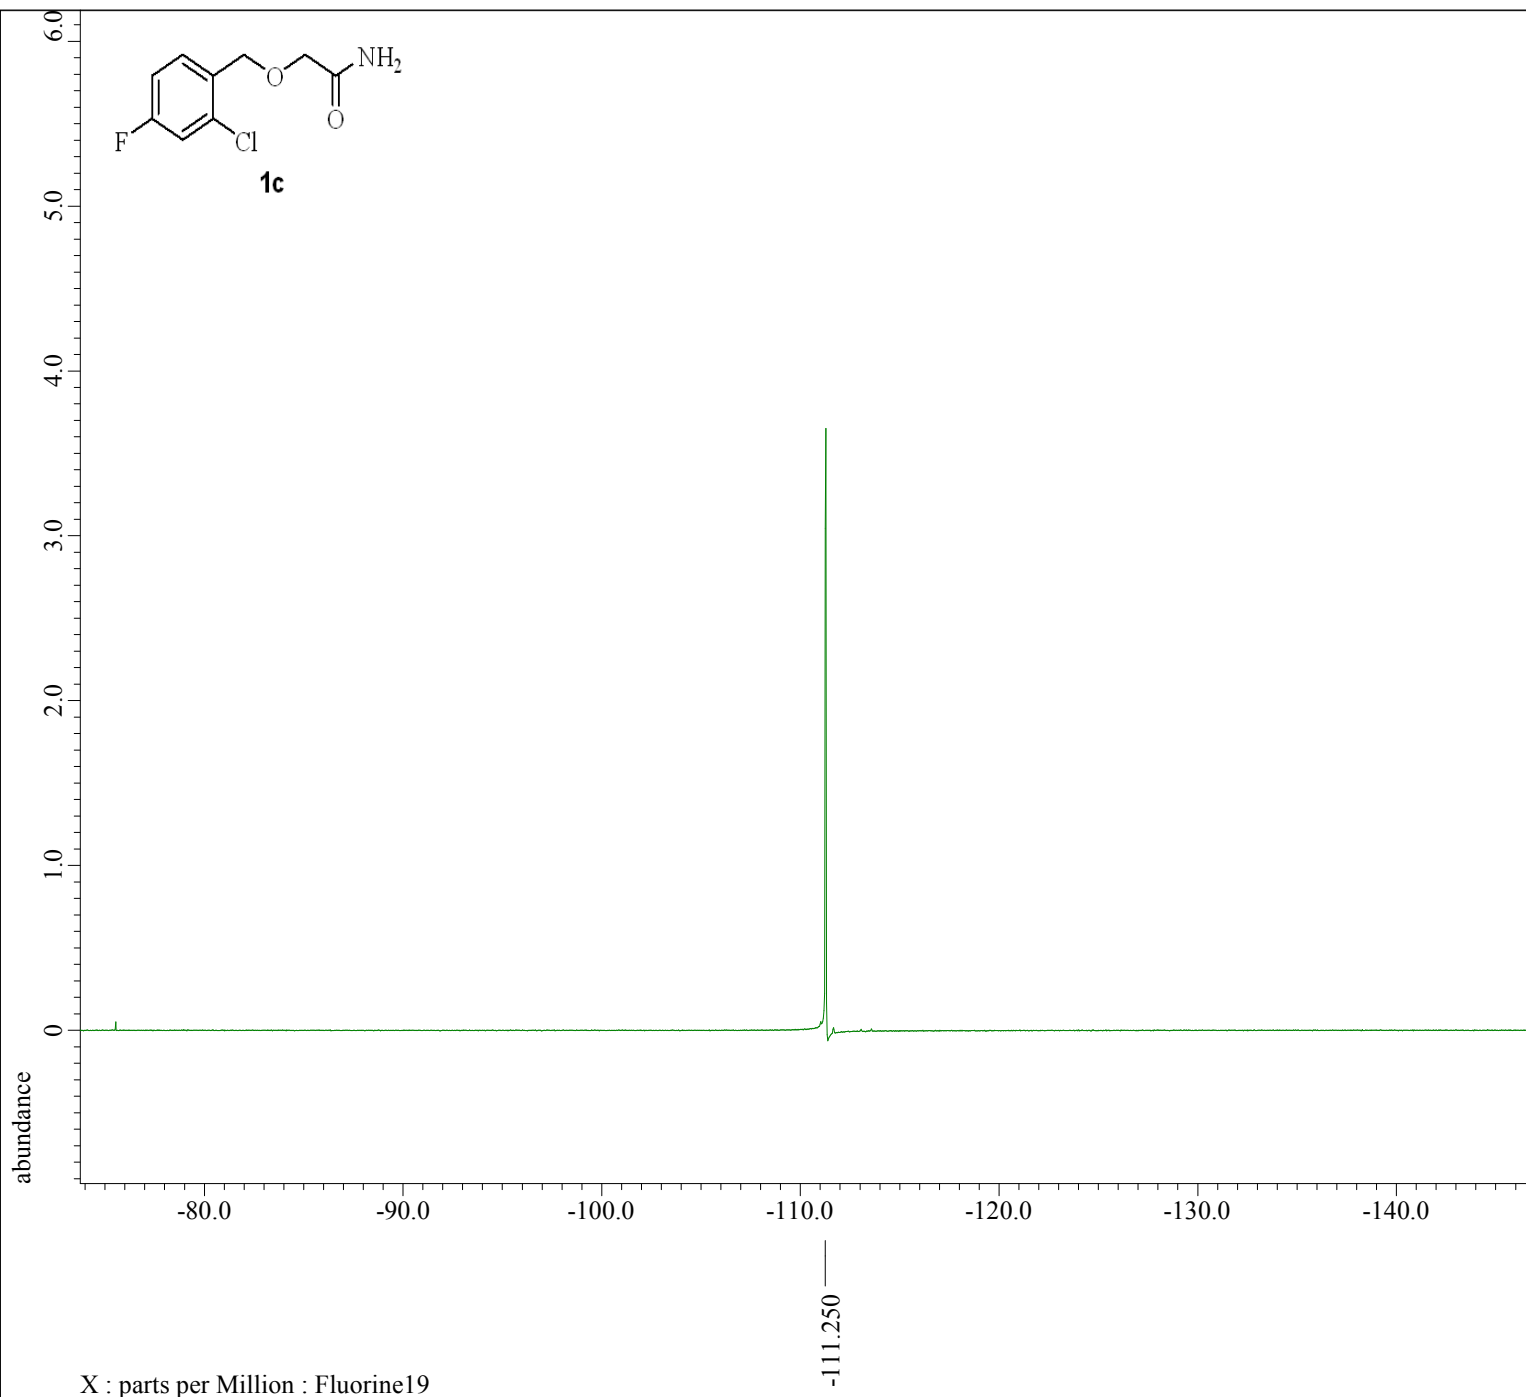



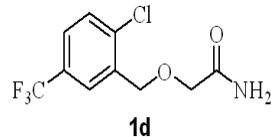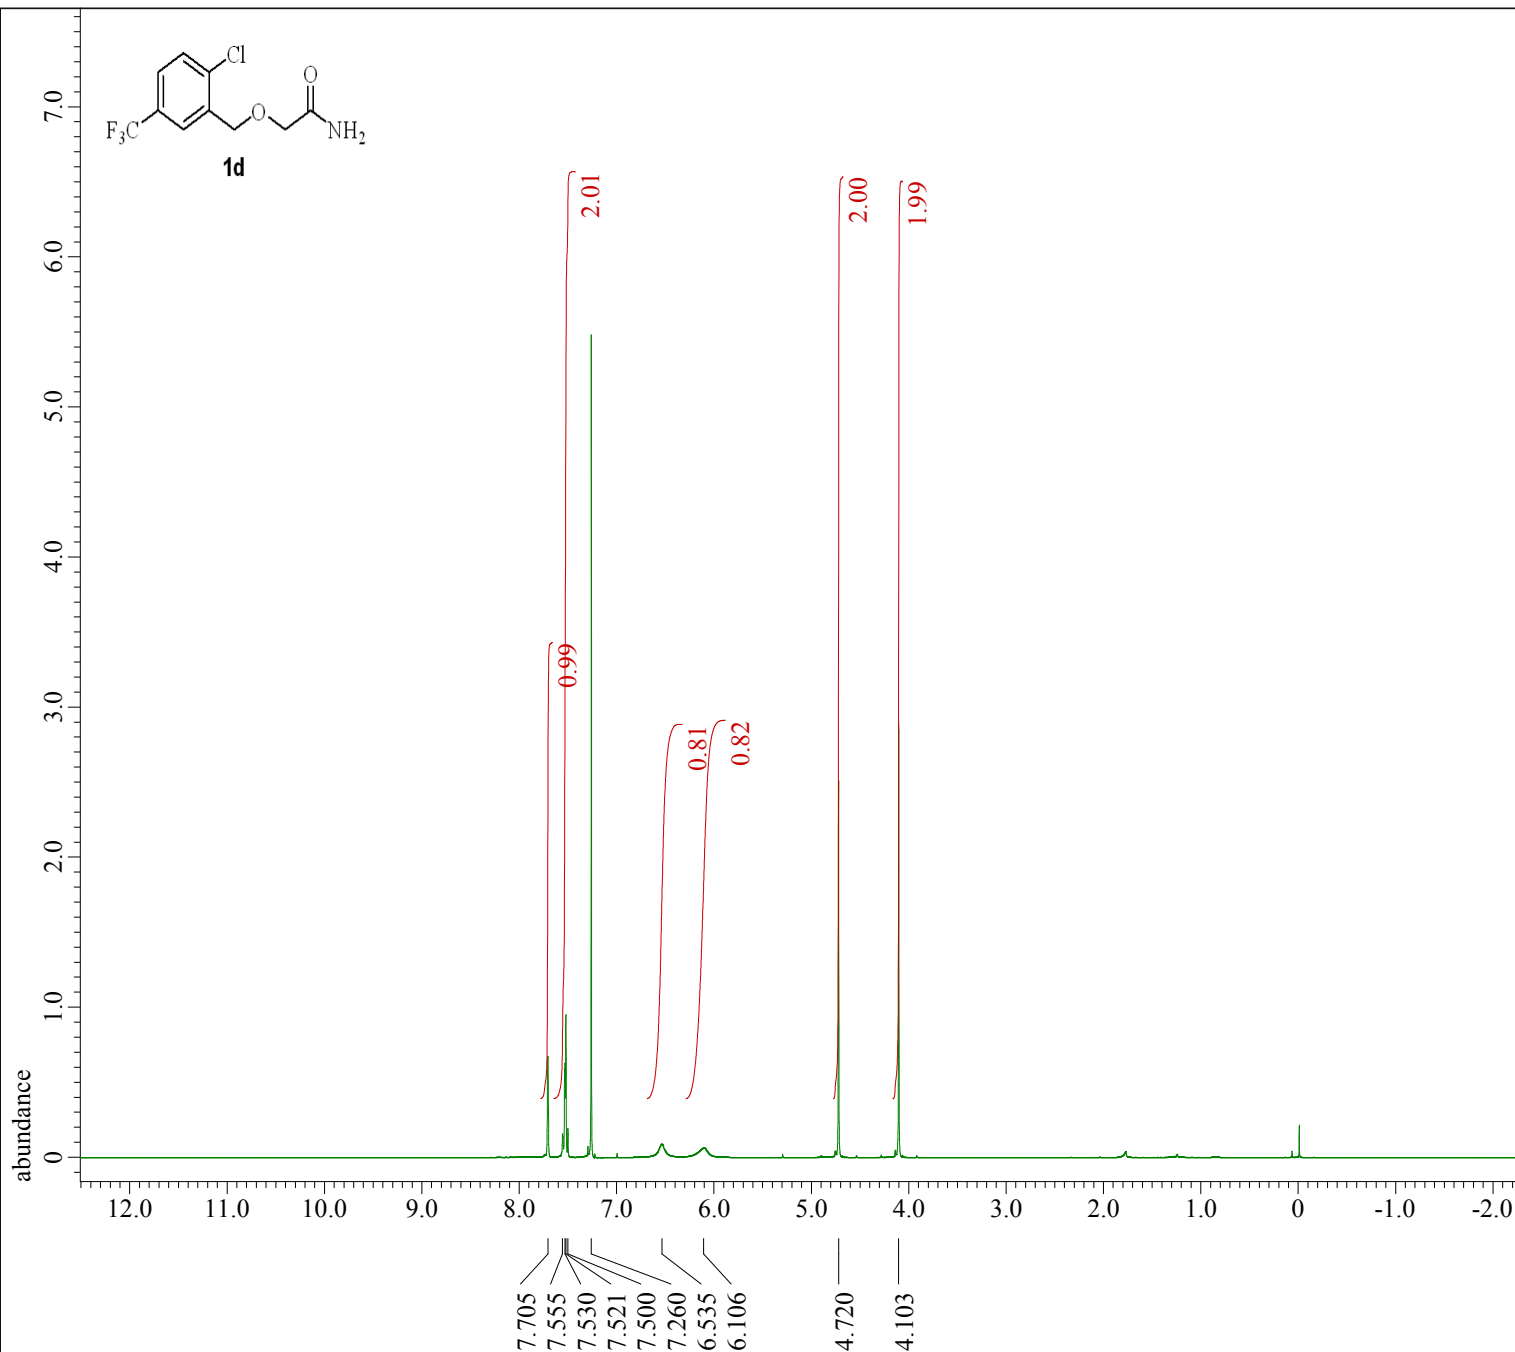

X : parts per Million : Proton

---- PROCESSING PARAMETERS ----  
sexp( 0.2[Hz], 0.0[s] )  
trapezoid( 0[%], 0[%], 80[%], 100[%] )  
zerofill( 1 )  
fft( 1, TRUE, TRUE )  
machinephase  
ppm

Derived from: LK1104-01\_Proton-1-1.jdf

Filename = LK1104-01\_Proton-1-6.  
Author = delta  
Experiment = proton.jxp  
Sample Id = LK1104-01  
Solvent = CHLOROFORM-D  
Actual\_Start\_Time = 14-NOV-2016 12:18:30  
Revision\_Time = 8-AUG-2017 17:35:18

Comment = single\_pulse  
Data\_Format = 1D COMPLEX  
Dim\_Size = 13107  
Dim\_Title = Proton  
Dim\_Units = [ppm]  
Dimensions = X  
Spectrometer = JNM-ECZ400S/L1

Field\_Strength = 9.389766[T] (400[MHz])  
X\_Acq\_Duration = 2.18628096[s]  
X\_Domain = 1H  
X\_Freq = 399.78219838[MHz]  
X\_Offset = 5[ppm]  
X\_Points = 16384  
X\_Prescans = 1  
X\_Resolution = 0.45739775[Hz]  
X\_Sweep = 7.4940048[kHz]  
X\_Sweep\_Clippped = 5.99520384[kHz]  
Irr\_Domain = Proton  
Irr\_Freq = 399.78219838[MHz]  
Irr\_Offset = 5[ppm]  
Tri\_Domain = Proton  
Tri\_Freq = 399.78219838[MHz]  
Tri\_Offset = 5[ppm]  
Clipped = FALSE  
Scans = 8  
Total\_Scans = 8

Relaxation\_Delay = 5[s]  
Recvr\_Gain = 56  
Temp\_Get = 16.8[dC]  
X\_90\_Width = 9.5[us]  
X\_Acq\_Time = 2.18628096[s]  
X\_Angle = 45[deg]  
X\_Atn = 2[dB]  
X\_Pulse = 4.75[us]  
Irr\_Mode = Off  
Tri\_Mode = Off  
Dante\_Loop = 500  
Dante\_Presat = FALSE

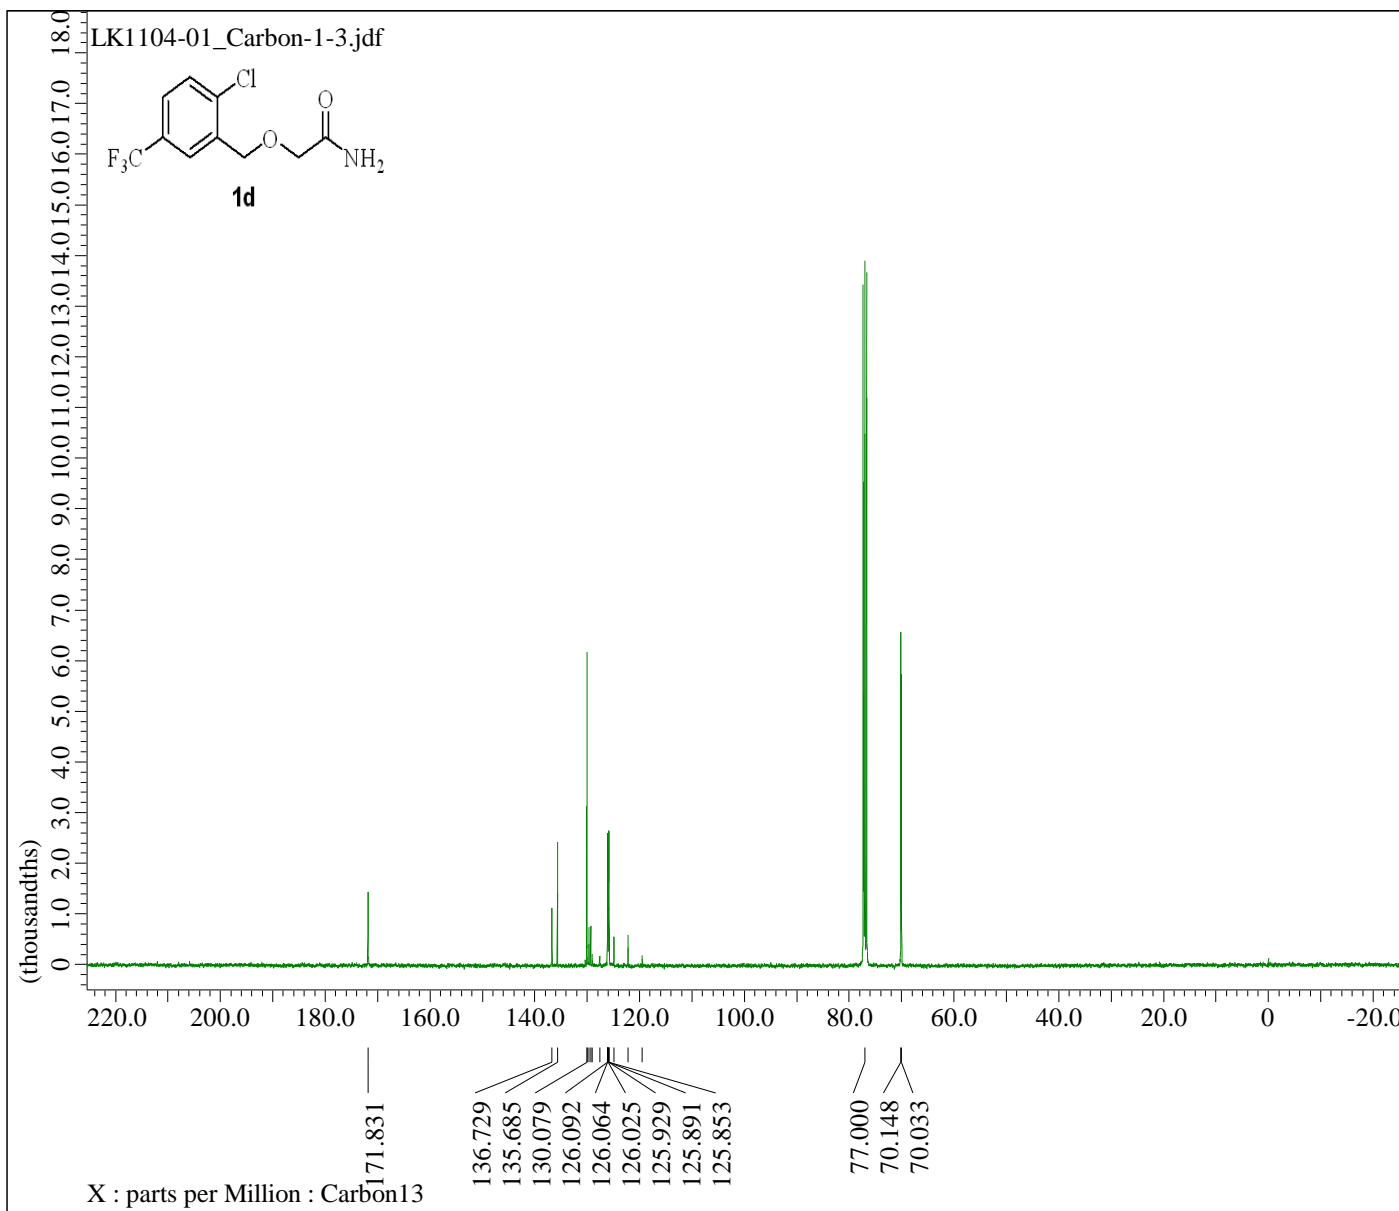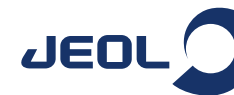

```

---- PROCESSING PARAMETERS ----
sexp( 2.0[Hz], 0.0[s] )
trapezoid( 0[%], 0[%], 80[%], 100[%] )
zerofill( 1 )
fft( 1, TRUE, TRUE )
machinephase
ppm

```

Derived from: LK1104-01\_Carbon-1-1.jdf

```

Filename      = LK1104-01_Carbon-1-3.jdf
Author       = delta
Experiment   = carbon.jxp
Sample_Id    = LK1104-01
Solvent      = CHLOROFORM-D
Actual_Start_Time = 14-NOV-2016 12:41:12
Revision_Time   = 8-AUG-2017 17:41:12

```

```

Comment      = single pulse de
Data_Format  = 1D COMPLEX
Dim_Size     = 26214
Dim_Title    = Carbon13
Dim_Units    = [ppm]
Dimensions   = X
Spectrometer = JNM-ECZ400S/L1

```

```

Field_Strength = 9.389766[T] (400 MHz)
X_Acq_Duration = 1.03809024[s]
X_Domain       = 13C
X_Freq         = 100.52530333[MHz]
X_Offset       = 100[ppm]
X_Points       = 32768
X_Prescans     = 4
X_Resolution   = 0.96330739[Hz]
X_Sweep        = 31.56565657[kHz]
X_Sweep_Clipped = 25.25252525[kHz]
Irr_Domain     = Proton
Irr_Freq       = 399.78219838[MHz]
Irr_Offset     = 5[ppm]
Clipped        = FALSE
Scans          = 2400
Total_Scans    = 2400

```

```

Relaxation_Delay = 2[s]
Recvr_Gain       = 50
Temp_Get         = 17.9[dC]
X_90_Width      = 8.[us]
X_Acq_Time       = 1.03809024[s]
X_Angle          = 30[deg]
X_Atn            = 3.4[dB]
X_Pulse          = 2.93333333[us]

```

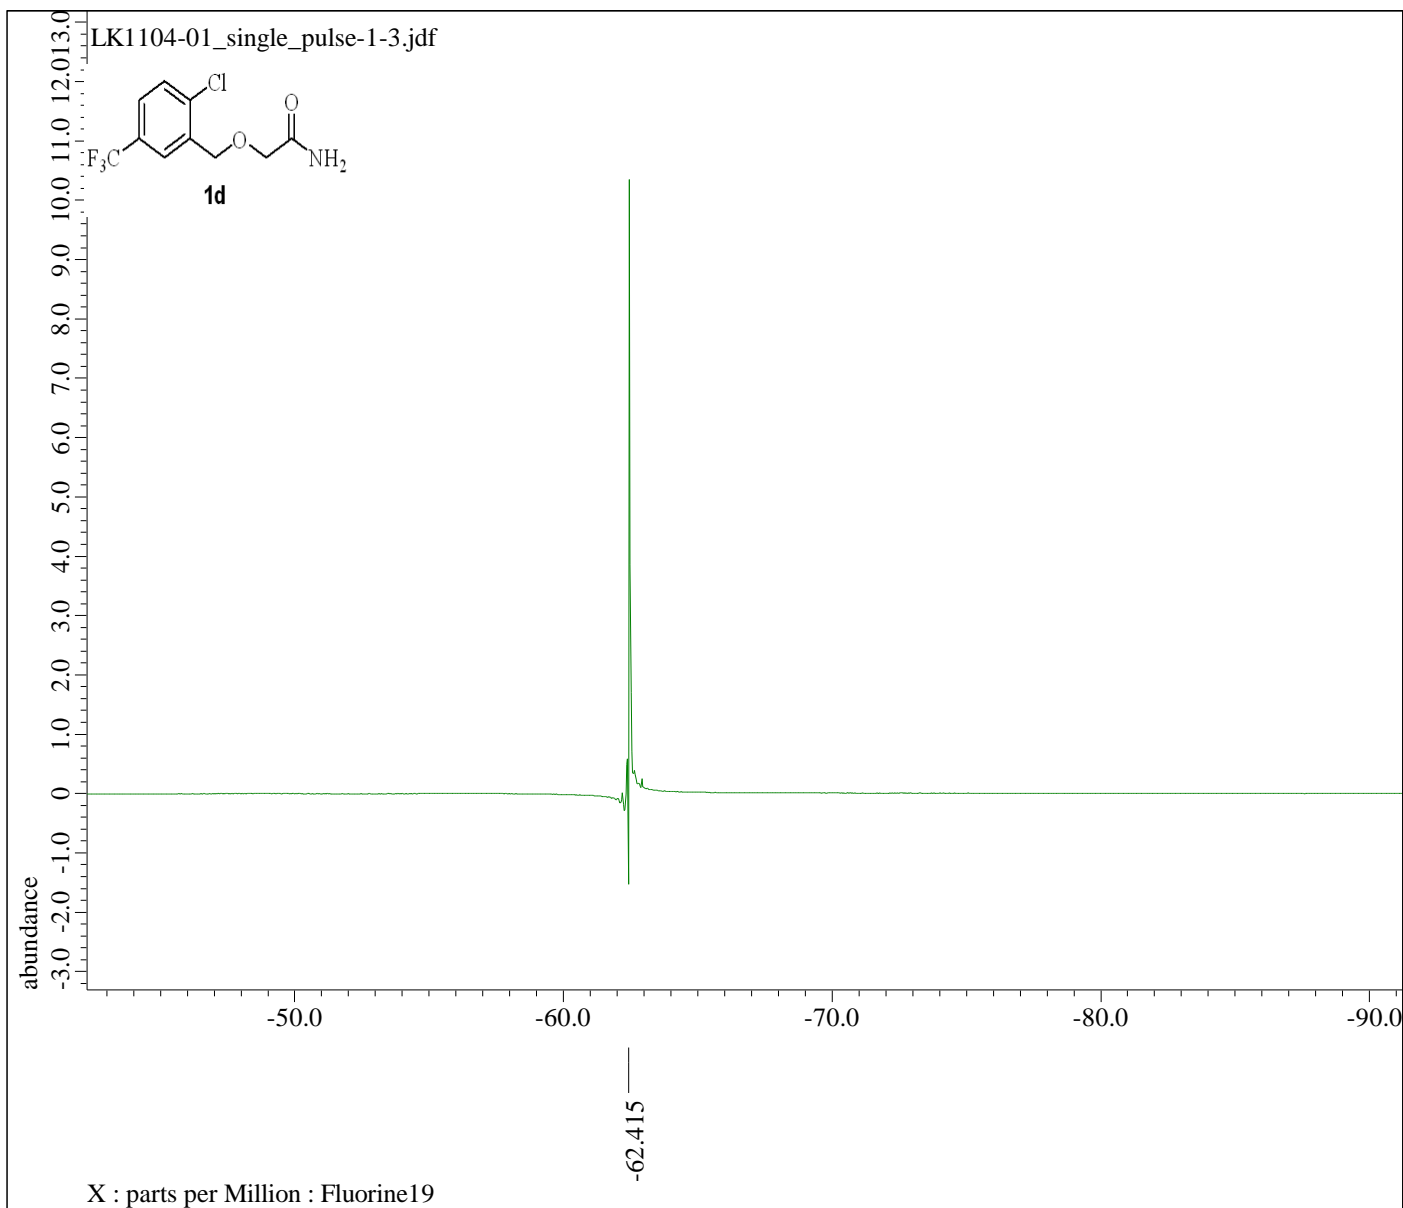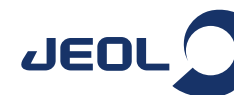

---- PROCESSING PARAMETERS ----

```
sexp( 0.2[Hz], 0.0[s] )
trapezoid( 0[%], 0[%], 80[%], 100[%] )
zerofill( 1 )
fft( 1, TRUE, TRUE )
machinephase
ppm
```

Derived from: LK1104-01\_single\_pulse-1-1.j

```
Filename      = LK1104-01_single_p
Author        = delta
Experiment    = single_pulse.jxp
Sample_Id     = LK1104-01
Solvent       = CHLOROFORM-D
Actual_Start_Time = 14-NOV-2016 12:32:
Revision_Time = 10-AUG-2017 16:09:
```

```
Comment       = single_pulse
Data_Format   = 1D COMPLEX
Dim_Size      = 13107
Dim_Title     = Fluorine19
Dim_Units     = [ppm]
Dimensions    = X
Spectrometer  = JNM-ECZ400S/L1
```

```
Field_Strength = 9.389766[T] (400[M
X_Acq_Duration = 83.88608[ms]
X_Domain       = 19F
X_Freq         = 376.17105393[MHz]
X_Offset       = -100[ppm]
X_Points       = 16384
X_Prescans     = 1
X_Resolution   = 11.92092896[Hz]
X_Sweep        = 195.3125[kHz]
X_Sweep_Clipped = 156.25[kHz]
Irr_Domain     = Fluorine19
Irr_Freq       = 376.17105393[MHz]
Irr_Offset     = 5[ppm]
Tri_Domain     = Fluorine19
Tri_Freq       = 376.17105393[MHz]
Tri_Offset     = 5[ppm]
Clipped        = FALSE
Scans          = 8
Total_Scans    = 8

Relaxation_Delay = 5[s]
Recvr_Gain       = 50
Temp_Get         = 17[dC]
X_90_Width      = 10[us]
X_Acq_Time      = 83.88608[ms]
```

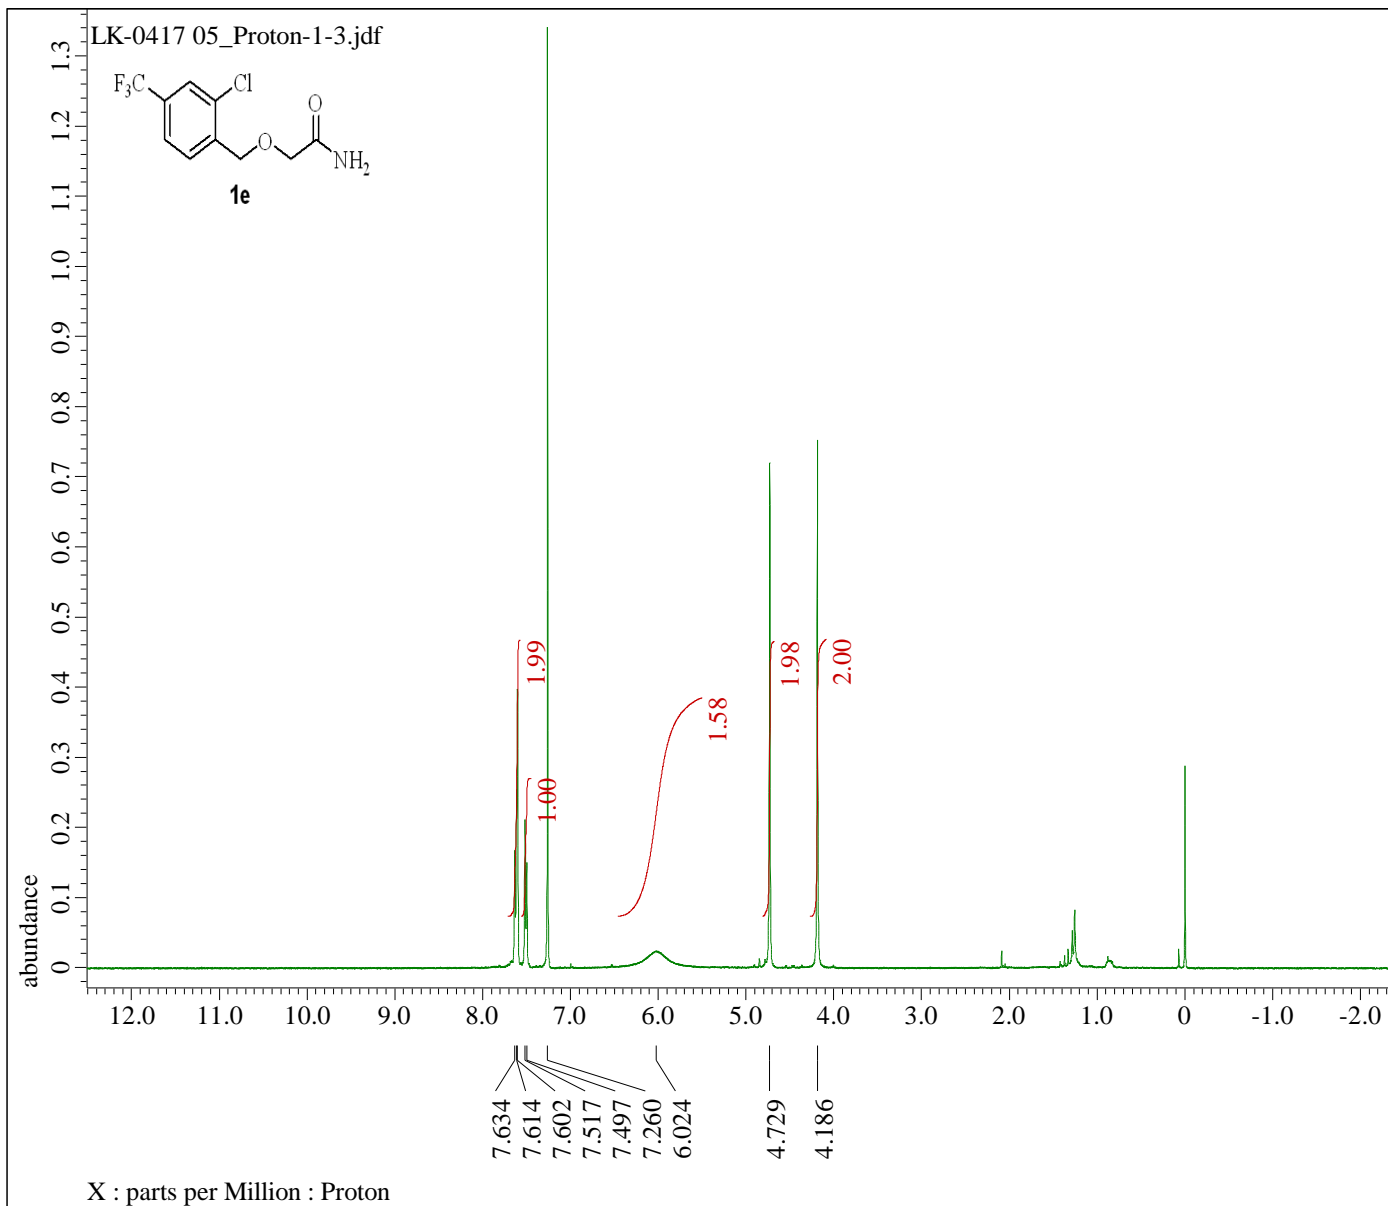

---- PROCESSING PARAMETERS ----  
 sexp( 0.2[Hz], 0.0[s] )  
 trapezoid( 0[%], 0[%], 80[%], 100[%] )  
 zerofill( 1 )  
 fft( 1, TRUE, TRUE )  
 machinephase  
 ppm

Derived from: LK-0417 05\_Proton-1-1.jdf

Filename = LK-0417 05\_Proton-1-1.jdf  
 Author = delta  
 Experiment = proton.jxp  
 Sample\_Id = LK-0417 05  
 Solvent = CHLOROFORM-D  
 Actual\_Start\_Time = 17-APR-2017 11:43:00  
 Revision\_Time = 9-AUG-2017 11:20:00

Comment = single\_pulse  
 Data\_Format = 1D COMPLEX  
 Dim\_Size = 13107  
 Dim\_Title = Proton  
 Dim\_Units = [ppm]  
 Dimensions = X  
 Spectrometer = JNM-ECZ400S/L1

Field\_Strength = 9.389766[T] (400[M])  
 X\_Acq\_Duration = 2.18628096[s]  
 X\_Domain = 1H  
 X\_Freq = 399.78219838[MHz]  
 X\_Offset = 5[ppm]  
 X\_Points = 16384  
 X\_Prescans = 1  
 X\_Resolution = 0.45739775[Hz]  
 X\_Sweep = 7.4940048[kHz]  
 X\_Sweep\_Clipped = 5.99520384[kHz]  
 Irr\_Domain = Proton  
 Irr\_Freq = 399.78219838[MHz]  
 Irr\_Offset = 5[ppm]  
 Tri\_Domain = Proton  
 Tri\_Freq = 399.78219838[MHz]  
 Tri\_Offset = 5[ppm]  
 Clipped = FALSE  
 Scans = 8  
 Total\_Scans = 8

Relaxation\_Delay = 5[s]  
 Recvr\_Gain = 66  
 Temp\_Get = 21.8[dC]  
 X\_90\_Width = 9.5[us]  
 X\_Acq\_Time = 2.18628096[s]

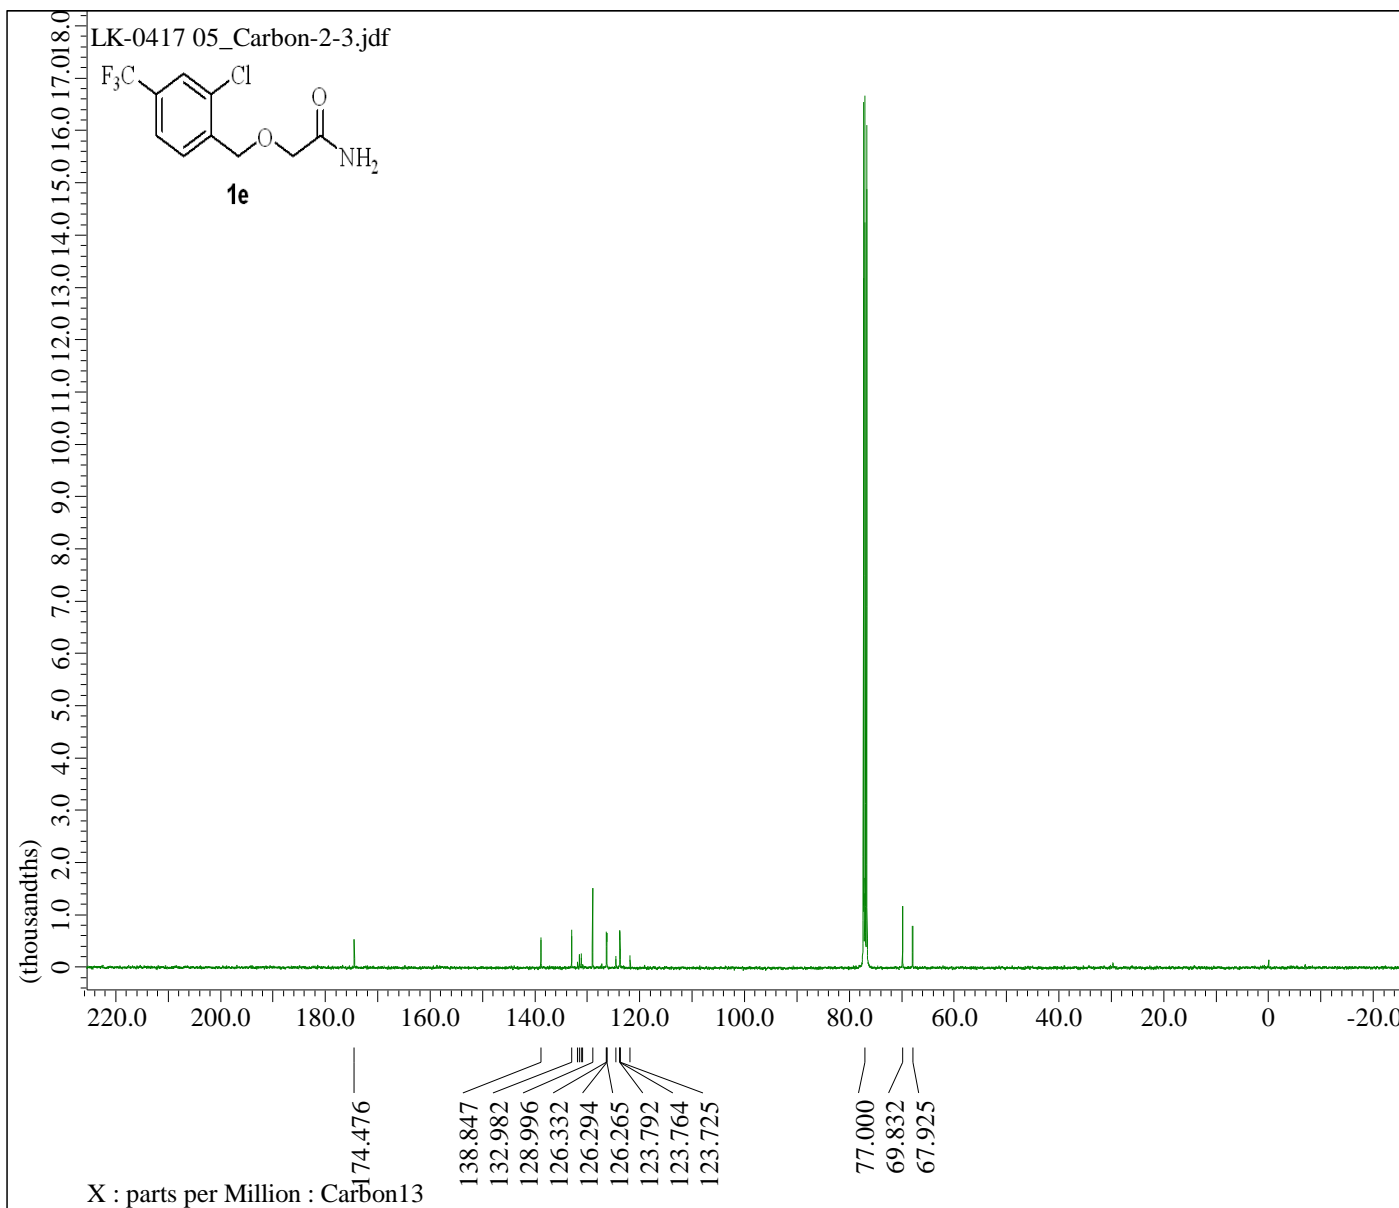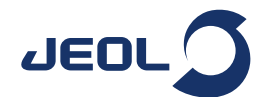

---- PROCESSING PARAMETERS ----  
 sexp( 2.0[Hz], 0.0[s] )  
 trapezoid( 0[%, 0[%, 80[%, 100[%] )  
 zerofill( 1 )  
 fft( 1, TRUE, TRUE )  
 machinephase  
 ppm  
 Derived from: LK-0417 05\_Carbon-2-1.jdf

Filename = LK-0417 05\_Carb  
 Author = delta  
 Experiment = carbon.jxp  
 Sample\_Id = LK-0417 05  
 Solvent = CHLOROFORM-D  
 Actual\_Start\_Time = 17-APR-2017 12:  
 Revision\_Time = 9-AUG-2017 11:

Comment = single pulse de  
 Data\_Format = 1D COMPLEX  
 Dim\_Size = 26214  
 Dim\_Title = Carbon13  
 Dim\_Units = [ppm]  
 Dimensions = X  
 Spectrometer = JNM-ECZ400S/L1

Field\_Strength = 9.389766[T] (40  
 X\_Acq\_Duration = 1.03809024[s]  
 X\_Domain = 13C  
 X\_Freq = 100.52530333[MH  
 X\_Offset = 100[ppm]  
 X\_Points = 32768  
 X\_Prescans = 4  
 X\_Resolution = 0.96330739[Hz]  
 X\_Sweep = 31.56565657[kHz]  
 X\_Sweep\_Clipped = 25.25252525[kHz]  
 Irr\_Domain = Proton  
 Irr\_Freq = 399.78219838[MH  
 Irr\_Offset = 5[ppm]  
 Clipped = FALSE  
 Scans = 4800  
 Total\_Scans = 4800

Relaxation\_Delay = 2[s]  
 Recvr\_Gain = 50  
 Temp\_Get = 21.9[dC]  
 X\_90\_Width = 8.8[us]  
 X\_Acq\_Time = 1.03809024[s]  
 X\_Angle = 30[deg]  
 X\_Atn = 3.4[dB]  
 X\_Pulse = 2.93333333[us]

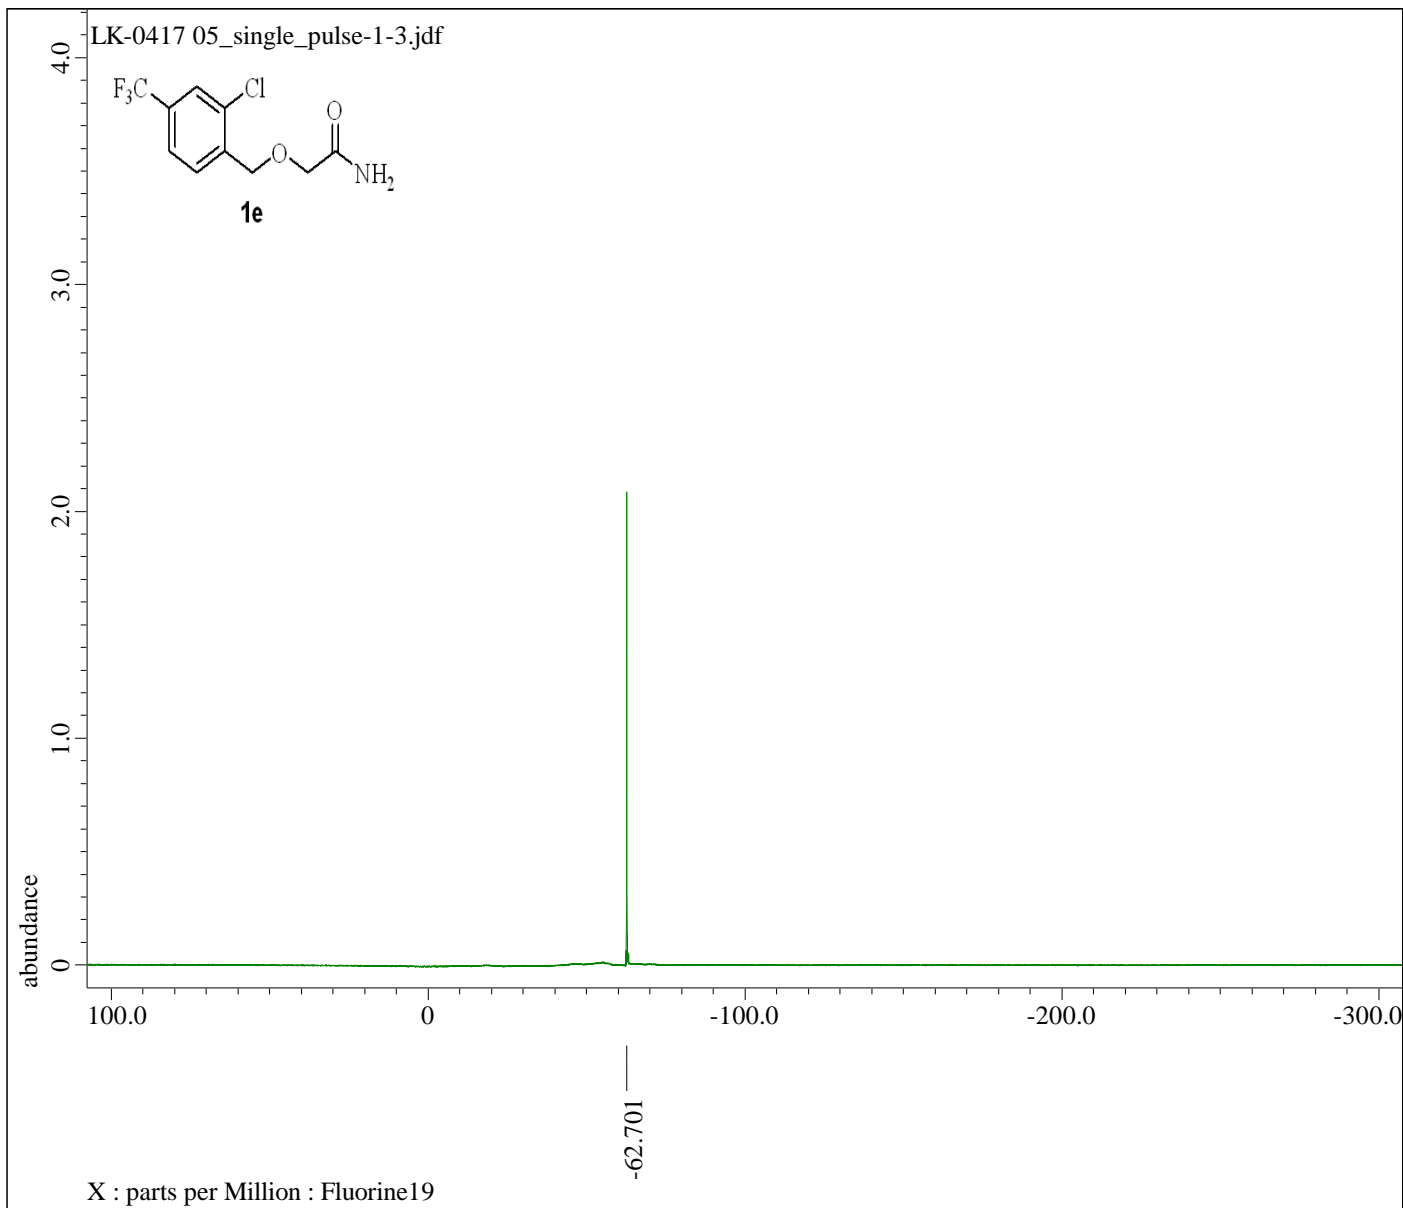

---- PROCESSING PARAMETERS ----

```
sexp( 0.2[Hz], 0.0[s] )
trapezoid( 0[%], 0[%], 80[%], 100[%] )
zerofill( 1 )
fft( 1, TRUE, TRUE )
machinephase
ppm
```

Derived from: LK-0417 05\_single\_pulse-1-1.

```
Filename      = LK-0417 05_single_
Author        = delta
Experiment    = single_pulse.jxp
Sample_Id     = LK-0417 05
Solvent       = CHLOROFORM-D
Actual_Start_Time = 17-APR-2017 11:44:
Revision_Time  = 9-AUG-2017 11:18:
```

```
Comment       = single_pulse
Data_Format   = 1D COMPLEX
Dim_Size      = 13107
Dim_Title     = Fluorine19
Dim_Units     = [ppm]
Dimensions    = X
Spectrometer  = JNM-ECZ400S/L1
```

```
Field_Strength = 9.389766[T] (400[M
X_Acq_Duration = 83.88608[ms]
X_Domain       = 19F
X_Freq         = 376.17105393[MHz]
X_Offset       = -100[ppm]
X_Points       = 16384
X_Prescans     = 1
X_Resolution   = 11.92092896[Hz]
X_Sweep        = 195.3125[kHz]
X_Sweep_Clipped = 156.25[kHz]
Irr_Domain     = Fluorine19
Irr_Freq       = 376.17105393[MHz]
Irr_Offset     = 5[ppm]
Tri_Domain     = Fluorine19
Tri_Freq       = 376.17105393[MHz]
Tri_Offset     = 5[ppm]
Clipped        = FALSE
Scans          = 8
Total_Scans    = 8
```

```
Relaxation_Delay = 5[s]
Recvr_Gain        = 50
Temp_Get          = 21.8[dC]
X_90_Width       = 10[us]
X_Acq_Time       = 83.88608[ms]
```



LK-030201\_Proton-2-3.jdf

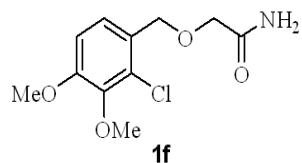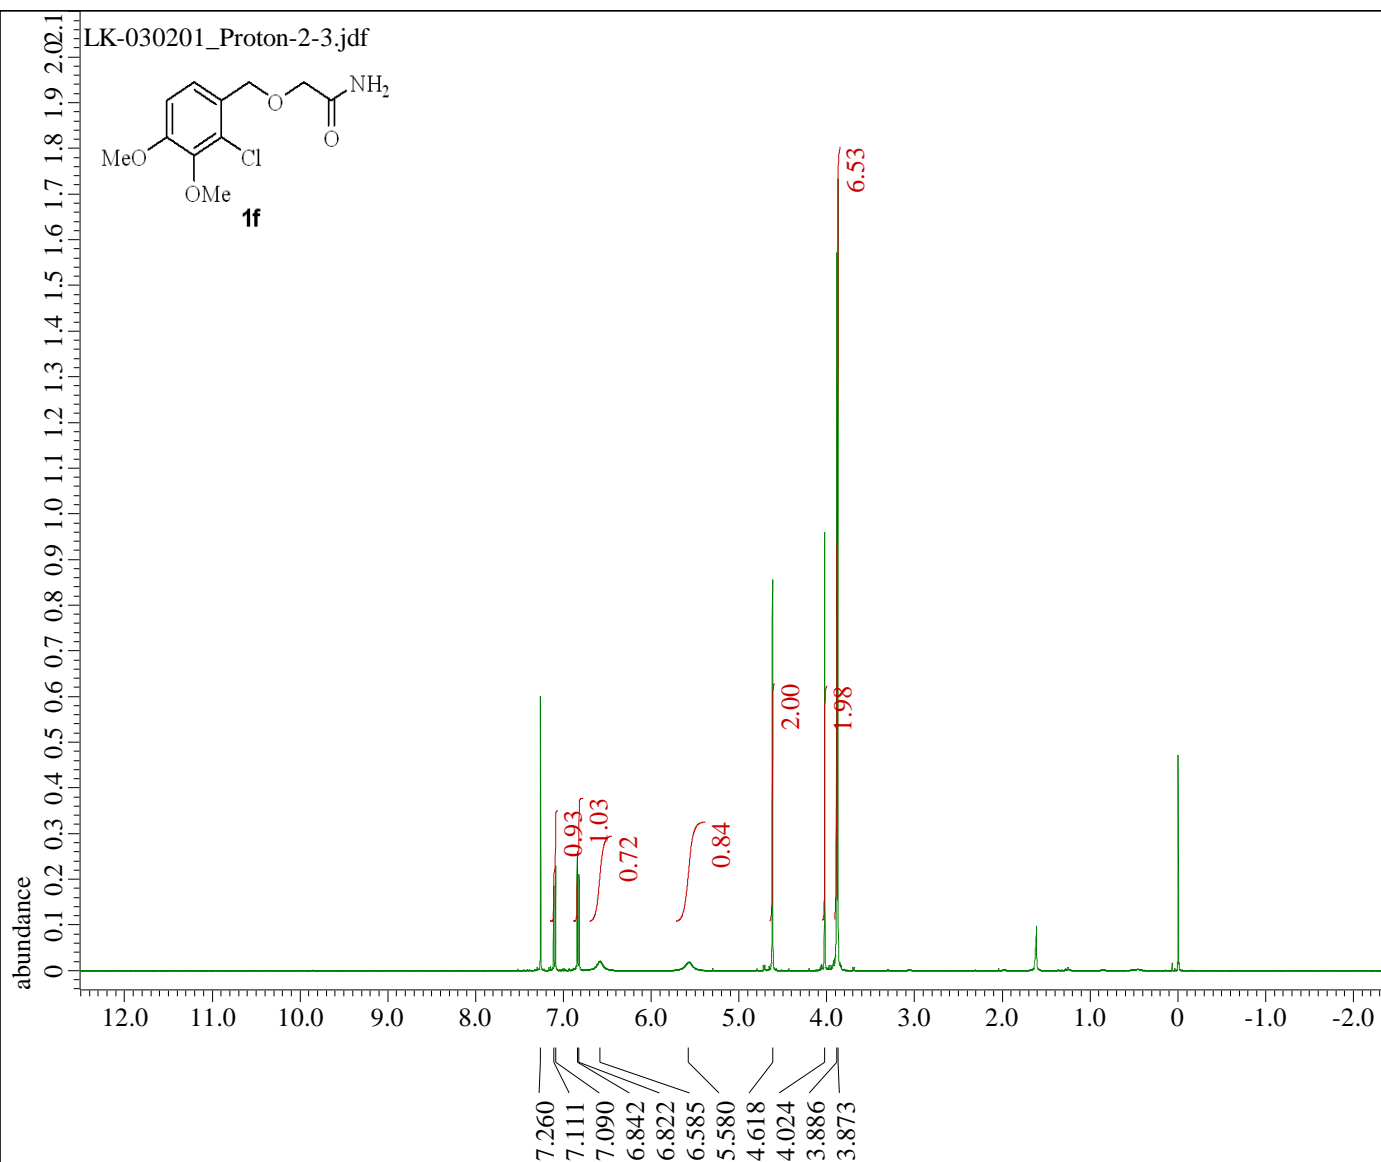

X : parts per Million : Proton

---- PROCESSING PARAMETERS ----  
sexp( 0.2[Hz], 0.0[s] )  
trapezoid( 0[%], 0[%], 80[%], 100[%] )  
zerofill( 1 )  
fft( 1, TRUE, TRUE )  
machinephase  
ppm

Derived from: LK-030201\_Proton-2-1.jdf

Filename = LK-030201\_Proton-2  
Author = delta  
Experiment = proton.jxp  
Sample\_Id = LK-030201  
Solvent = CHLOROFORM-D  
Actual\_Start\_Time = 23-MAR-2017 17:43:  
Revision\_Time = 10-AUG-2017 14:45:

Comment = single\_pulse  
Data\_Format = 1D COMPLEX  
Dim\_Size = 13107  
Dim\_Title = Proton  
Dim\_Units = [ppm]  
Dimensions = X  
Spectrometer = JNM-ECZ400S/L1

Field\_Strength = 9.389766[T] (400[M  
X\_Acq\_Duration = 2.18628096[s]  
X\_Domain = 1H  
X\_Freq = 399.78219838[MHz]  
X\_Offset = 5[ppm]  
X\_Points = 16384  
X\_Prescans = 1  
X\_Resolution = 0.45739775[Hz]  
X\_Sweep = 7.4940048[kHz]  
X\_Sweep\_Clippped = 5.99520384[kHz]  
Irr\_Domain = Proton  
Irr\_Freq = 399.78219838[MHz]  
Irr\_Offset = 5[ppm]  
Tri\_Domain = Proton  
Tri\_Freq = 399.78219838[MHz]  
Tri\_Offset = 5[ppm]  
Clipped = FALSE  
Scans = 8  
Total\_Scans = 8

Relaxation\_Delay = 5[s]  
Recvr\_Gain = 56  
Temp\_Get = 20.2[dc]  
X\_90\_Width = 9.5[us]  
X\_Acq\_Time = 2.18628096[s]

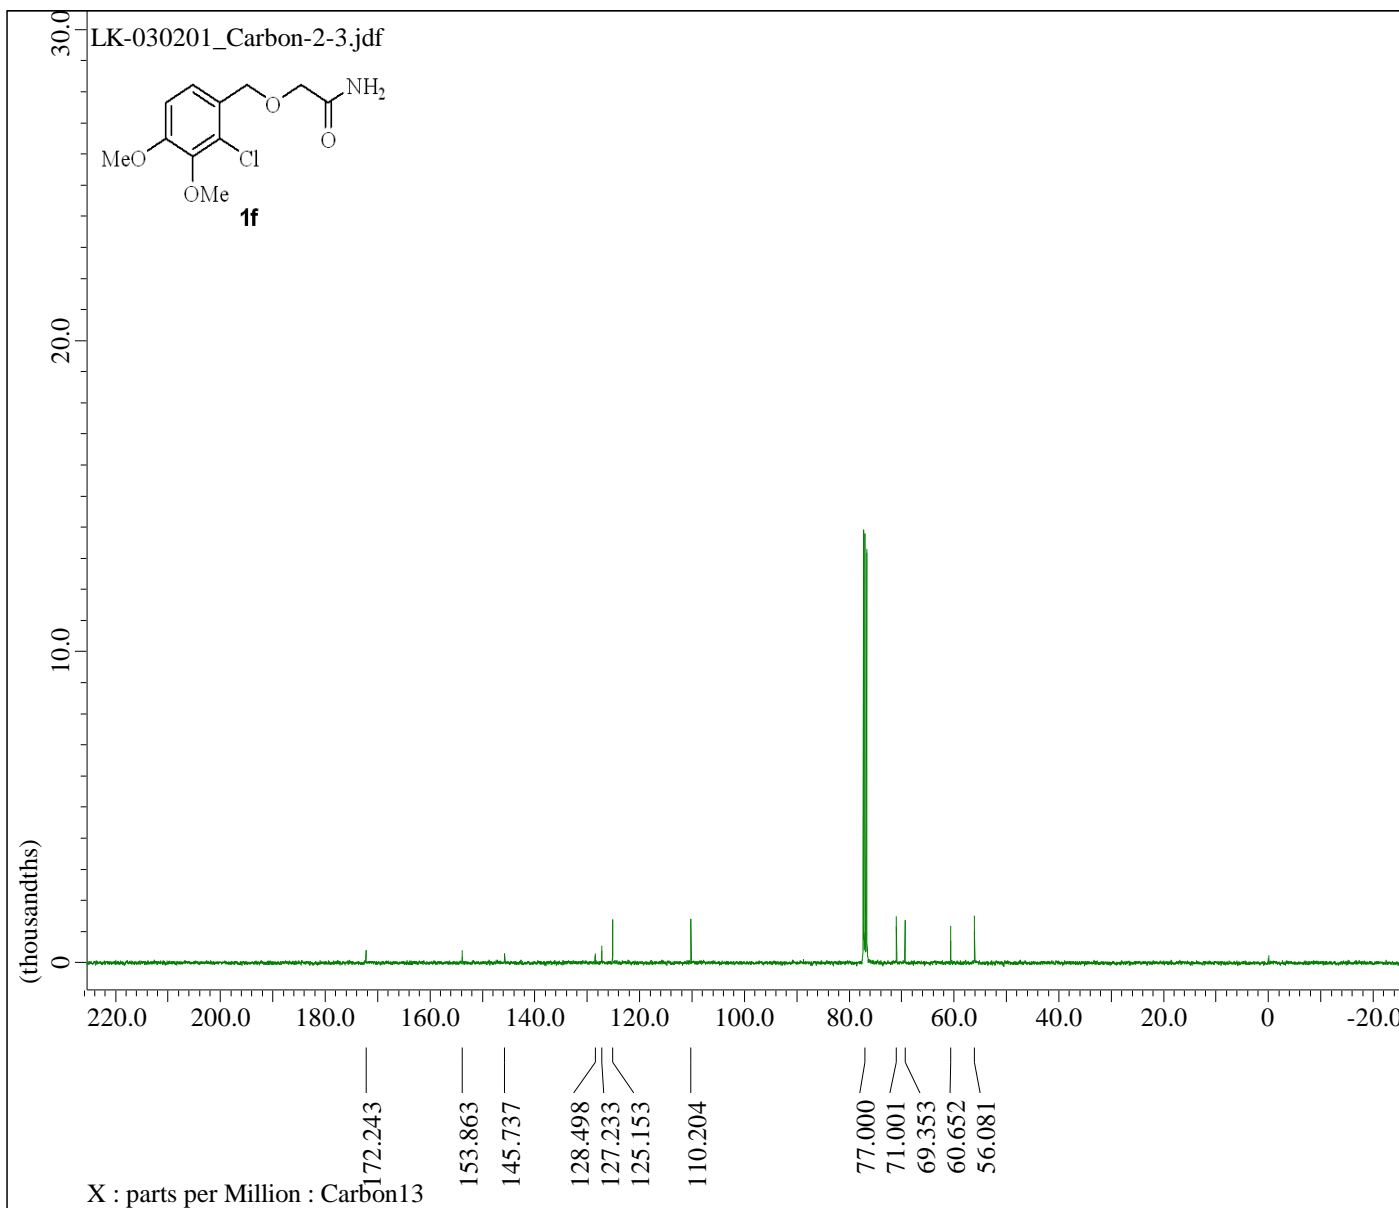

---- PROCESSING PARAMETERS ----  
 sexp( 2.0[Hz], 0.0[s] )  
 trapezoid( 0[%], 0[%], 80[%], 100[%] )  
 zerofill( 1 )  
 fft( 1, TRUE, TRUE )  
 machinephase  
 ppm  
 Derived from: LK-030201\_Carbon-2-1.jdf

Filename = LK-030201\_Carbon-2-3.jdf  
 Author = delta  
 Experiment = carbon.jxp  
 Sample\_Id = LK-030201  
 Solvent = CHLOROFORM-D  
 Actual\_Start\_Time = 23-MAR-2017 17:41:00  
 Revision\_Time = 10-AUG-2017 14:30:00

Comment = single pulse de  
 Data\_Format = 1D COMPLEX  
 Dim\_Size = 26214  
 Dim\_Title = Carbon13  
 Dim\_Units = [ppm]  
 Dimensions = X  
 Spectrometer = JNM-ECZ400S/L1

Field\_Strength = 9.389766[T] (400 MHz)  
 X\_Acq\_Duration = 1.03809024[s]  
 X\_Domain = 13C  
 X\_Freq = 100.52530333[MHz]  
 X\_Offset = 100[ppm]  
 X\_Points = 32768  
 X\_Prescans = 4  
 X\_Resolution = 0.96330739[Hz]  
 X\_Sweep = 31.56565657[kHz]  
 X\_Sweep\_Clipped = 25.25252525[kHz]  
 Irr\_Domain = Proton  
 Irr\_Freq = 399.78219838[MHz]  
 Irr\_Offset = 5[ppm]  
 Clipped = FALSE  
 Scans = 1024  
 Total\_Scans = 1024

Relaxation\_Delay = 2[s]  
 Recvr\_Gain = 50  
 Temp\_Get = 18.7[dC]  
 X\_90\_Width = 8.8[us]  
 X\_Acq\_Time = 1.03809024[s]  
 X\_Angle = 30[deg]  
 X\_Atn = 3.4[dB]  
 X\_Pulse = 2.93333333[us]



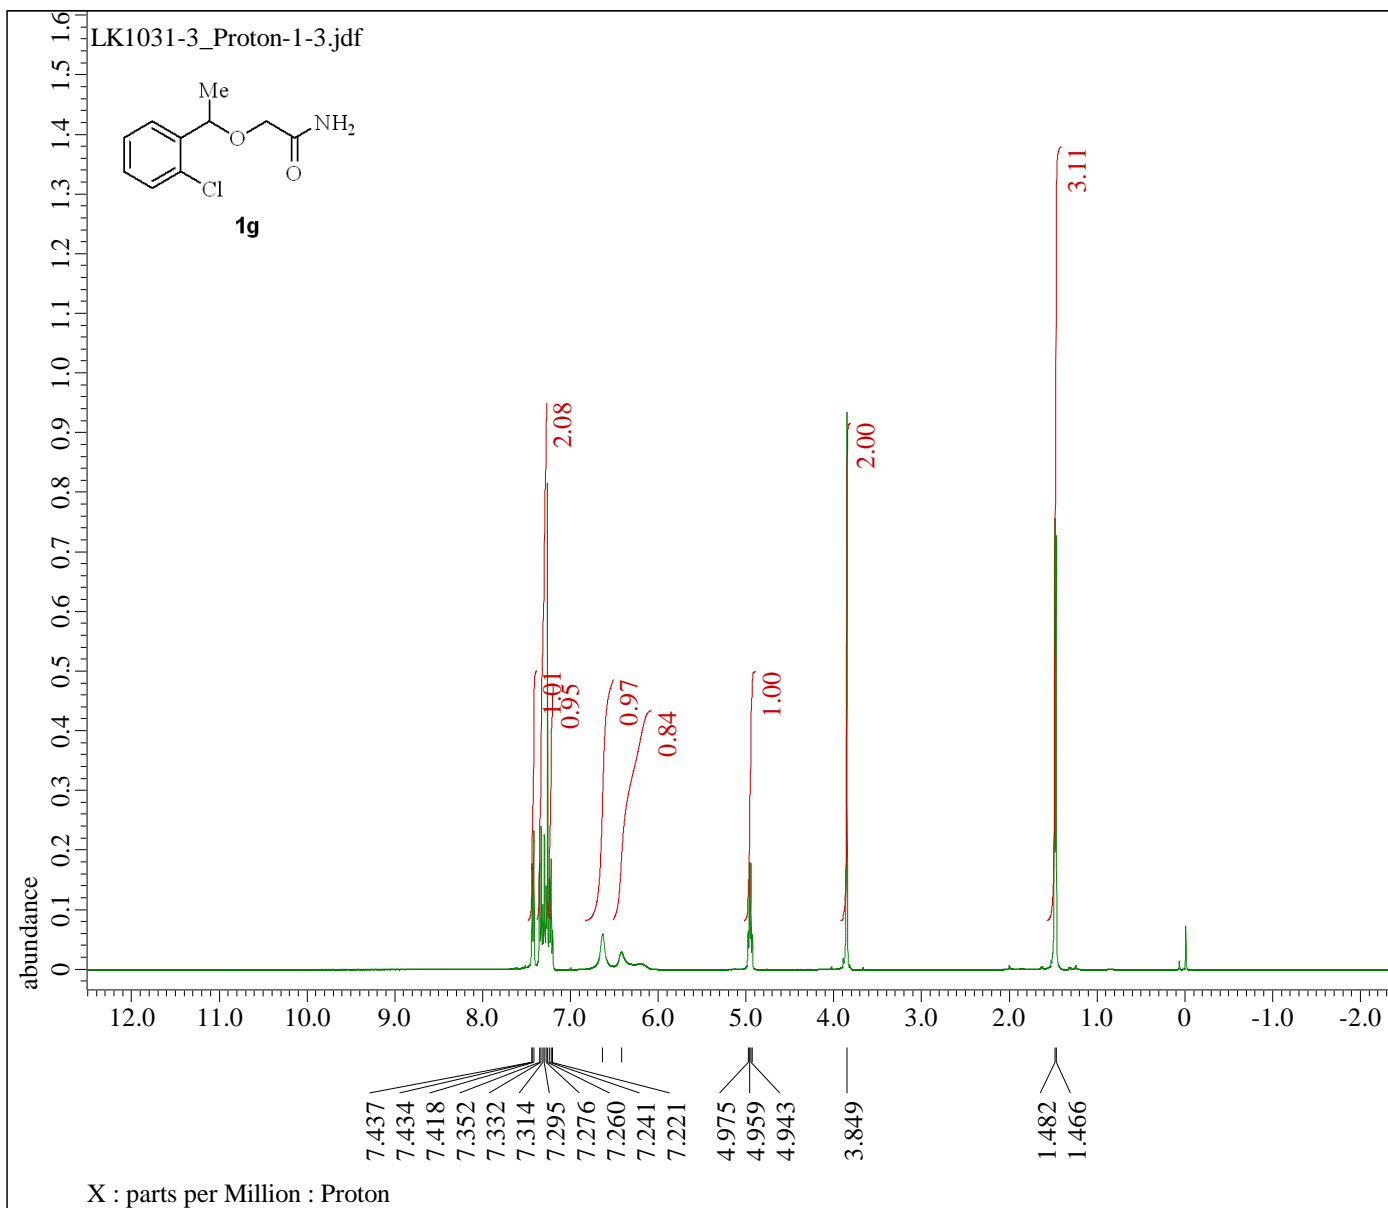

---- PROCESSING PARAMETERS ----  
 sexp( 0.2[Hz], 0.0[s] )  
 trapezoid( 0[%], 0[%], 80[%], 100[%] )  
 zerofill( 1 )  
 fft( 1, TRUE, TRUE )  
 machinephase  
 ppm  
 Derived from: LK1031-3\_Proton-1-1.jdf

Filename = LK1031-3\_Proton-1-1.jdf  
 Author = delta  
 Experiment = proton.jxp  
 Sample\_Id = LK1031-3  
 Solvent = CHLOROFORM-D  
 Actual\_Start\_Time = 31-OCT-2016 16:31:00  
 Revision\_Time = 10-AUG-2017 16:19:00

Comment = single\_pulse  
 Data\_Format = 1D COMPLEX  
 Dim\_Size = 13107  
 Dim\_Title = Proton  
 Dim\_Units = [ppm]  
 Dimensions = X  
 Spectrometer = JNM-ECZ400S/L1

Field\_Strength = 9.389766[T] (400[M])  
 X\_Acq\_Duration = 2.18628096[s]  
 X\_Domain = 1H  
 X\_Freq = 399.78219838[MHz]  
 X\_Offset = 5[ppm]  
 X\_Points = 16384  
 X\_Prescans = 1  
 X\_Resolution = 0.45739775[Hz]  
 X\_Sweep = 7.4940048[kHz]  
 X\_Sweep\_Clipped = 5.99520384[kHz]  
 Irr\_Domain = Proton  
 Irr\_Freq = 399.78219838[MHz]  
 Irr\_Offset = 5[ppm]  
 Tri\_Domain = Proton  
 Tri\_Freq = 399.78219838[MHz]  
 Tri\_Offset = 5[ppm]  
 Clipped = FALSE  
 Scans = 8  
 Total\_Scans = 8

Relaxation\_Delay = 5[s]  
 Recvr\_Gain = 46  
 Temp\_Get = 14[dC]  
 X\_90\_Width = 9.5[us]  
 X\_Acq\_Time = 2.18628096[s]

LK1031-3\_Carbon-1-3.jdf

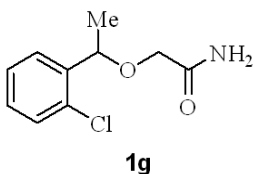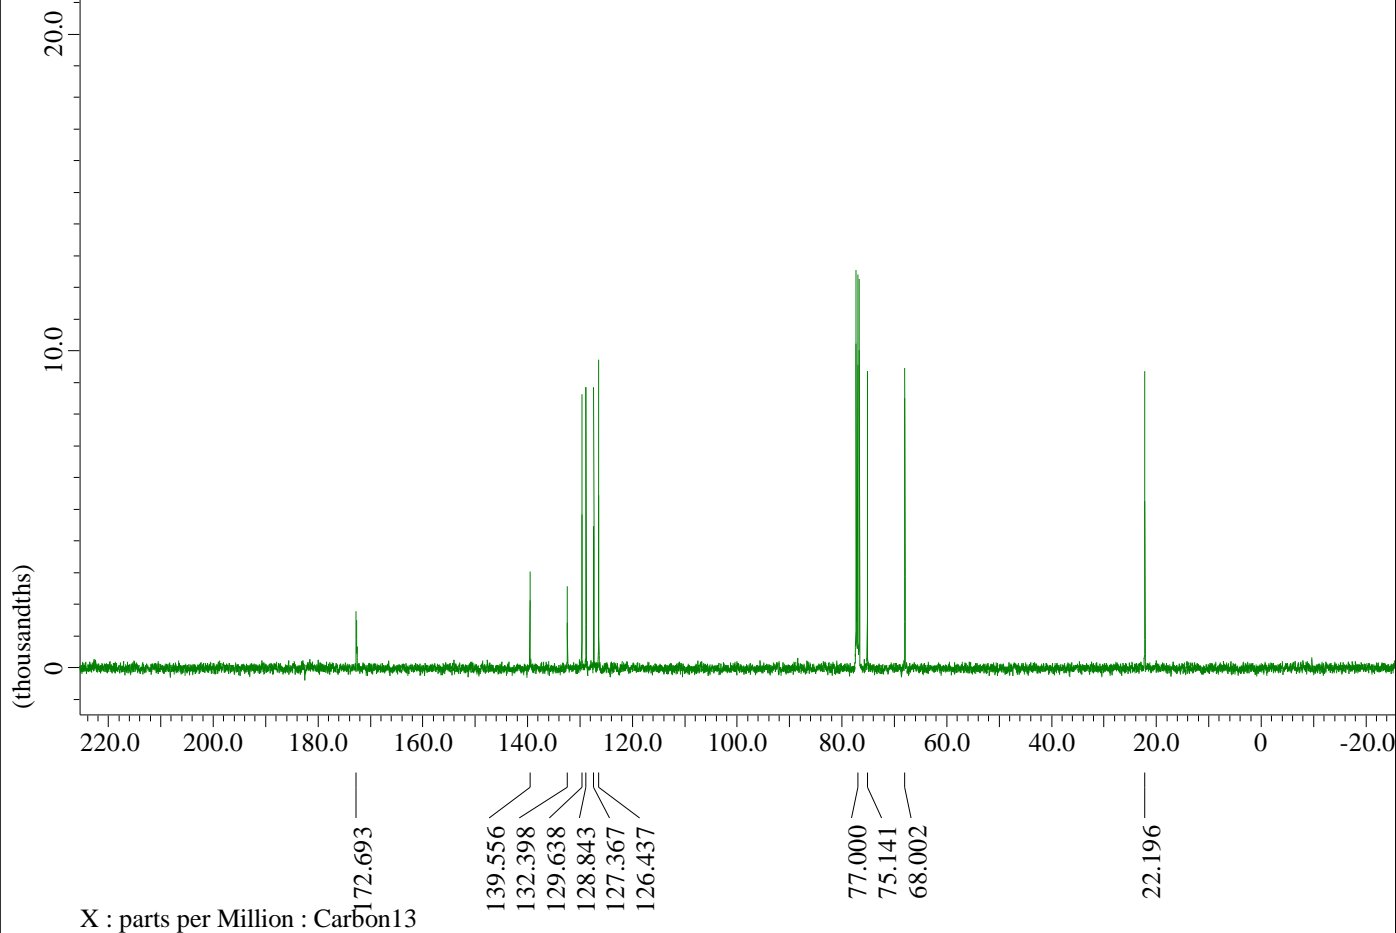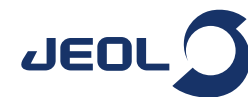

---- PROCESSING PARAMETERS ----  
 sexp( 2.0[Hz], 0.0[s] )  
 trapezoid( 0[%], 0[%], 80[%], 100[%] )  
 zerofill( 1 )  
 fft( 1, TRUE, TRUE )  
 machinephase  
 ppm  
 Derived from: LK1031-3\_Carbon-1-1.jdf

Filename = LK1031-3\_Carbon-1-1.jdf  
 Author = delta  
 Experiment = carbon.jxp  
 Sample\_Id = LK1031-3  
 Solvent = CHLOROFORM-D  
 Actual\_Start\_Time = 31-OCT-2016 17:00:00  
 Revision\_Time = 10-AUG-2017 16:00:00

Comment = single pulse de  
 Data\_Format = 1D COMPLEX  
 Dim\_Size = 26214  
 Dim\_Title = Carbon13  
 Dim\_Units = [ppm]  
 Dimensions = X  
 Spectrometer = JNM-ECZ400S/L1

Field\_Strength = 9.389766[T] (400 MHz)  
 X\_Acq\_Duration = 1.03809024[s]  
 X\_Domain = 13C  
 X\_Freq = 100.52530333[MHz]  
 X\_Offset = 100[ppm]  
 X\_Points = 32768  
 X\_Prescans = 4  
 X\_Resolution = 0.96330739[Hz]  
 X\_Sweep = 31.56565657[kHz]  
 X\_Sweep\_Clipped = 25.25252525[kHz]  
 Irr\_Domain = Proton  
 Irr\_Freq = 399.78219838[MHz]  
 Irr\_Offset = 5[ppm]  
 Clipped = FALSE  
 Scans = 144  
 Total\_Scans = 144

Relaxation\_Delay = 2[s]  
 Recvr\_Gain = 50  
 Temp\_Get = 15.8[dC]  
 X\_90\_Width = 8.8[us]  
 X\_Acq\_Time = 1.03809024[s]  
 X\_Angle = 30[deg]  
 X\_Atn = 3.4[dB]  
 X\_Pulse = 2.93333333[us]

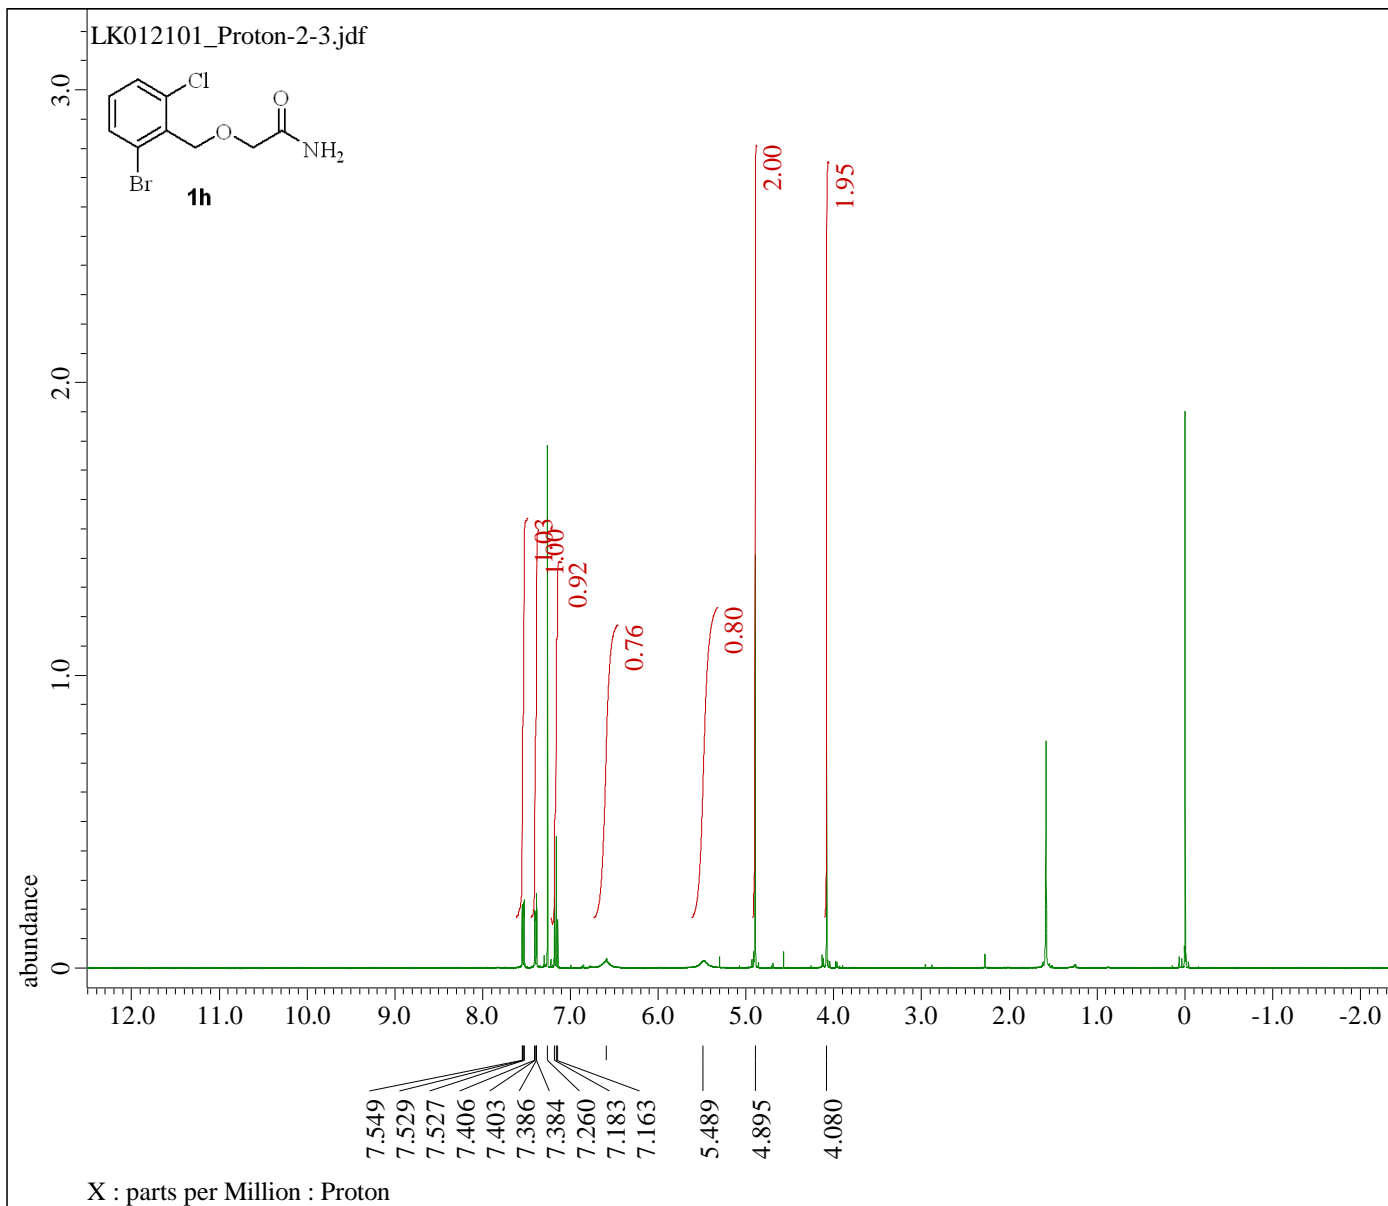

---- PROCESSING PARAMETERS ----  
 sexp( 0.2[Hz], 0.0[s] )  
 trapezoid( 0[%], 0[%], 80[%], 100[%] )  
 zerofill( 1 )  
 fft( 1, TRUE, TRUE )  
 machinephase  
 ppm  
 Derived from: LK012101\_Proton-2-1.jdf

Filename = LK012101\_Proton-2-  
 Author = delta  
 Experiment = proton.jxp  
 Sample\_Id = LK012101  
 Solvent = CHLOROFORM-D  
 Actual\_Start\_Time = 22-JAN-2017 17:39:  
 Revision\_Time = 10-AUG-2017 16:29:

Comment = single\_pulse  
 Data\_Format = 1D COMPLEX  
 Dim\_Size = 13107  
 Dim\_Title = Proton  
 Dim\_Units = [ppm]  
 Dimensions = X  
 Spectrometer = JNM-ECZ400S/L1

Field\_Strength = 9.389766[T] (400[M  
 X\_Acq\_Duration = 2.18628096[s]  
 X\_Domain = 1H  
 X\_Freq = 399.78219838[MHz]  
 X\_Offset = 5[ppm]  
 X\_Points = 16384  
 X\_Prescans = 1  
 X\_Resolution = 0.45739775[Hz]  
 X\_Sweep = 7.4940048[kHz]  
 X\_Sweep\_Clipped = 5.99520384[kHz]  
 Irr\_Domain = Proton  
 Irr\_Freq = 399.78219838[MHz]  
 Irr\_Offset = 5[ppm]  
 Tri\_Domain = Proton  
 Tri\_Freq = 399.78219838[MHz]  
 Tri\_Offset = 5[ppm]  
 Clipped = FALSE  
 Scans = 8  
 Total\_Scans = 8

Relaxation\_Delay = 5[s]  
 Recvr\_Gain = 66  
 Temp\_Get = 18.5[dC]  
 X\_90\_Width = 9.5[us]  
 X\_Acq\_Time = 2.18628096[s]

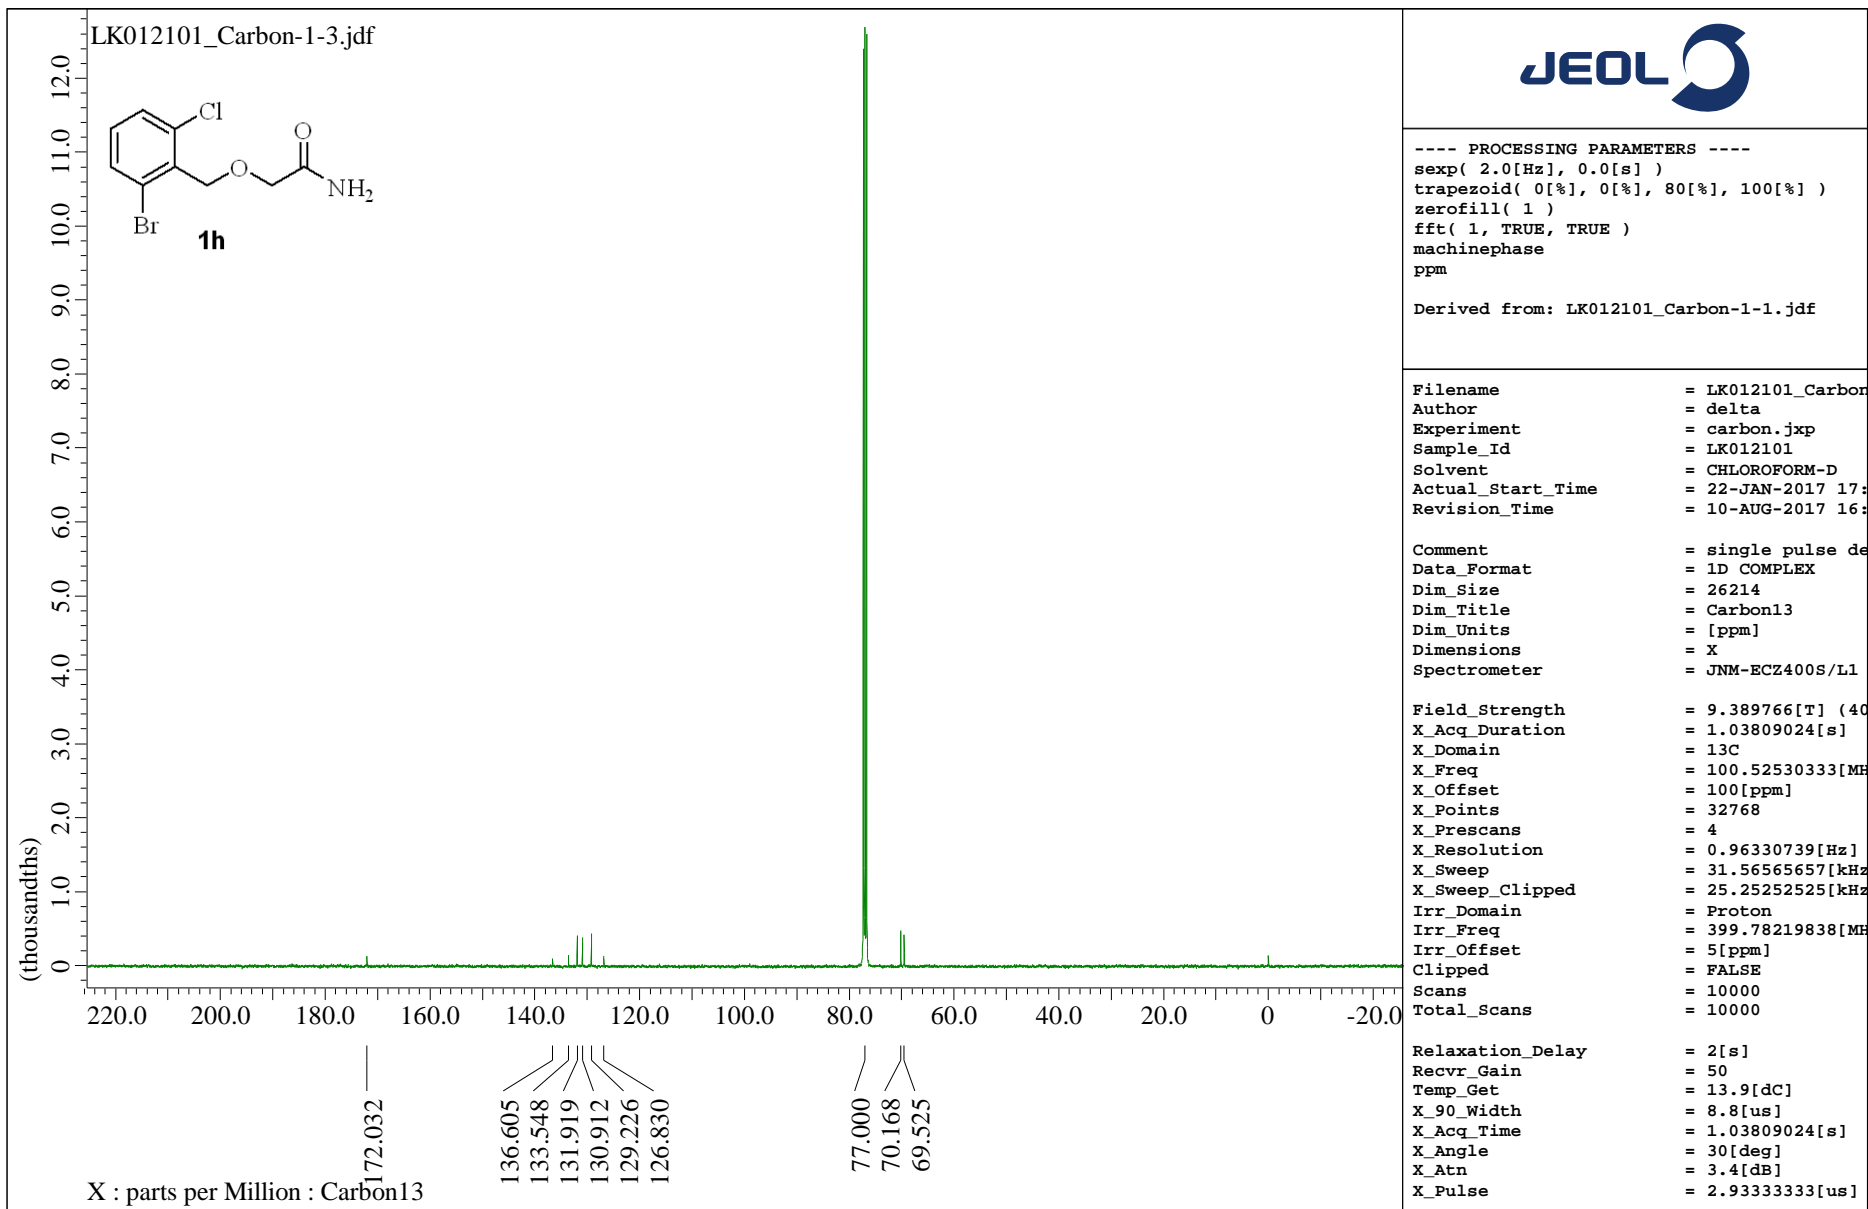

LK012102\_Proton-1-3.jdf

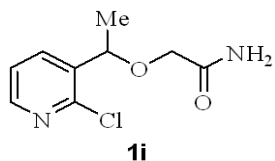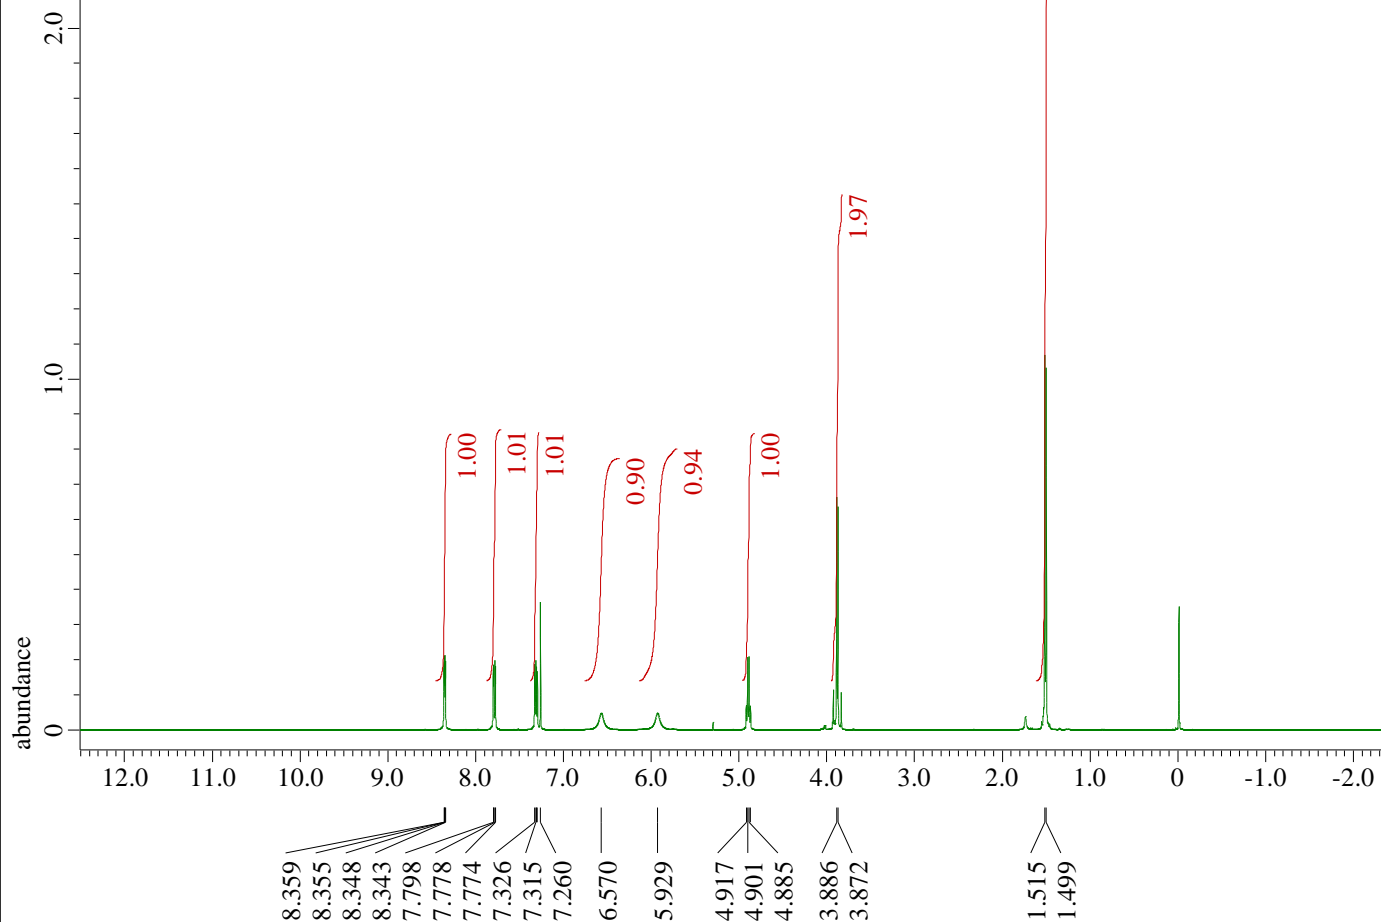

X : parts per Million : Proton



---- PROCESSING PARAMETERS ----  
 sexp( 0.2[Hz], 0.0[s] )  
 trapezoid( 0[%], 0[%], 80[%], 100[%] )  
 zerofill( 1 )  
 fft( 1, TRUE, TRUE )  
 machinephase  
 ppm

Derived from: LK012102\_Proton-1-1.jdf

Filename = LK012102\_Proton-1-  
 Author = delta  
 Experiment = proton.jxp  
 Sample\_Id = LK012102  
 Solvent = CHLOROFORM-D  
 Actual\_Start\_Time = 22-JAN-2017 14:50:  
 Revision\_Time = 10-AUG-2017 16:42:

Comment = single\_pulse  
 Data\_Format = 1D COMPLEX  
 Dim\_Size = 13107  
 Dim\_Title = Proton  
 Dim\_Units = [ppm]  
 Dimensions = X  
 Spectrometer = JNM-ECZ400S/L1

Field\_Strength = 9.389766[T] (400[M  
 X\_Acq\_Duration = 2.18628096[s]  
 X\_Domain = 1H  
 X\_Freq = 399.78219838[MHz]  
 X\_Offset = 5[ppm]  
 X\_Points = 16384  
 X\_Prescans = 1  
 X\_Resolution = 0.45739775[Hz]  
 X\_Sweep = 7.4940048[kHz]  
 X\_Sweep\_Clipped = 5.99520384[kHz]  
 Irr\_Domain = Proton  
 Irr\_Freq = 399.78219838[MHz]  
 Irr\_Offset = 5[ppm]  
 Tri\_Domain = Proton  
 Tri\_Freq = 399.78219838[MHz]  
 Tri\_Offset = 5[ppm]  
 Clipped = FALSE  
 Scans = 8  
 Total\_Scans = 8

Relaxation\_Delay = 5[s]  
 Recvr\_Gain = 56  
 Temp\_Get = 13.8[dC]  
 X\_90\_Width = 9.5[us]  
 X\_Acq\_Time = 2.18628096[s]

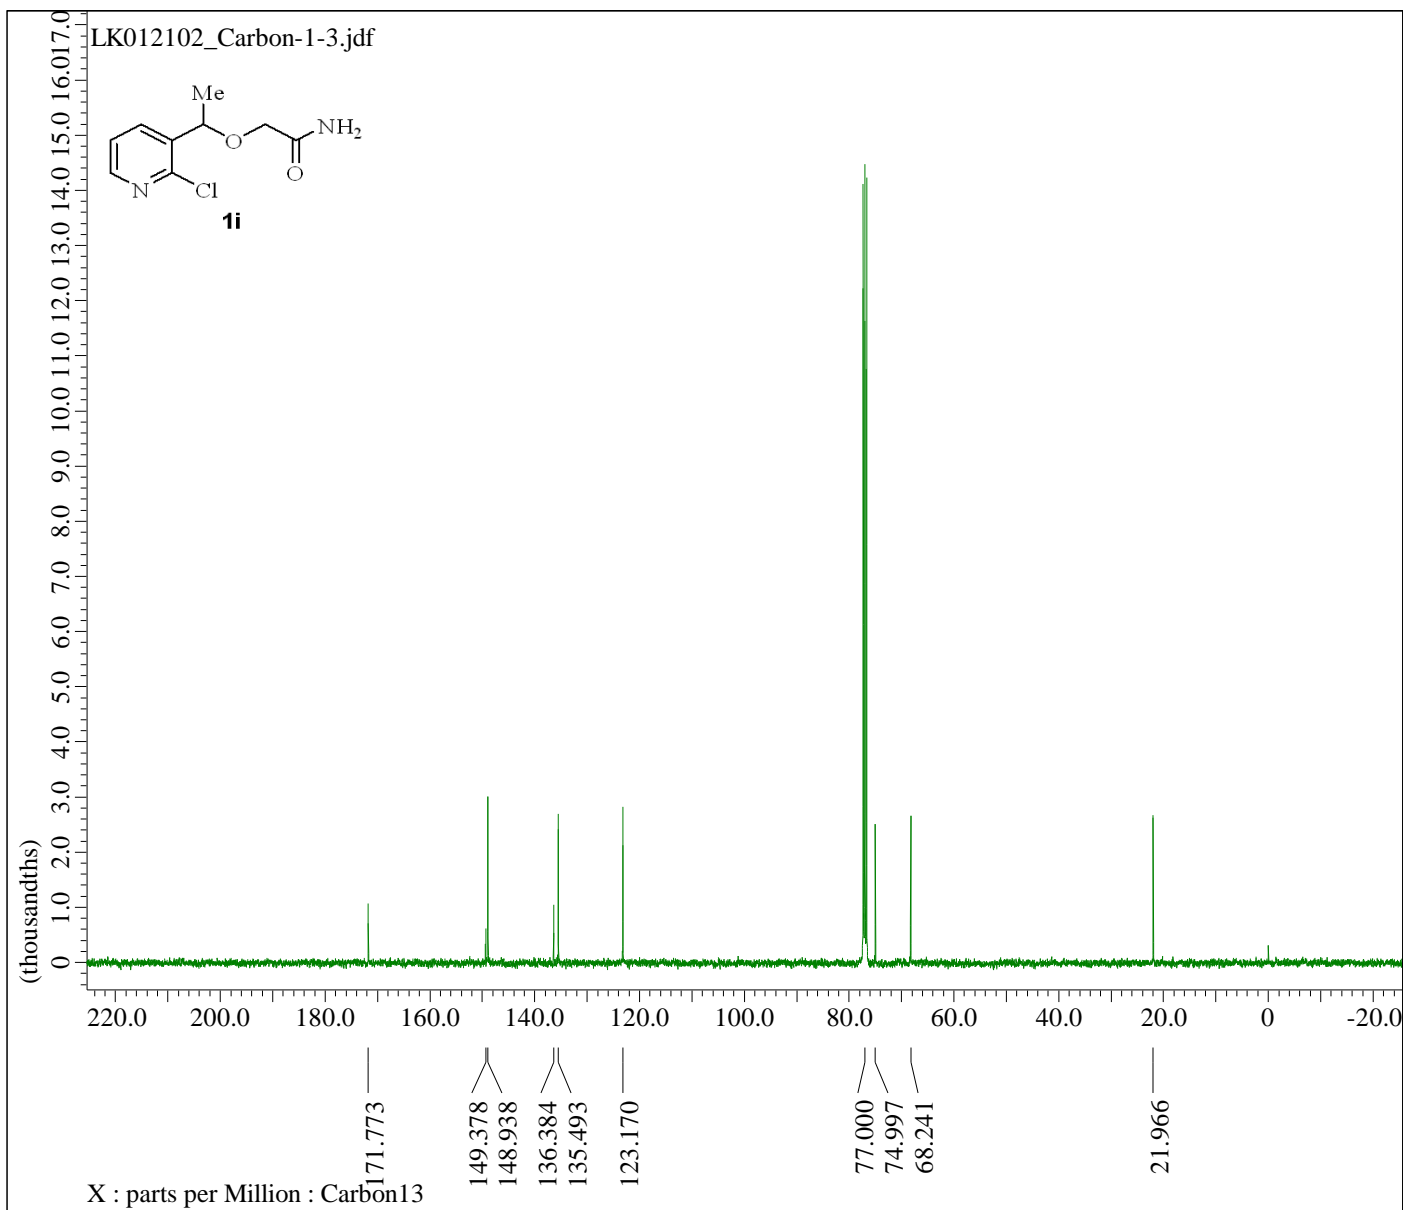

---- PROCESSING PARAMETERS ----  
 sexp( 2.0[Hz], 0.0[s] )  
 trapezoid( 0[%], 0[%], 80[%], 100[%] )  
 zerofill( 1 )  
 fft( 1, TRUE, TRUE )  
 machinephase  
 ppm  
 Derived from: LK012102\_Carbon-1-1.jdf

Filename = LK012102\_Carbon-1-3.jdf  
 Author = delta  
 Experiment = carbon.jxp  
 Sample\_Id = LK012102  
 Solvent = CHLOROFORM-D  
 Actual\_Start\_Time = 22-JAN-2017 15:54:00  
 Revision\_Time = 10-AUG-2017 16:00:00

Comment = single pulse de  
 Data\_Format = 1D COMPLEX  
 Dim\_Size = 26214  
 Dim\_Title = Carbon13  
 Dim\_Units = [ppm]  
 Dimensions = X  
 Spectrometer = JNM-ECZ400S/L1

Field\_Strength = 9.389766[T] (400 MHz)  
 X\_Acq\_Duration = 1.03809024[s]  
 X\_Domain = 13C  
 X\_Freq = 100.52530333[MHz]  
 X\_Offset = 100[ppm]  
 X\_Points = 32768  
 X\_Prescans = 4  
 X\_Resolution = 0.96330739[Hz]  
 X\_Sweep = 31.56565657[kHz]  
 X\_Sweep\_Clipped = 25.25252525[kHz]  
 Irr\_Domain = Proton  
 Irr\_Freq = 399.78219838[MHz]  
 Irr\_Offset = 5[ppm]  
 Clipped = FALSE  
 Scans = 805  
 Total\_Scans = 805

Relaxation\_Delay = 2[s]  
 Recvr\_Gain = 50  
 Temp\_Get = 15.4[dC]  
 X\_90\_Width = 8.8[us]  
 X\_Acq\_Time = 1.03809024[s]  
 X\_Angle = 30[deg]  
 X\_Atn = 3.4[dB]  
 X\_Pulse = 2.93333333[us]

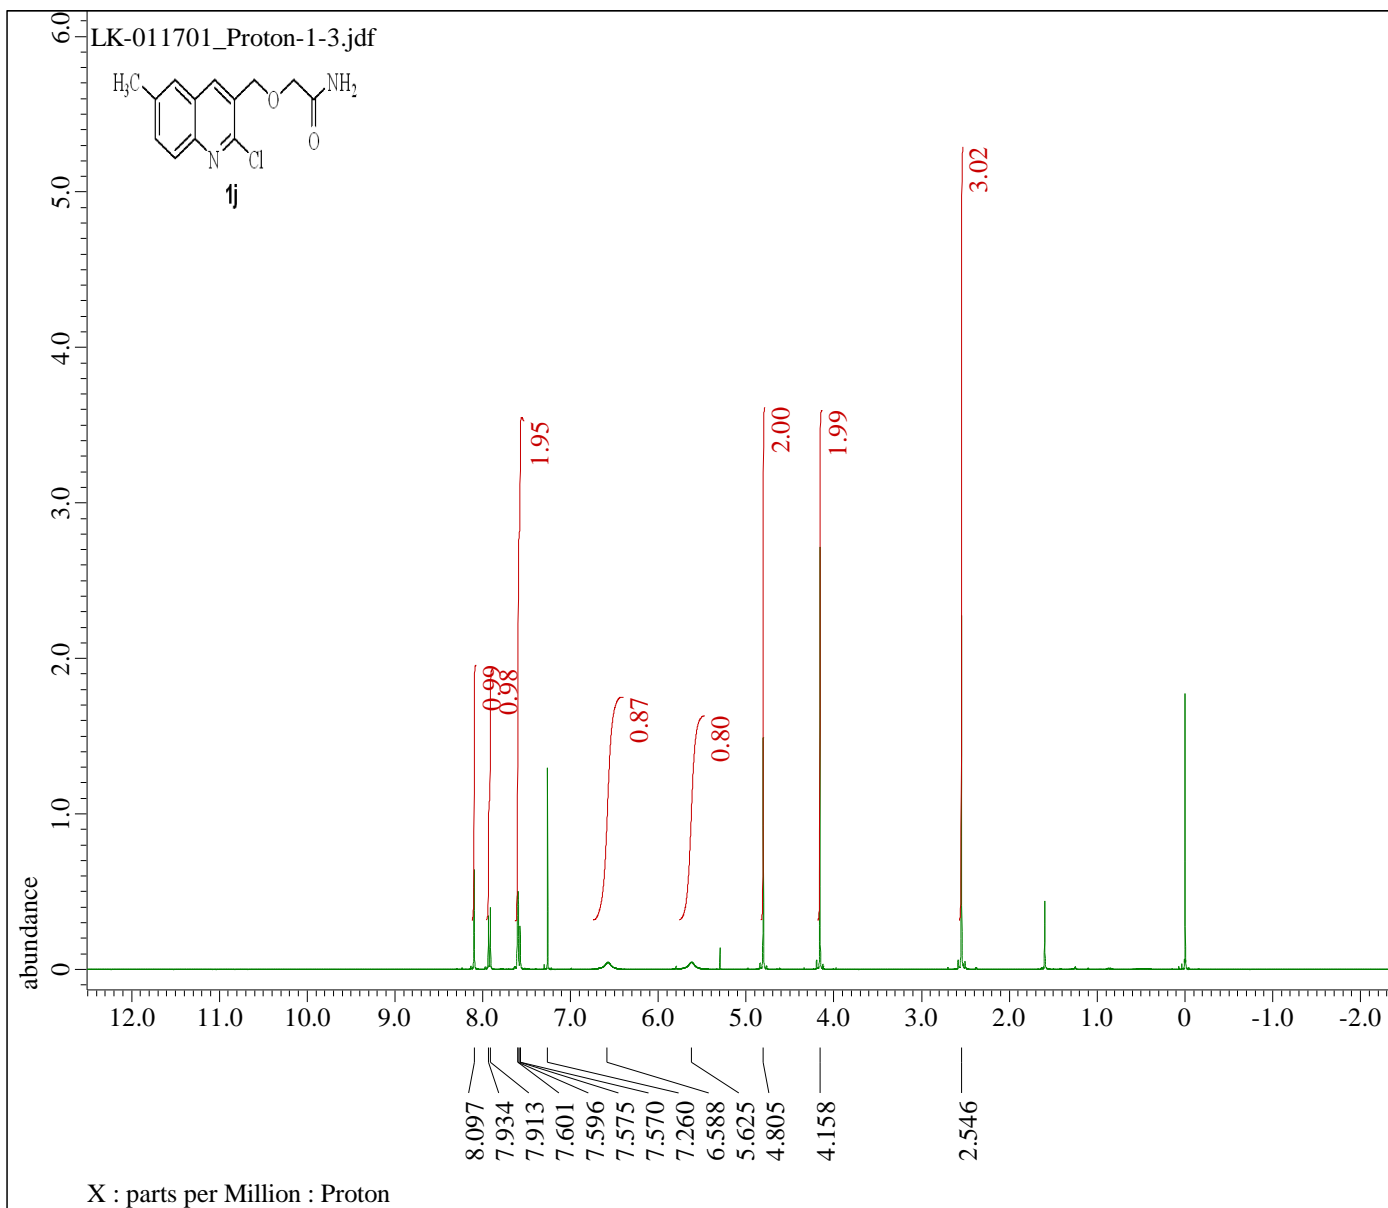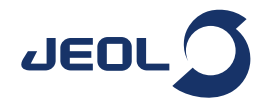

---- PROCESSING PARAMETERS ----  
 sexp( 0.2[Hz], 0.0[s] )  
 trapezoid( 0[%], 0[%], 80[%], 100[%] )  
 zerofill( 1 )  
 fft( 1, TRUE, TRUE )  
 machinephase  
 ppm  
 Derived from: LK-011701\_Proton-1-1.jdf

Filename = LK-011701\_Proton-1  
 Author = delta  
 Experiment = proton.jxp  
 Sample\_Id = LK-011701  
 Solvent = CHLOROFORM-D  
 Actual\_Start\_Time = 17-JAN-2017 17:48:  
 Revision\_Time = 10-AUG-2017 17:01:

Comment = single\_pulse  
 Data\_Format = 1D COMPLEX  
 Dim\_Size = 13107  
 Dim\_Title = Proton  
 Dim\_Units = [ppm]  
 Dimensions = X  
 Spectrometer = JNM-ECZ400S/L1

Field\_Strength = 9.389766[T] (400[M  
 X\_Acq\_Duration = 2.18628096[s]  
 X\_Domain = 1H  
 X\_Freq = 399.78219838[MHz]  
 X\_Offset = 5[ppm]  
 X\_Points = 16384  
 X\_Prescans = 1  
 X\_Resolution = 0.45739775[Hz]  
 X\_Sweep = 7.4940048[kHz]  
 X\_Sweep\_Clipped = 5.99520384[kHz]  
 Irr\_Domain = Proton  
 Irr\_Freq = 399.78219838[MHz]  
 Irr\_Offset = 5[ppm]  
 Tri\_Domain = Proton  
 Tri\_Freq = 399.78219838[MHz]  
 Tri\_Offset = 5[ppm]  
 Clipped = FALSE  
 Scans = 8  
 Total\_Scans = 8  
 Relaxation\_Delay = 5[s]  
 Recvr\_Gain = 66  
 Temp\_Get = 24.1[dC]  
 X\_90\_Width = 9.5[us]  
 X\_Acq\_Time = 2.18628096[s]

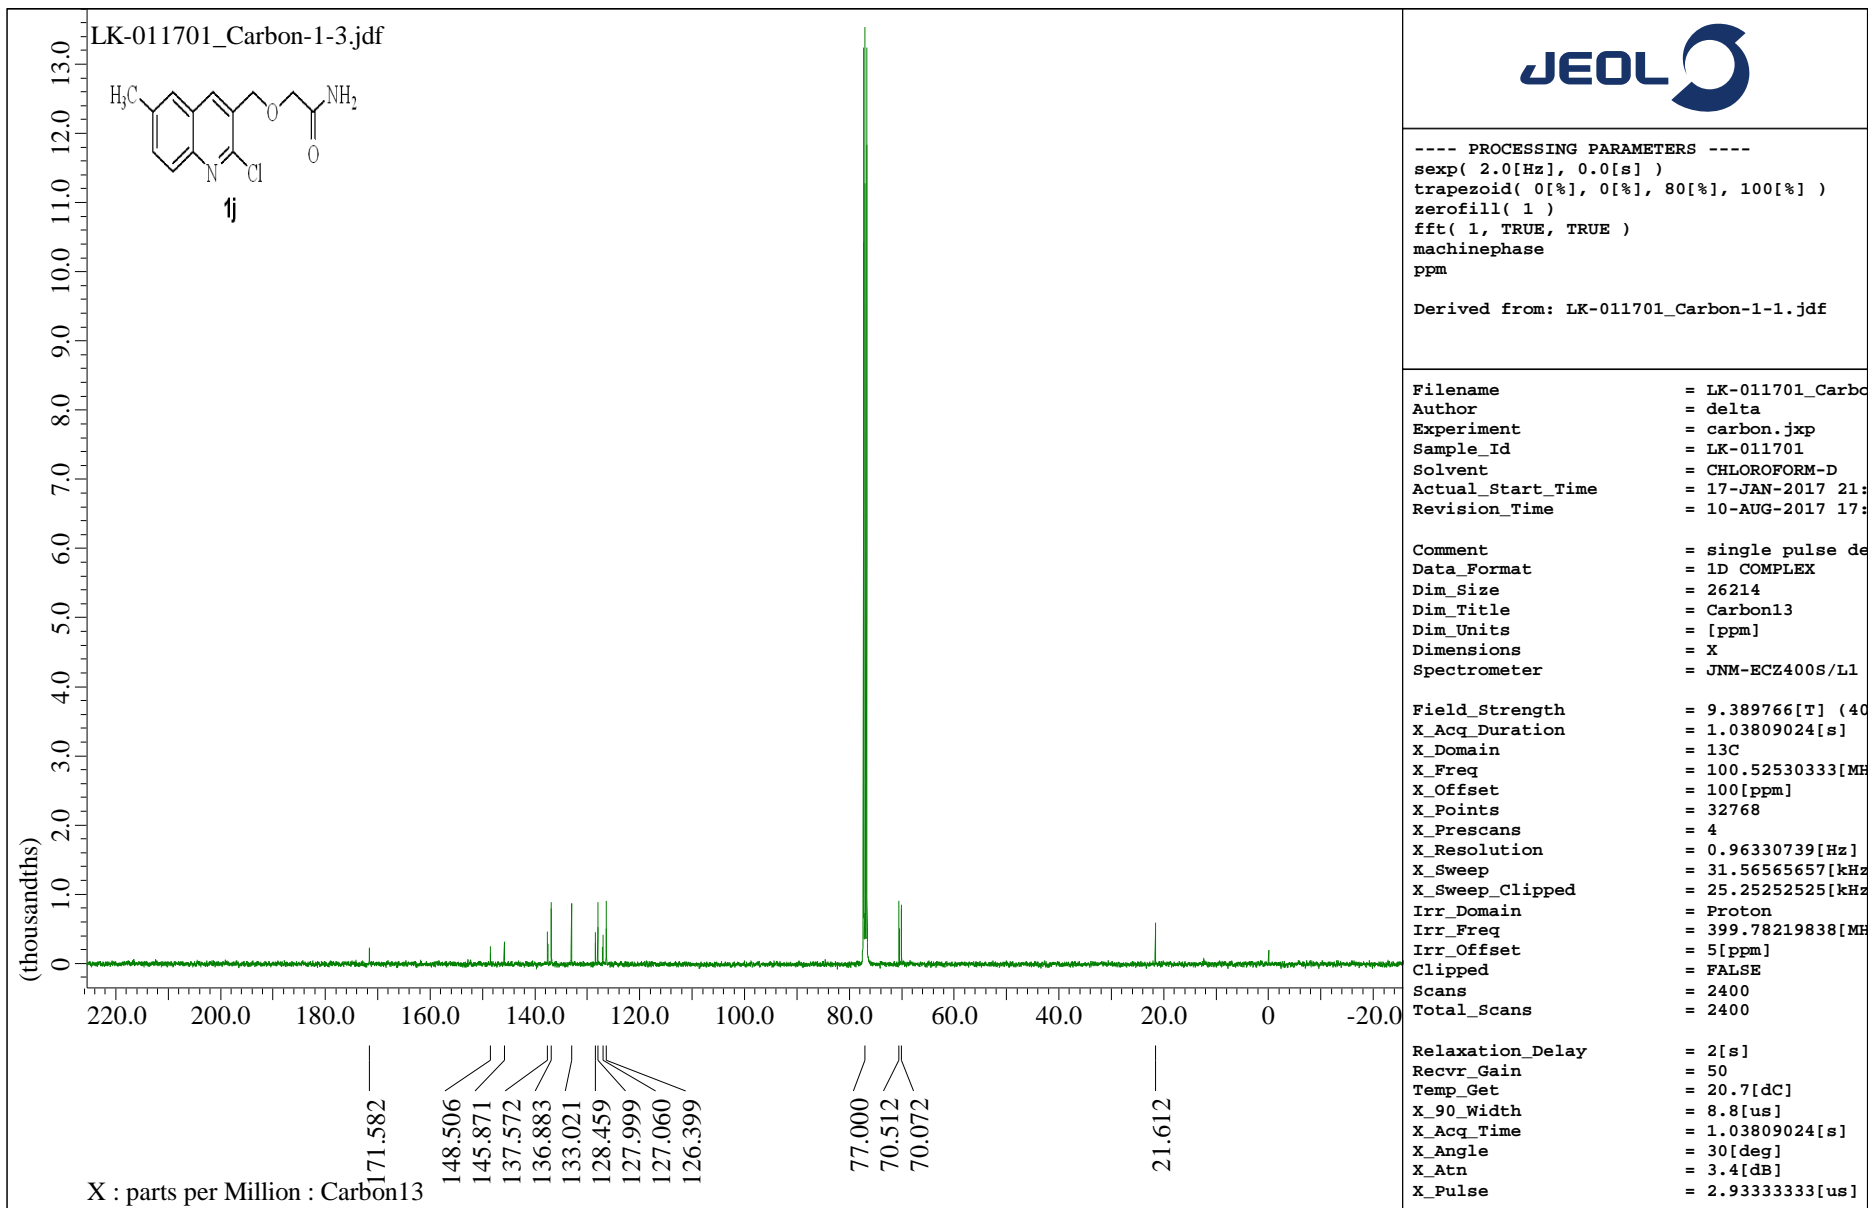



LK031403\_Proton-1-36.jdf

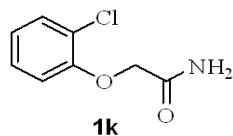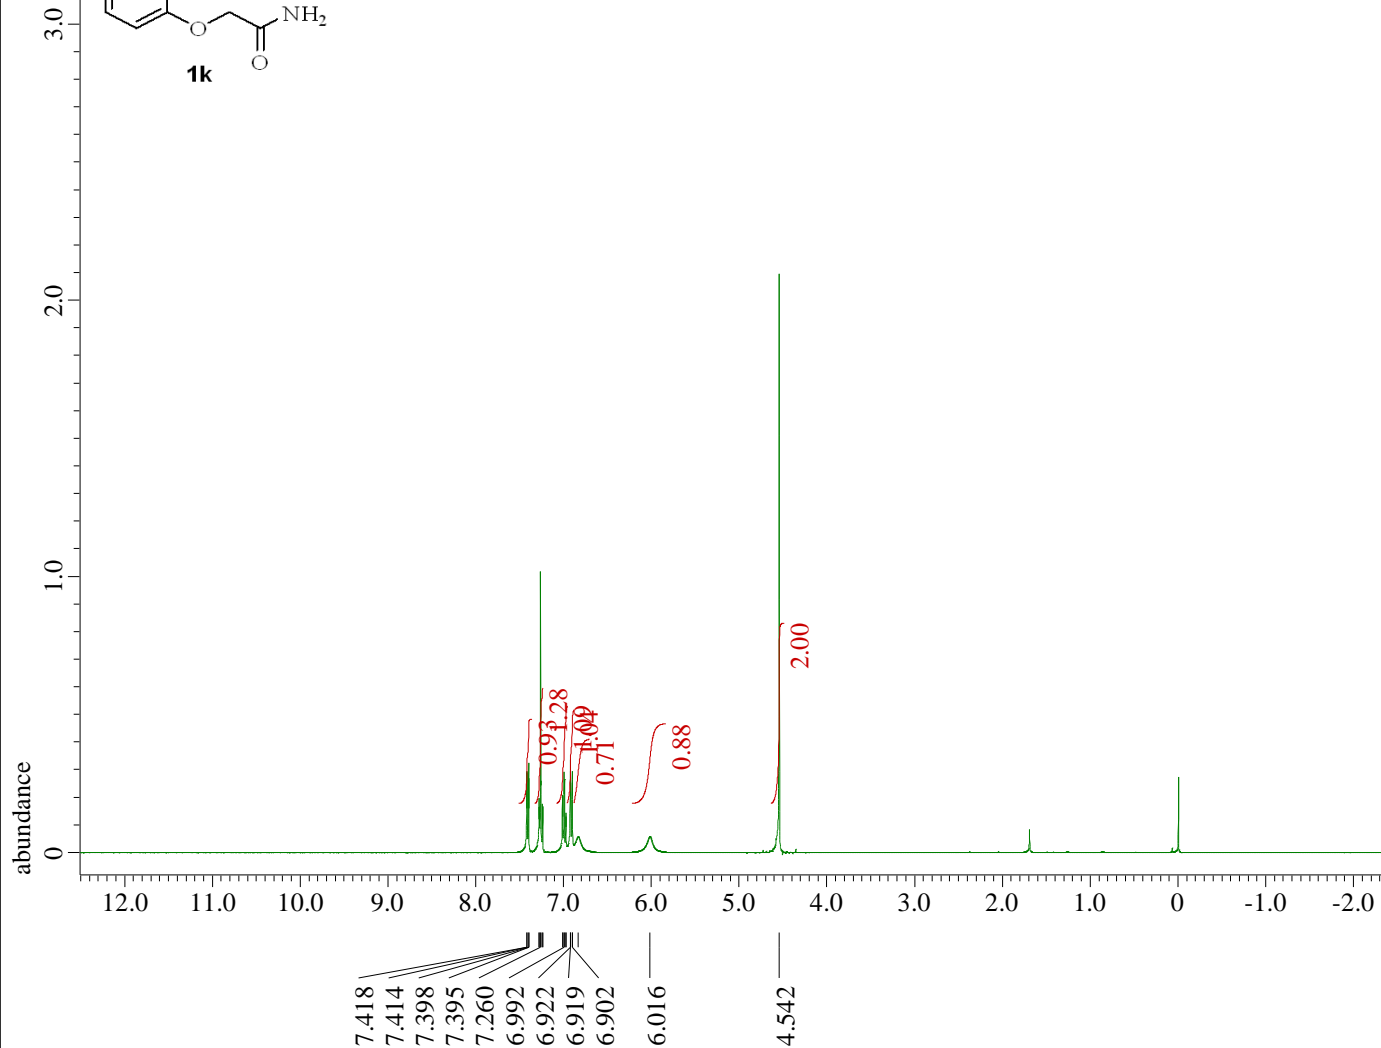

X : parts per Million : Proton



---- PROCESSING PARAMETERS ----  
 sexp( 0.2[Hz], 0.0[s] )  
 trapezoid( 0[%], 0[%], 80[%], 100[%] )  
 zerofill( 1 )  
 fft( 1, TRUE, TRUE )  
 machinephase  
 ppm

Derived from: LK031403\_Proton-1-1.jdf

Filename = LK031403\_Proton-1-1.jdf  
 Author = delta  
 Experiment = proton.jxp  
 Sample\_Id = LK031403  
 Solvent = CHLOROFORM-D  
 Actual\_Start\_Time = 14-MAR-2017 15:53:44  
 Revision\_Time = 10-AUG-2017 17:14:30

Comment = single\_pulse  
 Data\_Format = 1D COMPLEX  
 Dim\_Size = 13107  
 Dim\_Title = Proton  
 Dim\_Units = [ppm]  
 Dimensions = X  
 Spectrometer = JNM-ECZ400S/L1

Field\_Strength = 9.389766[T] (400[M])  
 X\_Acq\_Duration = 2.18628096[s]  
 X\_Domain = 1H  
 X\_Freq = 399.78219838[MHz]  
 X\_Offset = 5[ppm]  
 X\_Points = 16384  
 X\_Prescans = 1  
 X\_Resolution = 0.45739775[Hz]  
 X\_Sweep = 7.4940048[kHz]  
 X\_Sweep\_Clippped = 5.99520384[kHz]  
 Irr\_Domain = Proton  
 Irr\_Freq = 399.78219838[MHz]  
 Irr\_Offset = 5[ppm]  
 Tri\_Domain = Proton  
 Tri\_Freq = 399.78219838[MHz]  
 Tri\_Offset = 5[ppm]  
 Clipped = FALSE  
 Scans = 8  
 Total\_Scans = 8

Relaxation\_Delay = 5[s]  
 Recvr\_Gain = 56  
 Temp\_Get = 15.1[dc]  
 X\_90\_Width = 9.5[us]  
 X\_Acq\_Time = 2.18628096[s]

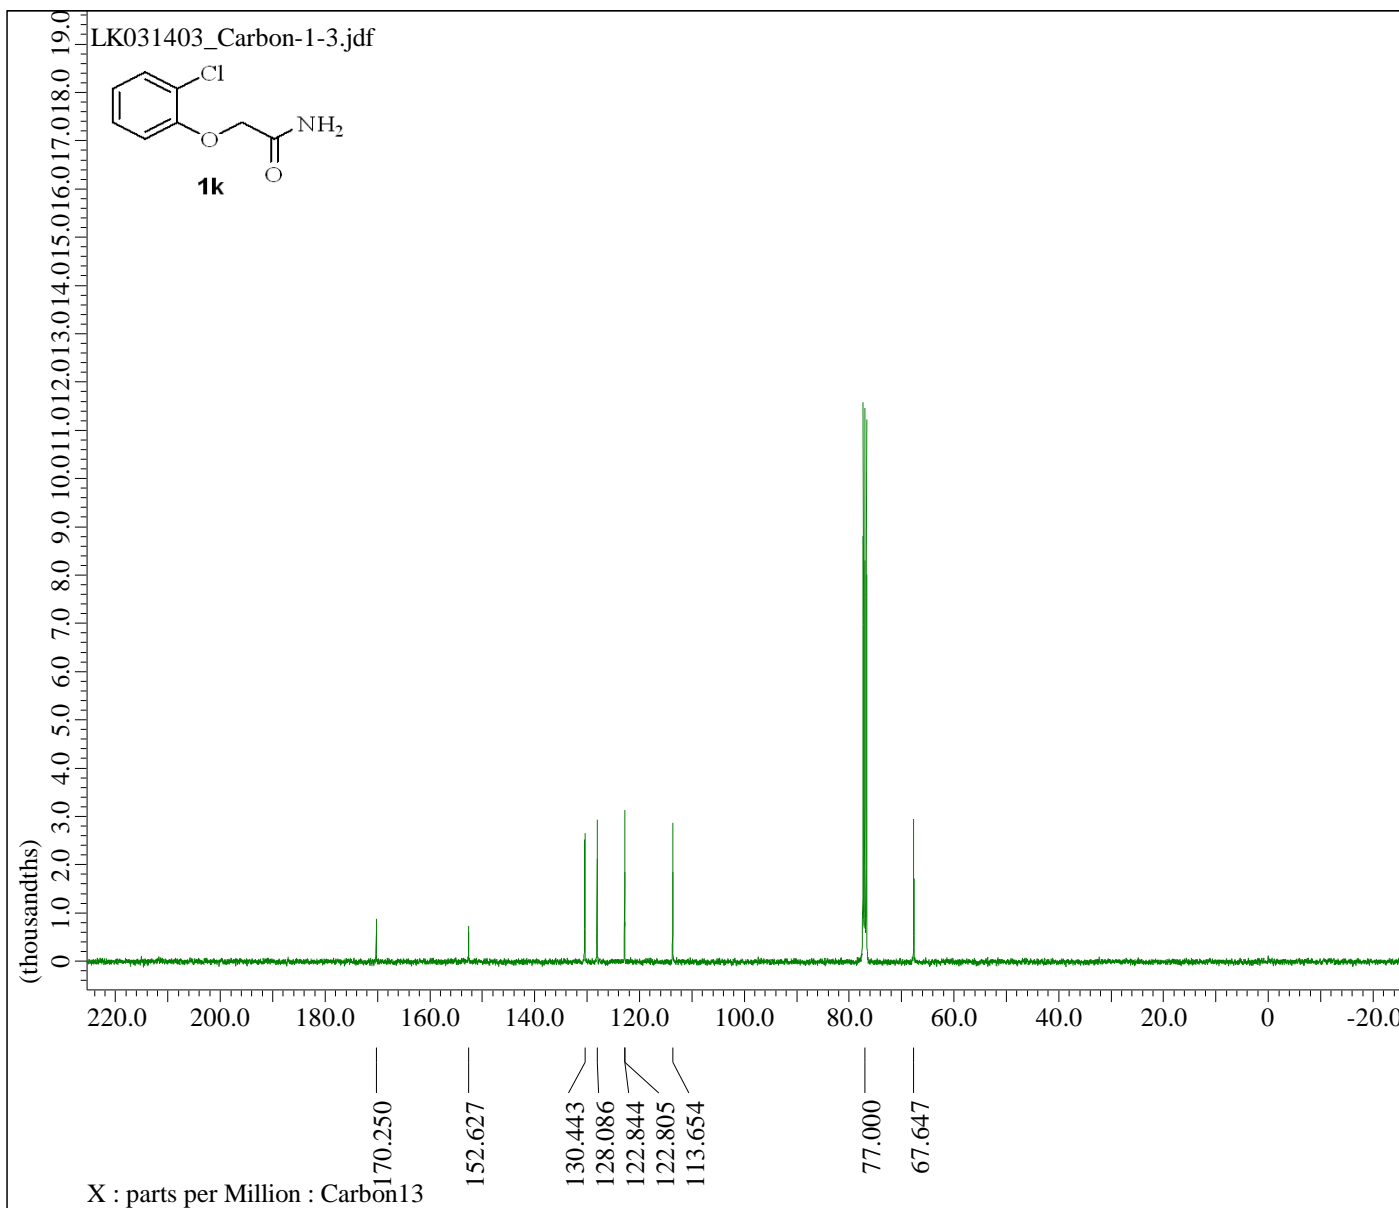

---- PROCESSING PARAMETERS ----  
 sexp( 2.0[Hz], 0.0[s] )  
 trapezoid( 0[%], 0[%], 80[%], 100[%] )  
 zerofill( 1 )  
 fft( 1, TRUE, TRUE )  
 machinephase  
 ppm  
 Derived from: LK031403\_Carbon-1-1.jdf

Filename = LK031403\_Carbon-1-1.jdf  
 Author = delta  
 Experiment = carbon.jxp  
 Sample\_Id = LK031403  
 Solvent = CHLOROFORM-D  
 Actual\_Start\_Time = 14-MAR-2017 18:00:00  
 Revision\_Time = 10-AUG-2017 17:00:00

Comment = single pulse de  
 Data\_Format = 1D COMPLEX  
 Dim\_Size = 26214  
 Dim\_Title = Carbon13  
 Dim\_Units = [ppm]  
 Dimensions = X  
 Spectrometer = JNM-ECZ400S/L1

Field\_Strength = 9.389766[T] (400 MHz)  
 X\_Acq\_Duration = 1.03809024[s]  
 X\_Domain = 13C  
 X\_Freq = 100.52530333[MHz]  
 X\_Offset = 100[ppm]  
 X\_Points = 32768  
 X\_Prescans = 4  
 X\_Resolution = 0.96330739[Hz]  
 X\_Sweep = 31.56565657[kHz]  
 X\_Sweep\_Clipped = 25.25252525[kHz]  
 Irr\_Domain = Proton  
 Irr\_Freq = 399.78219838[MHz]  
 Irr\_Offset = 5[ppm]  
 Clipped = FALSE  
 Scans = 1024  
 Total\_Scans = 1024

Relaxation\_Delay = 2[s]  
 Recvr\_Gain = 50  
 Temp\_Get = 15.5[dC]  
 X\_90\_Width = 8.8[us]  
 X\_Acq\_Time = 1.03809024[s]  
 X\_Angle = 30[deg]  
 X\_Atn = 3.4[dB]  
 X\_Pulse = 2.93333333[us]

LK1027NEW\_Proton-1-3.jdf

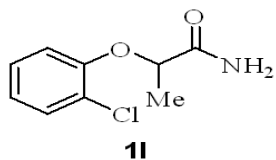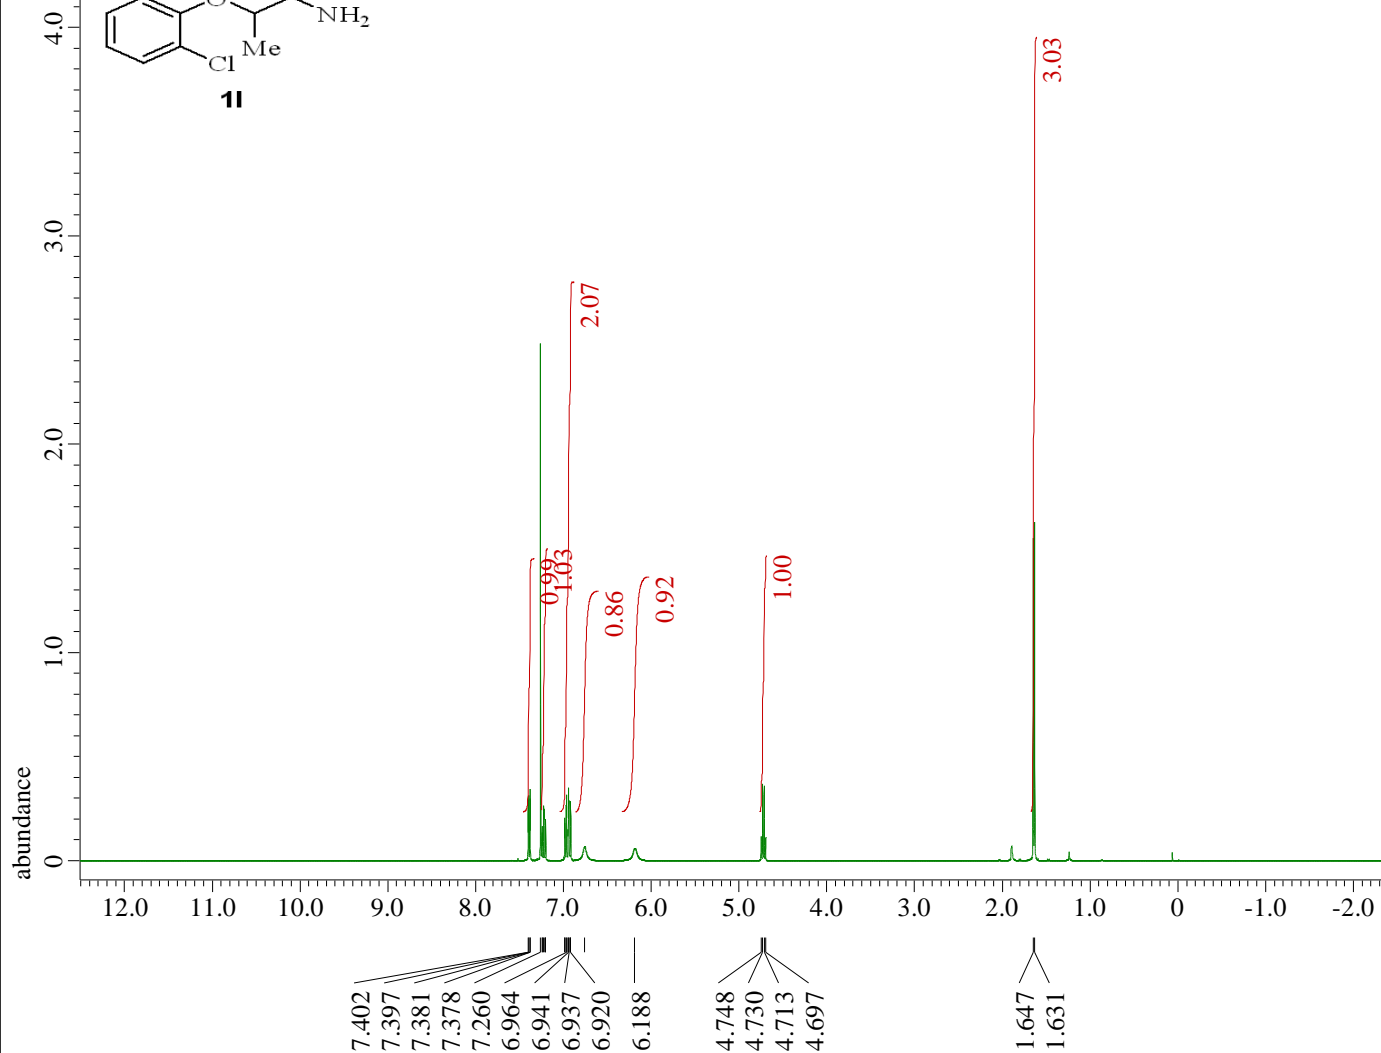

X : parts per Million : Proton



---- PROCESSING PARAMETERS ----  
 sexp( 0.2[Hz], 0.0[s] )  
 trapezoid( 0[%], 0[%], 80[%], 100[%] )  
 zerofill( 1 )  
 fft( 1, TRUE, TRUE )  
 machinephase  
 ppm

Derived from: LK1027NEW\_Proton-1-1.jdf

Filename = LK1027NEW\_Proton-1  
 Author = delta  
 Experiment = proton.jxp  
 Sample\_Id = LK1027NEW  
 Solvent = CHLOROFORM-D  
 Actual\_Start\_Time = 31-OCT-2016 16:25:  
 Revision\_Time = 10-AUG-2017 17:54:

Comment = single\_pulse  
 Data\_Format = 1D COMPLEX  
 Dim\_Size = 13107  
 Dim\_Title = Proton  
 Dim\_Units = [ppm]  
 Dimensions = X  
 Spectrometer = JNM-ECZ400S/L1

Field\_Strength = 9.389766[T] (400[M  
 X\_Acq\_Duration = 2.18628096[s]  
 X\_Domain = 1H  
 X\_Freq = 399.78219838[MHz]  
 X\_Offset = 5[ppm]  
 X\_Points = 16384  
 X\_Prescans = 1  
 X\_Resolution = 0.45739775[Hz]  
 X\_Sweep = 7.4940048[kHz]  
 X\_Sweep\_Clipped = 5.99520384[kHz]  
 Irr\_Domain = Proton  
 Irr\_Freq = 399.78219838[MHz]  
 Irr\_Offset = 5[ppm]  
 Tri\_Domain = Proton  
 Tri\_Freq = 399.78219838[MHz]  
 Tri\_Offset = 5[ppm]  
 Clipped = FALSE  
 Scans = 8  
 Total\_Scans = 8

Relaxation\_Delay = 5[s]  
 Recvr\_Gain = 46  
 Temp\_Get = 14.1[dC]  
 X\_90\_Width = 9.5[us]  
 X\_Acq\_Time = 2.18628096[s]

LK1027NEW\_Carbon-1-3.jdf

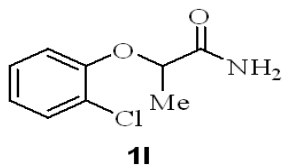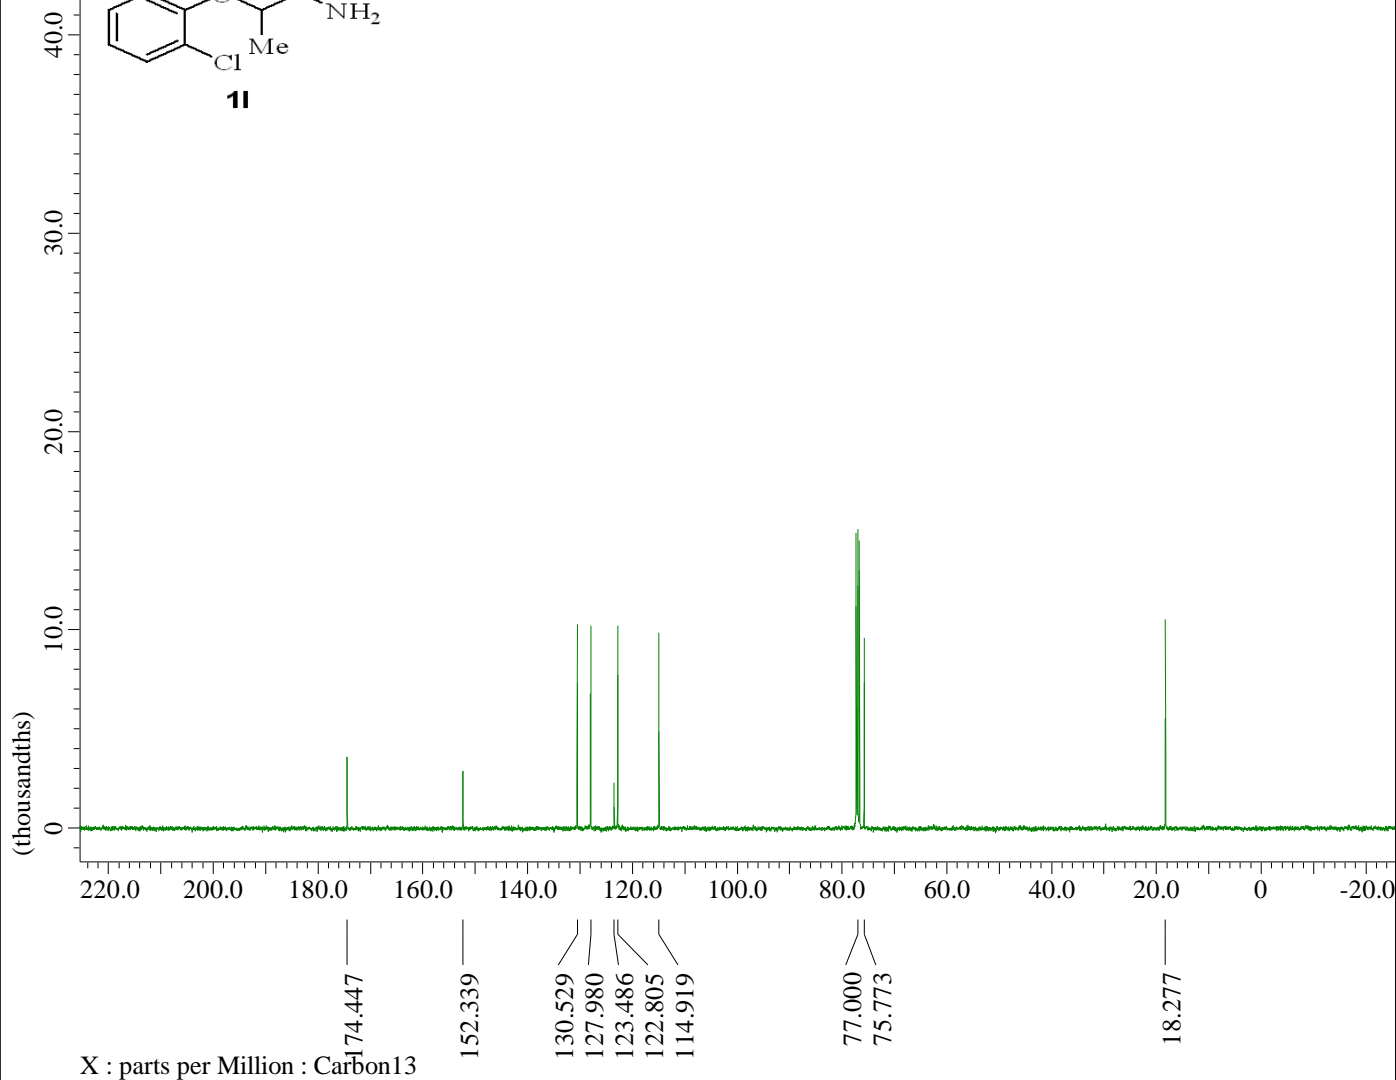

---- PROCESSING PARAMETERS ----  
 sexp( 2.0[Hz], 0.0[s] )  
 trapezoid( 0[%], 0[%], 80[%], 100[%] )  
 zerofill( 1 )  
 fft( 1, TRUE, TRUE )  
 machinephase  
 ppm

Derived from: LK1027NEW\_Carbon-1-1.jdf

Filename = LK1027NEW\_Carbo  
 Author = delta  
 Experiment = carbon.jxp  
 Sample\_Id = LK1027NEW  
 Solvent = CHLOROFORM-D  
 Actual\_Start\_Time = 31-OCT-2016 16:  
 Revision\_Time = 10-AUG-2017 17:

Comment = single pulse de  
 Data\_Format = 1D COMPLEX  
 Dim\_Size = 26214  
 Dim\_Title = Carbon13  
 Dim\_Units = [ppm]  
 Dimensions = X  
 Spectrometer = JNM-ECZ400S/L1

Field\_Strength = 9.389766[T] (40  
 X\_Acq\_Duration = 1.03809024[s]  
 X\_Domain = 13C  
 X\_Freq = 100.52530333[MH  
 X\_Offset = 100[ppm]  
 X\_Points = 32768  
 X\_Prescans = 4  
 X\_Resolution = 0.96330739[Hz]  
 X\_Sweep = 31.56565657[kHz  
 X\_Sweep\_Clipped = 25.25252525[kHz  
 Irr\_Domain = Proton  
 Irr\_Freq = 399.78219838[MH  
 Irr\_Offset = 5[ppm]  
 Clipped = FALSE  
 Scans = 302  
 Total\_Scans = 302

Relaxation\_Delay = 2[s]  
 Recvr\_Gain = 50  
 Temp\_Get = 14.4[dC]  
 X\_90\_Width = 8.8[us]  
 X\_Acq\_Time = 1.03809024[s]  
 X\_Angle = 30[deg]  
 X\_Atn = 3.4[dB]  
 X\_Pulse = 2.93333333[us]

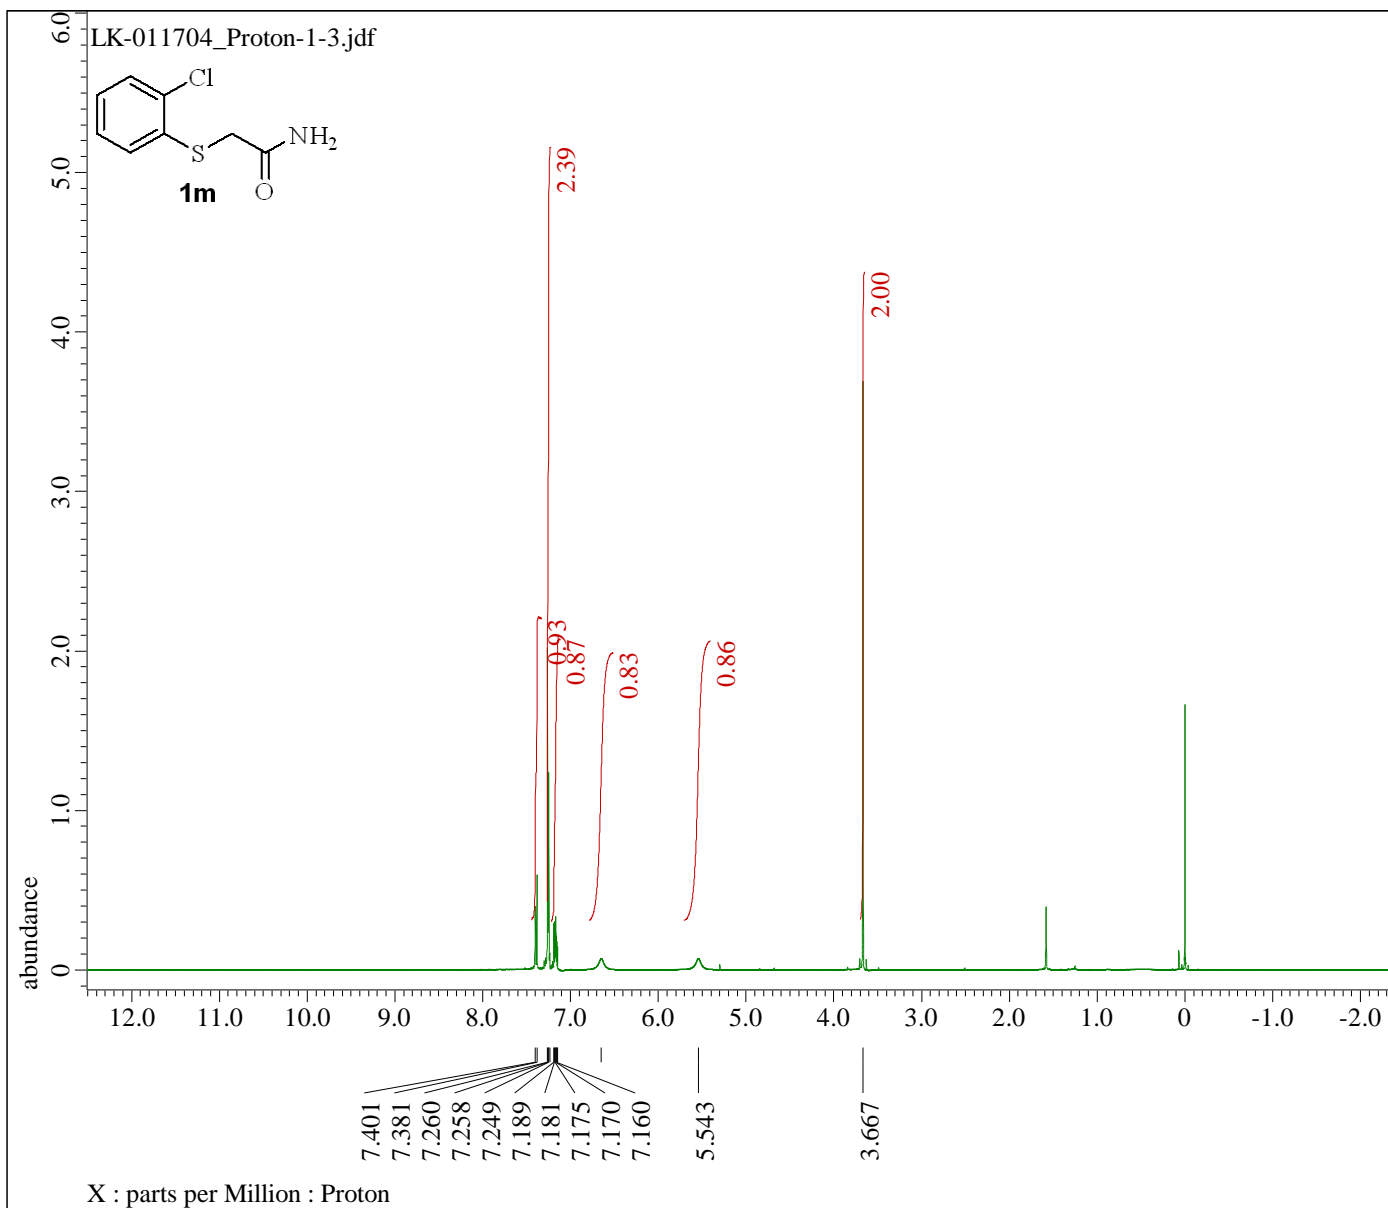

---- PROCESSING PARAMETERS ----  
 sexp( 0.2[Hz], 0.0[s] )  
 trapezoid( 0[%], 0[%], 80[%], 100[%] )  
 zerofill( 1 )  
 fft( 1, TRUE, TRUE )  
 machinephase  
 ppm  
 Derived from: LK-011704\_Proton-1-1.jdf

Filename = LK-011704\_Proton-1  
 Author = delta  
 Experiment = proton.jxp  
 Sample\_Id = LK-011704  
 Solvent = CHLOROFORM-D  
 Actual\_Start\_Time = 17-JAN-2017 18:02:  
 Revision\_Time = 10-AUG-2017 15:29:

Comment = single\_pulse  
 Data\_Format = 1D COMPLEX  
 Dim\_Size = 13107  
 Dim\_Title = Proton  
 Dim\_Units = [ppm]  
 Dimensions = X  
 Spectrometer = JNM-ECZ400S/L1

Field\_Strength = 9.389766[T] (400[M  
 X\_Acq\_Duration = 2.18628096[s]  
 X\_Domain = 1H  
 X\_Freq = 399.78219838[MHz]  
 X\_Offset = 5[ppm]  
 X\_Points = 16384  
 X\_Prescans = 1  
 X\_Resolution = 0.45739775[Hz]  
 X\_Sweep = 7.4940048[kHz]  
 X\_Sweep\_Clippped = 5.99520384[kHz]  
 Irr\_Domain = Proton  
 Irr\_Freq = 399.78219838[MHz]  
 Irr\_Offset = 5[ppm]  
 Tri\_Domain = Proton  
 Tri\_Freq = 399.78219838[MHz]  
 Tri\_Offset = 5[ppm]  
 Clipped = FALSE  
 Scans = 8  
 Total\_Scans = 8

Relaxation\_Delay = 5[s]  
 Recvr\_Gain = 66  
 Temp\_Get = 23.8[dC]  
 X\_90\_Width = 9.5[us]  
 X\_Acq\_Time = 2.18628096[s]

LK-011704\_Carbon-1-3.jdf

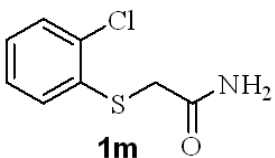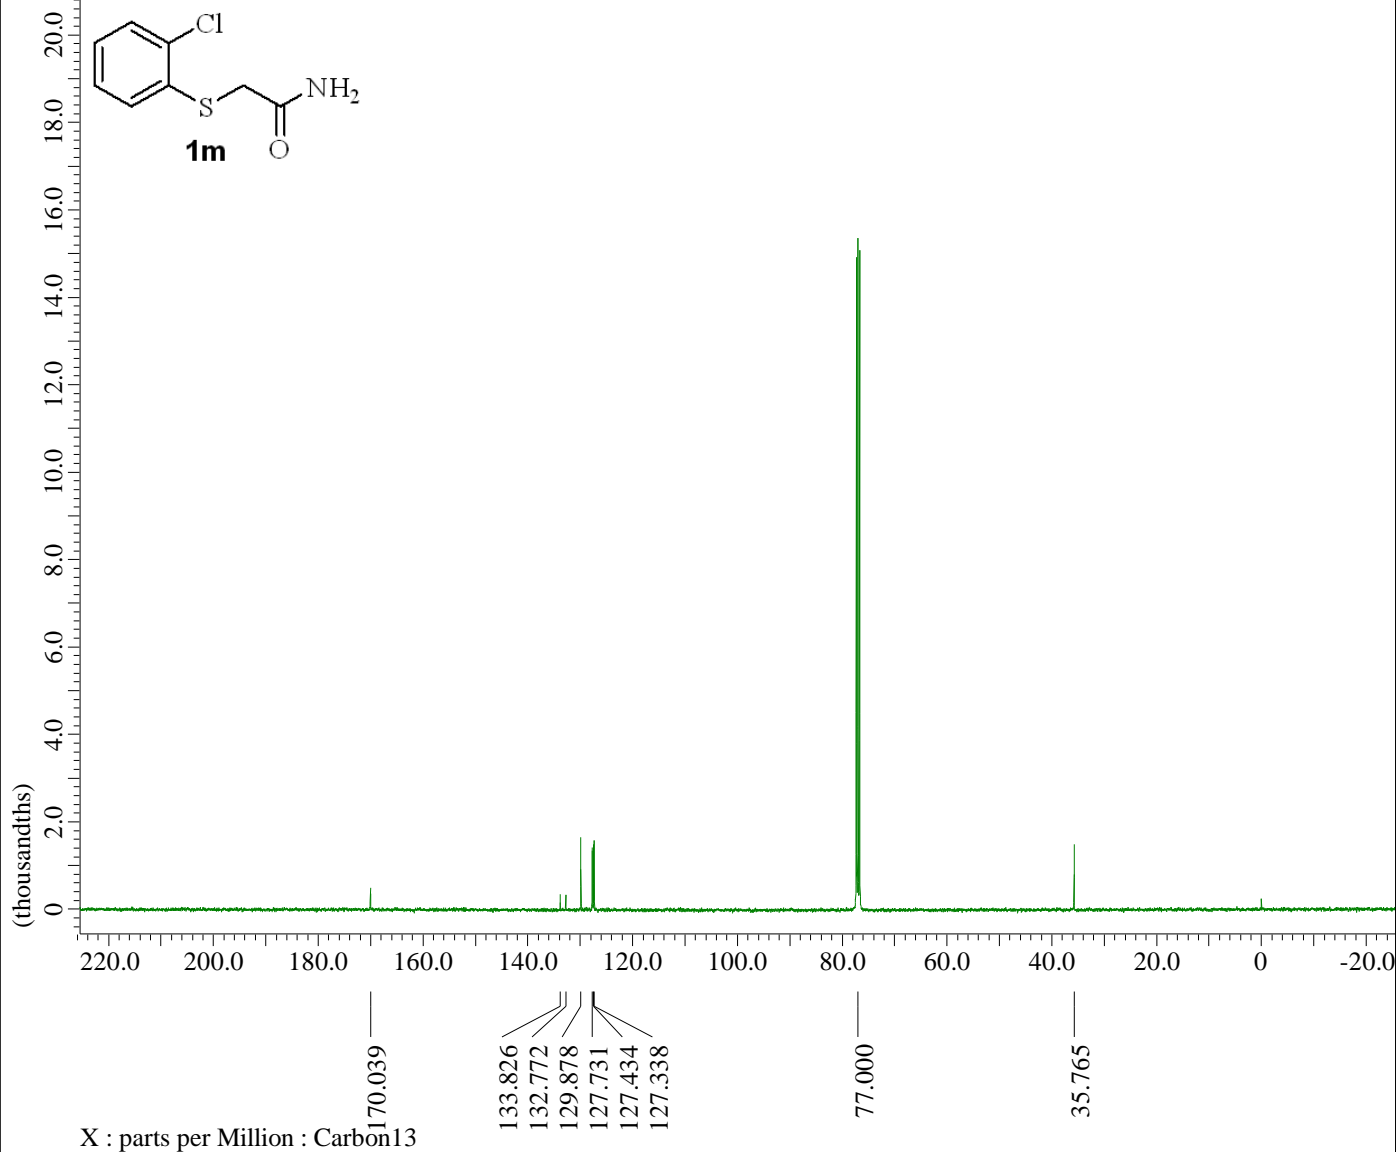

---- PROCESSING PARAMETERS ----  
 sexp( 2.0[Hz], 0.0[s] )  
 trapezoid( 0[%], 0[%], 80[%], 100[%] )  
 zerofill( 1 )  
 fft( 1, TRUE, TRUE )  
 machinephase  
 ppm

Derived from: LK-011704\_Carbon-1-1.jdf

Filename = LK-011704\_Carbon-1-1.jdf  
 Author = delta  
 Experiment = carbon.jxp  
 Sample\_Id = LK-011704  
 Solvent = CHLOROFORM-D  
 Actual\_Start\_Time = 18-JAN-2017 04:40  
 Revision\_Time = 10-AUG-2017 15:40

Comment = single pulse de  
 Data\_Format = 1D COMPLEX  
 Dim\_Size = 26214  
 Dim\_Title = Carbon13  
 Dim\_Units = [ppm]  
 Dimensions = X  
 Spectrometer = JNM-ECZ400S/L1

Field\_Strength = 9.389766[T] (400 MHz)  
 X\_Acq\_Duration = 1.03809024[s]  
 X\_Domain = 13C  
 X\_Freq = 100.52530333[MHz]  
 X\_Offset = 100[ppm]  
 X\_Points = 32768  
 X\_Prescans = 4  
 X\_Resolution = 0.96330739[Hz]  
 X\_Sweep = 31.56565657[kHz]  
 X\_Sweep\_Clipped = 25.25252525[kHz]  
 Irr\_Domain = Proton  
 Irr\_Freq = 399.78219838[MHz]  
 Irr\_Offset = 5[ppm]  
 Clipped = TRUE  
 Scans = 2400  
 Total\_Scans = 2400

Relaxation\_Delay = 2[s]  
 Recvr\_Gain = 50  
 Temp\_Get = 17[dC]  
 X\_90\_Width = 8.8[us]  
 X\_Acq\_Time = 1.03809024[s]  
 X\_Angle = 30[deg]  
 X\_Atn = 3.4[dB]  
 X\_Pulse = 2.93333333[us]

LK050703\_Proton-1-3.jdf

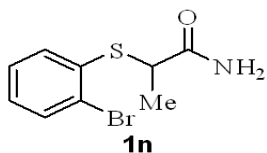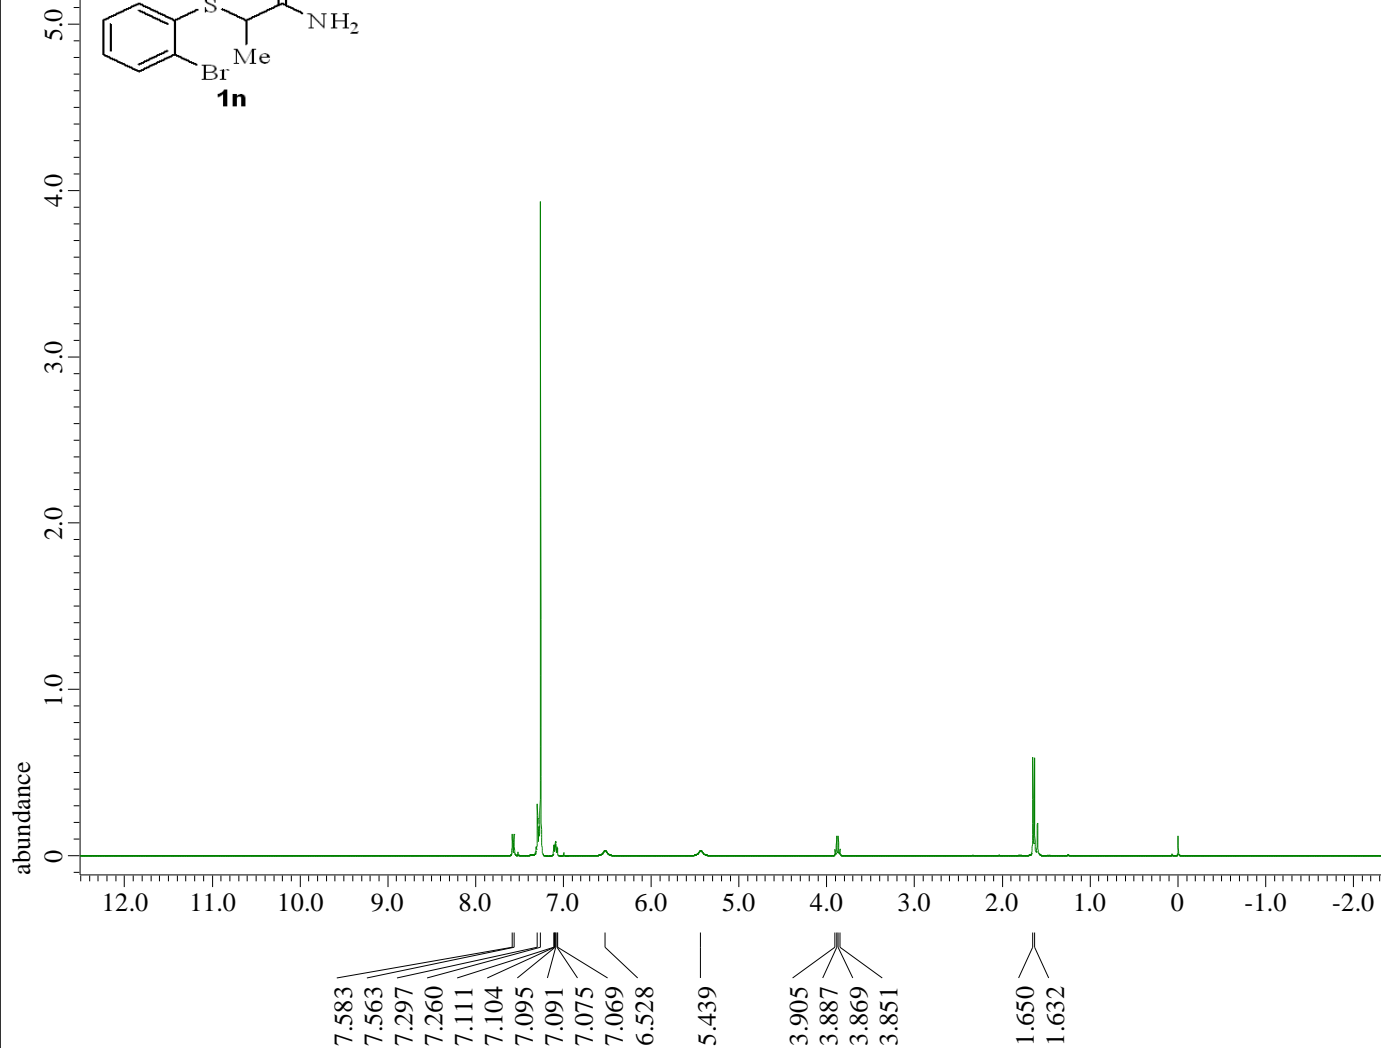

---- PROCESSING PARAMETERS ----  
sexp( 0.2[Hz], 0.0[s] )  
trapezoid( 0[%], 0[%], 80[%], 100[%] )  
zerofill( 1 )  
fft( 1, TRUE, TRUE )  
machinephase  
ppm

Derived from: LK050703\_Proton-1-1.jdf

Filename = LK050703\_Proton-1-1.jdf  
Author = delta  
Experiment = proton.jxp  
Sample\_Id = LK050703  
Solvent = CHLOROFORM-D  
Actual\_Start\_Time = 7-MAY-2017 17:29:54  
Revision\_Time = 9-AUG-2017 11:45:32

Comment = single\_pulse  
Data\_Format = 1D COMPLEX  
Dim\_Size = 13107  
Dim\_Title = Proton  
Dim\_Units = [ppm]  
Dimensions = X  
Spectrometer = JNM-ECZ400S/L1

Field\_Strength = 9.389766[T] (400[M])  
X\_Acq\_Duration = 2.18628096[s]  
X\_Domain = 1H  
X\_Freq = 399.78219838[MHz]  
X\_Offset = 5[ppm]  
X\_Points = 16384  
X\_Prescans = 1  
X\_Resolution = 0.45739775[Hz]  
X\_Sweep = 7.4940048[kHz]  
X\_Sweep\_Clippped = 5.99520384[kHz]  
Irr\_Domain = Proton  
Irr\_Freq = 399.78219838[MHz]  
Irr\_Offset = 5[ppm]  
Tri\_Domain = Proton  
Tri\_Freq = 399.78219838[MHz]  
Tri\_Offset = 5[ppm]  
Clipped = FALSE  
Scans = 8  
Total\_Scans = 8

Relaxation\_Delay = 5[s]  
Recvr\_Gain = 56  
Temp\_Get = 22.2[dc]  
X\_90\_Width = 9.5[us]  
X\_Acq\_Time = 2.18628096[s]

LK050703\_Carbon-1-3.jdf

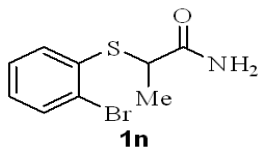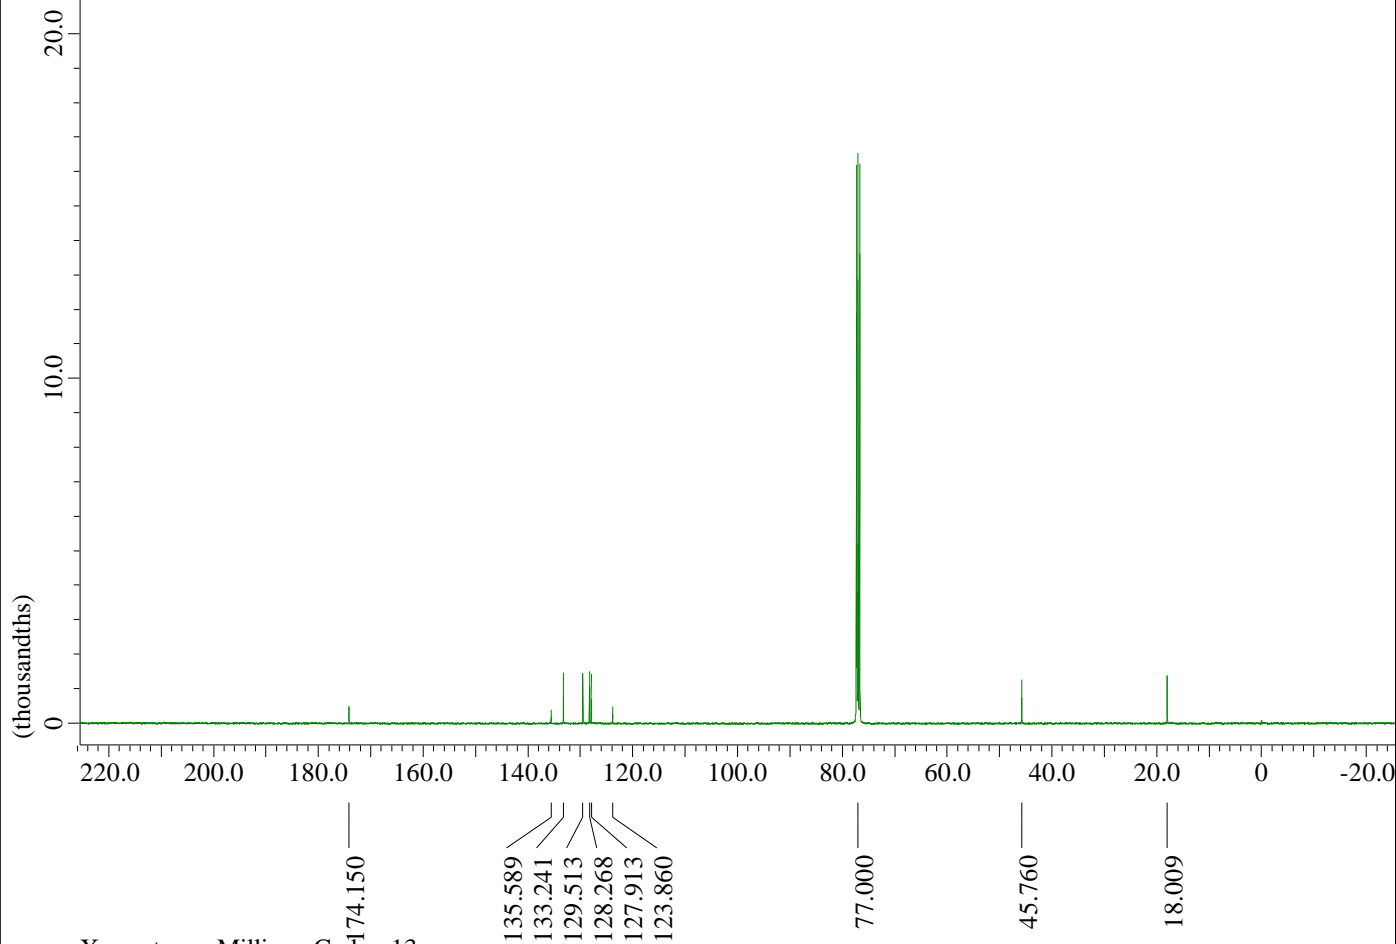

---- PROCESSING PARAMETERS ----  
sexp( 2.0[Hz], 0.0[s] )  
trapezoid( 0[%], 0[%], 80[%], 100[%] )  
zerofill( 1 )  
fft( 1, TRUE, TRUE )  
machinephase  
ppm

Derived from: LK050703\_Carbon-1-1.jdf

Filename = LK050703\_Carbon-1-1.jdf  
Author = delta  
Experiment = carbon.jxp  
Sample\_Id = LK050703  
Solvent = CHLOROFORM-D  
Actual\_Start\_Time = 8-MAY-2017 01:11:00  
Revision\_Time = 9-AUG-2017 11:00:00

Comment = single pulse de  
Data\_Format = 1D COMPLEX  
Dim\_Size = 26214  
Dim\_Title = Carbon13  
Dim\_Units = [ppm]  
Dimensions = X  
Spectrometer = JNM-ECZ400S/L1

Field\_Strength = 9.389766[T] (400 MHz)  
X\_Acq\_Duration = 1.03809024[s]  
X\_Domain = 13C  
X\_Freq = 100.52530333[MHz]  
X\_Offset = 100[ppm]  
X\_Points = 32768  
X\_Prescans = 4  
X\_Resolution = 0.96330739[Hz]  
X\_Sweep = 31.56565657[kHz]  
X\_Sweep\_Clipped = 25.25252525[kHz]  
Irr\_Domain = Proton  
Irr\_Freq = 399.78219838[MHz]  
Irr\_Offset = 5[ppm]  
Clipped = FALSE  
Scans = 6000  
Total\_Scans = 6000

Relaxation\_Delay = 2[s]  
Recvr\_Gain = 50  
Temp\_Get = 23[dC]  
X\_90\_Width = 8.8[us]  
X\_Acq\_Time = 1.03809024[s]  
X\_Angle = 30[deg]  
X\_Atn = 3.4[dB]  
X\_Pulse = 2.93333333[us]



LK1130-03\_Proton-1-3.jdf

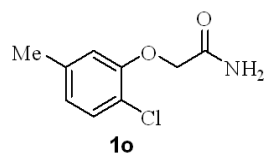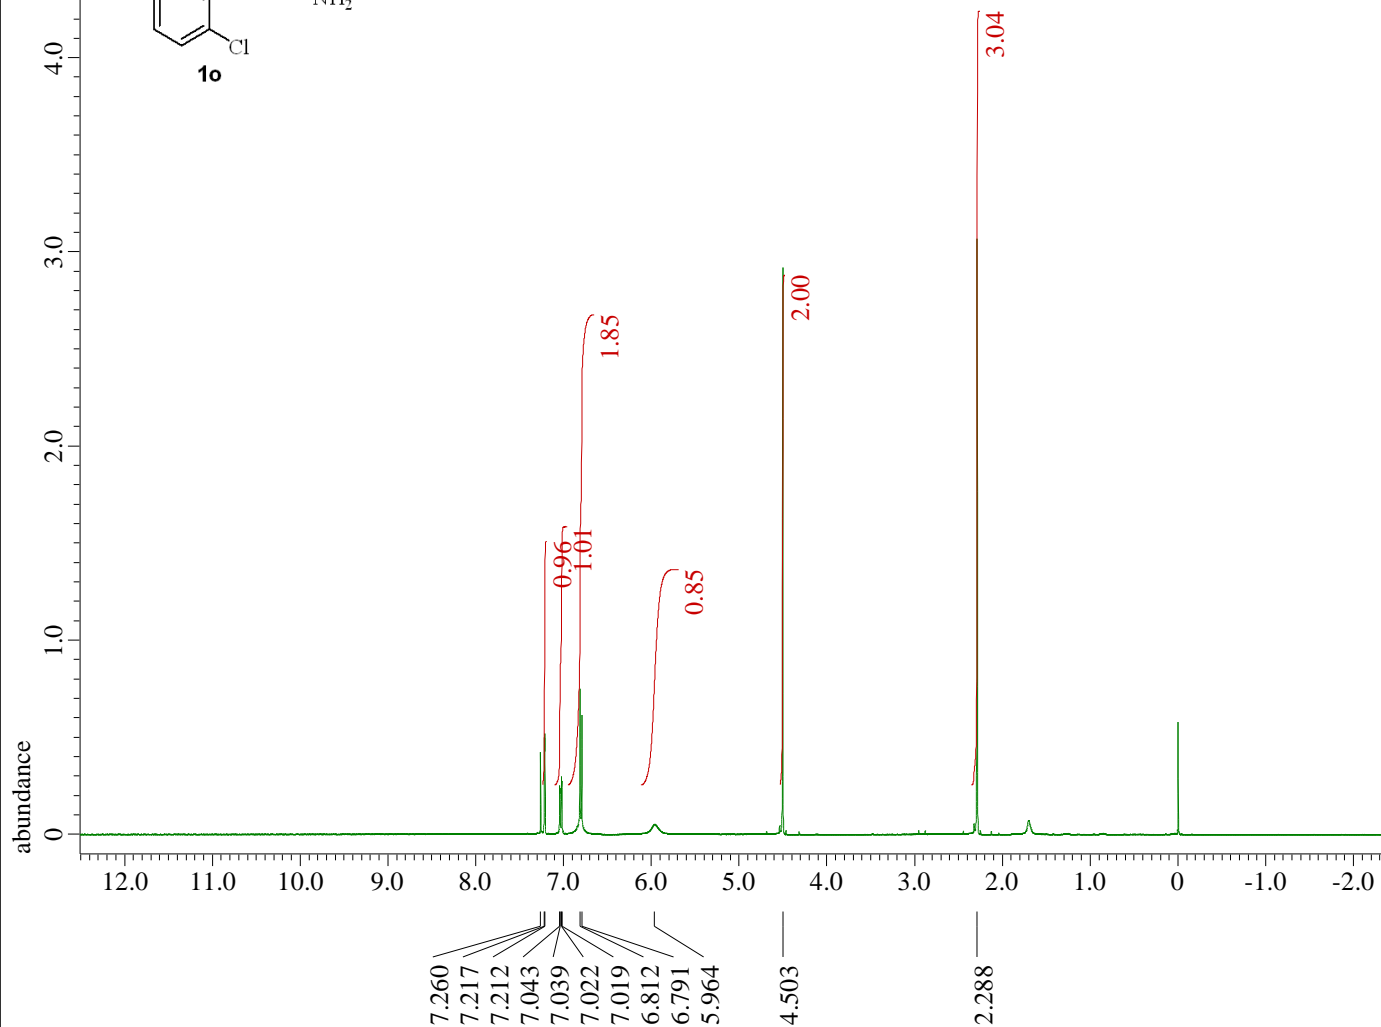

X : parts per Million : Proton



---- PROCESSING PARAMETERS ----  
 sexp( 0.2[Hz], 0.0[s] )  
 trapezoid( 0[%], 0[%], 80[%], 100[%] )  
 zerofill( 1 )  
 fft( 1, TRUE, TRUE )  
 machinephase  
 ppm

Derived from: LK1130-03\_Proton-1-1.jdf

Filename = LK1130-03\_Proton-1  
 Author = delta  
 Experiment = proton.jxp  
 Sample\_Id = LK1130-03  
 Solvent = CHLOROFORM-D  
 Actual\_Start\_Time = 30-NOV-2016 18:02:  
 Revision\_Time = 10-AUG-2017 15:10:

Comment = single\_pulse  
 Data\_Format = 1D COMPLEX  
 Dim\_Size = 13107  
 Dim\_Title = Proton  
 Dim\_Units = [ppm]  
 Dimensions = X  
 Spectrometer = JNM-ECZ400S/L1

Field\_Strength = 9.389766[T] (400[M  
 X\_Acq\_Duration = 2.18628096[s]  
 X\_Domain = 1H  
 X\_Freq = 399.78219838[MHz]  
 X\_Offset = 5[ppm]  
 X\_Points = 16384  
 X\_Prescans = 1  
 X\_Resolution = 0.45739775[Hz]  
 X\_Sweep = 7.4940048[kHz]  
 X\_Sweep\_Clippped = 5.99520384[kHz]  
 Irr\_Domain = Proton  
 Irr\_Freq = 399.78219838[MHz]  
 Irr\_Offset = 5[ppm]  
 Tri\_Domain = Proton  
 Tri\_Freq = 399.78219838[MHz]  
 Tri\_Offset = 5[ppm]  
 Clipped = FALSE  
 Scans = 8  
 Total\_Scans = 8

Relaxation\_Delay = 5[s]  
 Recvr\_Gain = 56  
 Temp\_Get = 25.2[dc]  
 X\_90\_Width = 9.5[us]  
 X\_Acq\_Time = 2.18628096[s]

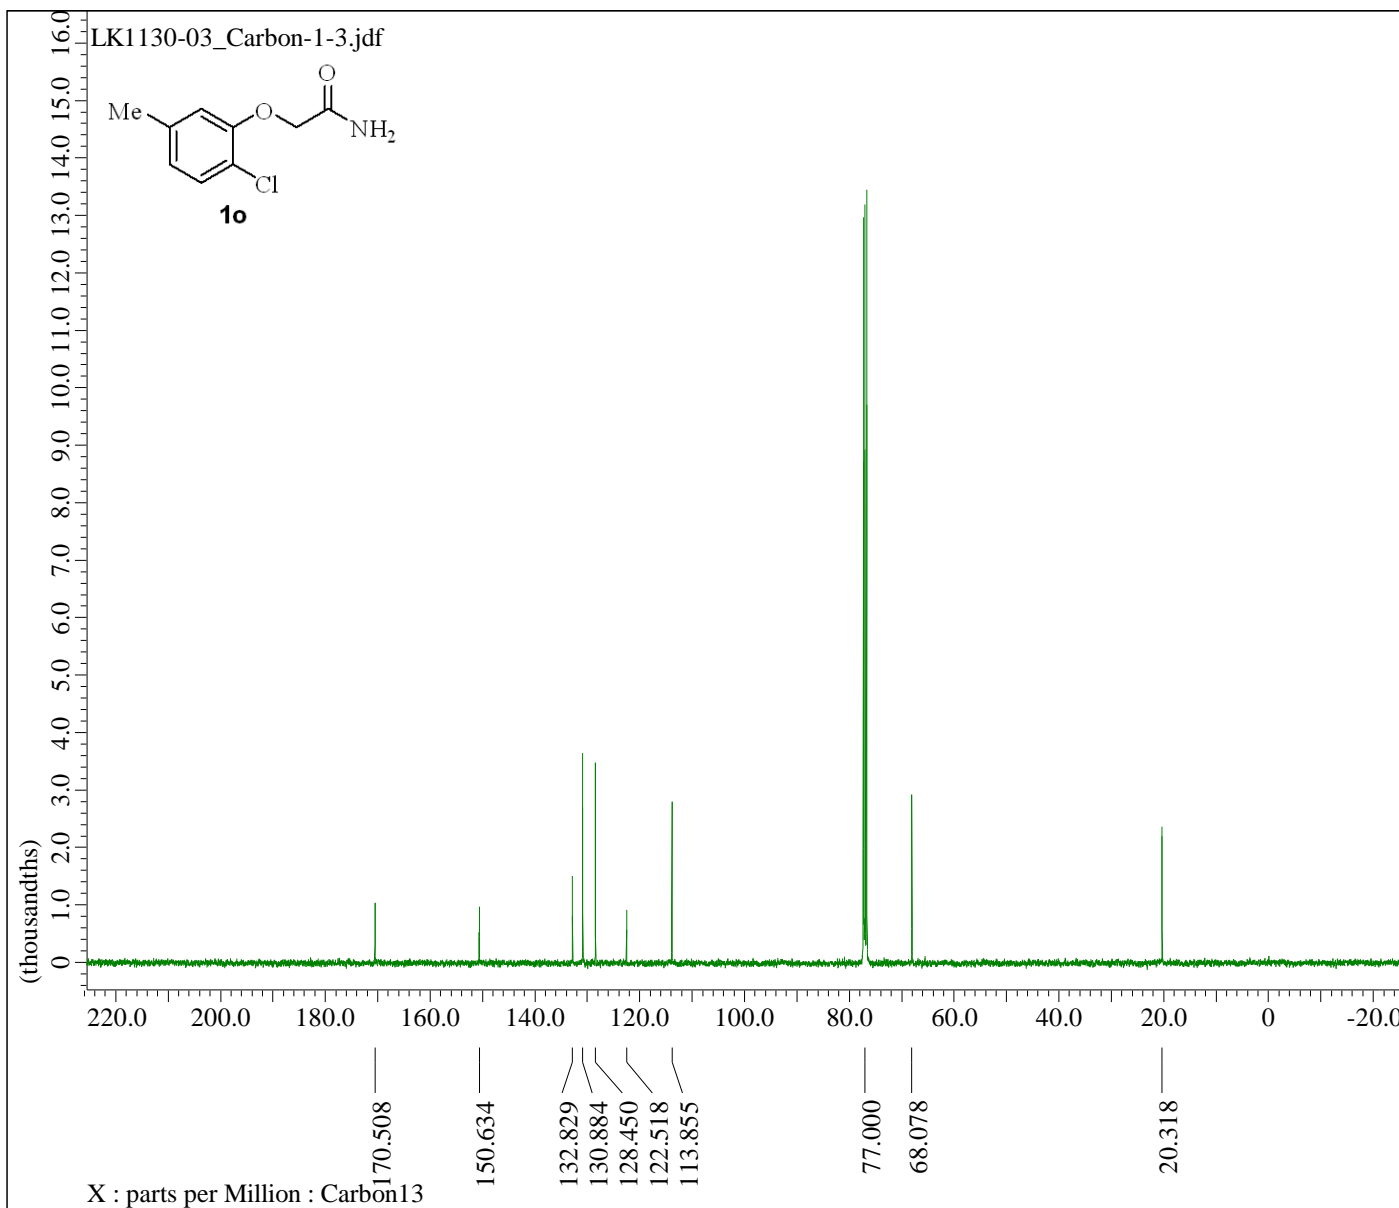

---- PROCESSING PARAMETERS ----  
 sexp( 2.0[Hz], 0.0[s] )  
 trapezoid( 0[%], 0[%], 80[%], 100[%] )  
 zerofill( 1 )  
 fft( 1, TRUE, TRUE )  
 machinephase  
 ppm  
 Derived from: LK1130-03\_Carbon-1-1.jdf

Filename = LK1130-03\_Carbon-1-1.jdf  
 Author = delta  
 Experiment = carbon.jxp  
 Sample\_Id = LK1130-03  
 Solvent = CHLOROFORM-D  
 Actual\_Start\_Time = 30-NOV-2016 19:54:11  
 Revision\_Time = 10-AUG-2017 15:23:11

Comment = single pulse de  
 Data\_Format = 1D COMPLEX  
 Dim\_Size = 26214  
 Dim\_Title = Carbon13  
 Dim\_Units = [ppm]  
 Dimensions = X  
 Spectrometer = JNM-ECZ400S/L1

Field\_Strength = 9.389766[T] (400 MHz)  
 X\_Acq\_Duration = 1.03809024[s]  
 X\_Domain = 13C  
 X\_Freq = 100.52530333[MHz]  
 X\_Offset = 100[ppm]  
 X\_Points = 32768  
 X\_Prescans = 4  
 X\_Resolution = 0.96330739[Hz]  
 X\_Sweep = 31.56565657[kHz]  
 X\_Sweep\_Clipped = 25.25252525[kHz]  
 Irr\_Domain = Proton  
 Irr\_Freq = 399.78219838[MHz]  
 Irr\_Offset = 5[ppm]  
 Clipped = FALSE  
 Scans = 1024  
 Total\_Scans = 1024

Relaxation\_Delay = 2[s]  
 Recvr\_Gain = 50  
 Temp\_Get = 24.4[dC]  
 X\_90\_Width = 8.8[us]  
 X\_Acq\_Time = 1.03809024[s]  
 X\_Angle = 30[deg]  
 X\_Atn = 3.4[dB]  
 X\_Pulse = 2.93333333[us]

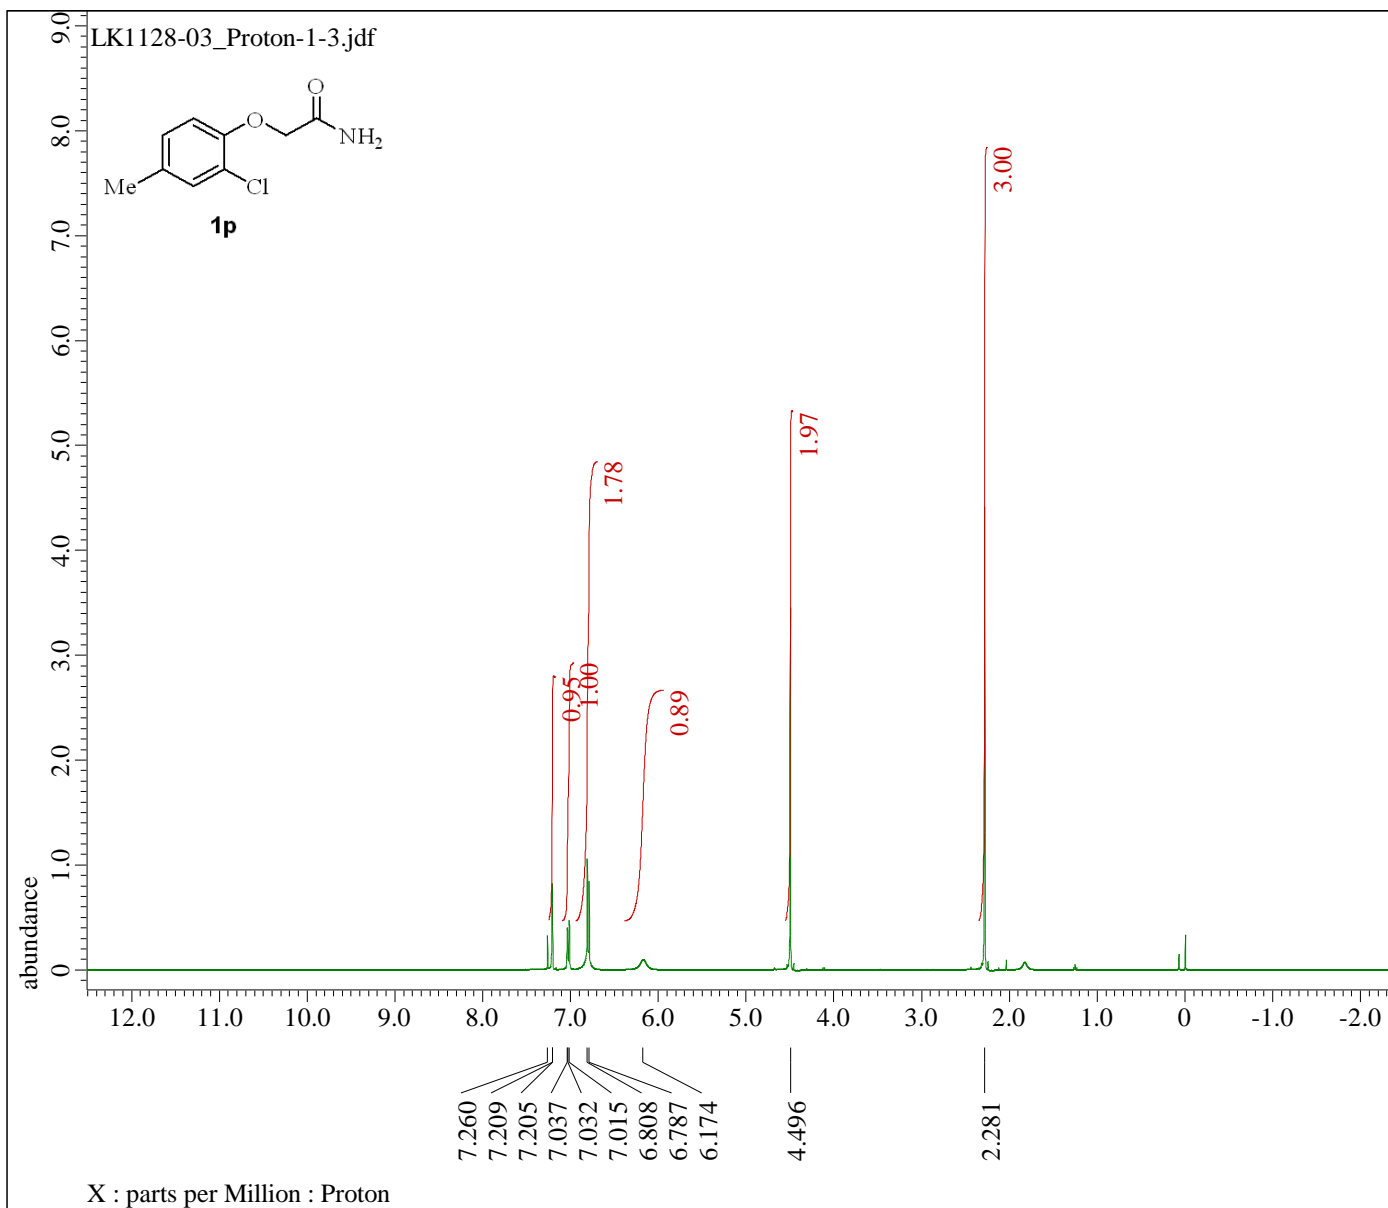

---- PROCESSING PARAMETERS ----  
 sexp( 0.2[Hz], 0.0[s] )  
 trapezoid( 0[%], 0[%], 80[%], 100[%] )  
 zerofill( 1 )  
 fft( 1, TRUE, TRUE )  
 machinephase  
 ppm

Derived from: LK1128-03\_Proton-1-1.jdf

Filename = LK1128-03\_Proton-1-1.jdf  
 Author = delta  
 Experiment = proton.jxp  
 Sample\_Id = LK1128-03  
 Solvent = CHLOROFORM-D  
 Actual\_Start\_Time = 28-NOV-2016 16:42:00  
 Revision\_Time = 10-AUG-2017 17:42:00

Comment = single\_pulse  
 Data\_Format = 1D COMPLEX  
 Dim\_Size = 13107  
 Dim\_Title = Proton  
 Dim\_Units = [ppm]  
 Dimensions = X  
 Spectrometer = JNM-ECZ400S/L1

Field\_Strength = 9.389766[T] (400[M]  
 X\_Acq\_Duration = 2.18628096[s]  
 X\_Domain = 1H  
 X\_Freq = 399.78219838[MHz]  
 X\_Offset = 5[ppm]  
 X\_Points = 16384  
 X\_Prescans = 1  
 X\_Resolution = 0.45739775[Hz]  
 X\_Sweep = 7.4940048[kHz]  
 X\_Sweep\_Clipped = 5.99520384[kHz]  
 Irr\_Domain = Proton  
 Irr\_Freq = 399.78219838[MHz]  
 Irr\_Offset = 5[ppm]  
 Tri\_Domain = Proton  
 Tri\_Freq = 399.78219838[MHz]  
 Tri\_Offset = 5[ppm]  
 Clipped = FALSE  
 Scans = 8  
 Total\_Scans = 8

Relaxation\_Delay = 5[s]  
 Recvr\_Gain = 56  
 Temp\_Get = 27[dC]  
 X\_90\_Width = 9.5[us]  
 X\_Acq\_Time = 2.18628096[s]

LK1128-03\_Carbon-1-3.jdf

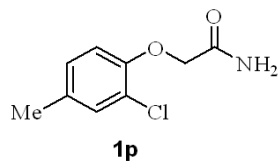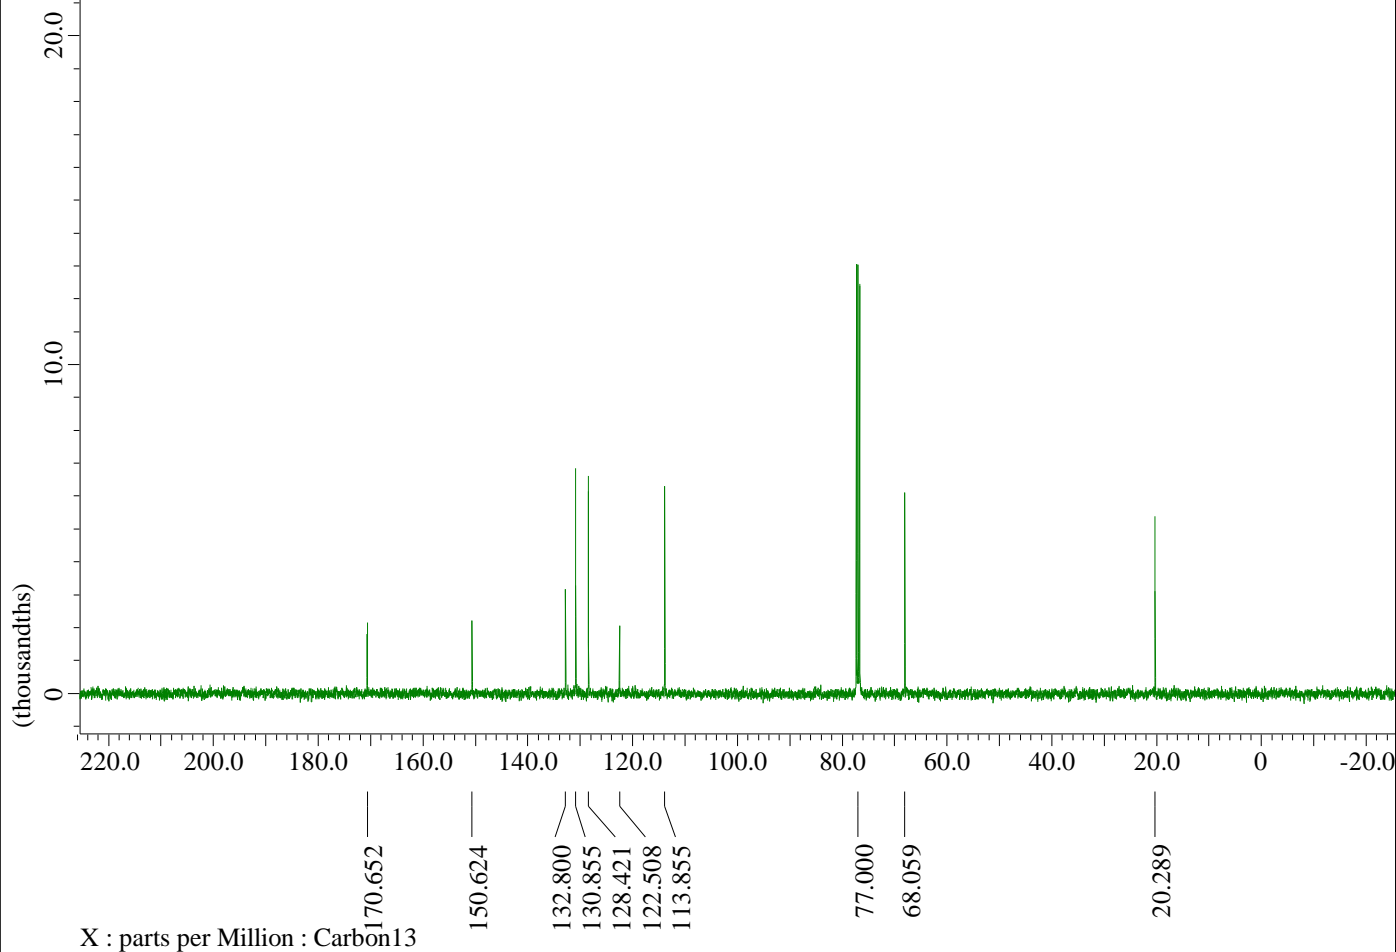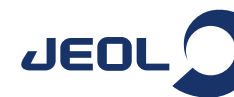

---- PROCESSING PARAMETERS ----  
 sexp( 2.0[Hz], 0.0[s] )  
 trapezoid( 0[%], 0[%], 80[%], 100[%] )  
 zerofill( 1 )  
 fft( 1, TRUE, TRUE )  
 machinephase  
 ppm  
 Derived from: LK1128-03\_Carbon-1-1.jdf

|                   |                            |
|-------------------|----------------------------|
| Filename          | = LK1128-03_Carbon-1-1.jdf |
| Author            | = delta                    |
| Experiment        | = carbon.jxp               |
| Sample_Id         | = LK1128-03                |
| Solvent           | = CHLOROFORM-D             |
| Actual_Start_Time | = 28-NOV-2016 18:00        |
| Revision_Time     | = 10-AUG-2017 17:00        |
| Comment           | = single pulse de          |
| Data_Format       | = 1D COMPLEX               |
| Dim_Size          | = 26214                    |
| Dim_Title         | = Carbon13                 |
| Dim_Units         | = [ppm]                    |
| Dimensions        | = X                        |
| Spectrometer      | = JNM-ECZ400S/L1           |
| Field_Strength    | = 9.389766[T] (400)        |
| X_Acq_Duration    | = 1.03809024[s]            |
| X_Domain          | = 13C                      |
| X_Freq            | = 100.52530333[MHz]        |
| X_Offset          | = 100[ppm]                 |
| X_Points          | = 32768                    |
| X_Prescans        | = 4                        |
| X_Resolution      | = 0.96330739[Hz]           |
| X_Sweep           | = 31.56565657[kHz]         |
| X_Sweep_Clip      | = 25.25252525[kHz]         |
| Irr_Domain        | = Proton                   |
| Irr_Freq          | = 399.78219838[MHz]        |
| Irr_Offset        | = 5[ppm]                   |
| Clipped           | = TRUE                     |
| Scans             | = 128                      |
| Total_Scans       | = 128                      |
| Relaxation_Delay  | = 2[s]                     |
| Recvr_Gain        | = 50                       |
| Temp_Get          | = 27.3[dC]                 |
| X_90_Width        | = 8.8[us]                  |
| X_Acq_Time        | = 1.03809024[s]            |
| X_Angle           | = 30[deg]                  |
| X_Atn             | = 3.4[dB]                  |
| X_Pulse           | = 2.93333333[us]           |

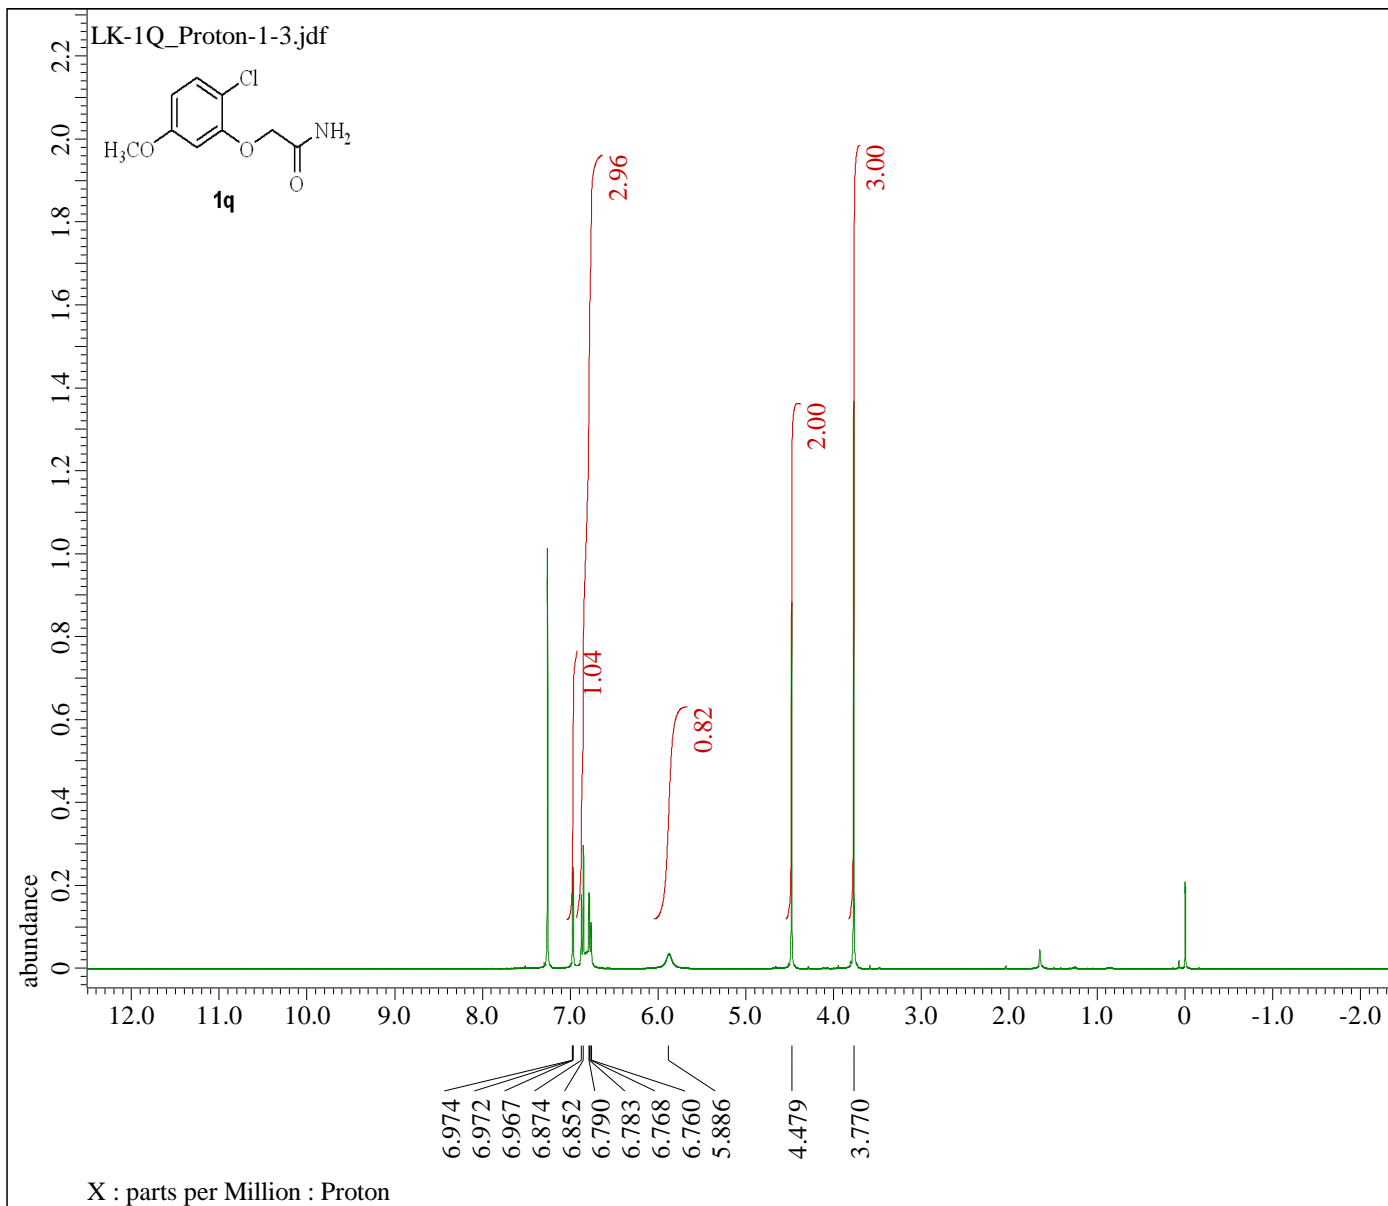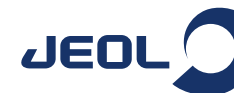

---- PROCESSING PARAMETERS ----  
 sexp( 0.2[Hz], 0.0[s] )  
 trapezoid( 0[%], 0[%], 80[%], 100[%] )  
 zerofill( 1 )  
 fft( 1, TRUE, TRUE )  
 machinephase  
 ppm

Derived from: LK-1Q\_Proton-1-1.jdf

Filename = LK-1Q\_Proton-1-3.jdf  
 Author = delta  
 Experiment = proton.jxp  
 Sample\_Id = LK-1Q  
 Solvent = CHLOROFORM-D  
 Actual\_Start\_Time = 11-AUG-2017 11:26:30  
 Revision\_Time = 11-AUG-2017 12:32:30

Comment = single\_pulse  
 Data\_Format = 1D COMPLEX  
 Dim\_Size = 13107  
 Dim\_Title = Proton  
 Dim\_Units = [ppm]  
 Dimensions = X  
 Spectrometer = JNM-ECZ400S/L1

Field\_Strength = 9.389766[T] (400[M])  
 X\_Acq\_Duration = 2.18628096[s]  
 X\_Domain = 1H  
 X\_Freq = 399.78219838[MHz]  
 X\_Offset = 5[ppm]  
 X\_Points = 16384  
 X\_Prescans = 1  
 X\_Resolution = 0.45739775[Hz]  
 X\_Sweep = 7.4940048[kHz]  
 X\_Sweep\_Clipped = 5.99520384[kHz]  
 Irr\_Domain = Proton  
 Irr\_Freq = 399.78219838[MHz]  
 Irr\_Offset = 5[ppm]  
 Tri\_Domain = Proton  
 Tri\_Freq = 399.78219838[MHz]  
 Tri\_Offset = 5[ppm]  
 Clipped = FALSE  
 Scans = 8  
 Total\_Scans = 8

Relaxation\_Delay = 5[s]  
 Recvr\_Gain = 56  
 Temp\_Get = 20.2[dC]  
 X\_90\_Width = 9.5[us]  
 X\_Acq\_Time = 2.18628096[s]

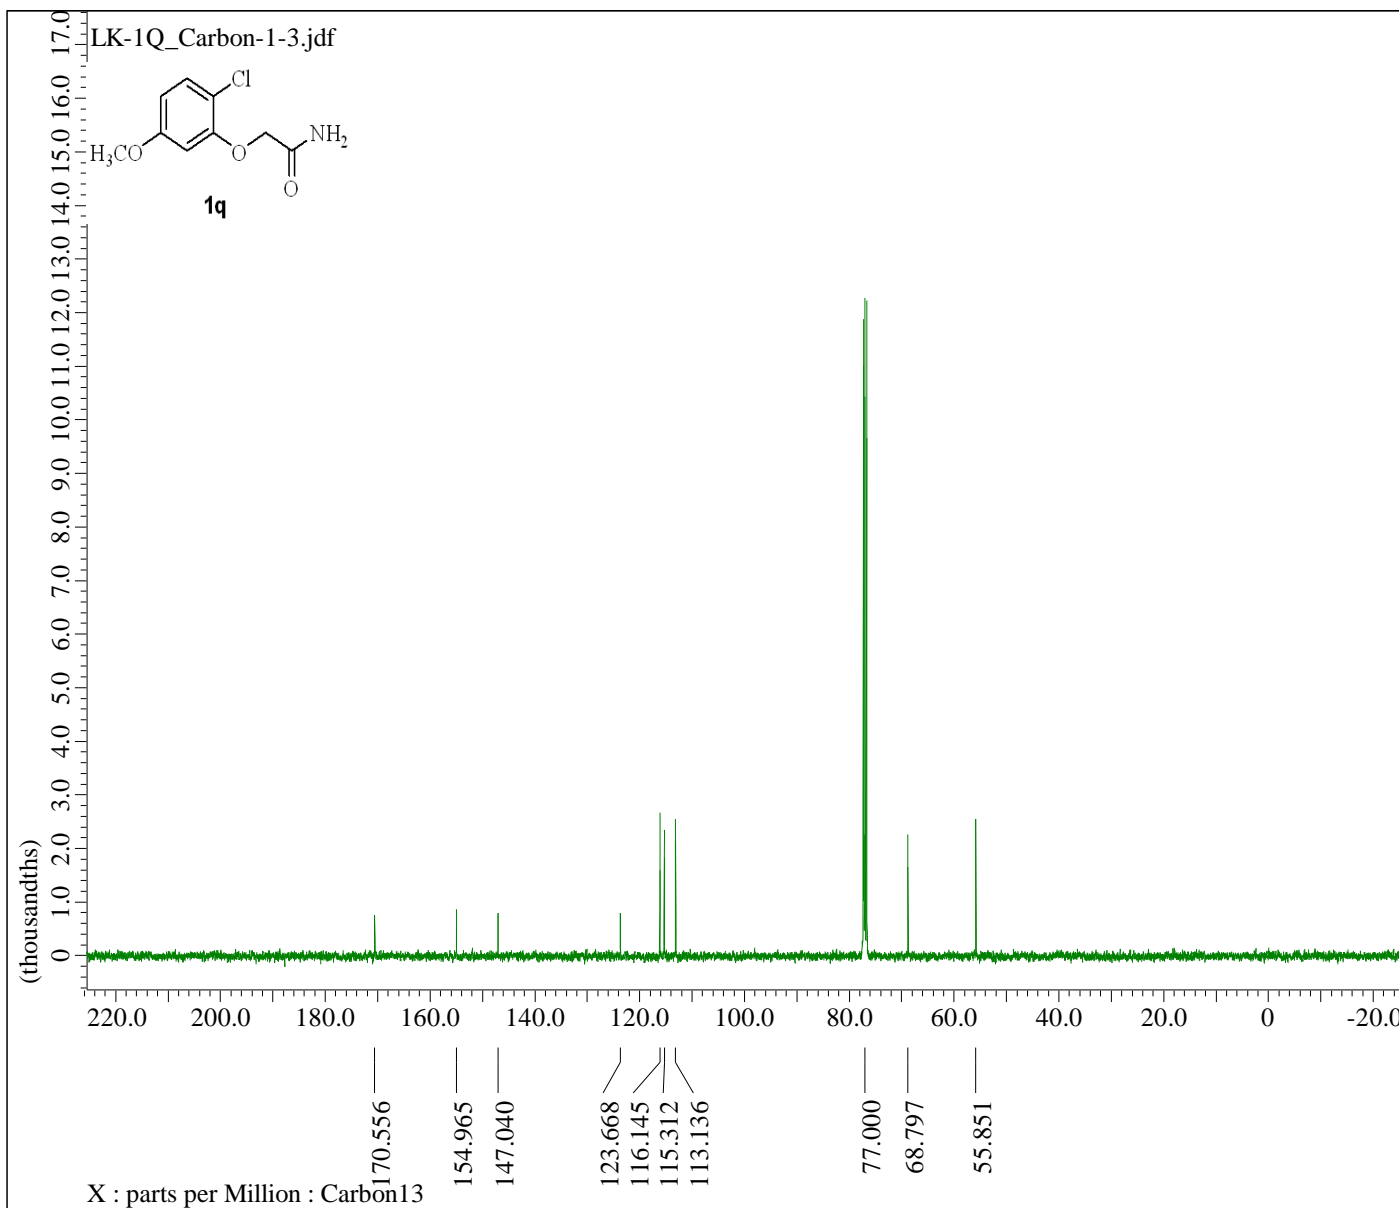

---- PROCESSING PARAMETERS ----  
 sexp( 2.0[Hz], 0.0[s] )  
 trapezoid( 0[%], 0[%], 80[%], 100[%] )  
 zerofill( 1 )  
 fft( 1, TRUE, TRUE )  
 machinephase  
 ppm  
 Derived from: LK-1Q\_Carbon-1-1.jdf

Filename = LK-1Q\_Carbon-1-  
 Author = delta  
 Experiment = carbon.jxp  
 Sample\_Id = LK-1Q  
 Solvent = CHLOROFORM-D  
 Actual\_Start\_Time = 11-AUG-2017 12:  
 Revision\_Time = 11-AUG-2017 12:

Comment = single pulse de  
 Data\_Format = 1D COMPLEX  
 Dim\_Size = 26214  
 Dim\_Title = Carbon13  
 Dim\_Units = [ppm]  
 Dimensions = X  
 Spectrometer = JNM-ECZ400S/L1

Field\_Strength = 9.389766[T] (40  
 X\_Acq\_Duration = 1.03809024[s]  
 X\_Domain = 13C  
 X\_Freq = 100.52530333[MH  
 X\_Offset = 100[ppm]  
 X\_Points = 32768  
 X\_Prescans = 4  
 X\_Resolution = 0.96330739[Hz]  
 X\_Sweep = 31.56565657[kHz]  
 X\_Sweep\_Clipped = 25.25252525[kHz]  
 Irr\_Domain = Proton  
 Irr\_Freq = 399.78219838[MH  
 Irr\_Offset = 5[ppm]  
 Clipped = FALSE  
 Scans = 468  
 Total\_Scans = 468

Relaxation\_Delay = 2[s]  
 Recvr\_Gain = 50  
 Temp\_Get = 20.4[dC]  
 X\_90\_Width = 8.8[us]  
 X\_Acq\_Time = 1.03809024[s]  
 X\_Angle = 30[deg]  
 X\_Atn = 3.4[dB]  
 X\_Pulse = 2.93333333[us]

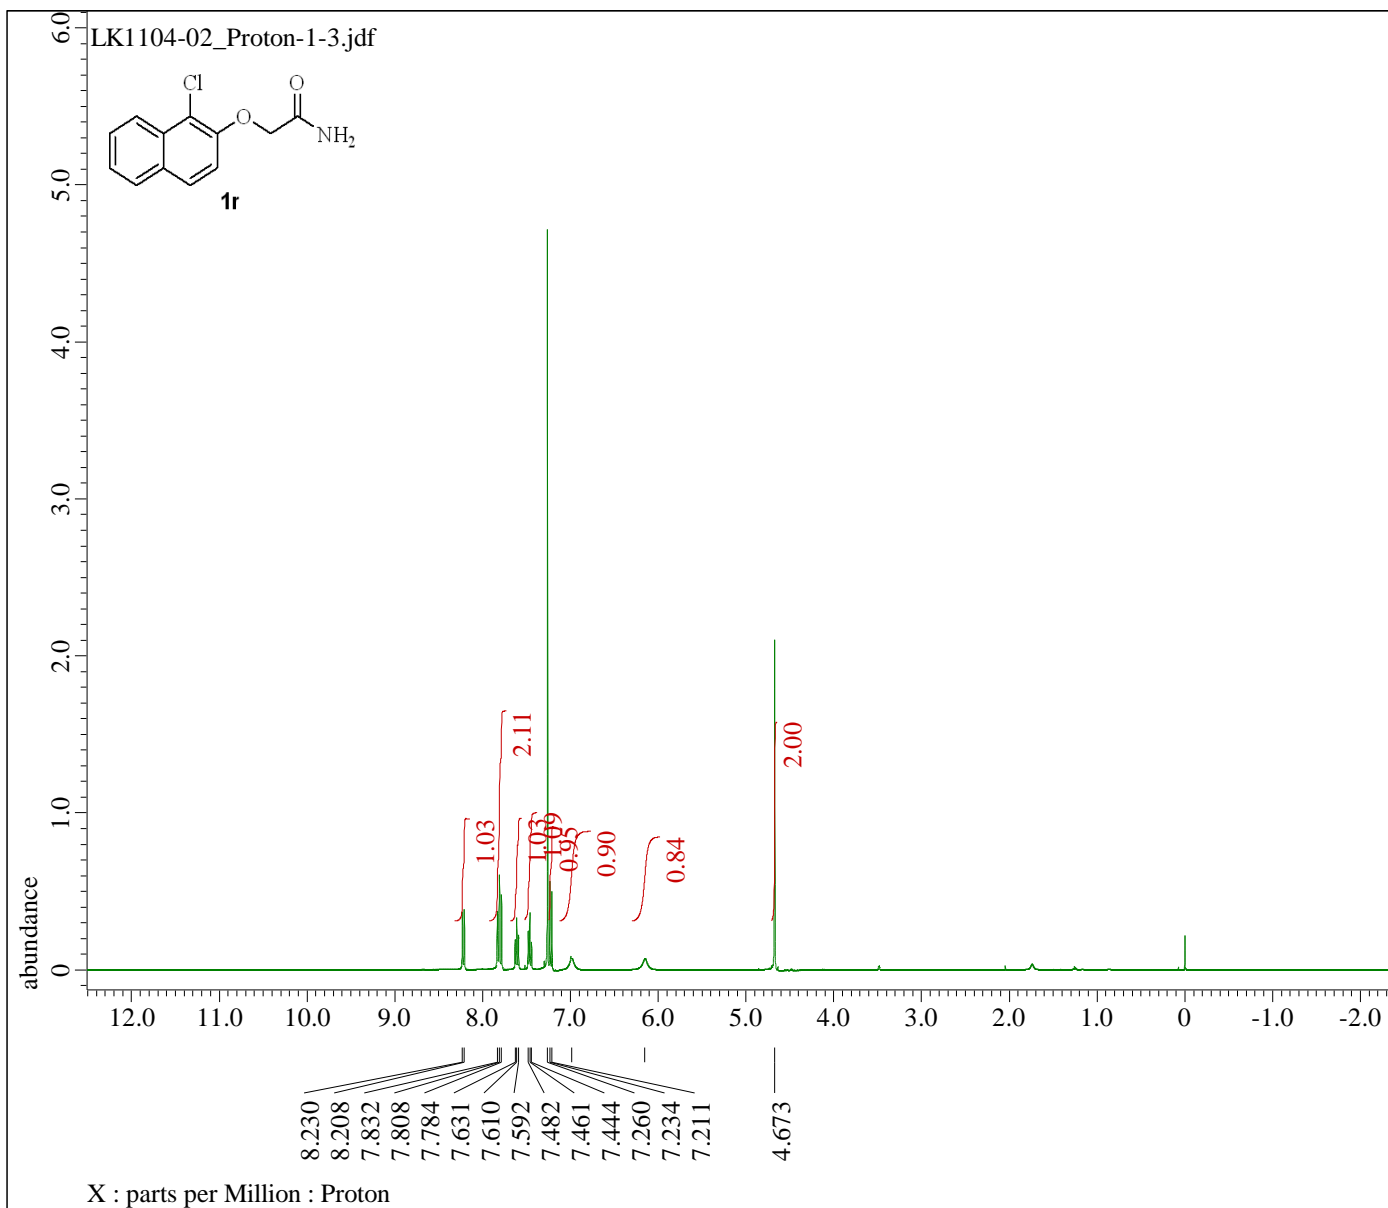

---- PROCESSING PARAMETERS ----  
 sexp( 0.2[Hz], 0.0[s] )  
 trapezoid( 0[%], 0[%], 80[%], 100[%] )  
 zerofill( 1 )  
 fft( 1, TRUE, TRUE )  
 machinephase  
 ppm  
 Derived from: LK1104-02\_Proton-1-1.jdf

Filename = LK1104-02\_Proton-1  
 Author = delta  
 Experiment = proton.jxp  
 Sample\_Id = LK1104-02  
 Solvent = CHLOROFORM-D  
 Actual\_Start\_Time = 14-NOV-2016 12:22:  
 Revision\_Time = 10-AUG-2017 15:18:

Comment = single\_pulse  
 Data\_Format = 1D COMPLEX  
 Dim\_Size = 13107  
 Dim\_Title = Proton  
 Dim\_Units = [ppm]  
 Dimensions = X  
 Spectrometer = JNM-ECZ400S/L1

Field\_Strength = 9.389766[T] (400[M  
 X\_Acq\_Duration = 2.18628096[s]  
 X\_Domain = 1H  
 X\_Freq = 399.78219838[MHz]  
 X\_Offset = 5[ppm]  
 X\_Points = 16384  
 X\_Prescans = 1  
 X\_Resolution = 0.45739775[Hz]  
 X\_Sweep = 7.4940048[kHz]  
 X\_Sweep\_Clippped = 5.99520384[kHz]  
 Irr\_Domain = Proton  
 Irr\_Freq = 399.78219838[MHz]  
 Irr\_Offset = 5[ppm]  
 Tri\_Domain = Proton  
 Tri\_Freq = 399.78219838[MHz]  
 Tri\_Offset = 5[ppm]  
 Clipped = FALSE  
 Scans = 8  
 Total\_Scans = 8

Relaxation\_Delay = 5[s]  
 Recvr\_Gain = 56  
 Temp\_Get = 16.9[dC]  
 X\_90\_Width = 9.5[us]  
 X\_Acq\_Time = 2.18628096[s]

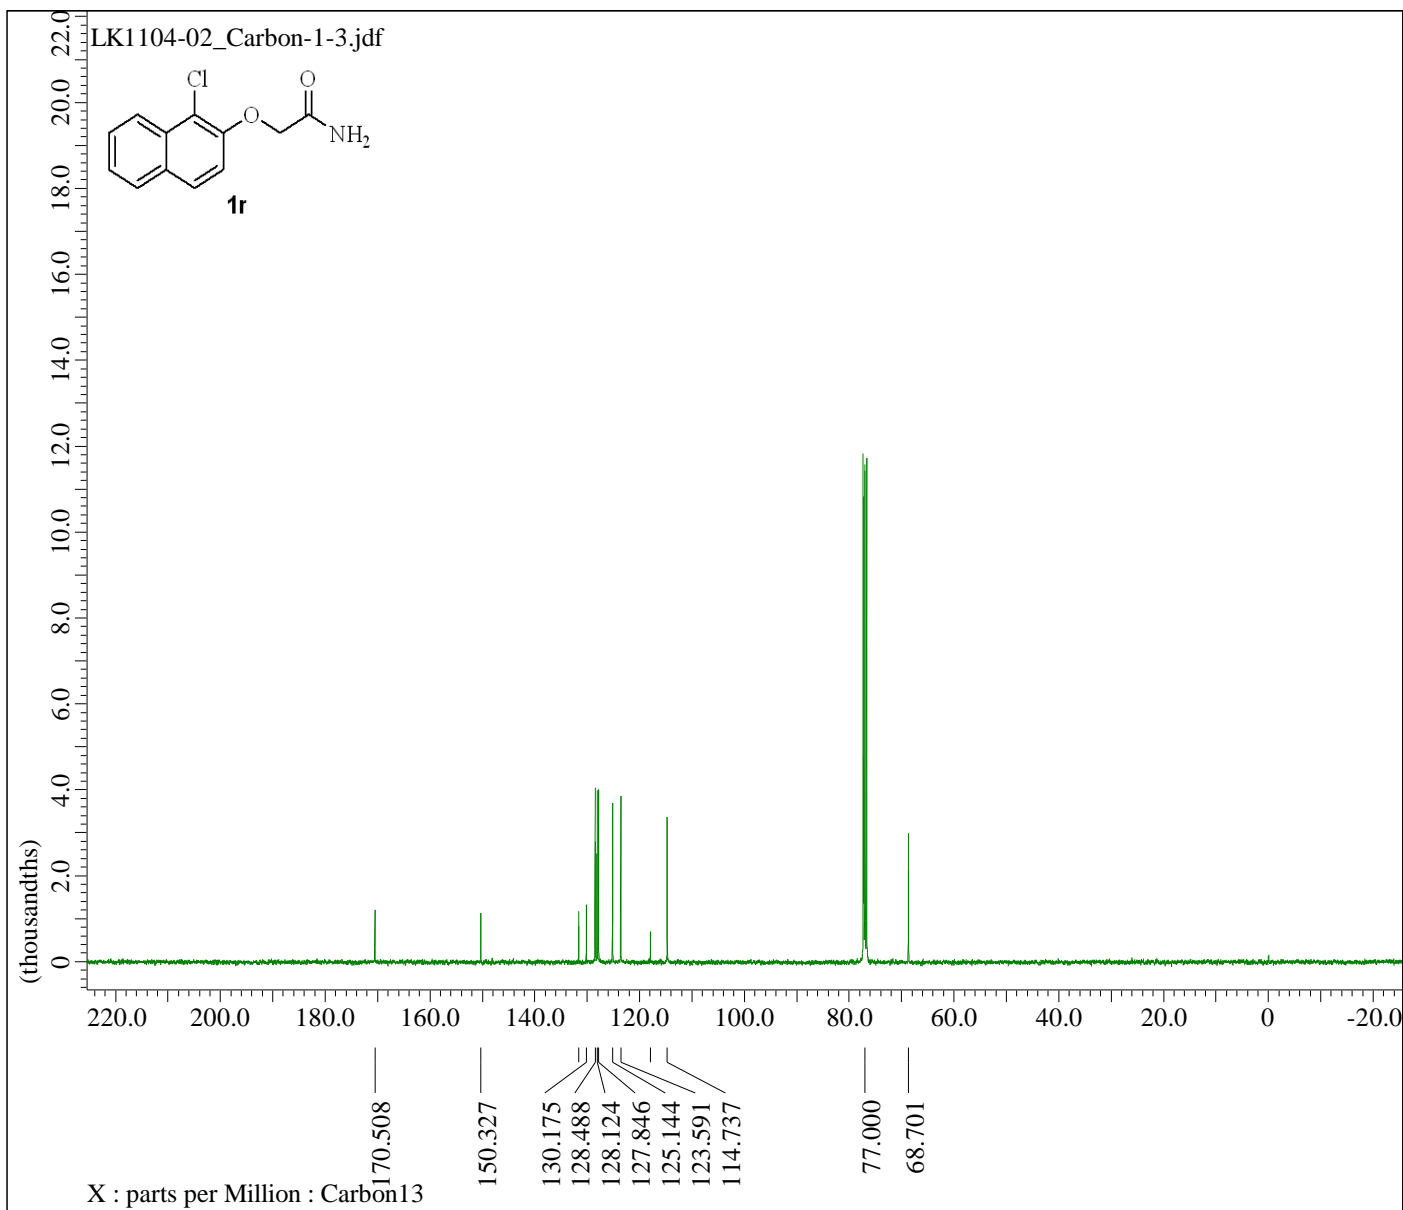

```

---- PROCESSING PARAMETERS ----
sexp( 2.0[Hz], 0.0[s] )
trapezoid( 0[%], 0[%], 80[%], 100[%] )
zerofill( 1 )
fft( 1, TRUE, TRUE )
machinephase
ppm

```

Derived from: LK1104-02\_Carbon-1-1.jdf

```

Filename      = LK1104-02_Carbo
Author        = delta
Experiment    = carbon.jxp
Sample_Id     = LK1104-02
Solvent       = CHLOROFORM-D
Actual_Start_Time = 14-NOV-2016 15:
Revision_Time  = 10-AUG-2017 15:

```

```

Comment       = single pulse de
Data_Format   = 1D COMPLEX
Dim_Size      = 26214
Dim_Title     = Carbon13
Dim_Units     = [ppm]
Dimensions    = X
Spectrometer  = JNM-ECZ400S/L1

```

```

Field_Strength = 9.389766[T] (40
X_Acq_Duration = 1.03809024[s]
X_Domain       = 13C
X_Freq         = 100.52530333[MH
X_Offset       = 100[ppm]
X_Points       = 32768
X_Prescans     = 4
X_Resolution   = 0.96330739[Hz]
X_Sweep        = 31.56565657[kHz]
X_Sweep_Clipped = 25.25252525[kHz]
Irr_Domain     = Proton
Irr_Freq       = 399.78219838[MH
Irr_Offset     = 5[ppm]
Clipped        = FALSE
Scans          = 1201
Total_Scans    = 1201

```

```

Relaxation_Delay = 2[s]
Recvr_Gain       = 50
Temp_Get         = 23.1[dC]
X_90_Width      = 8.8[us]
X_Acq_Time       = 1.03809024[s]
X_Angle         = 30[deg]
X_Atn           = 3.4[dB]
X_Pulse         = 2.93333333[us]

```



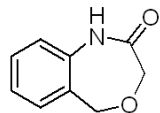

2a

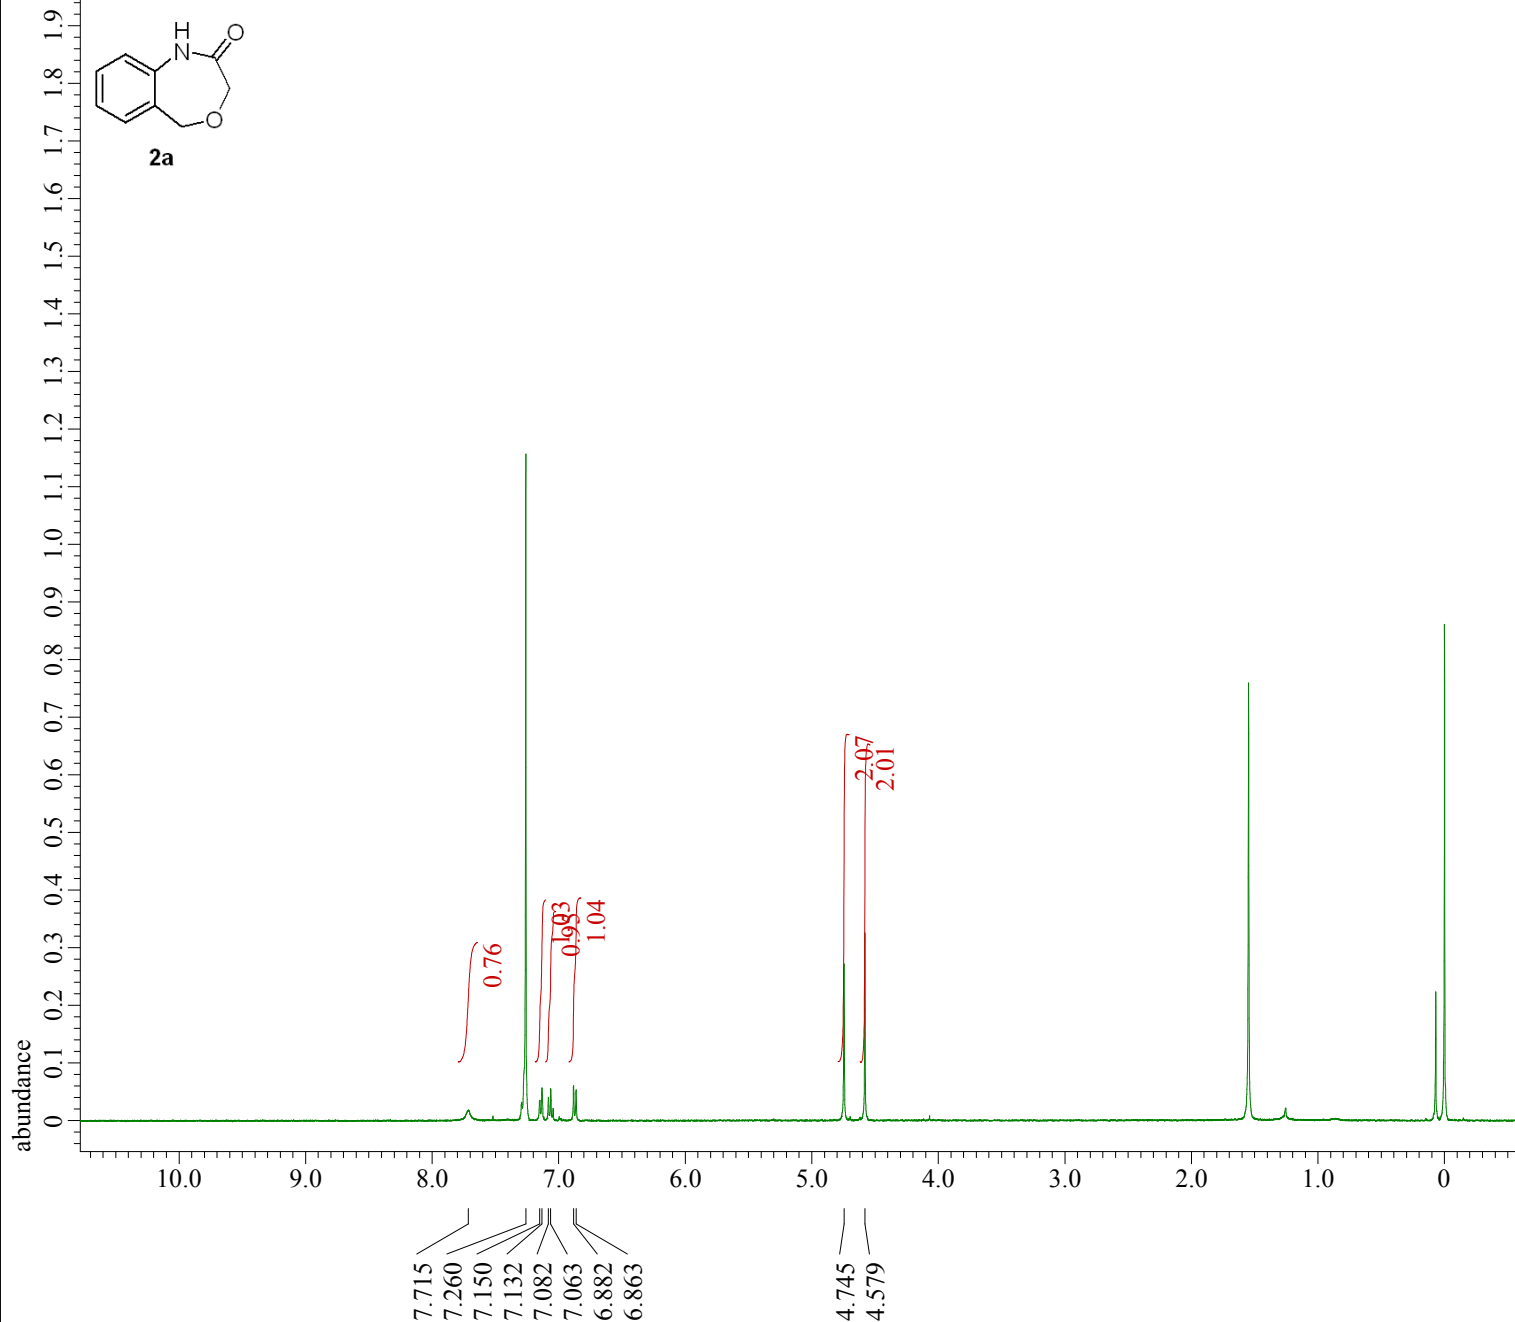

X : parts per Million : Proton

---- PROCESSING PARAMETERS ----  
sexp( 0.2[Hz], 0.0[s] )  
trapezoid( 0[%], 0[%], 80[%], 100[%] )  
zerofill( 1 )  
fft( 1, TRUE, TRUE )  
machinephase  
ppm

Derived from: LK031407\_Proton-1-1.jdf

Filename = LK031407\_Proton-1-3.j  
Author = delta  
Experiment = proton.jxp  
Sample Id = LK031407  
Solvent = CHLOROFORM-D  
Actual\_Start\_Time = 21-MAR-2017 17:33:48  
Revision\_Time = 4-AUG-2017 16:54:55

Comment = single\_pulse  
Data\_Format = 1D COMPLEX  
Dim\_Size = 13107  
Dim\_Title = Proton  
Dim\_Units = [ppm]  
Dimensions = X  
Spectrometer = JNM-ECZ400S/L1

Field\_Strength = 9.389766[T] (400[MHz])  
X\_Acq\_Duration = 2.18628096[s]  
X\_Domain = 1H  
X\_Freq = 399.78219838[MHz]  
X\_Offset = 5[ppm]  
X\_Points = 16384  
X\_Prescans = 1  
X\_Resolution = 0.45739775[Hz]  
X\_Sweep = 7.4940048[kHz]  
X\_Sweep\_Clippped = 5.99520384[kHz]  
Irr\_Domain = Proton  
Irr\_Freq = 399.78219838[MHz]  
Irr\_Offset = 5[ppm]  
Tri\_Domain = Proton  
Tri\_Freq = 399.78219838[MHz]  
Tri\_Offset = 5[ppm]  
Clipped = FALSE  
Scans = 8  
Total\_Scans = 8

Relaxation\_Delay = 5[s]  
Recvr\_Gain = 66  
Temp\_Get = 23.9[dC]  
X\_90\_Width = 9.5[us]  
X\_Acq\_Time = 2.18628096[s]  
X\_Angle = 45[deg]  
X\_Atn = 2[dB]  
X\_Pulse = 4.75[us]  
Irr\_Mode = Off  
Tri\_Mode = Off  
Dante\_Loop = 500  
Dante\_Presat = FALSE

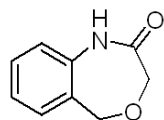

2a

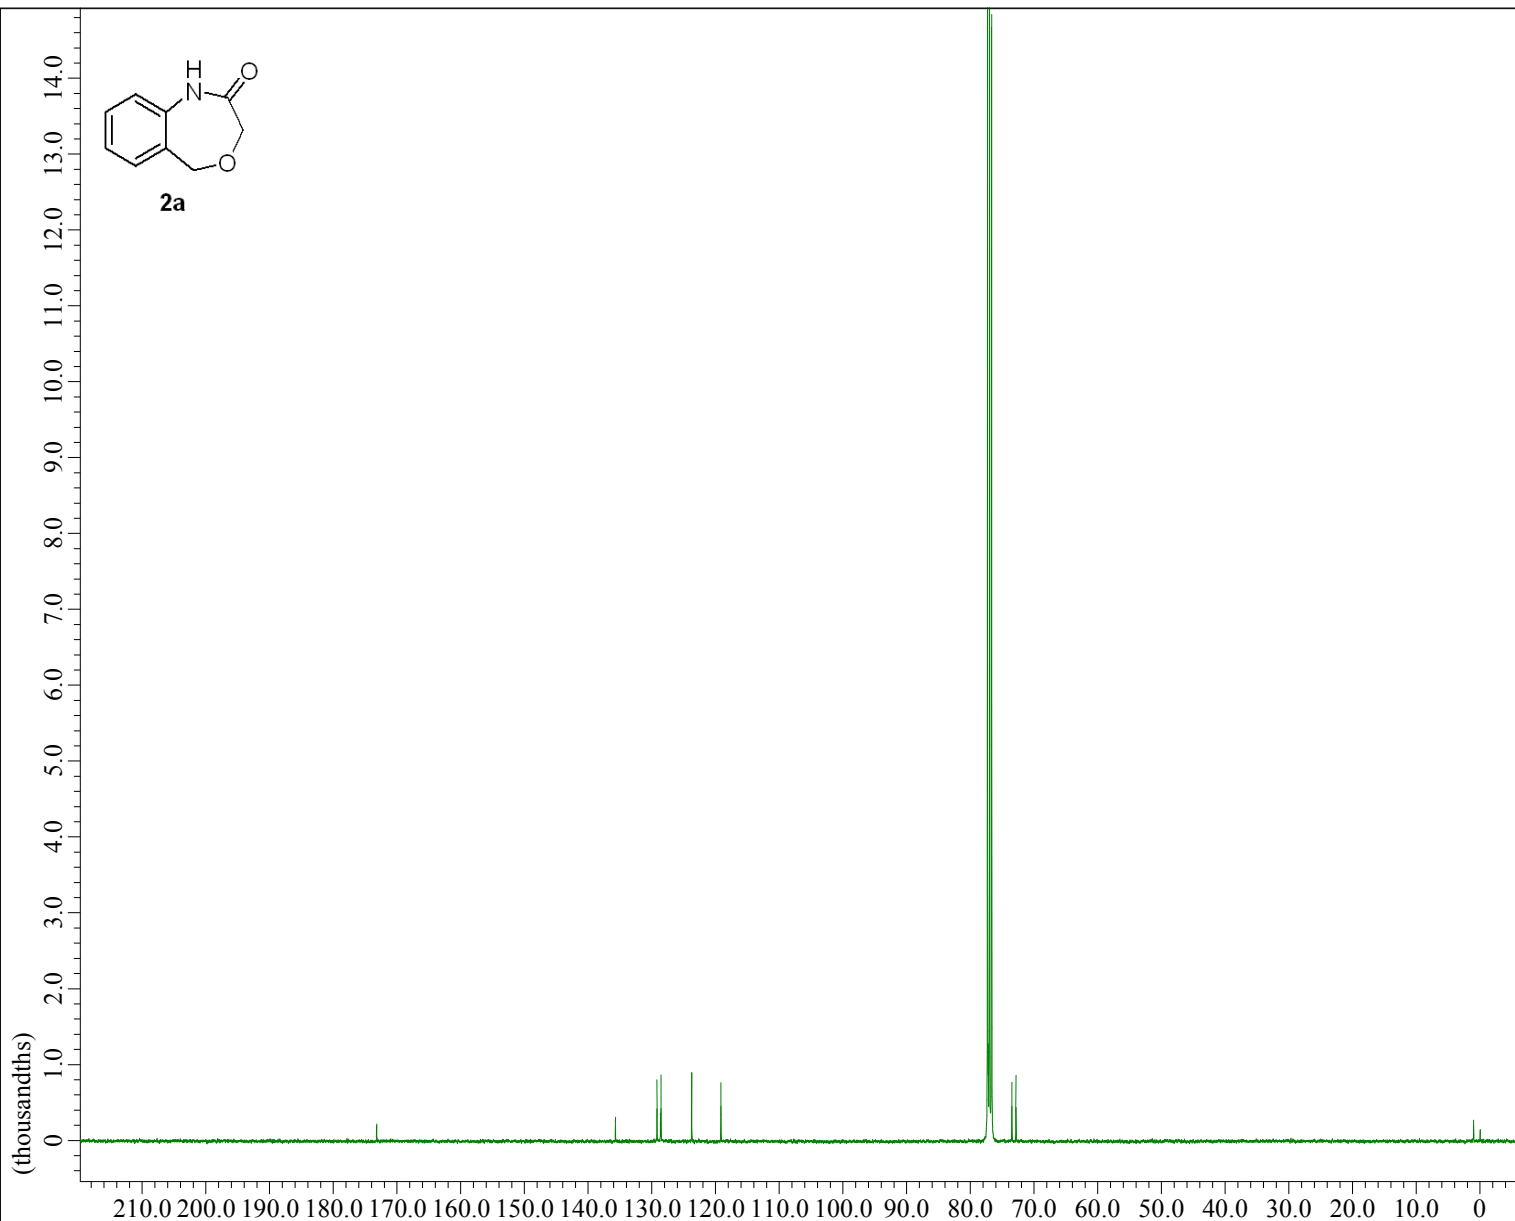

```
---- PROCESSING PARAMETERS ----
sexp( 2.0[Hz], 0.0[s] )
trapezoid( 0[%], 0[%], 80[%], 100[%] )
zerofill( 1 )
fft( 1, TRUE, TRUE )
machinephase
ppm
```

```
Filename           = LK031407_Carbon-2-
Author             = delta
Experiment         = carbon.jxp
Sample Id          = LK031407
Solvent            = CHLOROFORM-D
Actual_Start_Time  = 14-MAR-2017 23:39:
Revision_Time      = 4-AUG-2017 17:00:
```

```
Comment           = single pulse decou
Data_Format       = 1D COMPLEX
Dim_Size          = 26214
Dim_Title         = Carbon13
Dim_Units         = [ppm]
Dimensions        = X
Spectrometer      = JNM-ECZ400S/L1
```

```
Field_Strength    = 9.389766[T] (400[M
X_Acq_Duration    = 1.03809024[s]
X_Domain          = 13C
X_Freq            = 100.52530333[MHz]
X_Offset          = 100[ppm]
X_Points          = 32768
X_Prescans        = 4
X_Resolution      = 0.96330739[Hz]
X_Sweep           = 31.56565657[kHz]
X_Sweep_Clipped   = 25.25252525[kHz]
Irr_Domain        = Proton
Irr_Freq          = 399.78219838[MHz]
Irr_Offset        = 5[ppm]
Clipped           = FALSE
Scans              = 10240
Total_Scans       = 10240
```

```
Relaxation_Delay  = 2[s]
Recvr_Gain        = 50
Temp_Get          = 11.7[dC]
X_90_Width        = 8.8[us]
X_Acq_Time        = 1.03809024[s]
X_Angle           = 30[deg]
X_Atn             = 3.4[dB]
X_Pulse           = 2.93333333[us]
Irr_Atn_Dec       = 23.66[dB]
Irr_Atn_Dec_Calc  = 23.66[dB]
Irr_Atn_Dec_Default_Calc = 23.66[dB]
Irr_Atn_Noise    = 23.66[dB]
Irr_Dec_Bandwidth_Hz = 4.7826087[kHz]
Irr_Dec_Bandwidth_Ppm = 11.96303566[ppm]
Irr_Dec_Freq      = 399.78219838[MHz]
```

X : parts per Million : Carbon13

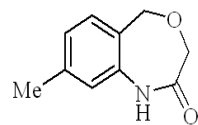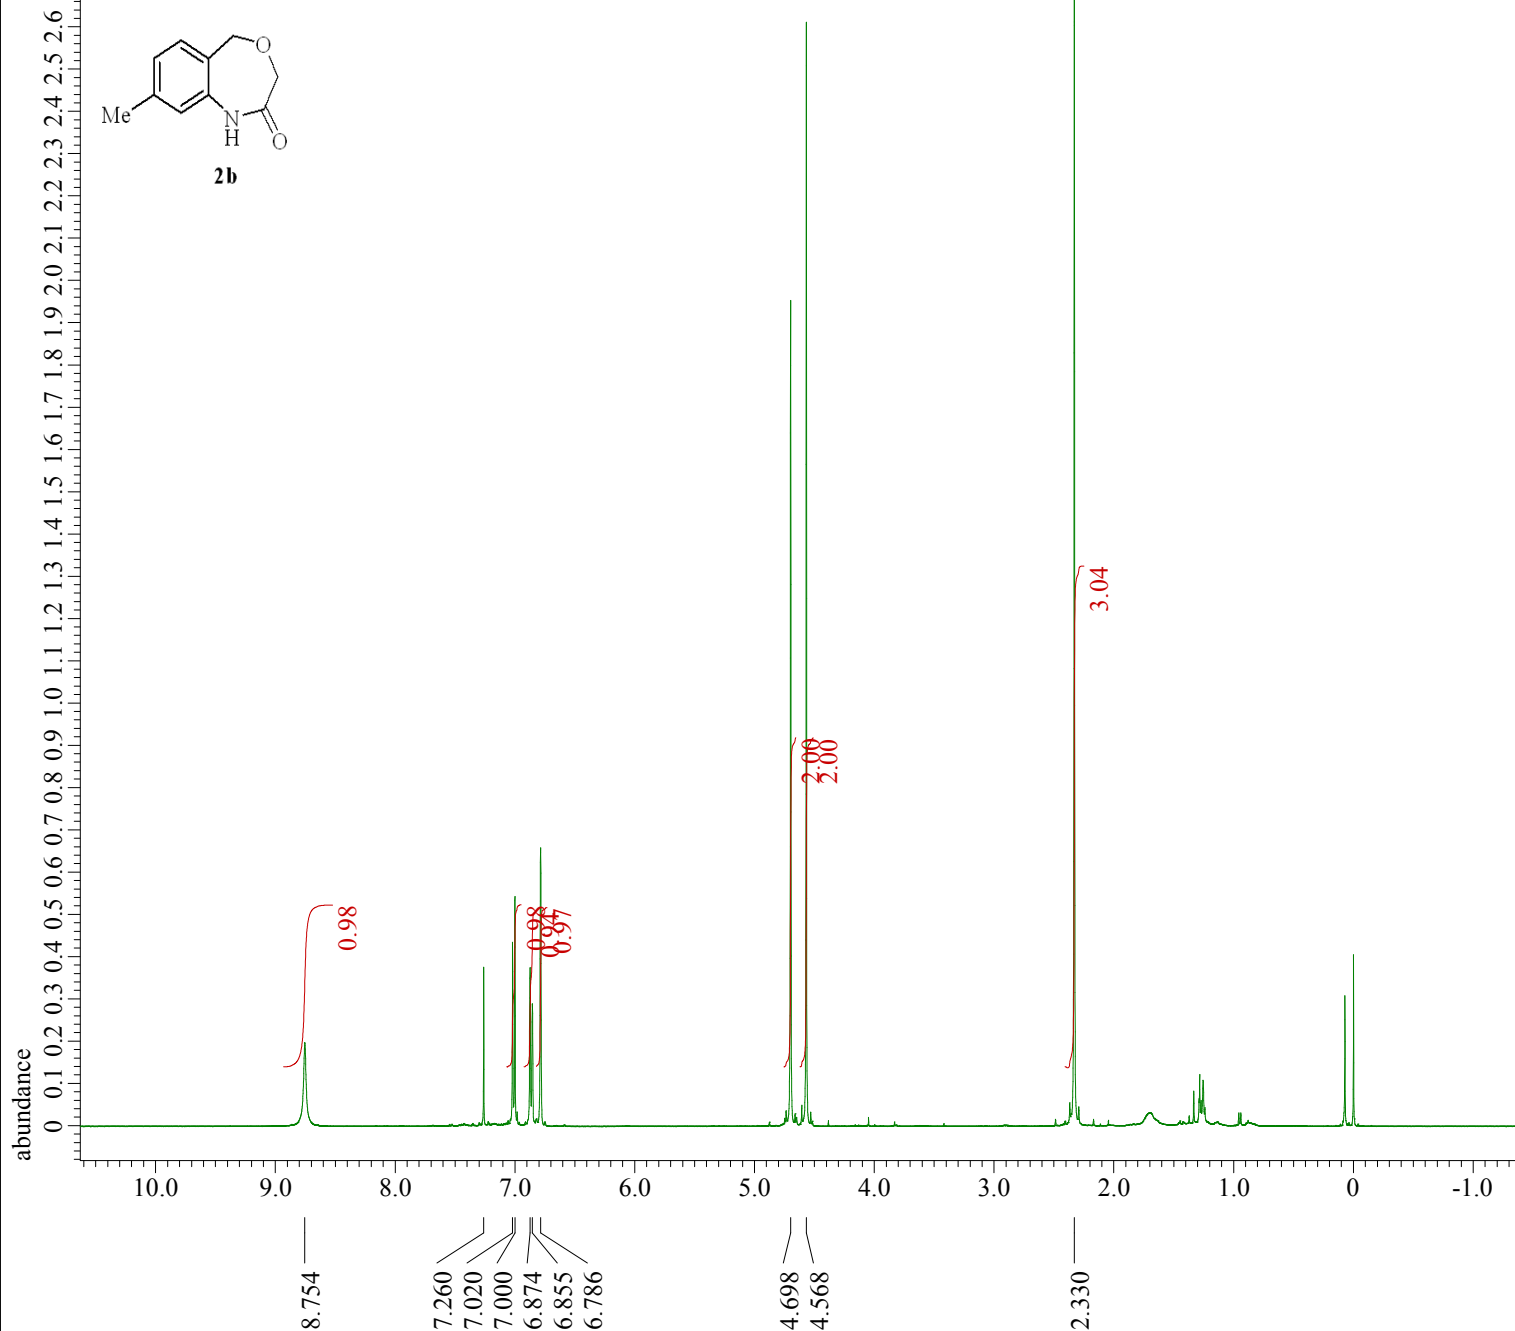

X : parts per Million : Proton

---- PROCESSING PARAMETERS ----  
sexp( 0.2[Hz], 0.0[s] )  
trapezoid( 0[%], 0[%], 80[%], 100[%] )  
zerofill( 1 )  
fft( 1, TRUE, TRUE )  
machinephase  
ppm

Derived from: LK120905\_Proton-1-1.jdf

Filename = LK120905\_Proton-1-3.j  
Author = delta  
Experiment = proton.jxp  
Sample Id = LK120905  
Solvent = CHLOROFORM-D  
Actual\_Start\_Time = 14-DEC-2016 11:57:03  
Revision\_Time = 4-AUG-2017 17:14:25

Comment = single\_pulse  
Data\_Format = 1D COMPLEX  
Dim\_Size = 13107  
Dim\_Title = Proton  
Dim\_Units = [ppm]  
Dimensions = X  
Spectrometer = JNM-ECZ400S/L1

Field\_Strength = 9.389766[T] (400[MHz])  
X\_Acq\_Duration = 2.18628096[s]  
X\_Domain = 1H  
X\_Freq = 399.78219838[MHz]  
X\_Offset = 5[ppm]  
X\_Points = 16384  
X\_Prescans = 1  
X\_Resolution = 0.45739775[Hz]  
X\_Sweep = 7.4940048[kHz]  
X\_Sweep\_Clippped = 5.99520384[kHz]  
Irr\_Domain = Proton  
Irr\_Freq = 399.78219838[MHz]  
Irr\_Offset = 5[ppm]  
Tri\_Domain = Proton  
Tri\_Freq = 399.78219838[MHz]  
Tri\_Offset = 5[ppm]  
Clipped = FALSE  
Scans = 8  
Total\_Scans = 8

Relaxation\_Delay = 5[s]  
Recvr\_Gain = 56  
Temp\_Get = 21.2[dC]  
X\_90\_Width = 9.5[us]  
X\_Acq\_Time = 2.18628096[s]  
X\_Angle = 45[deg]  
X\_Atn = 2[dB]  
X\_Pulse = 4.75[us]  
Irr\_Mode = Off  
Tri\_Mode = Off  
Dante\_Loop = 500  
Dante\_Presat = FALSE

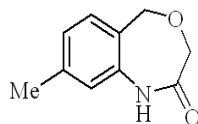

2b

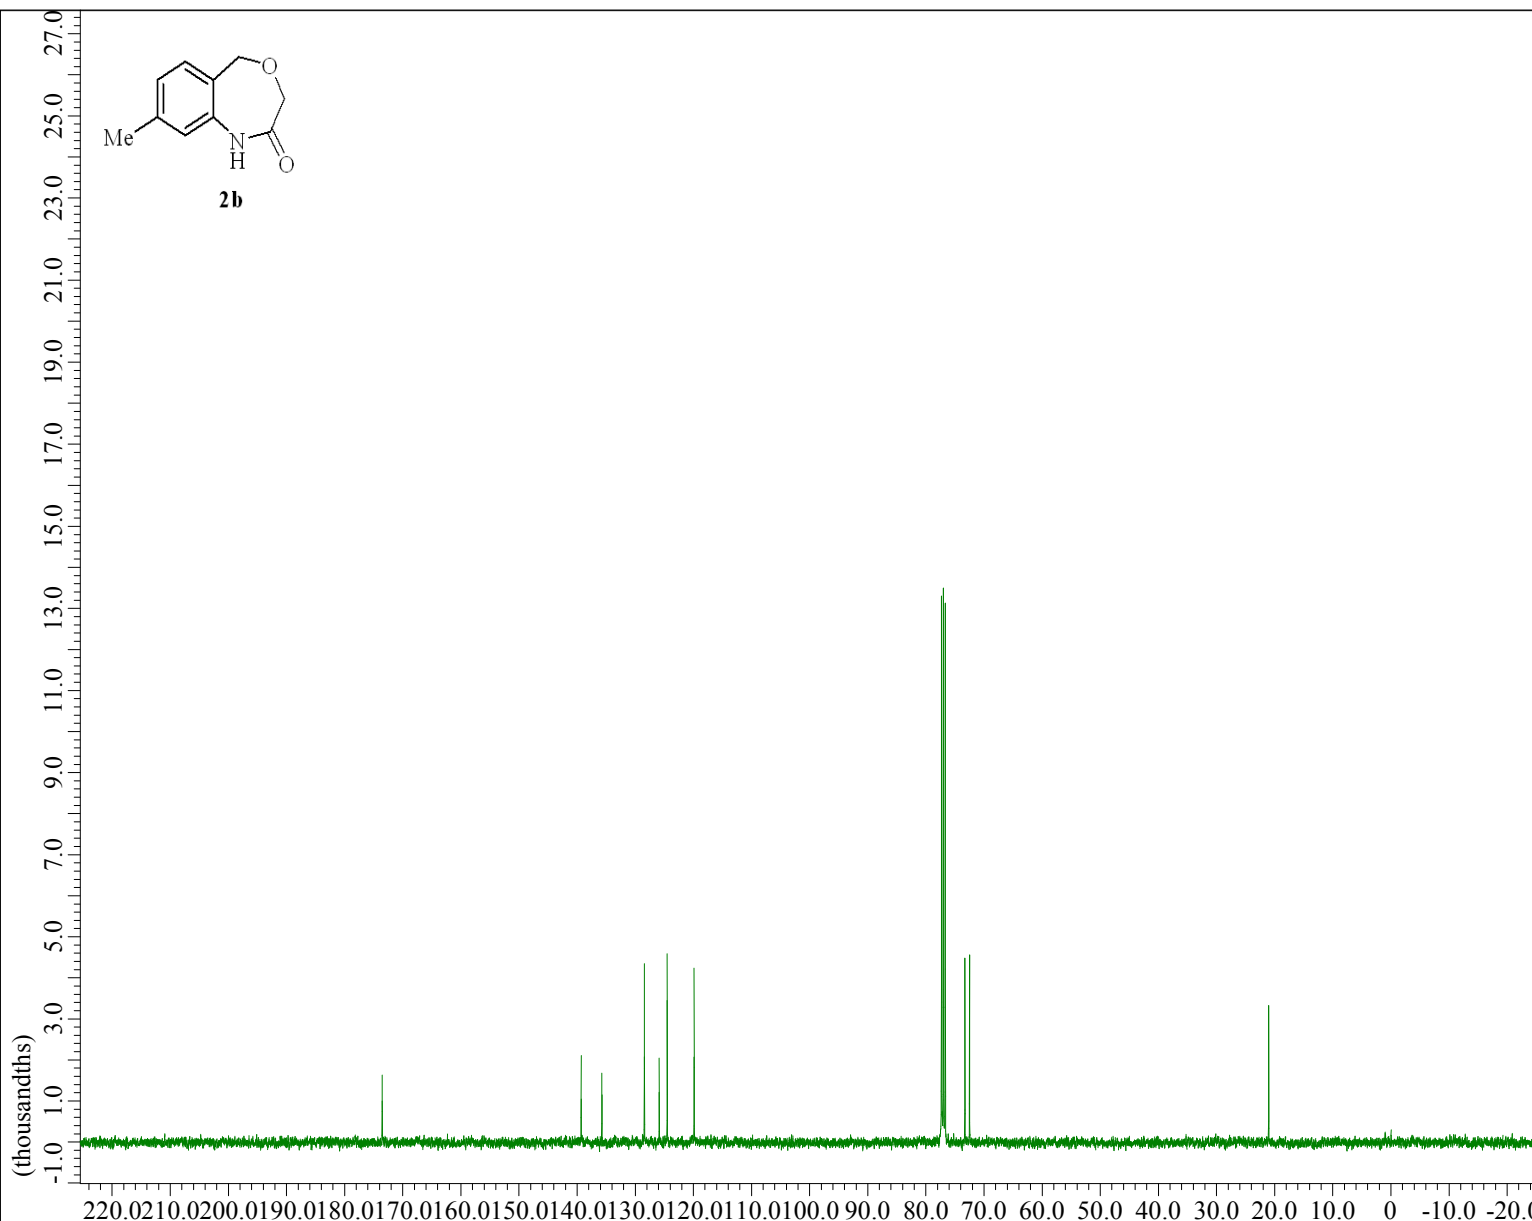

X : parts per Million : Carbon13

173.546

139.307

135.742

128.440

125.891

124.511

119.883

77.000

73.291

72.487

21.027

---- PROCESSING PARAMETERS ----  
sexp( 2.0[Hz], 0.0[s] )  
trapezoid( 0[%], 0[%], 80[%], 100[%] )  
zerofill( 1 )  
fft( 1, TRUE, TRUE )  
machinephase  
ppm

Derived from: LK120905\_Carbon-1-1.jdf

Filename = LK120905\_Carbon-1-  
Author = delta  
Experiment = carbon.jxp  
Sample Id = LK120905  
Solvent = CHLOROFORM-D  
Actual\_Start\_Time = 14-DEC-2016 14:25:  
Revision\_Time = 4-AUG-2017 17:12:

Comment = single pulse decou  
Data\_Format = 1D COMPLEX  
Dim\_Size = 26214  
Dim\_Title = Carbon13  
Dim\_Units = [ppm]  
Dimensions = X  
Spectrometer = JNM-ECZ400S/L1

Field\_Strength = 9.389766[T] (400[M  
X\_Acq\_Duration = 1.03809024[s]  
X\_Domain = 13C  
X\_Freq = 100.52530333[MHz]  
X\_Offset = 100[ppm]  
X\_Points = 32768  
X\_Prescans = 4  
X\_Resolution = 0.96330739[Hz]  
X\_Sweep = 31.56565657[kHz]  
X\_Sweep\_Clippped = 25.25252525[kHz]  
Irr\_Domain = Proton  
Irr\_Freq = 399.78219838[MHz]  
Irr\_Offset = 5[ppm]  
Clipped = FALSE  
Scans = 240  
Total\_Scans = 240

Relaxation\_Delay = 2[s]  
Recvr Gain = 50  
Temp\_Get = 21.7[dC]  
X\_90\_Width = 8.8[us]  
X\_Acq\_Time = 1.03809024[s]  
X\_Angle = 30[deg]  
X\_Atn = 3.4[dB]  
X\_Pulse = 2.93333333[us]  
Irr\_Atn\_Dec = 23.66[dB]  
Irr\_Atn\_Dec\_Calc = 23.66[dB]  
Irr\_Atn\_Dec\_Default\_Calc = 23.66[dB]  
Irr\_Atn\_NoE = 23.66[dB]  
Irr\_Dec\_Bandwidth\_Hz = 4.7826087[kHz]  
Irr\_Dec\_Bandwidth\_Ppm = 11.96303566[ppm]  
Irr\_Dec\_Freq = 399.78219838[MHz]

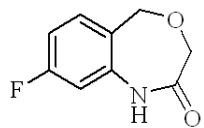

2c

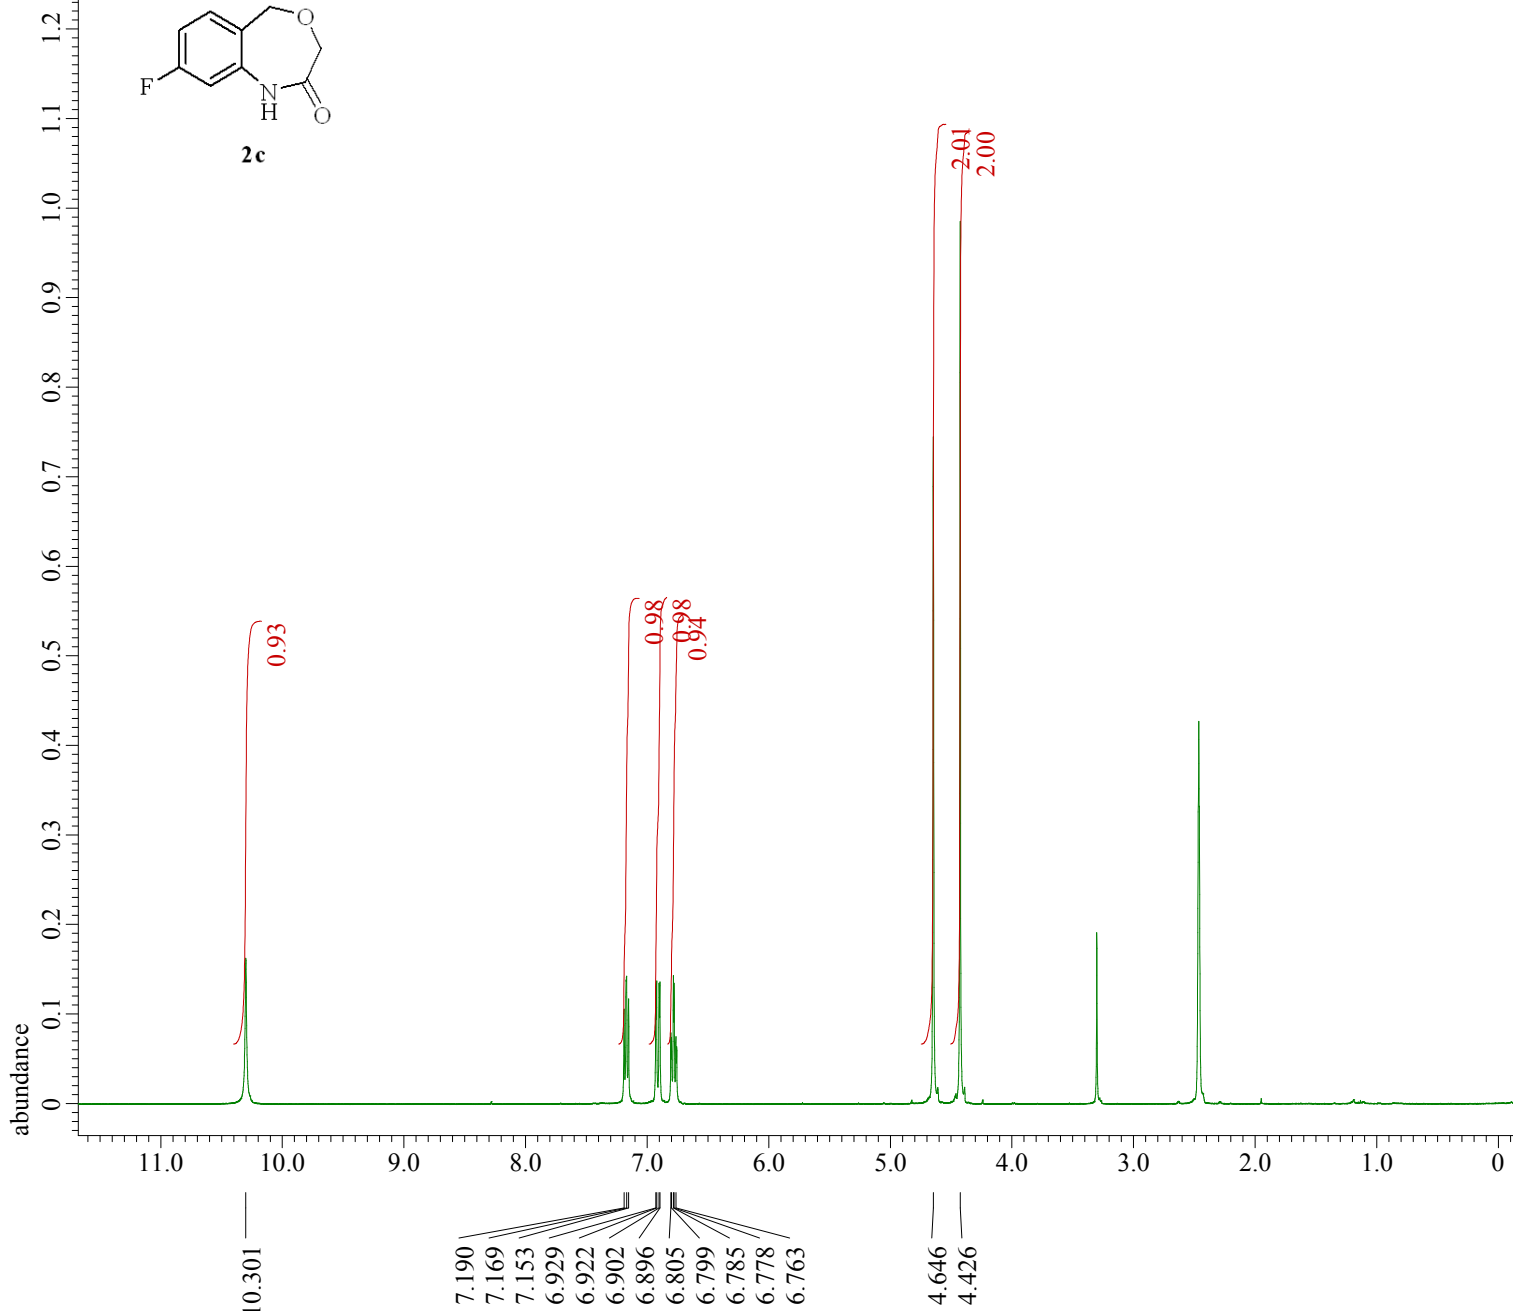

X : parts per Million : Proton

---- PROCESSING PARAMETERS ----  
sexp( 0.2[Hz], 0.0[s] )  
trapezoid( 0[%], 0[%], 80[%], 100[%] )  
zerofill( 1 )  
fft( 1, TRUE, TRUE )  
machinephase  
ppm

Derived from: LK1206-3\_Proton-1-1.jdf

Filename = LK1206-3\_Proton-1-3.j  
Author = delta  
Experiment = proton.jxp  
Sample Id = LK1206-3  
Solvent = DMSO-D6  
Actual\_Start\_Time = 6-DEC-2016 11:33:51  
Revision\_Time = 4-AUG-2017 17:21:11

Comment = single\_pulse  
Data\_Format = 1D\_COMPLEX  
Dim\_Size = 13107  
Dim\_Title = Proton  
Dim\_Units = [ppm]  
Dimensions = X  
Spectrometer = JNM-ECZ400S/L1

Field\_Strength = 9.389766[T] (400[MHz])  
X\_Acq\_Duration = 2.18628096[s]  
X\_Domain = 1H  
X\_Freq = 399.78219838[MHz]  
X\_Offset = 5[ppm]  
X\_Points = 16384  
X\_Prescans = 1  
X\_Resolution = 0.45739775[Hz]  
X\_Sweep = 7.4940048[kHz]  
X\_Sweep\_Clippped = 5.99520384[kHz]  
Irr\_Domain = Proton  
Irr\_Freq = 399.78219838[MHz]  
Irr\_Offset = 5[ppm]  
Tri\_Domain = Proton  
Tri\_Freq = 399.78219838[MHz]  
Tri\_Offset = 5[ppm]  
Clipped = FALSE  
Scans = 8  
Total\_Scans = 8

Relaxation\_Delay = 5[s]  
Recvr\_Gain = 56  
Temp\_Get = 18.8[dC]  
X\_90\_Width = 9.5[us]  
X\_Acq\_Time = 2.18628096[s]  
X\_Angle = 45[deg]  
X\_Atn = 2[dB]  
X\_Pulse = 4.75[us]  
Irr\_Mode = Off  
Tri\_Mode = Off  
Dante\_Loop = 500  
Dante\_Presat = FALSE

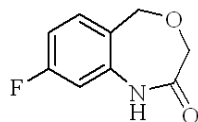

2c

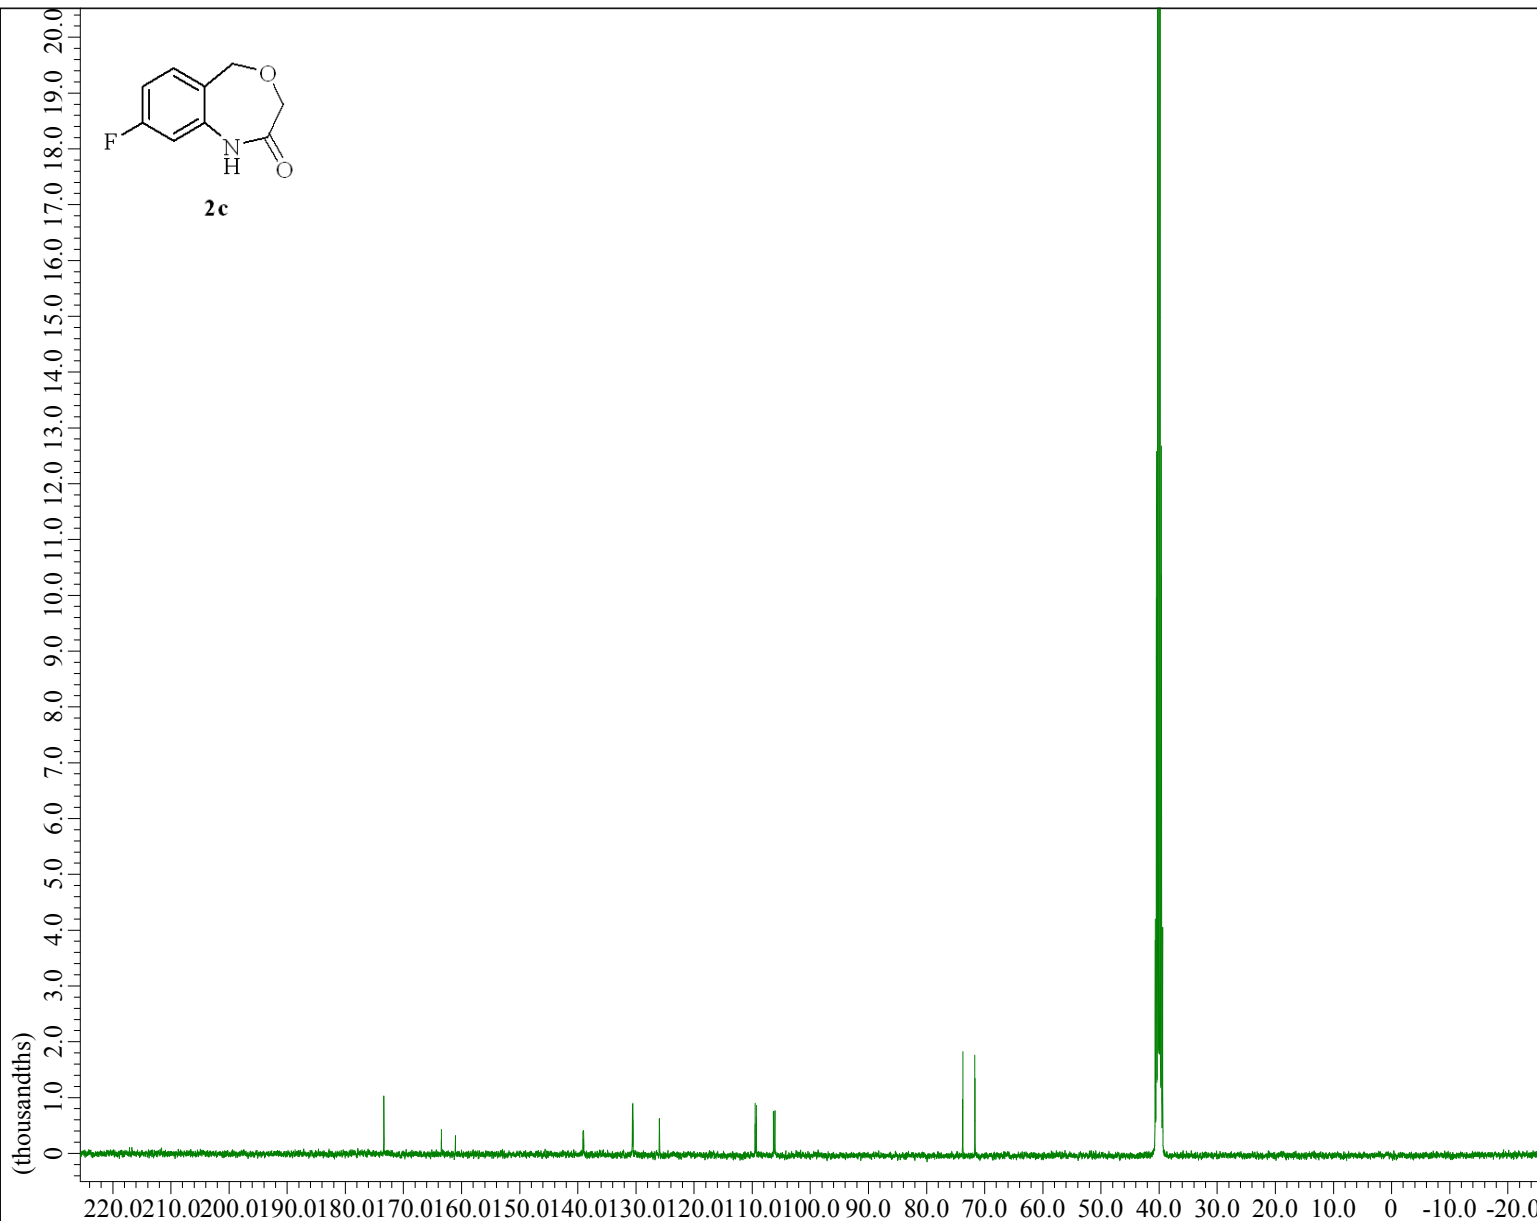

X : parts per Million : Carbon13

- 173.365
- 163.466
- 161.052
- 139.107
- 139.002
- 130.617
- 130.521
- 125.988
- 125.960
- 109.506
- 109.295
- 106.353
- 106.095
- 73.772
- 71.693

---- PROCESSING PARAMETERS ----  
sexp( 2.0[Hz], 0.0[s] )  
trapezoid( 0[%], 0[%], 80[%], 100[%] )  
zerofill( 1 )  
fft( 1, TRUE, TRUE )  
machinephase  
ppm

Derived from: LK1206-3\_Carbon-1-1.jdf

Filename = LK1206-3\_Carbon-1-  
Author = delta  
Experiment = carbon.jxp  
Sample Id = LK1206-3  
Solvent = DMSO-D6  
Actual\_Start\_Time = 6-DEC-2016 12:41:  
Revision\_Time = 4-AUG-2017 17:56:

Comment = single pulse decou  
Data\_Format = 1D COMPLEX  
Dim\_Size = 26214  
Dim\_Title = Carbon13  
Dim\_Units = [ppm]  
Dimensions = X  
Spectrometer = JNM-ECZ400S/L1

Field\_Strength = 9.389766[T] (400[M  
X\_Acq\_Duration = 1.03809024[s]  
X\_Domain = 13C  
X\_Freq = 100.52530333[MHz]  
X\_Offset = 100[ppm]  
X\_Points = 32768  
X\_Prescans = 4  
X\_Resolution = 0.96330739[Hz]  
X\_Sweep = 31.56565657[kHz]  
X\_Sweep\_Clippped = 25.25252525[kHz]  
Irr\_Domain = Proton  
Irr\_Freq = 399.78219838[MHz]  
Irr\_Offset = 5[ppm]  
Clipped = FALSE  
Scans = 1024  
Total\_Scans = 1024

Relaxation\_Delay = 2[s]  
Recvr Gain = 50  
Temp\_Get = 19.2[dC]  
X\_90\_Width = 8.8[us]  
X\_Acq\_Time = 1.03809024[s]  
X\_Angle = 30[deg]  
X\_Atn = 3.4[dB]  
X\_Pulse = 2.93333333[us]  
Irr\_Atn\_Dec = 23.66[dB]  
Irr\_Atn\_Dec\_Calc = 23.66[dB]  
Irr\_Atn\_Dec\_Default\_Calc = 23.66[dB]  
Irr\_Atn\_Noec = 23.66[dB]  
Irr\_Dec\_Bandwidth\_Hz = 4.7826087[kHz]  
Irr\_Dec\_Bandwidth\_Ppm = 11.96303566[ppm]  
Irr\_Dec\_Freq = 399.78219838[MHz]



---- PROCESSING PARAMETERS ----

```
sxpc( 0.2[Hz], 0.0[s] )
trapezoid( 0[%], 0[%], 80[%], 100[%] )
zerofill( 1 )
fft( 1, TRUE, TRUE )
machinephase
ppm
```

Derived from: LK1206-3\_single\_pulse-1-1.jdf

```
Filename      = LK1206-3_single_pulse
Author        = delta
Experiment    = single_pulse.jxp
Sample Id     = LK1206-3
Solvent       = DMSO-D6
Actual_Start_Time = 6-DEC-2016 11:35:47
Revision_Time  = 4-AUG-2017 17:47:44
```

```
Comment       = single_pulse
Data_Format   = 1D COMPLEX
Dim Size      = 13107
Dim Title     = Fluorine19
Dim Units     = [ppm]
Dimensions    = X
Spectrometer  = JNM-ECZ400S/L1
```

```
Field_Strength = 9.389766[T] (400[MHz])
X_Acq_Duration = 83.88608[ms]
X_Domain       = 19F
X_Freq         = 376.17105393[MHz]
X_Offset       = -100[ppm]
X_Points       = 16384
X_Prescans     = 1
X_Resolution   = 11.92092896[Hz]
X_Sweep        = 195.3125[kHz]
X_Sweep_Clippped = 156.25[kHz]
Irr_Domain     = Fluorine19
Irr_Freq       = 376.17105393[MHz]
Irr_Offset     = 5[ppm]
Tri_Domain     = Fluorine19
Tri_Freq       = 376.17105393[MHz]
Tri_Offset     = 5[ppm]
Clipped        = FALSE
Scans          = 8
Total_Scans    = 8
```

```
Relaxation_Delay = 5[s]
Recvr_Gain       = 50
Temp_Get         = 18.8[dC]
X_90_Width       = 10[us]
X_Acq_Time       = 83.88608[ms]
X_Angle          = 45[deg]
X_Atn            = 0.9[dB]
X_Pulse          = 5[us]
Irr_Mode         = Off
Tri_Mode         = Off
Dante_Loop       = 500
Dante_Presat     = FALSE
```

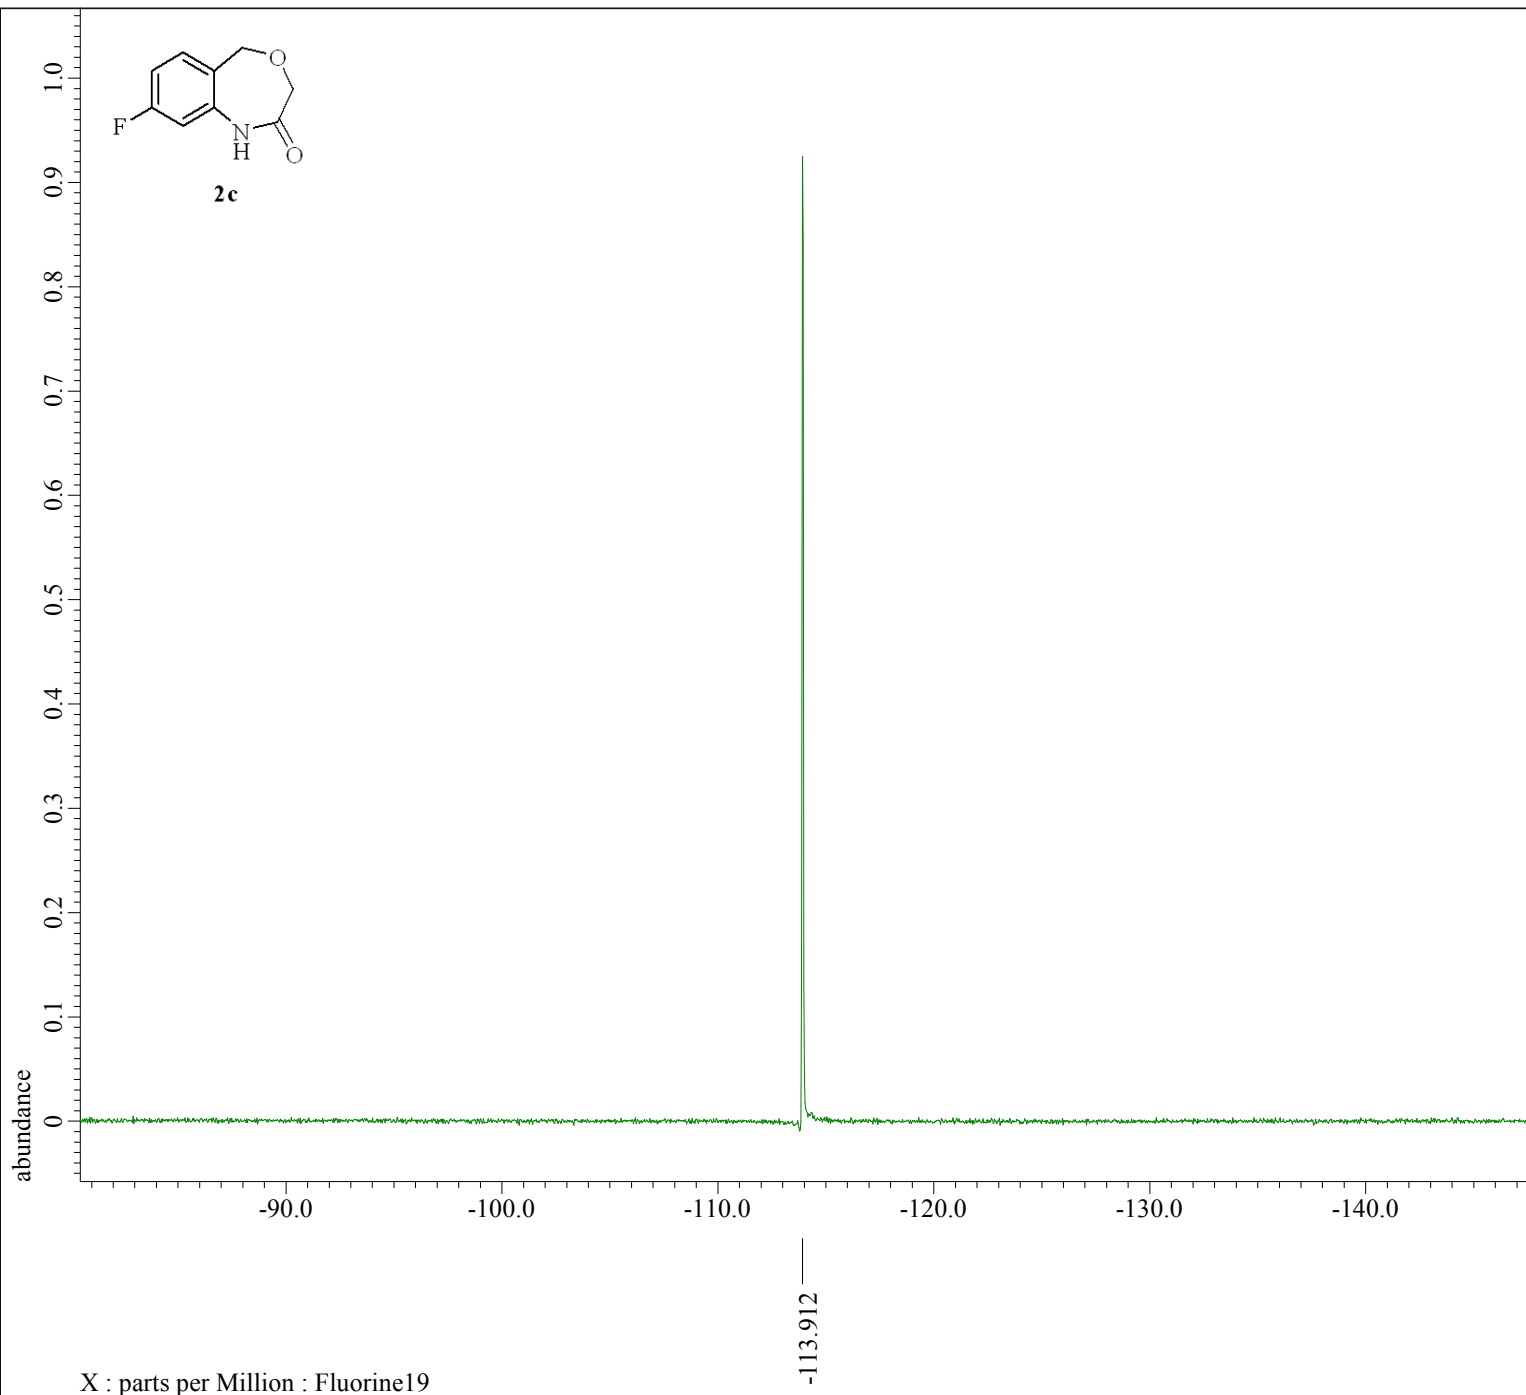

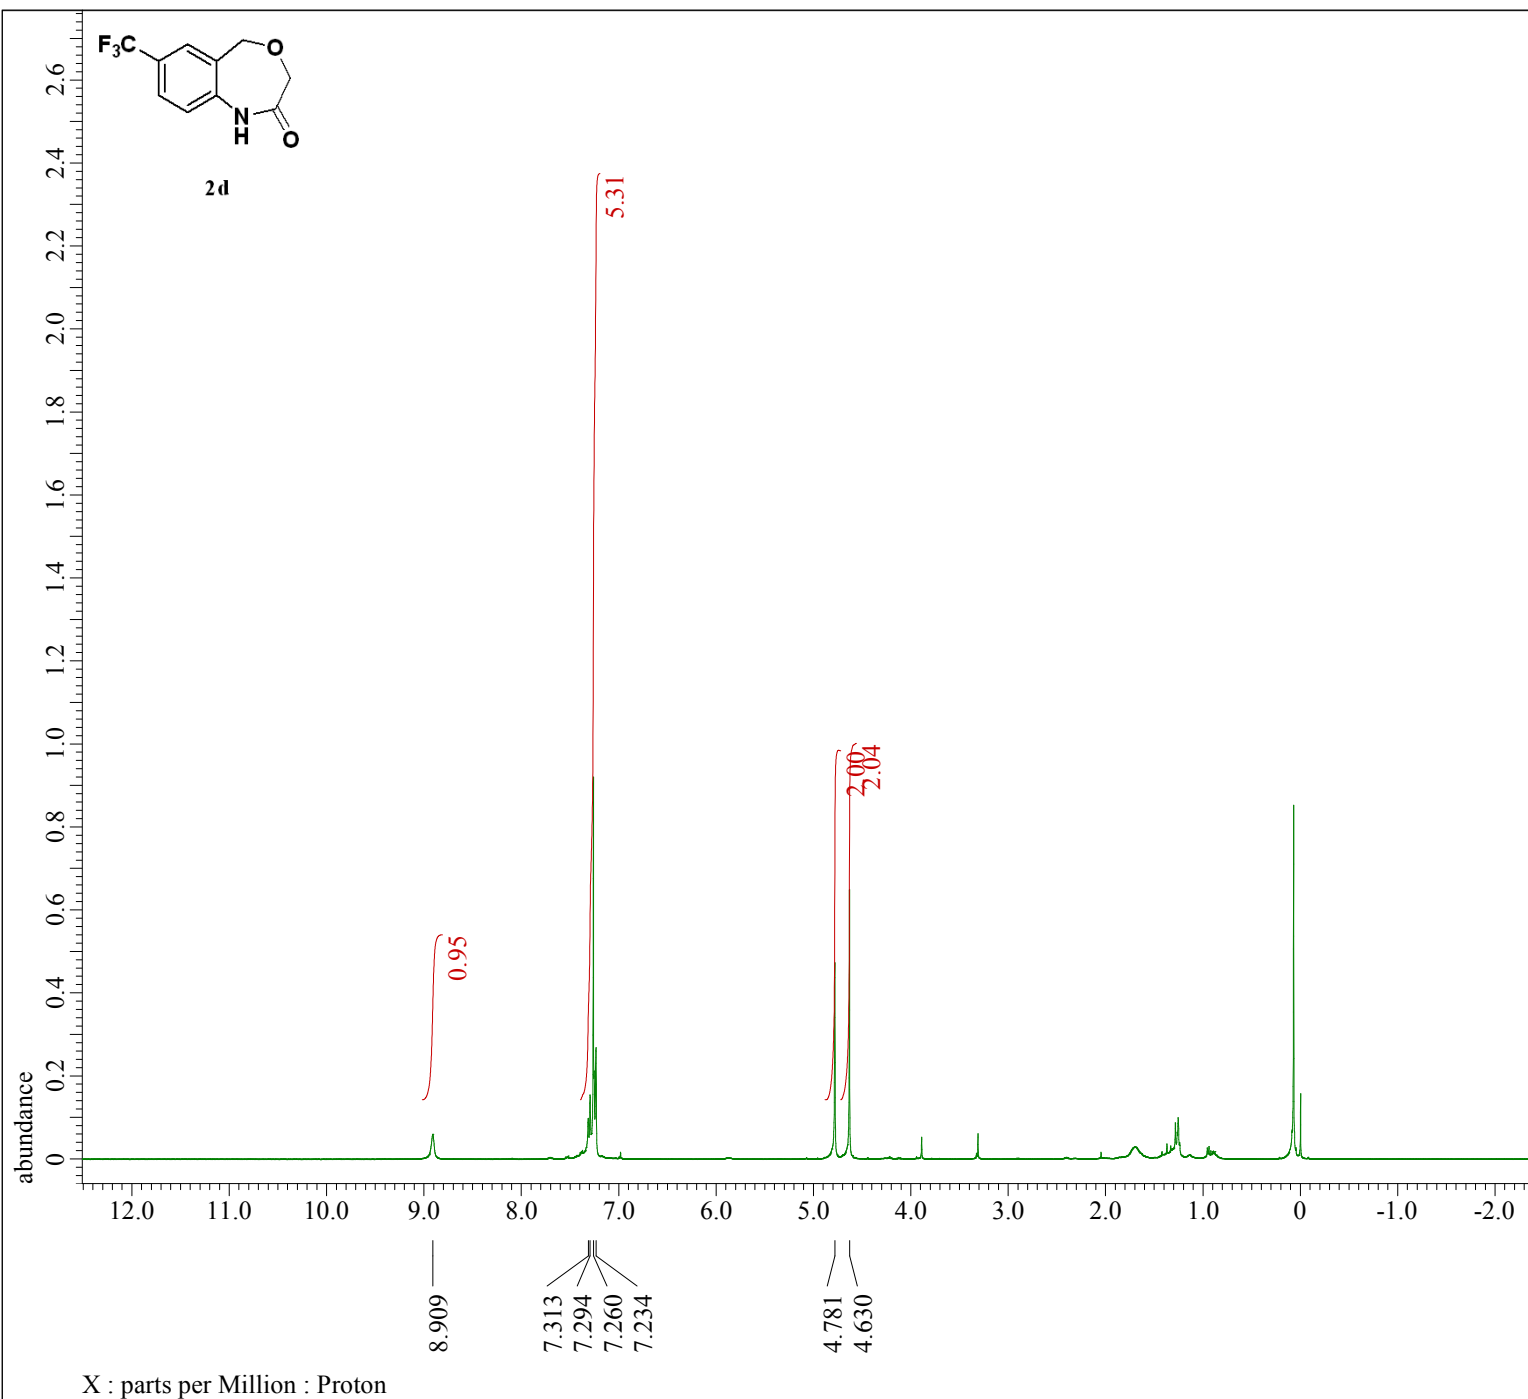

---- PROCESSING PARAMETERS ----  
sexp( 0.2[Hz], 0.0[s] )  
trapezoid( 0[%], 0[%], 80[%], 100[%] )  
zerofill( 1 )  
fft( 1, TRUE, TRUE )  
machinephase  
ppm

Derived from: LK0420-01\_Proton-1-1.jdf

Filename = LK0420-01\_Proton-1-3.  
Author = delta  
Experiment = proton.jxp  
Sample Id = LK0420-01  
Solvent = CHLOROFORM-D  
Actual\_Start\_Time = 20-APR-2017 15:00:45  
Revision\_Time = 4-AUG-2017 18:36:12

Comment = single\_pulse  
Data\_Format = 1D COMPLEX  
Dim\_Size = 13107  
Dim\_Title = Proton  
Dim\_Units = [ppm]  
Dimensions = X  
Spectrometer = JNM-ECZ400S/L1

Field\_Strength = 9.389766[T] (400[MHz])  
X\_Acq\_Duration = 2.18628096[s]  
X\_Domain = 1H  
X\_Freq = 399.78219838[MHz]  
X\_Offset = 5[ppm]  
X\_Points = 16384  
X\_Prescans = 1  
X\_Resolution = 0.45739775[Hz]  
X\_Sweep = 7.4940048[kHz]  
X\_Sweep\_Clippped = 5.99520384[kHz]  
Irr\_Domain = Proton  
Irr\_Freq = 399.78219838[MHz]  
Irr\_Offset = 5[ppm]  
Tri\_Domain = Proton  
Tri\_Freq = 399.78219838[MHz]  
Tri\_Offset = 5[ppm]  
Clipped = FALSE  
Scans = 8  
Total\_Scans = 8

Relaxation\_Delay = 5[s]  
Recvr\_Gain = 56  
Temp\_Get = 20.6[dC]  
X\_90\_Width = 9.5[us]  
X\_Acq\_Time = 2.18628096[s]  
X\_Angle = 45[deg]  
X\_Atn = 2[dB]  
X\_Pulse = 4.75[us]  
Irr\_Mode = Off  
Tri\_Mode = Off  
Dante\_Loop = 500  
Dante\_Presat = FALSE



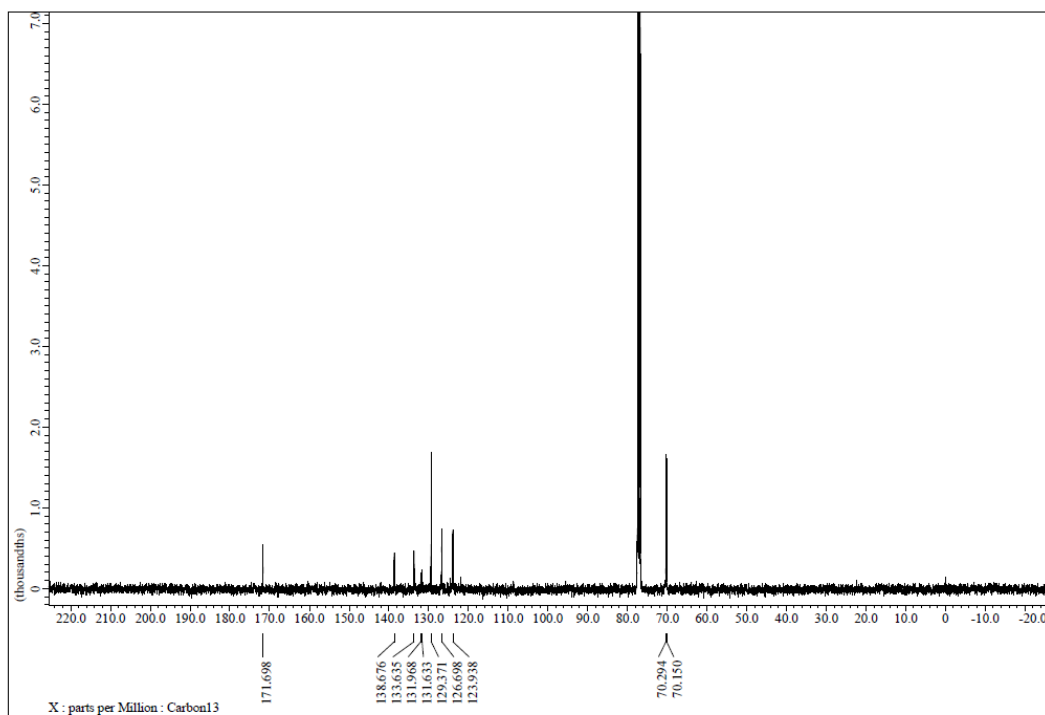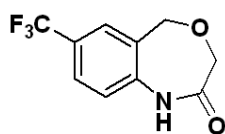

2d



---- PROCESSING PARAMETERS ----

```
sxpc( 0.2[Hz], 0.0[s] )
trapezoid( 0[%], 0[%], 80[%], 100[%] )
zerofill( 1 )
fft( 1, TRUE, TRUE )
machinephase
ppm
```

Derived from: LK0420-01\_single\_pulse-1-1.jdf

```
Filename      = LK0420-01_single_puls
Author        = delta
Experiment    = single_pulse.jxp
Sample Id     = LK0420-01
Solvent       = CHLOROFORM-D
Actual_Start_Time = 21-APR-2017 14:01:02
Revision_Time  = 4-AUG-2017 18:43:58
```

```
Comment       = single_pulse
Data_Format   = 1D COMPLEX
Dim Size      = 13107
Dim Title     = Fluorine19
Dim Units     = [ppm]
Dimensions    = X
Spectrometer  = JNM-ECZ400S/L1
```

```
Field_Strength = 9.389766[T] (400[MHz])
X_Acq_Duration = 83.88608[ms]
X_Domain       = 19F
X_Freq         = 376.17105393[MHz]
X_Offset       = -100[ppm]
X_Points       = 16384
X_Prescans     = 1
X_Resolution   = 11.92092896[Hz]
X_Sweep        = 195.3125[kHz]
X_Sweep_Clippped = 156.25[kHz]
Irr_Domain     = Fluorine19
Irr_Freq       = 376.17105393[MHz]
Irr_Offset     = 5[ppm]
Tri_Domain     = Fluorine19
Tri_Freq       = 376.17105393[MHz]
Tri_Offset     = 5[ppm]
Clipped        = FALSE
Scans          = 8
Total_Scans    = 8
```

```
Relaxation_Delay = 5[s]
Recvr_Gain        = 50
Temp_Get          = 20.1[dC]
X_90_Width       = 10[us]
X_Acq_Time       = 83.88608[ms]
X_Angle          = 45[deg]
X_Atn            = 0.9[dB]
X_Pulse          = 5[us]
Irr_Mode         = Off
Tri_Mode         = Off
Dante_Loop       = 500
Dante_Presat     = FALSE
```

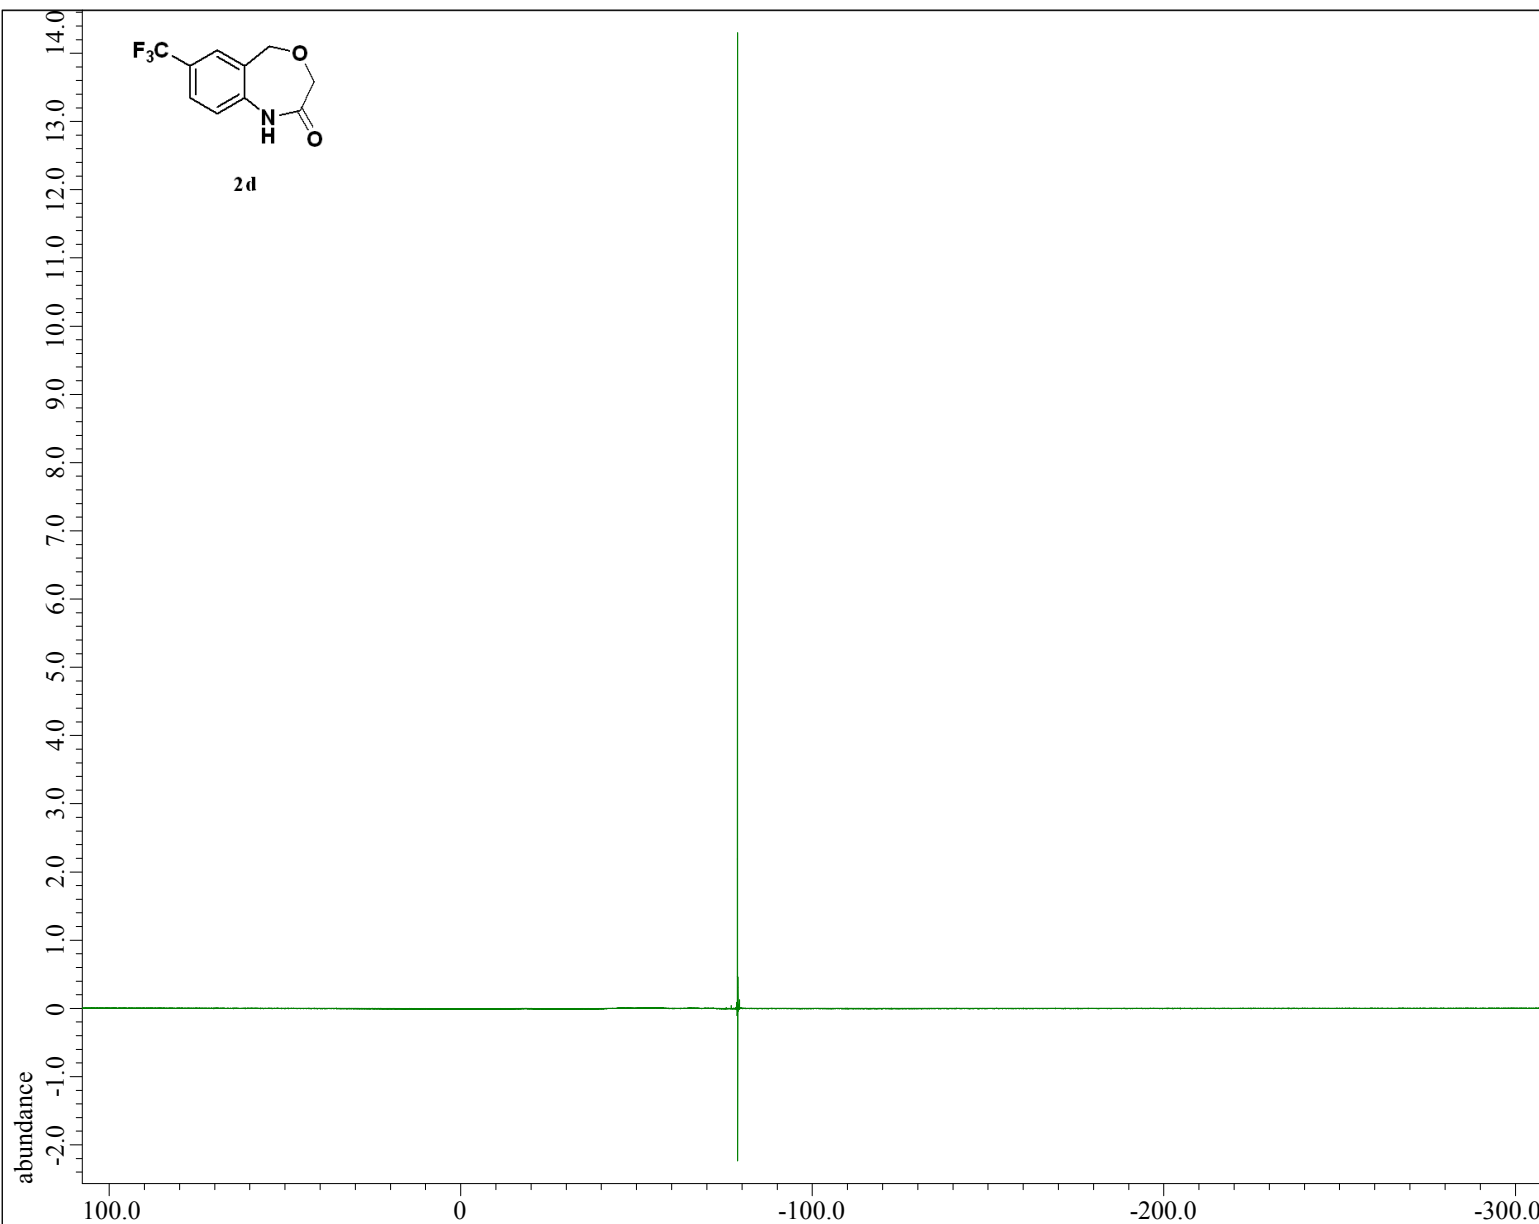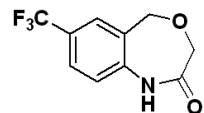

2d

X : parts per Million : Fluorine19

-78.831

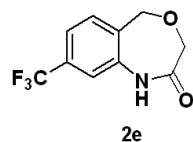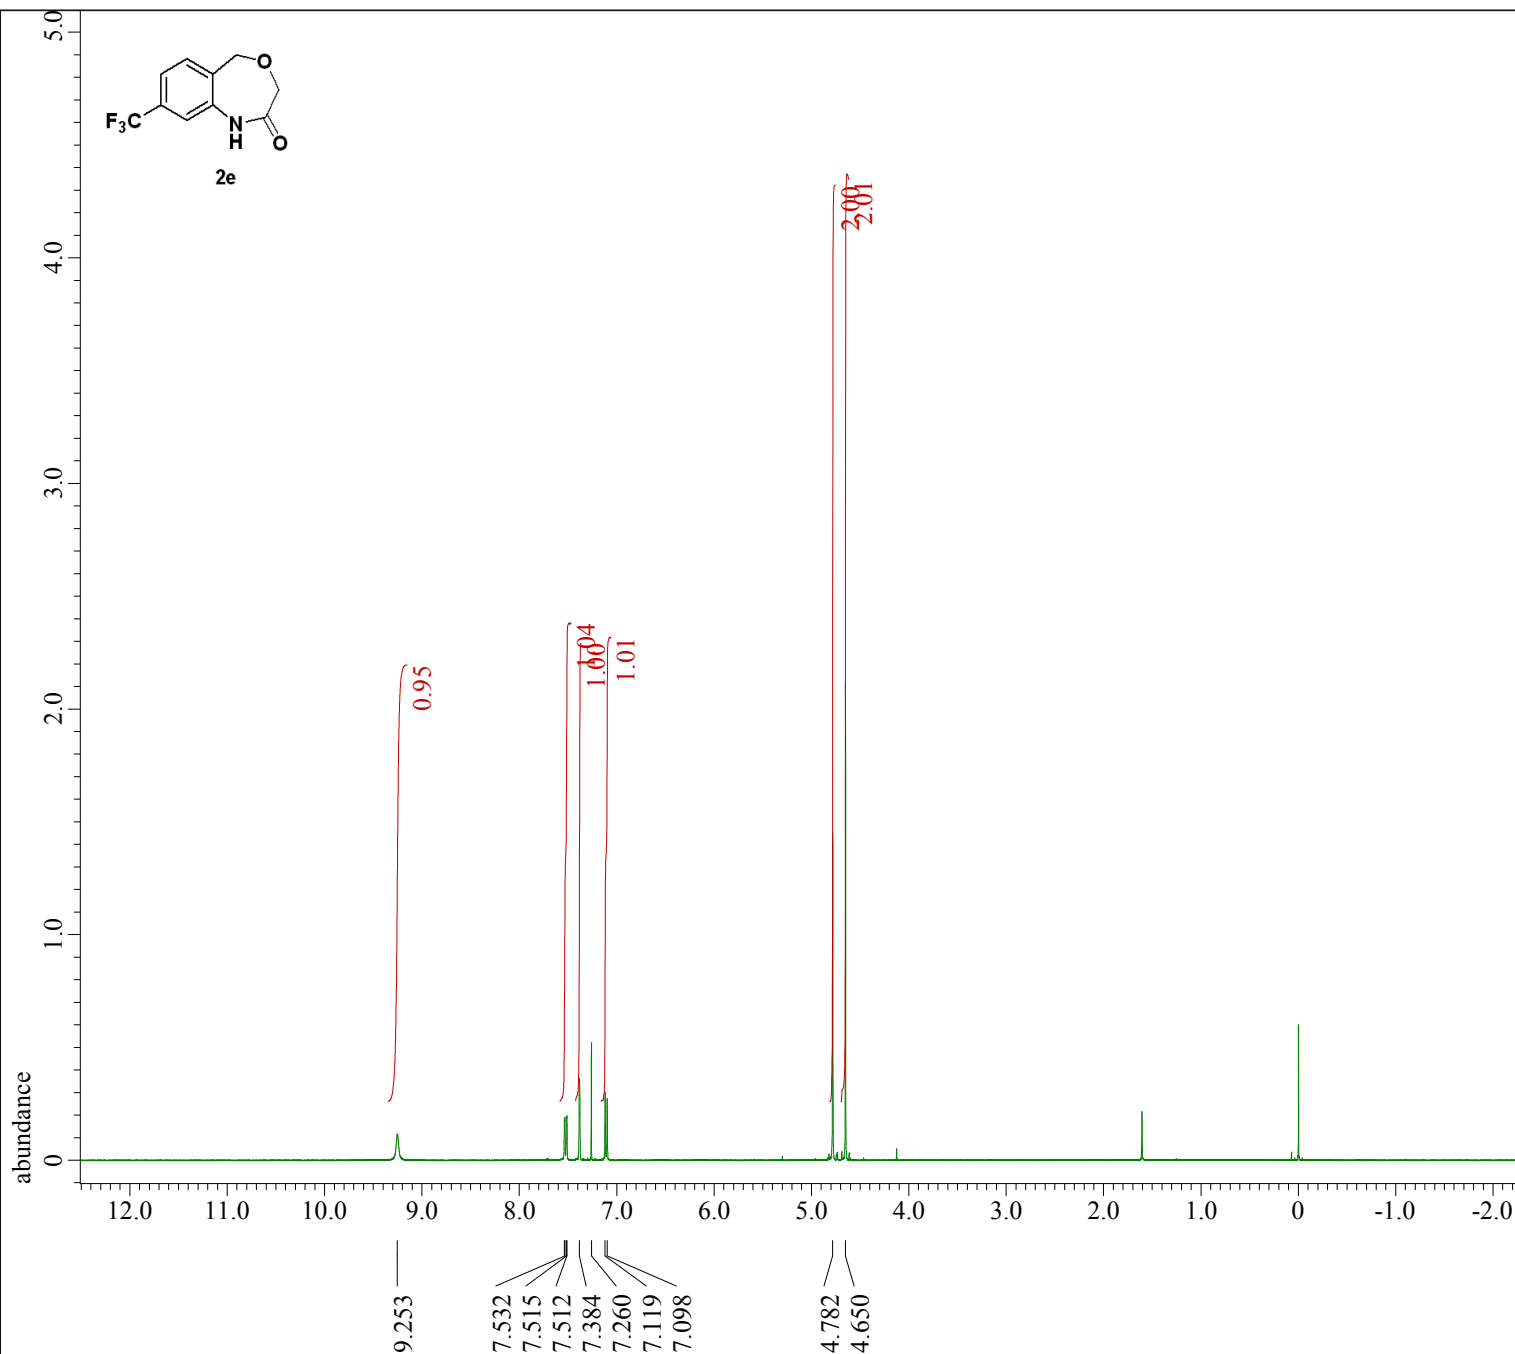

X : parts per Million : Proton

```
---- PROCESSING PARAMETERS ----
sexp( 0.2[Hz], 0.0[s] )
trapezoid( 0[%], 0[%], 80[%], 100[%] )
zerofill( 1 )
fft( 1, TRUE, TRUE )
machinephase
ppm
```

```
Filename      = LK121402_Proton-1-4.j
Author       = delta
Experiment   = proton.jxp
Sample Id    = LK121402
Solvent      = CHLOROFORM-D
Actual_Start_Time = 14-DEC-2016 12:05:31
Revision_Time   = 4-AUG-2017 18:48:52
```

```
Comment      = single_pulse
Data_Format  = 1D COMPLEX
Dim_Size     = 13107
Dim_Title    = Proton
Dim_Units    = [ppm]
Dimensions   = X
Spectrometer = JNM-ECZ400S/L1
```

```
Field_Strength = 9.389766[T] (400[MHz])
X_Acq_Duration = 2.18628096[s]
X_Domain       = 1H
X_Freq         = 399.78219838[MHz]
X_Offset       = 5[ppm]
X_Points       = 16384
X_Prescans     = 1
X_Resolution  = 0.45739775[Hz]
X_Sweep        = 7.4940048[kHz]
X_Sweep_Clippped = 5.99520384[kHz]
Irr_Domain     = Proton
Irr_Freq       = 399.78219838[MHz]
Irr_Offset     = 5[ppm]
Tri_Domain     = Proton
Tri_Freq       = 399.78219838[MHz]
Tri_Offset     = 5[ppm]
Clipped       = FALSE
Scans         = 8
Total_Scans    = 8
```

```
Relaxation_Delay = 5[s]
Recvr_Gain       = 56
Temp_Get         = 21.1[dC]
X_90_Width       = 9.5[us]
X_Acq_Time       = 2.18628096[s]
X_Angle          = 45[deg]
X_Atn            = 2[dB]
X_Pulse          = 4.75[us]
Irr_Mode         = Off
Tri_Mode         = Off
Dante_Loop       = 500
Dante_Presat     = FALSE
```

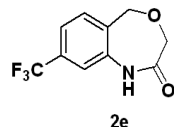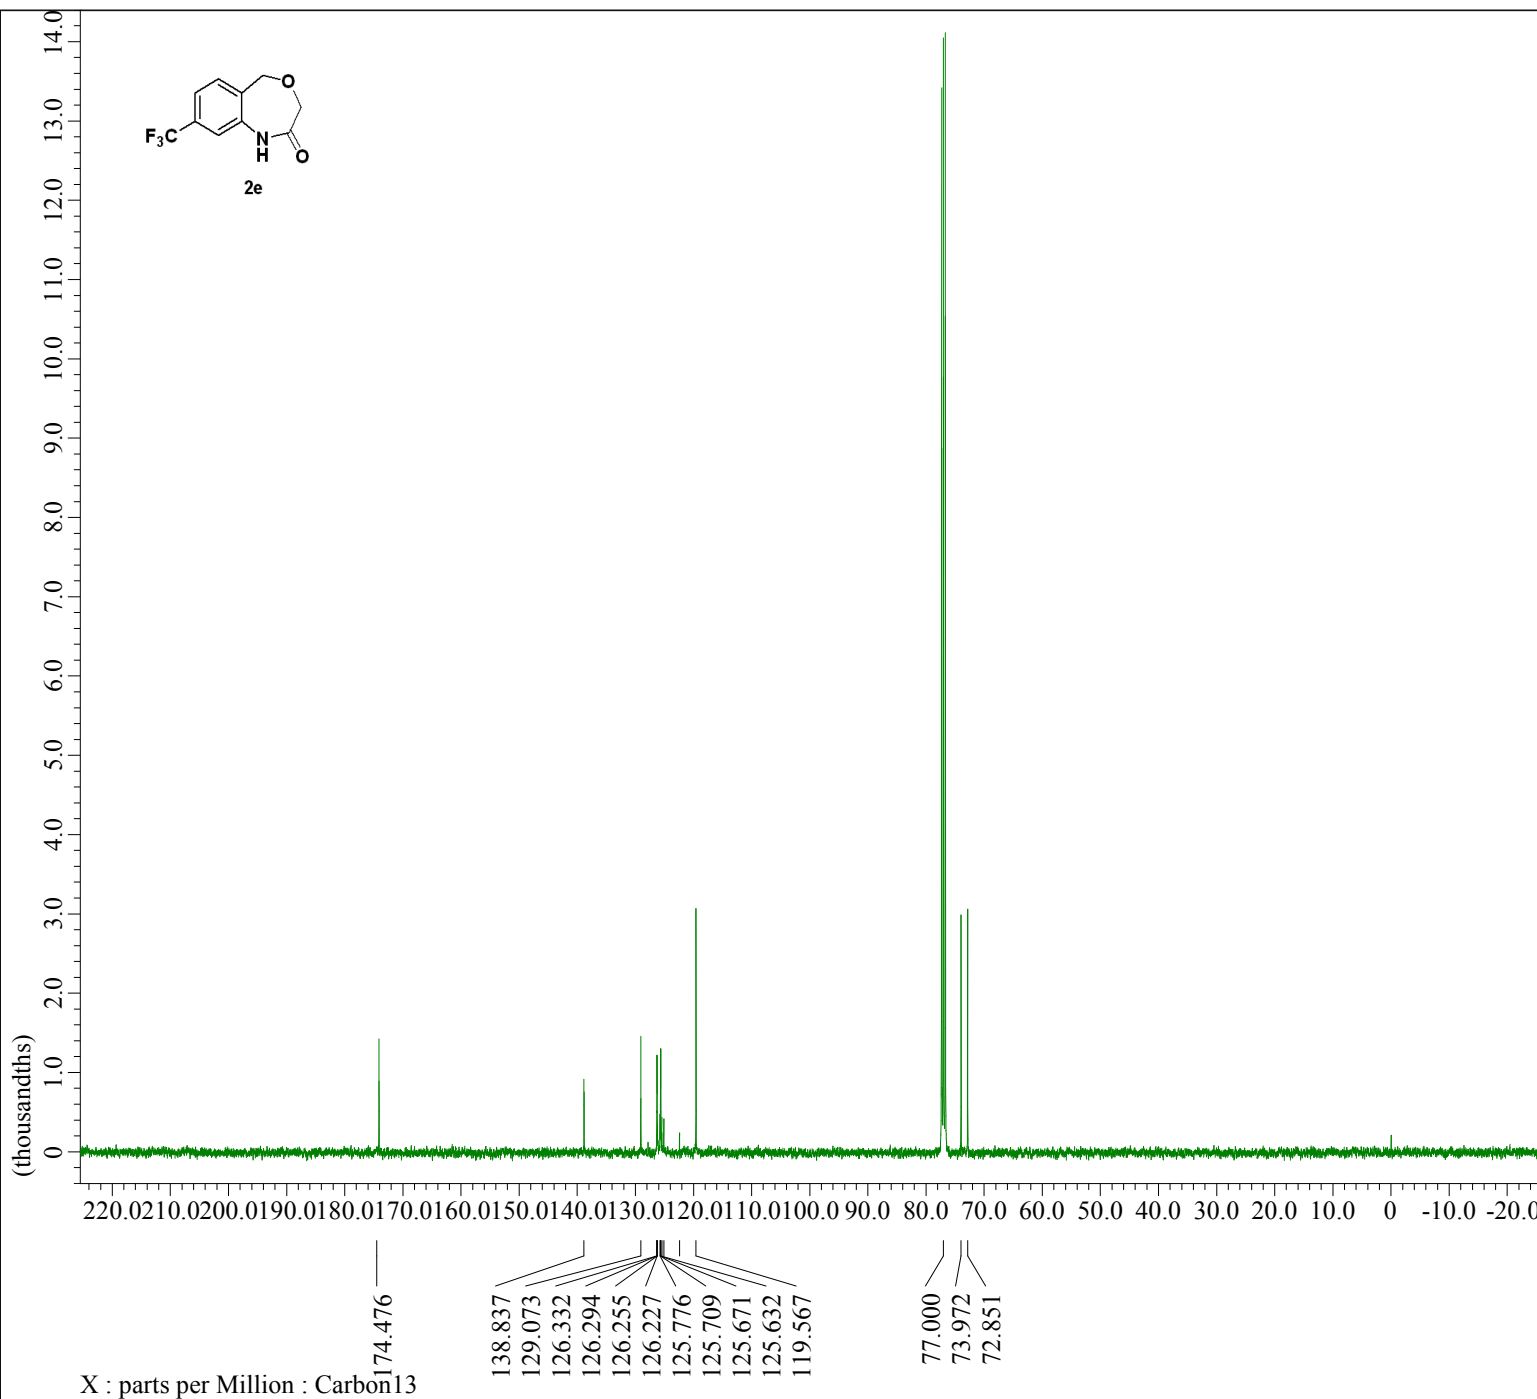

---- PROCESSING PARAMETERS ----  
sexp( 2.0[Hz], 0.0[s] )  
trapezoid( 0[%], 0[%], 80[%], 100[%] )  
zerofill( 1 )  
fft( 1, TRUE, TRUE )  
machinephase  
ppm

Derived from: LK121402\_Carbon-1-1.jdf

Filename = LK121402\_Carbon-1-  
Author = delta  
Experiment = carbon.jxp  
Sample Id = LK121402  
Solvent = CHLOROFORM-D  
Actual\_Start\_Time = 14-DEC-2016 16:31:  
Revision\_Time = 4-AUG-2017 18:53:

Comment = single pulse decou  
Data\_Format = 1D COMPLEX  
Dim\_Size = 26214  
Dim\_Title = Carbon13  
Dim\_Units = [ppm]  
Dimensions = X  
Spectrometer = JNM-ECZ400S/L1

Field\_Strength = 9.389766[T] (400[M  
X\_Acq\_Duration = 1.03809024[s]  
X\_Domain = 13C  
X\_Freq = 100.52530333[MHz]  
X\_Offset = 100[ppm]  
X\_Points = 32768  
X\_Prescans = 4  
X\_Resolution = 0.96330739[Hz]  
X\_Sweep = 31.56565657[kHz]  
X\_Sweep\_Clippped = 25.25252525[kHz]  
Irr\_Domain = Proton  
Irr\_Freq = 399.78219838[MHz]  
Irr\_Offset = 5[ppm]  
Clipped = FALSE  
Scans = 1024  
Total\_Scans = 1024

Relaxation\_Delay = 2[s]  
Recvr Gain = 50  
Temp\_Get = 21.9[dC]  
X\_90\_Width = 8.8[us]  
X\_Acq\_Time = 1.03809024[s]  
X\_Angle = 30[deg]  
X\_Atn = 3.4[dB]  
X\_Pulse = 2.93333333[us]  
Irr\_Atn\_Dec = 23.66[dB]  
Irr\_Atn\_Dec\_Calc = 23.66[dB]  
Irr\_Atn\_Dec\_Default\_Calc = 23.66[dB]  
Irr\_Atn\_Noie = 23.66[dB]  
Irr\_Dec\_Bandwidth\_Hz = 4.7826087[kHz]  
Irr\_Dec\_Bandwidth\_Ppm = 11.96303566[ppm]  
Irr\_Dec\_Freq = 399.78219838[MHz]



---- PROCESSING PARAMETERS ----

```
sexp( 0.2[Hz], 0.0[s] )
trapezoid( 0[%], 0[%], 80[%], 100[%] )
zerofill( 1 )
fft( 1, TRUE, TRUE )
machinephase
ppm
```

Derived from: LK1206-4\_single\_pulse-1-1.jdf

```
Filename      = LK1206-4_single_pulse
Author       = delta
Experiment    = single_pulse.jxp
Sample Id    = LK1206-4
Solvent      = CHLOROFORM-D
Actual_Start_Time = 6-DEC-2016 11:42:25
Revision_Time  = 4-AUG-2017 18:54:57
```

```
Comment      = single_pulse
Data_Format   = 1D COMPLEX
Dim Size     = 13107
Dim Title    = Fluorine19
Dim Units    = [ppm]
Dimensions   = X
Spectrometer = JNM-ECZ400S/L1
```

```
Field_Strength = 9.389766[T] (400[MHz])
X_Acq_Duration = 83.88608[ms]
X_Domain      = 19F
X_Freq       = 376.17105393[MHz]
X_Offset     = -100[ppm]
X_Points     = 16384
X_Prescans   = 1
X_Resolution = 11.92092896[Hz]
X_Sweep      = 195.3125[kHz]
X_Sweep_Clip = 156.25[kHz]
Irr_Domain   = Fluorine19
Irr_Freq    = 376.17105393[MHz]
Irr_Offset  = 5[ppm]
Tri_Domain  = Fluorine19
Tri_Freq   = 376.17105393[MHz]
Tri_Offset = 5[ppm]
Clipped    = FALSE
Scans     = 8
Total_Scans = 8
```

```
Relaxation_Delay = 5[s]
Recvr_Gain       = 50
Temp_Get        = 18.8[dC]
X_90_Width     = 10[us]
X_Acq_Time     = 83.88608[ms]
X_Angle        = 45[deg]
X_Atn         = 0.9[dB]
X_Pulse       = 5[us]
Irr_Mode      = Off
Tri_Mode     = Off
Dante_Loop   = 500
Dante_Presat = FALSE
```

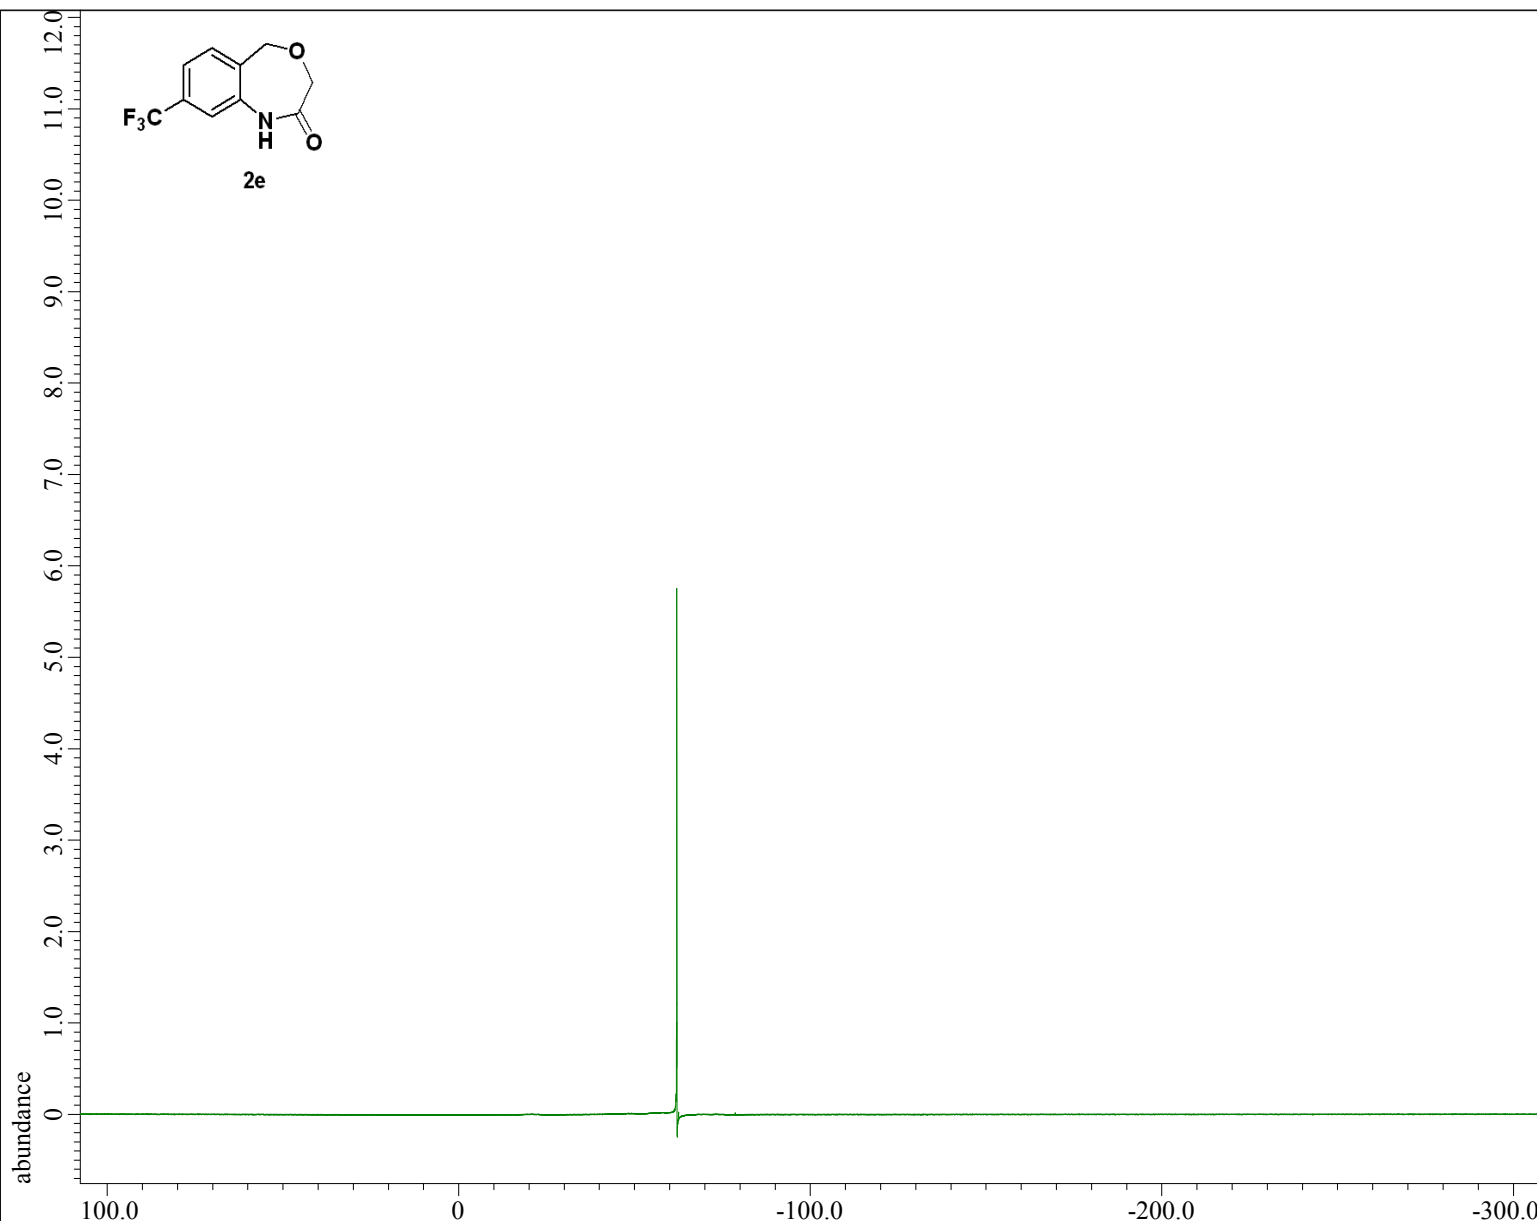

X : parts per Million : Fluorine19

-62.035

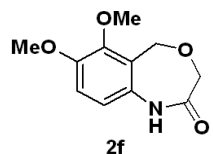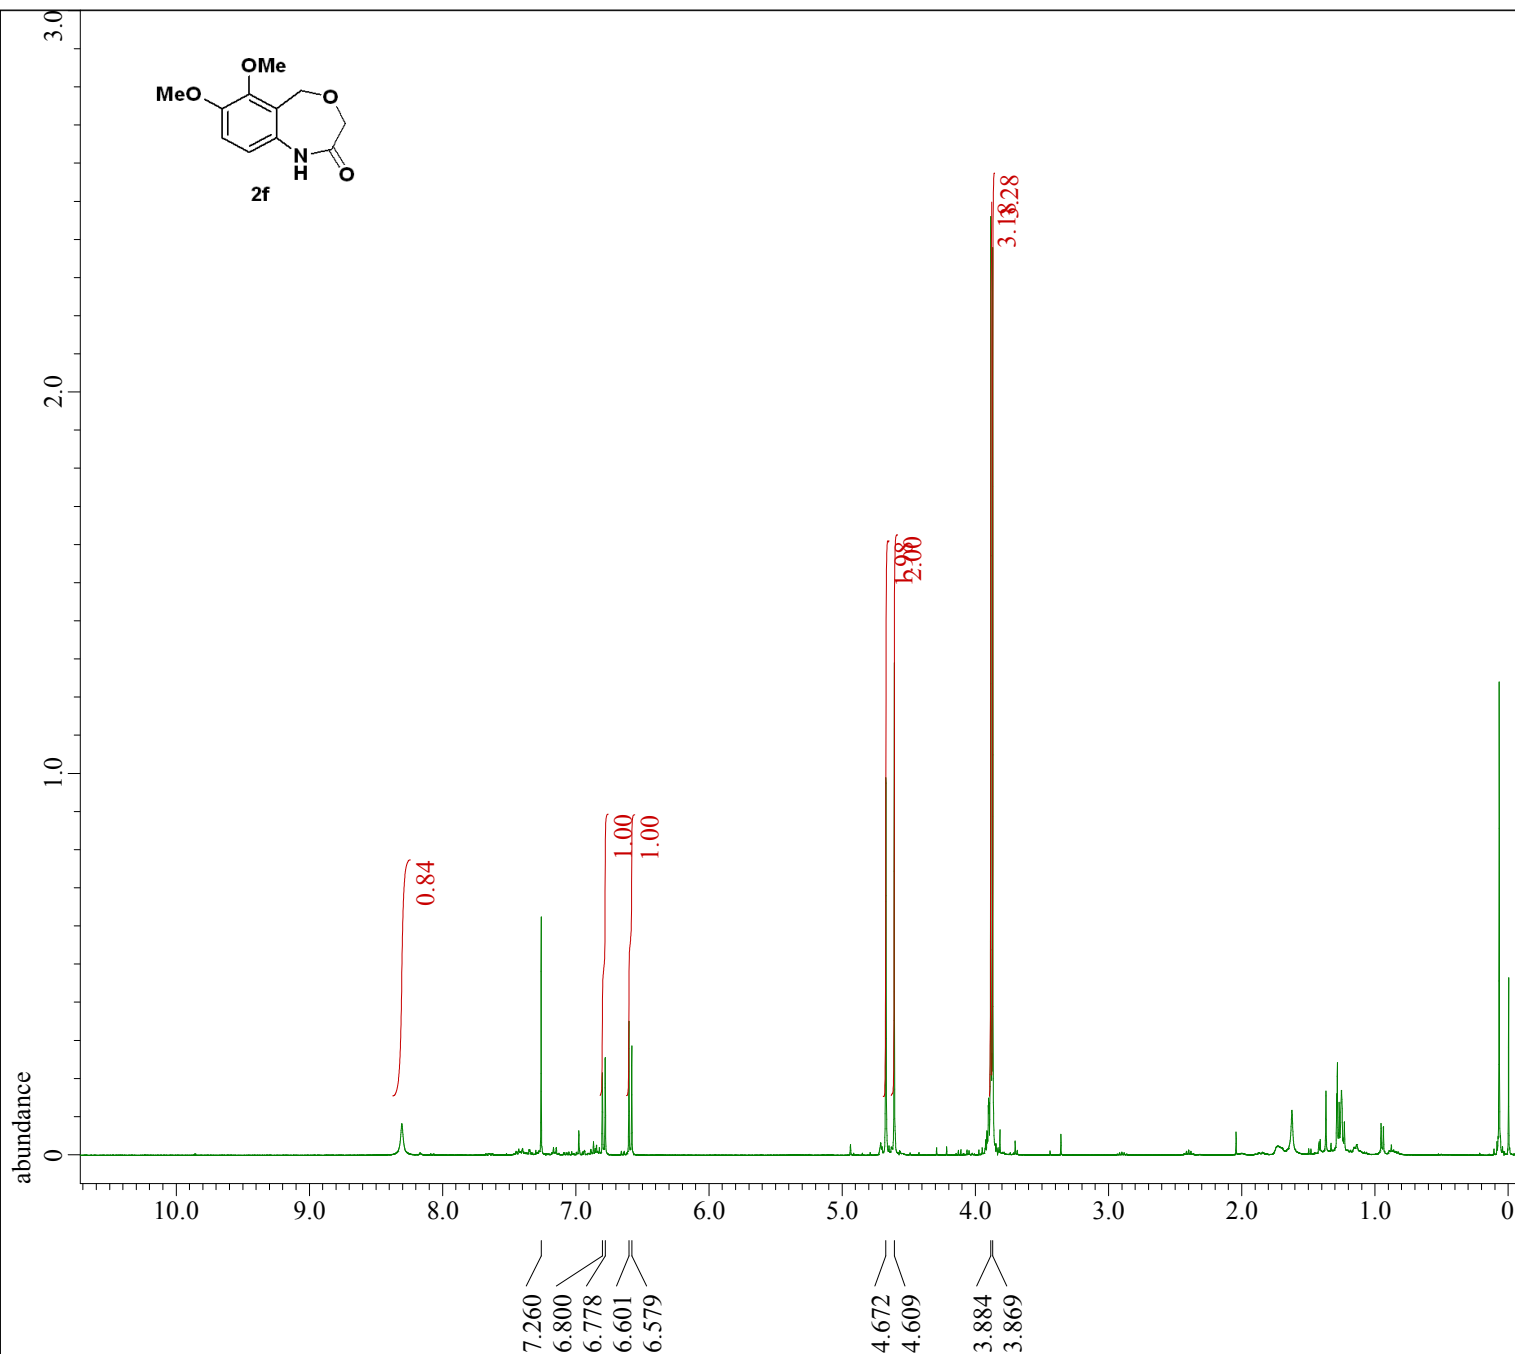

X : parts per Million : Proton

---- PROCESSING PARAMETERS ----  
sexp( 0.2[Hz], 0.0[s] )  
trapezoid( 0[%], 0[%], 80[%], 100[%] )  
zerofill( 1 )  
fft( 1, TRUE, TRUE )  
machinephase  
ppm

Derived from: LK032117-1\_Proton-1-1.jdf

Filename = LK032117-1\_Proton-1-3  
Author = delta  
Experiment = proton.jxp  
Sample Id = LK032117-1  
Solvent = CHLOROFORM-D  
Actual\_Start\_Time = 21-MAR-2017 10:14:14  
Revision\_Time = 4-AUG-2017 18:58:24

Comment = single\_pulse  
Data\_Format = 1D COMPLEX  
Dim\_Size = 13107  
Dim\_Title = Proton  
Dim\_Units = [ppm]  
Dimensions = X  
Spectrometer = JNM-ECZ400S/L1

Field\_Strength = 9.389766[T] (400[MHz])  
X\_Acq\_Duration = 2.18628096[s]  
X\_Domain = 1H  
X\_Freq = 399.78219838[MHz]  
X\_Offset = 5[ppm]  
X\_Points = 16384  
X\_Prescans = 1  
X\_Resolution = 0.45739775[Hz]  
X\_Sweep = 7.4940048[kHz]  
X\_Sweep\_Clippped = 5.99520384[kHz]  
Irr\_Domain = Proton  
Irr\_Freq = 399.78219838[MHz]  
Irr\_Offset = 5[ppm]  
Tri\_Domain = Proton  
Tri\_Freq = 399.78219838[MHz]  
Tri\_Offset = 5[ppm]  
Clipped = FALSE  
Scans = 8  
Total\_Scans = 8

Relaxation\_Delay = 5[s]  
Recvr\_Gain = 56  
Temp\_Get = 21.3[dC]  
X\_90\_Width = 9.5[us]  
X\_Acq\_Time = 2.18628096[s]  
X\_Angle = 45[deg]  
X\_Atn = 2[dB]  
X\_Pulse = 4.75[us]  
Irr\_Mode = Off  
Tri\_Mode = Off  
Dante\_Loop = 500  
Dante\_Presat = FALSE

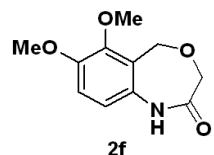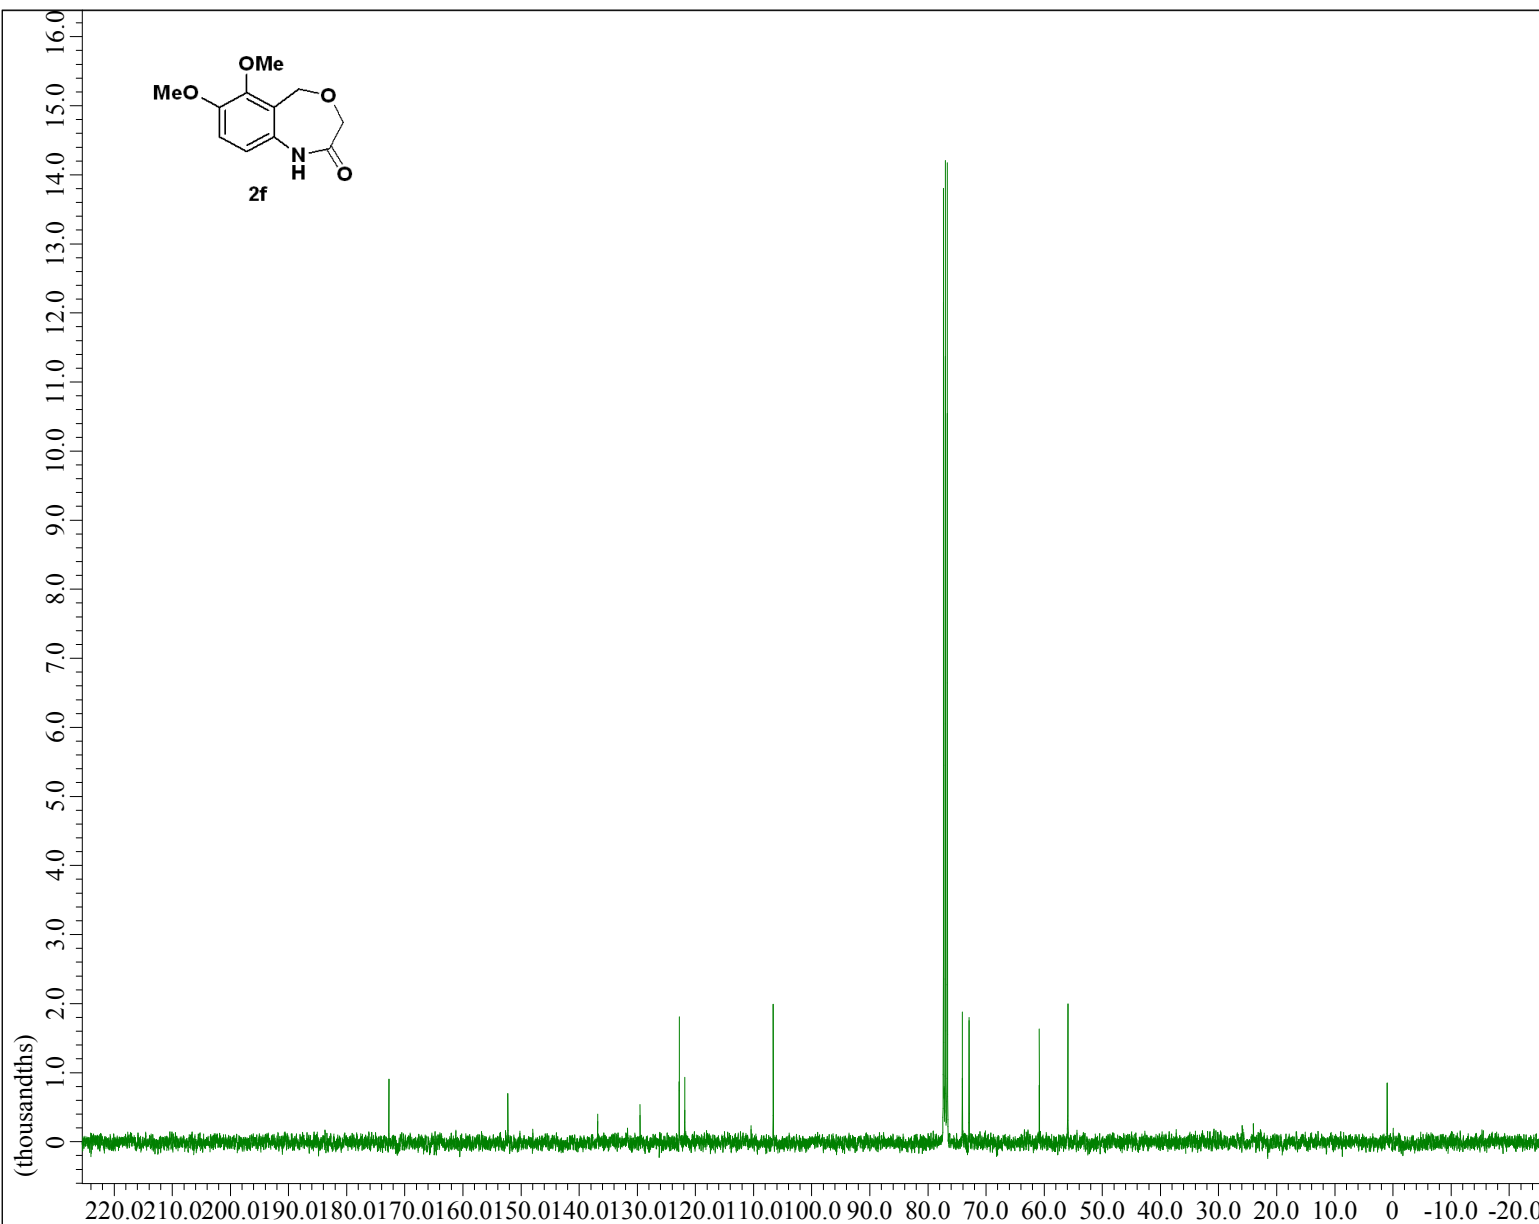

X : parts per Million : Carbon13

---- PROCESSING PARAMETERS ----  
sexp( 2.0[Hz], 0.0[s] )  
trapezoid( 0[%], 0[%], 80[%], 100[%] )  
zerofill( 1 )  
fft( 1, TRUE, TRUE )  
machinephase  
ppm

Derived from: LK032117-1\_Carbon-1-1.jdf

Filename = LK032117-1\_Carbon-  
Author = delta  
Experiment = carbon.jxp  
Sample Id = LK032117-1  
Solvent = CHLOROFORM-D  
Actual\_Start\_Time = 21-MAR-2017 10:35:  
Revision\_Time = 4-AUG-2017 19:01:

Comment = single pulse decou  
Data\_Format = 1D COMPLEX  
Dim\_Size = 26214  
Dim\_Title = Carbon13  
Dim\_Units = [ppm]  
Dimensions = X  
Spectrometer = JNM-ECZ400S/L1

Field\_Strength = 9.389766[T] (400[M  
X\_Acq\_Duration = 1.03809024[s]  
X\_Domain = 13C  
X\_Freq = 100.52530333[MHz]  
X\_Offset = 100[ppm]  
X\_Points = 32768  
X\_Prescans = 4  
X\_Resolution = 0.96330739[Hz]  
X\_Sweep = 31.56565657[kHz]  
X\_Sweep\_Clippped = 25.25252525[kHz]  
Irr\_Domain = Proton  
Irr\_Freq = 399.78219838[MHz]  
Irr\_Offset = 5[ppm]  
Clipped = FALSE  
Scans = 263  
Total\_Scans = 263

Relaxation\_Delay = 2[s]  
Recvr Gain = 50  
Temp\_Get = 21.7[dC]  
X\_90\_Width = 8.8[us]  
X\_Acq\_Time = 1.03809024[s]  
X\_Angle = 30[deg]  
X\_Atn = 3.4[dB]  
X\_Pulse = 2.93333333[us]  
Irr\_Atn\_Dec = 23.66[dB]  
Irr\_Atn\_Dec\_Calc = 23.66[dB]  
Irr\_Atn\_Dec\_Default\_Calc = 23.66[dB]  
Irr\_Atn\_Noex = 23.66[dB]  
Irr\_Dec\_Bandwidth\_Hz = 4.7826087[kHz]  
Irr\_Dec\_Bandwidth\_Ppm = 11.96303566[ppm]  
Irr\_Dec\_Freq = 399.78219838[MHz]

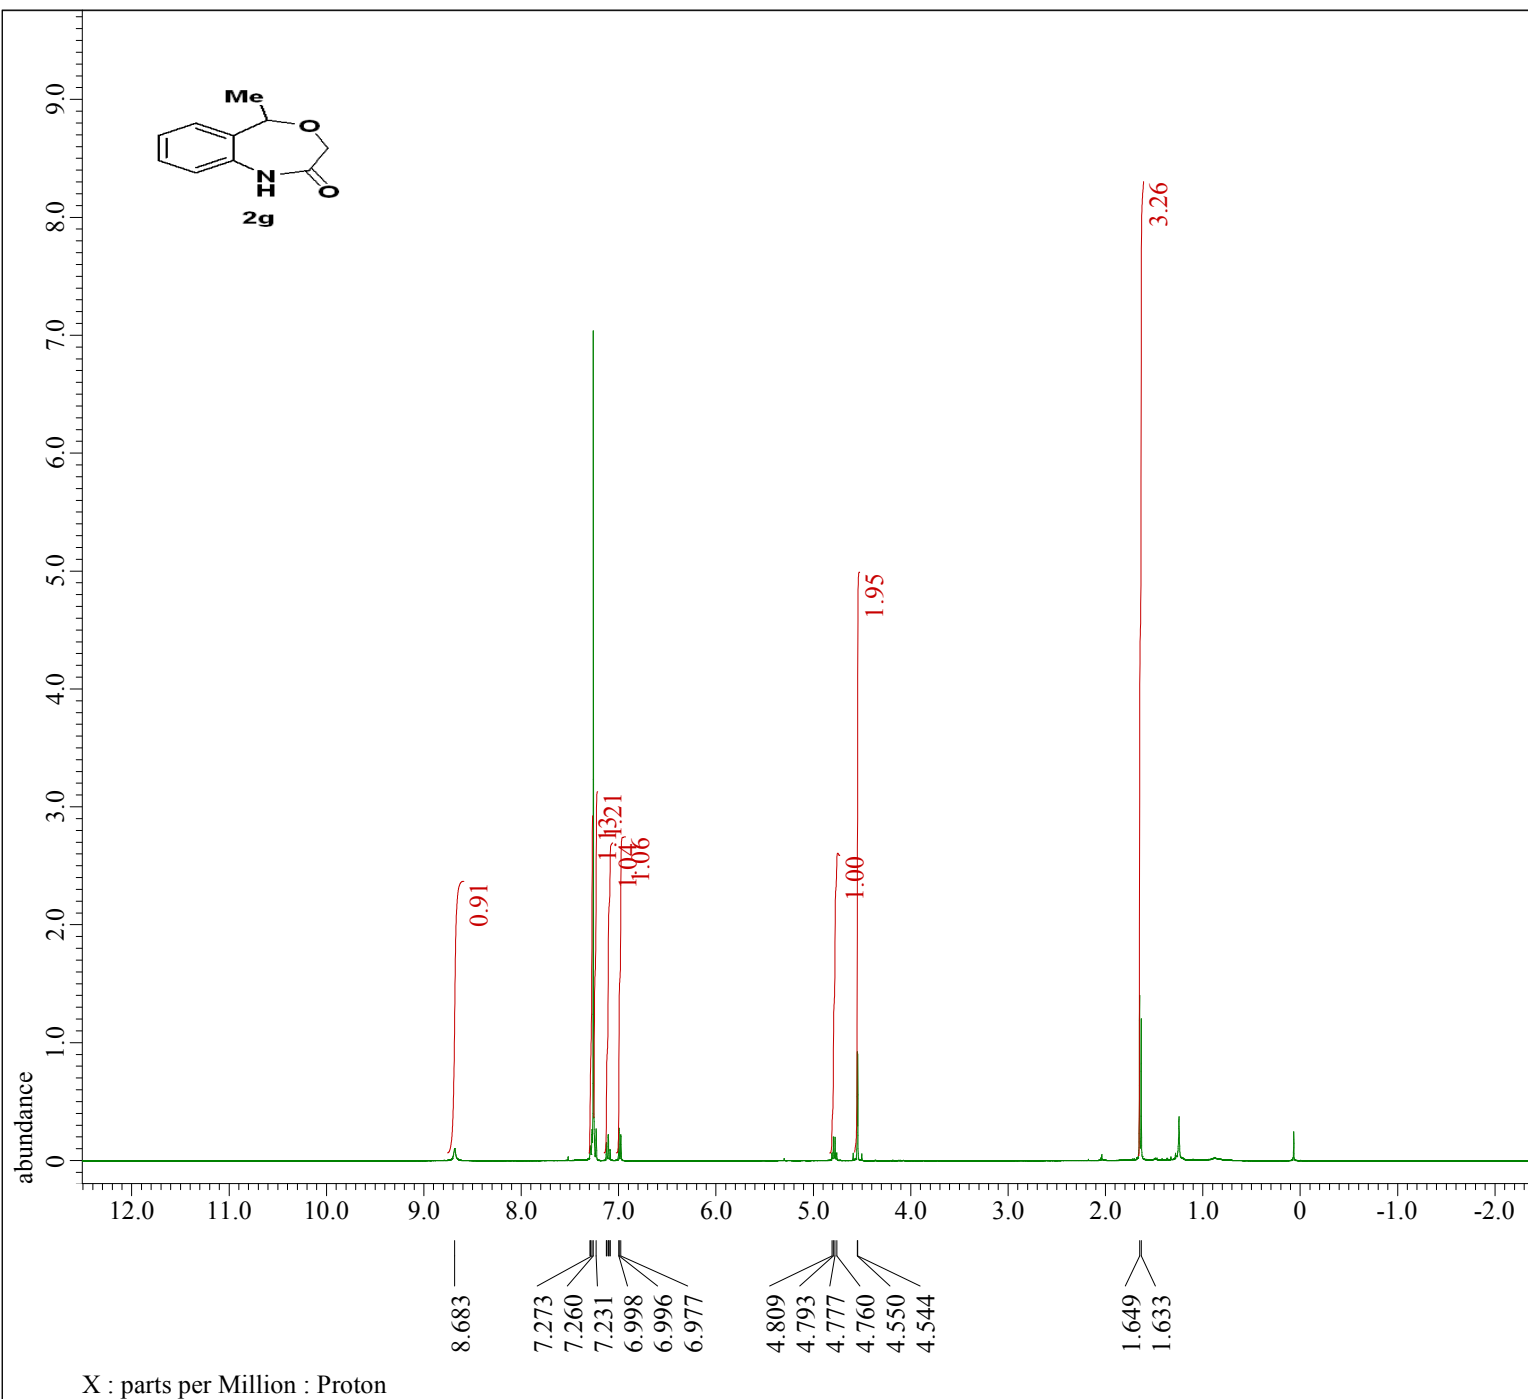

---- PROCESSING PARAMETERS ----  
sexp( 0.2[Hz], 0.0[s] )  
trapezoid( 0[%], 0[%], 80[%], 100[%] )  
zerofill( 1 )  
fft( 1, TRUE, TRUE )  
machinephase  
ppm

Filename = LK1031-1\_Proton-1-5.j  
Author = delta  
Experiment = proton.jxp  
Sample Id = LK1031-1  
Solvent = CHLOROFORM-D  
Actual\_Start\_Time = 31-OCT-2016 14:48:09  
Revision\_Time = 4-AUG-2017 22:28:58

Comment = single\_pulse  
Data\_Format = 1D COMPLEX  
Dim\_Size = 13107  
Dim\_Title = Proton  
Dim\_Units = [ppm]  
Dimensions = X  
Spectrometer = JNM-ECZ400S/L1

Field\_Strength = 9.389766[T] (400[MHz])  
X\_Acq\_Duration = 2.18628096[s]  
X\_Domain = 1H  
X\_Freq = 399.78219838[MHz]  
X\_Offset = 5[ppm]  
X\_Points = 16384  
X\_Prescans = 1  
X\_Resolution = 0.45739775[Hz]  
X\_Sweep = 7.4940048[kHz]  
X\_Sweep\_Clippped = 5.99520384[kHz]  
Irr\_Domain = Proton  
Irr\_Freq = 399.78219838[MHz]  
Irr\_Offset = 5[ppm]  
Tri\_Domain = Proton  
Tri\_Freq = 399.78219838[MHz]  
Tri\_Offset = 5[ppm]  
Clipped = FALSE  
Scans = 8  
Total\_Scans = 8

Relaxation\_Delay = 5[s]  
Recvr\_Gain = 56  
Temp\_Get = 14.2[dC]  
X\_90\_Width = 9.5[us]  
X\_Acq\_Time = 2.18628096[s]  
X\_Angle = 45[deg]  
X\_Atn = 2[dB]  
X\_Pulse = 4.75[us]  
Irr\_Mode = Off  
Tri\_Mode = Off  
Dante\_Loop = 500  
Dante\_Presat = FALSE



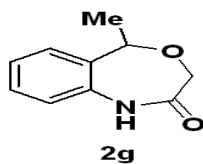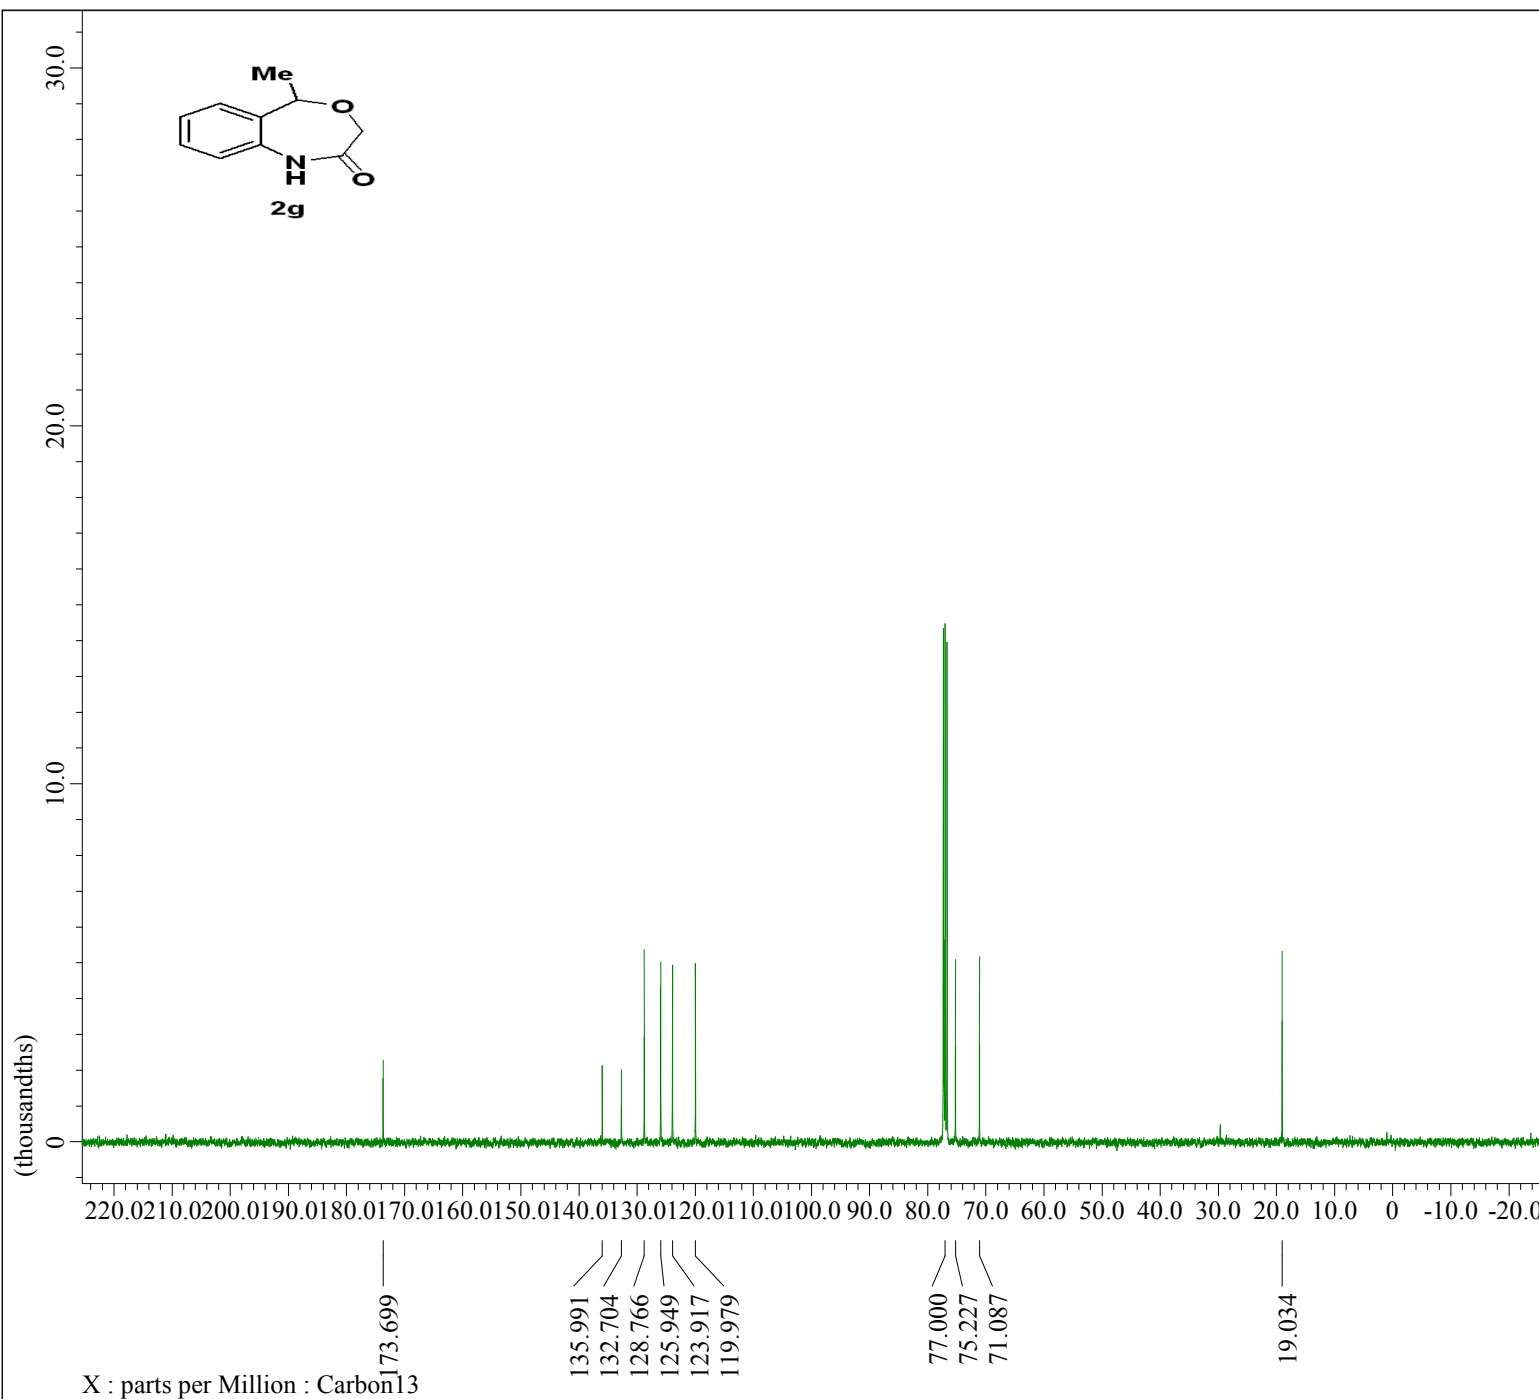

---- PROCESSING PARAMETERS ----  
sexf( 2.0[Hz], 0.0[s] )  
trapezoid( 0[%], 0[%], 80[%], 100[%] )  
zerofill( 1 )  
fft( 1, TRUE, TRUE )  
machinephase  
ppm

Derived from: LK1031-1\_Carbon-1-1.jdf

Filename = LK1031-1\_Carbon-1-  
Author = delta  
Experiment = carbon.jxp  
Sample Id = LK1031-1  
Solvent = CHLOROFORM-D  
Actual\_Start\_Time = 31-OCT-2016 15:25:  
Revision\_Time = 4-AUG-2017 22:35:

Comment = single pulse decou  
Data\_Format = 1D COMPLEX  
Dim\_Size = 26214  
Dim\_Title = Carbon13  
Dim\_Units = [ppm]  
Dimensions = X  
Spectrometer = JNM-ECZ400S/L1

Field\_Strength = 9.389766[T] (400[M  
X\_Acq\_Duration = 1.03809024[s]  
X\_Domain = 13C  
X\_Freq = 100.52530333[MHz]  
X\_Offset = 100[ppm]  
X\_Points = 32768  
X\_Prescans = 4  
X\_Resolution = 0.96330739[Hz]  
X\_Sweep = 31.56565657[kHz]  
X\_Sweep\_Clippped = 25.25252525[kHz]  
Irr\_Domain = Proton  
Irr\_Freq = 399.78219838[MHz]  
Irr\_Offset = 5[ppm]  
Clipped = FALSE  
Scans = 295  
Total\_Scans = 295

Relaxation\_Delay = 2[s]  
Recvr Gain = 50  
Temp\_Get = 14.5[dC]  
X\_90\_Width = 8.8[us]  
X\_Acq\_Time = 1.03809024[s]  
X\_Angle = 30[deg]  
X\_Atn = 3.4[dB]  
X\_Pulse = 2.93333333[us]  
Irr\_Atn\_Dec = 23.66[dB]  
Irr\_Atn\_Dec\_Calc = 23.66[dB]  
Irr\_Atn\_Dec\_Default\_Calc = 23.66[dB]  
Irr\_Atn\_Noec = 23.66[dB]  
Irr\_Dec\_Bandwidth\_Hz = 4.7826087[kHz]  
Irr\_Dec\_Bandwidth\_Ppm = 11.96303566[ppm]  
Irr\_Dec\_Freq = 399.78219838[MHz]

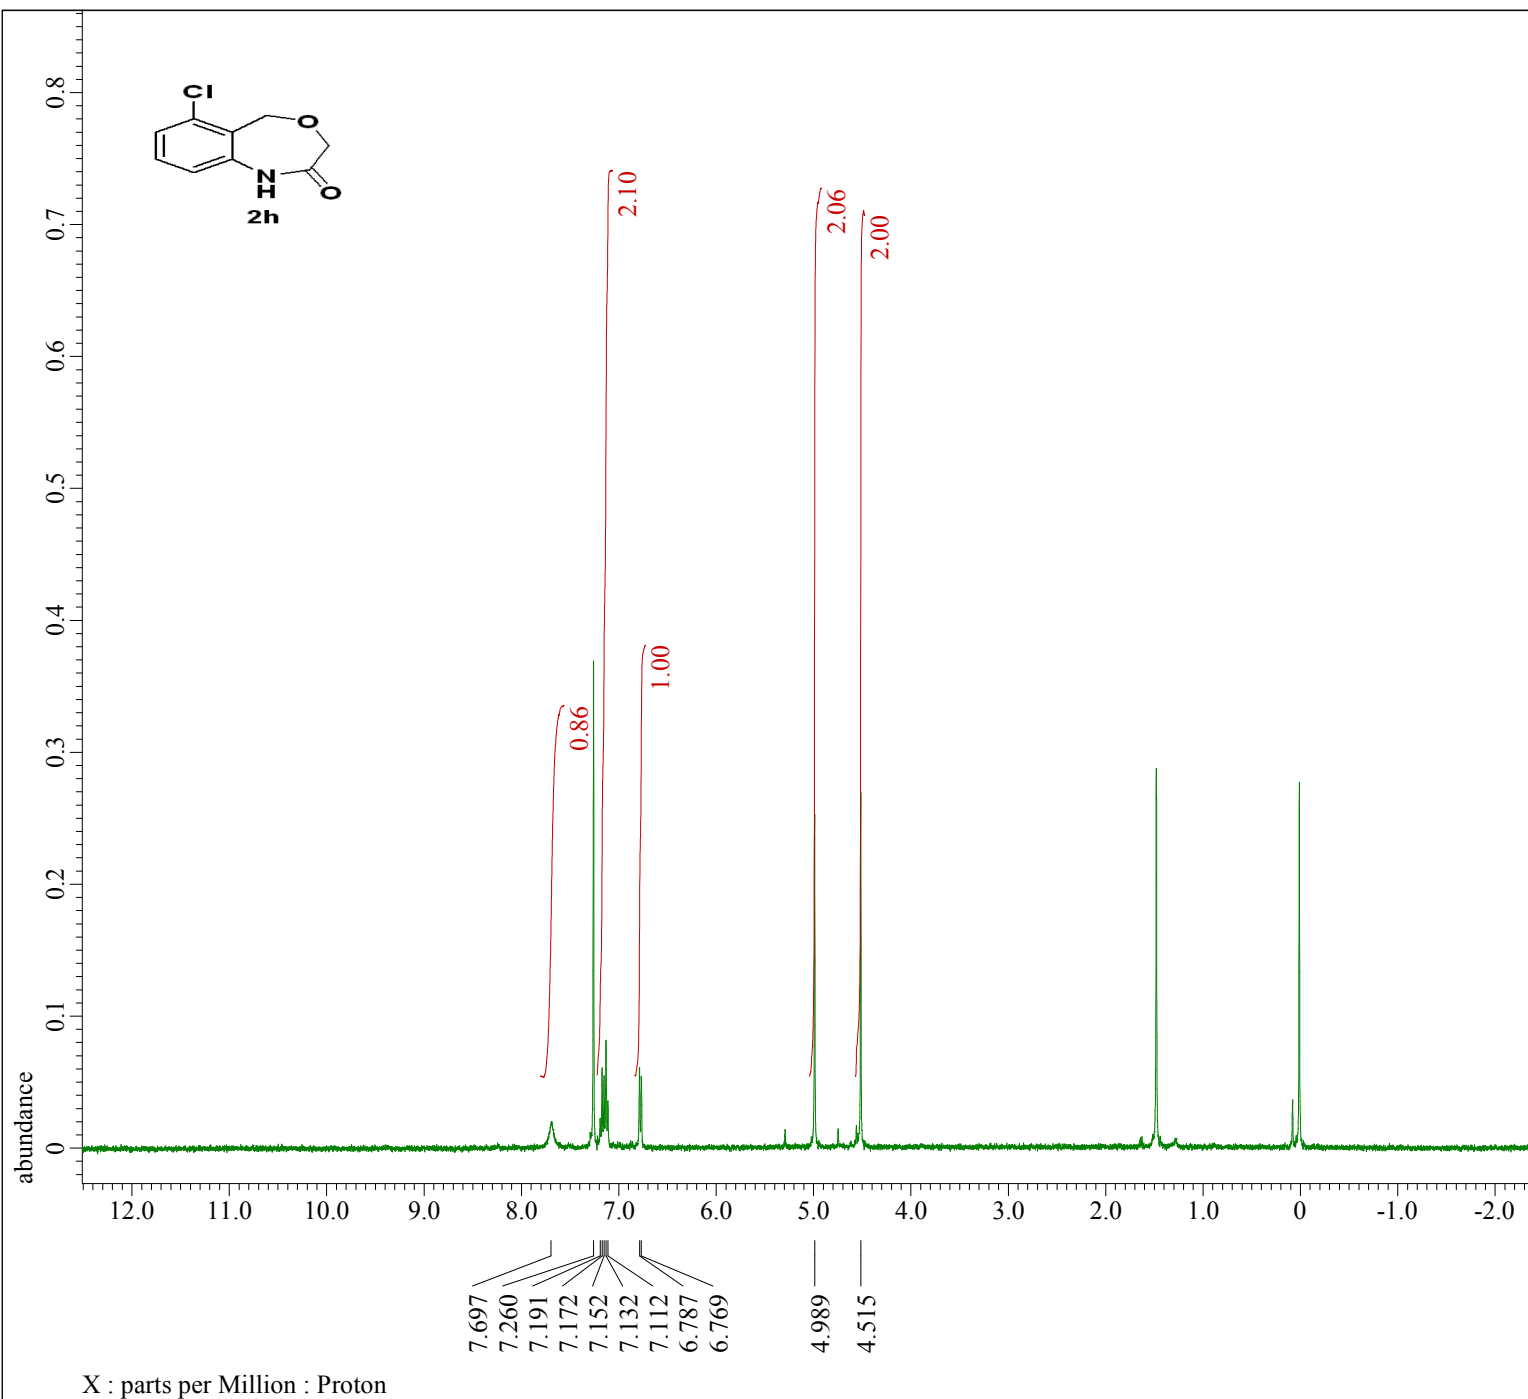

---- PROCESSING PARAMETERS ----  
sexp( 0.2[Hz], 0.0[s] )  
trapezoid( 0[%], 0[%], 80[%], 100[%] )  
zerofill( 1 )  
fft( 1, TRUE, TRUE )  
machinephase  
ppm

Filename = LK012401\_Proton-1-4.j  
Author = delta  
Experiment = proton.jxp  
Sample Id = LK012401  
Solvent = CHLOROFORM-D  
Actual\_Start\_Time = 24-JAN-2017 10:37:28  
Revision\_Time = 4-AUG-2017 22:44:47

Comment = single\_pulse  
Data\_Format = 1D COMPLEX  
Dim\_Size = 13107  
Dim\_Title = Proton  
Dim\_Units = [ppm]  
Dimensions = X  
Spectrometer = JNM-ECZ400S/L1

Field\_Strength = 9.389766[T] (400[MHz])  
X\_Acq\_Duration = 2.18628096[s]  
X\_Domain = 1H  
X\_Freq = 399.78219838[MHz]  
X\_Offset = 5[ppm]  
X\_Points = 16384  
X\_Prescans = 1  
X\_Resolution = 0.45739775[Hz]  
X\_Sweep = 7.4940048[kHz]  
X\_Sweep\_Clippped = 5.99520384[kHz]  
Irr\_Domain = Proton  
Irr\_Freq = 399.78219838[MHz]  
Irr\_Offset = 5[ppm]  
Tri\_Domain = Proton  
Tri\_Freq = 399.78219838[MHz]  
Tri\_Offset = 5[ppm]  
Clipped = FALSE  
Scans = 8  
Total\_Scans = 8

Relaxation\_Delay = 5[s]  
Recvr\_Gain = 66  
Temp\_Get = 55[dC]  
X\_90\_Width = 9.5[us]  
X\_Acq\_Time = 2.18628096[s]  
X\_Angle = 45[deg]  
X\_Atn = 2[dB]  
X\_Pulse = 4.75[us]  
Irr\_Mode = Off  
Tri\_Mode = Off  
Dante\_Loop = 500  
Dante\_Presat = FALSE

X : parts per Million : Proton



---- PROCESSING PARAMETERS ----

```
sexp( 2.0[Hz], 0.0[s] )
trapezoid( 0[%], 0[%], 80[%], 100[%] )
zerofill( 1 )
fft( 1, TRUE, TRUE )
machinephase
ppm
```

Derived from: LK012401\_Carbon-1-1.jdf

```
Filename           = LK012401_Carbon-1-
Author             = delta
Experiment         = carbon.jxp
Sample_Id         = LK012401
Solvent           = CHLOROFORM-D
Actual_Start_Time  = 24-JAN-2017 10:50:
Revision_Time     = 4-AUG-2017 22:41:
```

```
Comment           = single pulse decou
Data_Format       = 1D COMPLEX
Dim_Size          = 26214
Dim_Title         = Carbon13
Dim_Units         = [ppm]
Dimensions        = X
Spectrometer      = JNM-ECZ400S/L1
```

```
Field_Strength    = 9.389766[T] (400[M
X_Acq_Duration    = 1.03809024[s]
X_Domain          = 13C
X_Freq            = 100.52530333[MHz]
X_Offset          = 100[ppm]
X_Points          = 32768
X_Prescans        = 4
X_Resolution      = 0.96330739[Hz]
X_Sweep           = 31.56565657[kHz]
X_Sweep_Clipped  = 25.25252525[kHz]
Irr_Domain        = Proton
Irr_Freq          = 399.78219838[MHz]
Irr_Offset        = 5[ppm]
Clipped           = TRUE
Scans             = 36000
Total_Scans       = 36000
```

```
Relaxation_Delay  = 2[s]
Recvr_Gain        = 50
Temp_Get          = 55[dC]
X_90_Width        = 8.8[us]
X_Acq_Time        = 1.03809024[s]
X_Angle           = 30[deg]
X_Atn             = 3.4[dB]
X_Pulse           = 2.93333333[us]
Irr_Atn_Dec       = 23.66[dB]
Irr_Atn_Dec_Calc = 23.66[dB]
Irr_Atn_Dec_Default_Calc = 23.66[dB]
Irr_Atn_Noise    = 23.66[dB]
Irr_Dec_Bandwidth_Hz = 4.7826087[kHz]
Irr_Dec_Bandwidth_Ppm = 11.96303566[ppm]
Irr_Dec_Freq      = 399.78219838[MHz]
```

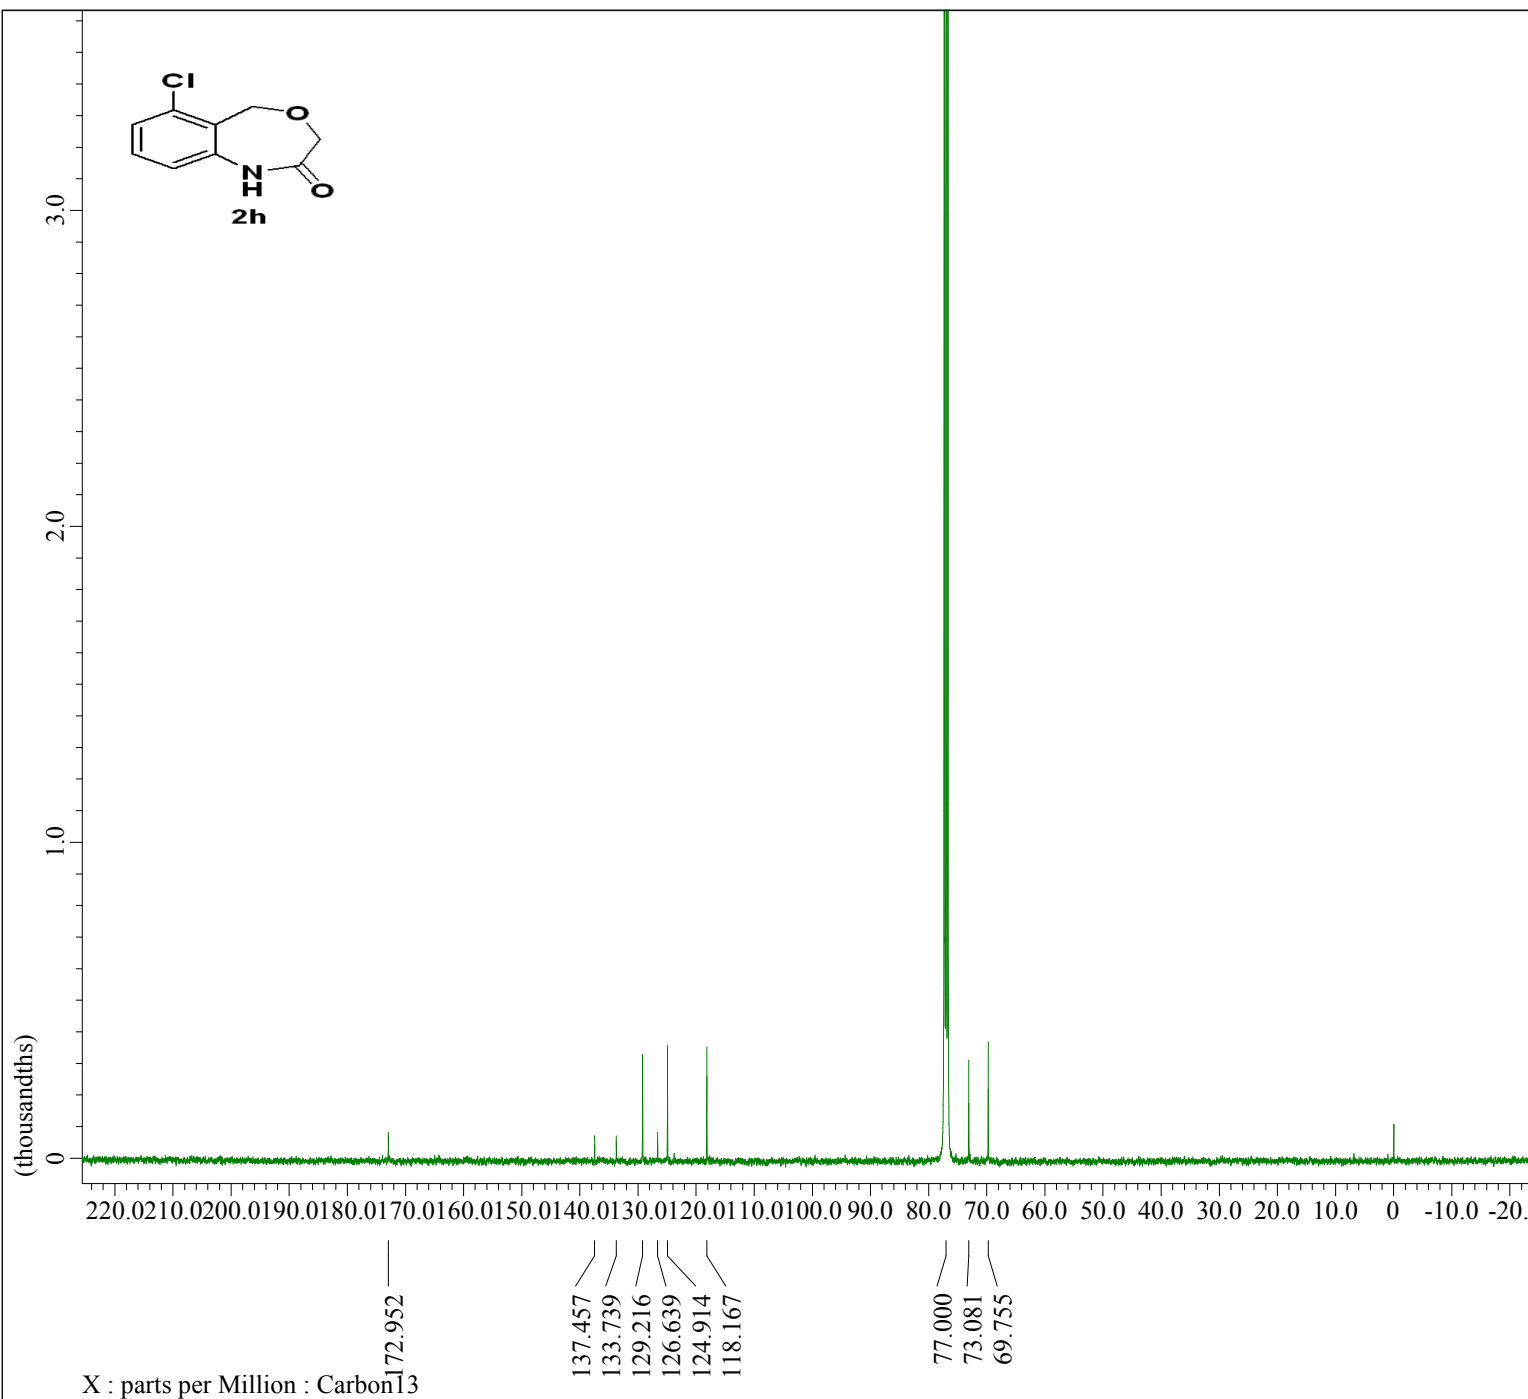



---- PROCESSING PARAMETERS ----

```
sexp( 0.2[Hz], 0.0[s] )
trapezoid( 0[%], 0[%], 80[%], 100[%] )
zerofill( 1 )
fft( 1, TRUE, TRUE )
machinephase
ppm
```

Derived from: LK012302\_Proton-1-1.jdf

```
Filename      = LK012302_Proton-1-3.j
Author       = delta
Experiment   = proton.jxp
Sample Id    = LK012302
Solvent      = CHLOROFORM-D
Actual_Start_Time = 23-JAN-2017 11:24:43
Revision_Time   = 4-AUG-2017 22:51:53
```

```
Comment       = single_pulse
Data_Format   = 1D COMPLEX
Dim_Size      = 13107
Dim_Title     = Proton
Dim_Units     = [ppm]
Dimensions    = X
Spectrometer  = JNM-ECZ400S/L1
```

```
Field_Strength = 9.389766[T] (400[MHz])
X_Acq_Duration = 2.18628096[s]
X_Domain       = 1H
X_Freq         = 399.78219838[MHz]
X_Offset       = 5[ppm]
X_Points       = 16384
X_Prescans     = 1
X_Resolution   = 0.45739775[Hz]
X_Sweep        = 7.4940048[kHz]
X_Sweep_Clippped = 5.99520384[kHz]
Irr_Domain     = Proton
Irr_Freq       = 399.78219838[MHz]
Irr_Offset     = 5[ppm]
Tri_Domain     = Proton
Tri_Freq       = 399.78219838[MHz]
Tri_Offset     = 5[ppm]
Clipped        = FALSE
Scans          = 8
Total_Scans    = 8
```

```
Relaxation_Delay = 5[s]
Recvr_Gain       = 56
Temp_Get         = 13[dC]
X_90_Width       = 9.5[us]
X_Acq_Time       = 2.18628096[s]
X_Angle          = 45[deg]
X_Atn            = 2[dB]
X_Pulse          = 4.75[us]
Irr_Mode         = Off
Tri_Mode         = Off
Dante_Loop       = 500
Dante_Presat     = FALSE
```

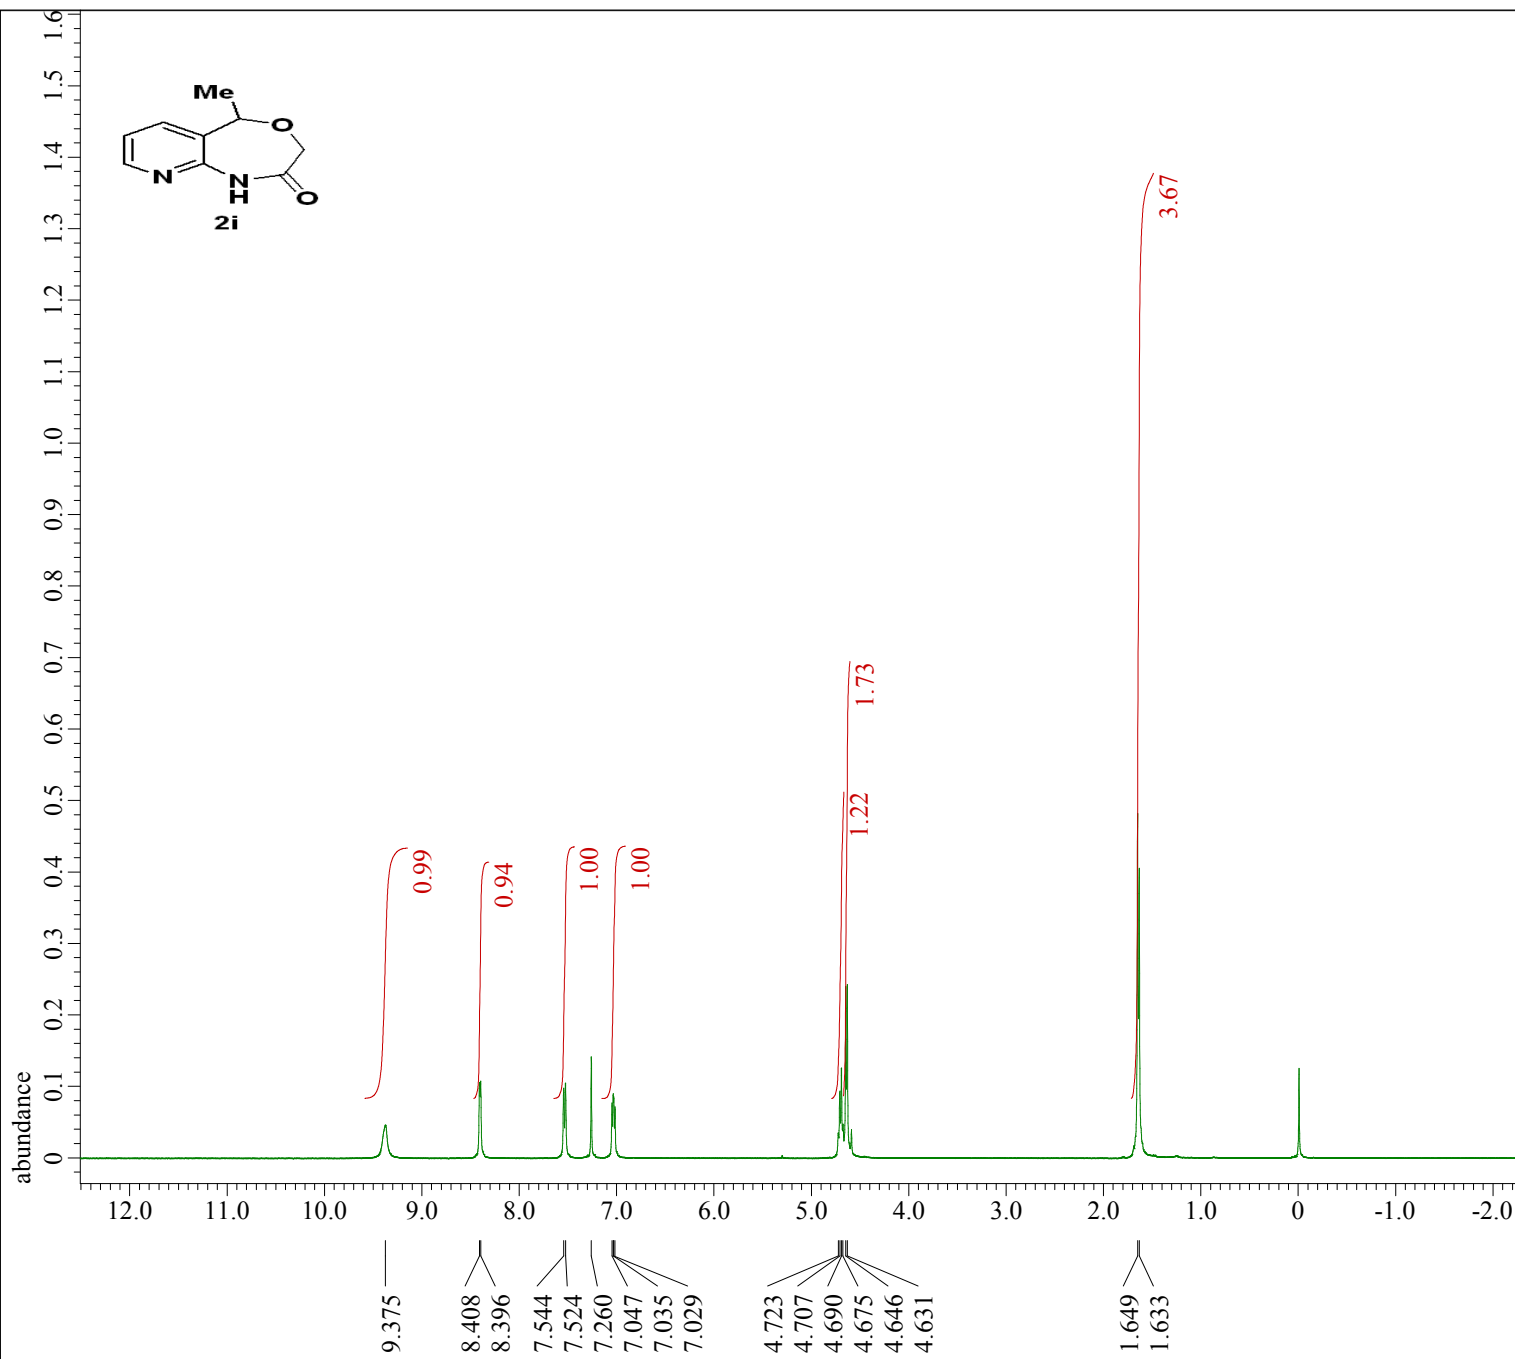

X : parts per Million : Proton

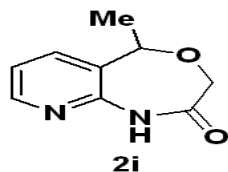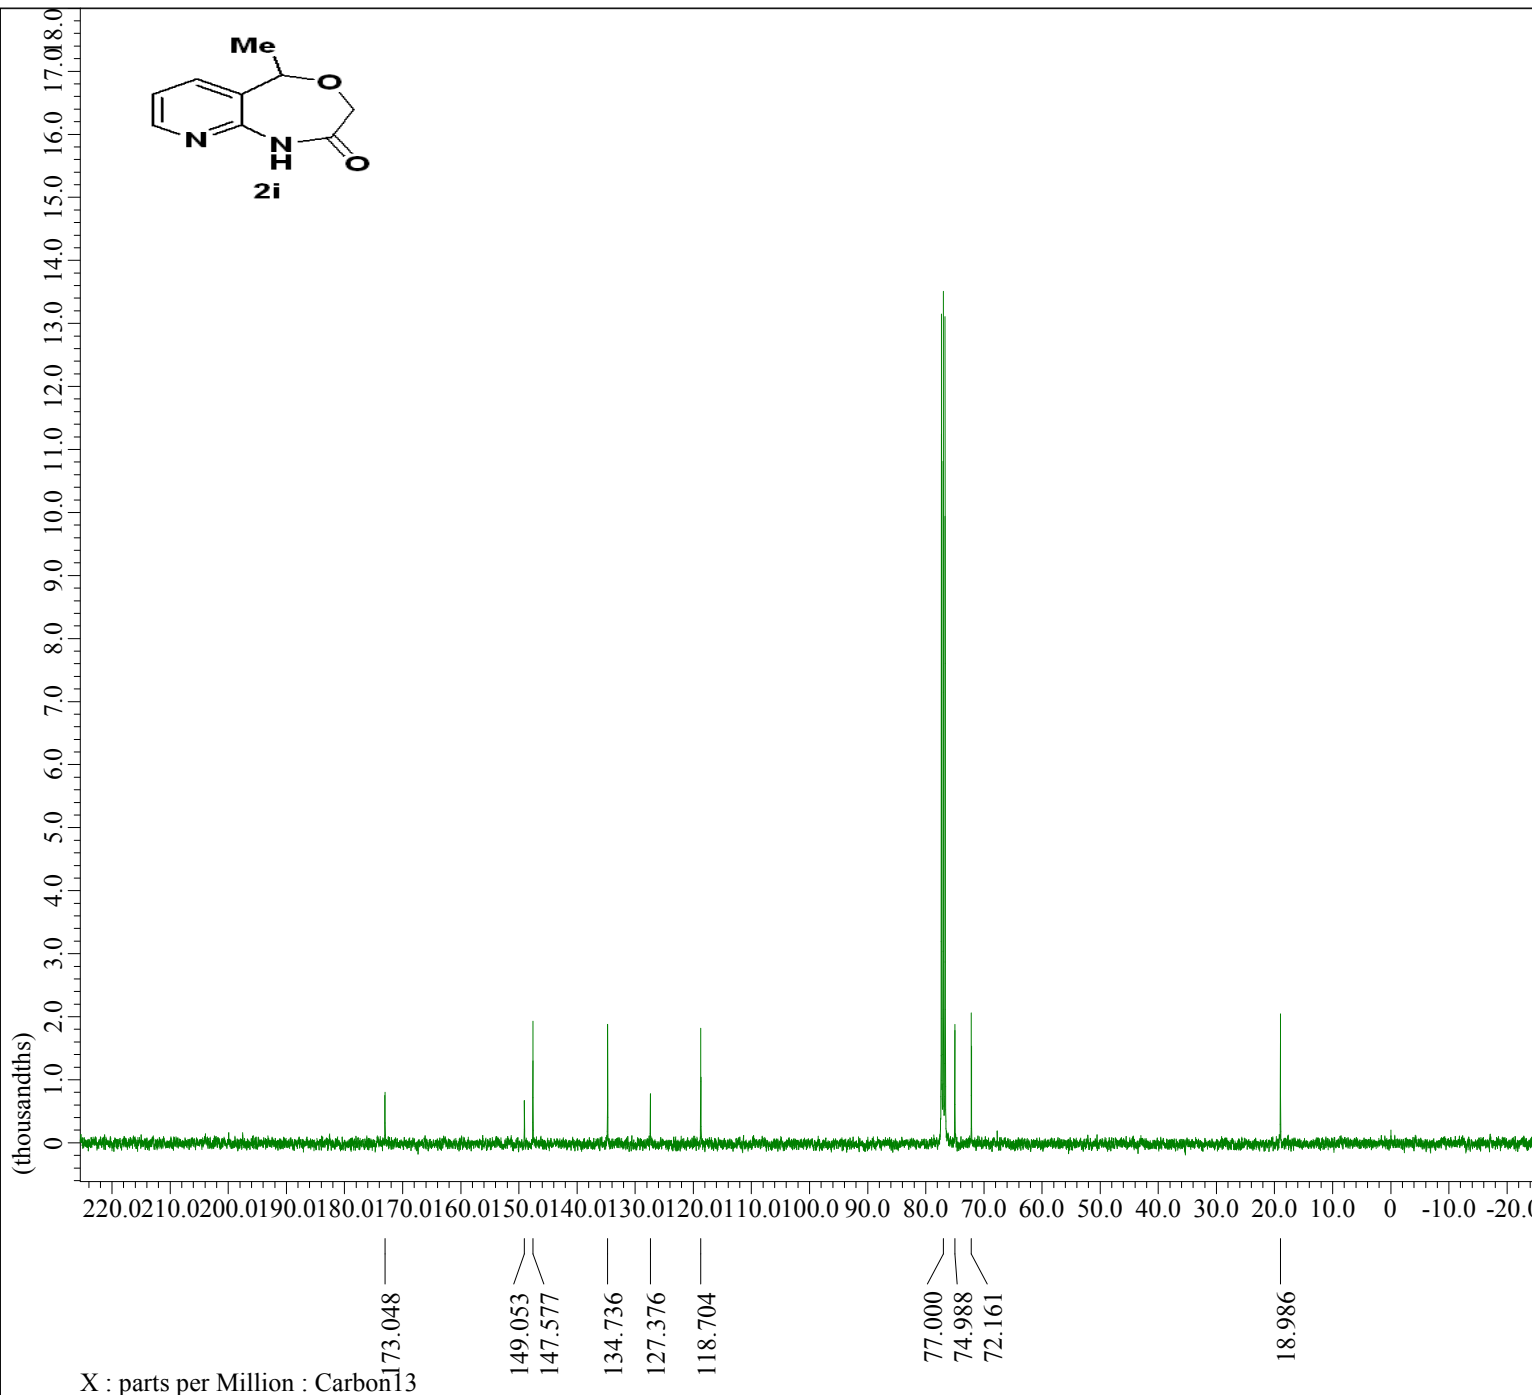

---- PROCESSING PARAMETERS ----  
sexp( 2.0[Hz], 0.0[s] )  
trapezoid( 0[%], 0[%], 80[%], 100[%] )  
zerofill( 1 )  
fft( 1, TRUE, TRUE )  
machinephase  
ppm

Filename = LK012302\_Carbon-1-  
Author = delta  
Experiment = carbon.jxp  
Sample Id = LK012302  
Solvent = CHLOROFORM-D  
Actual\_Start\_Time = 23-JAN-2017 11:30:  
Revision\_Time = 4-AUG-2017 22:57:

Comment = single pulse decou  
Data\_Format = 1D COMPLEX  
Dim\_Size = 26214  
Dim\_Title = Carbon13  
Dim\_Units = [ppm]  
Dimensions = X  
Spectrometer = JNM-ECZ400S/L1

Field\_Strength = 9.389766[T] (400[M]  
X\_Acq\_Duration = 1.03809024[s]  
X\_Domain = 13C  
X\_Freq = 100.52530333[MHz]  
X\_Offset = 100[ppm]  
X\_Points = 32768  
X\_Prescans = 4  
X\_Resolution = 0.96330739[Hz]  
X\_Sweep = 31.56565657[kHz]  
X\_Sweep\_Clipped = 25.25252525[kHz]  
Irr\_Domain = Proton  
Irr\_Freq = 399.78219838[MHz]  
Irr\_Offset = 5[ppm]  
Clipped = FALSE  
Scans = 531  
Total\_Scans = 531

Relaxation\_Delay = 2[s]  
Recvr Gain = 50  
Temp\_Get = 13.1[dC]  
X\_90\_Width = 8.8[us]  
X\_Acq\_Time = 1.03809024[s]  
X\_Angle = 30[deg]  
X\_Atn = 3.4[dB]  
X\_Pulse = 2.93333333[us]  
Irr\_Atn\_Dec = 23.66[dB]  
Irr\_Atn\_Dec\_Calc = 23.66[dB]  
Irr\_Atn\_Dec\_Default\_Calc = 23.66[dB]  
Irr\_Atn\_Noex = 23.66[dB]  
Irr\_Dec\_Bandwidth\_Hz = 4.7826087[kHz]  
Irr\_Dec\_Bandwidth\_Ppm = 11.96303566[ppm]  
Irr\_Dec\_Freq = 399.78219838[MHz]



---- PROCESSING PARAMETERS ----

```
sexp( 0.2[Hz], 0.0[s] )  
trapezoid( 0[%], 0[%], 80[%], 100[%] )  
zerofill( 1 )  
fft( 1, TRUE, TRUE )  
machinephase  
ppm
```

Derived from: LK-011702\_Proton-1-1.jdf

```
Filename           = LK-011702_Proton-1-3.  
Author             = delta  
Experiment         = proton.jxp  
Sample Id         = LK-011702  
Solvent           = CHLOROFORM-D  
Actual_Start_Time = 17-JAN-2017 17:53:21  
Revision_Time     = 4-AUG-2017 23:08:13
```

```
Comment           = single_pulse  
Data_Format       = 1D COMPLEX  
Dim_Size          = 13107  
Dim_Title         = Proton  
Dim_Units         = [ppm]  
Dimensions        = X  
Spectrometer      = JNM-ECZ400S/L1
```

```
Field_Strength    = 9.389766[T] (400[MHz])  
X_Acq_Duration    = 2.18628096[s]  
X_Domain          = 1H  
X_Freq            = 399.78219838[MHz]  
X_Offset          = 5[ppm]  
X_Points          = 16384  
X_Prescans        = 1  
X_Resolution      = 0.45739775[Hz]  
X_Sweep           = 7.4940048[kHz]  
X_Sweep_Clippped = 5.99520384[kHz]  
Irr_Domain        = Proton  
Irr_Freq          = 399.78219838[MHz]  
Irr_Offset        = 5[ppm]  
Tri_Domain        = Proton  
Tri_Freq          = 399.78219838[MHz]  
Tri_Offset        = 5[ppm]  
Clipped           = FALSE  
Scans             = 8  
Total_Scans       = 8
```

```
Relaxation_Delay  = 5[s]  
Recvr_Gain        = 56  
Temp_Get          = 24.1[dC]  
X_90_Width        = 9.5[us]  
X_Acq_Time        = 2.18628096[s]  
X_Angle           = 45[deg]  
X_Atn             = 2[dB]  
X_Pulse           = 4.75[us]  
Irr_Mode          = Off  
Tri_Mode          = Off  
Dante_Loop        = 500  
Dante_Presat      = FALSE
```

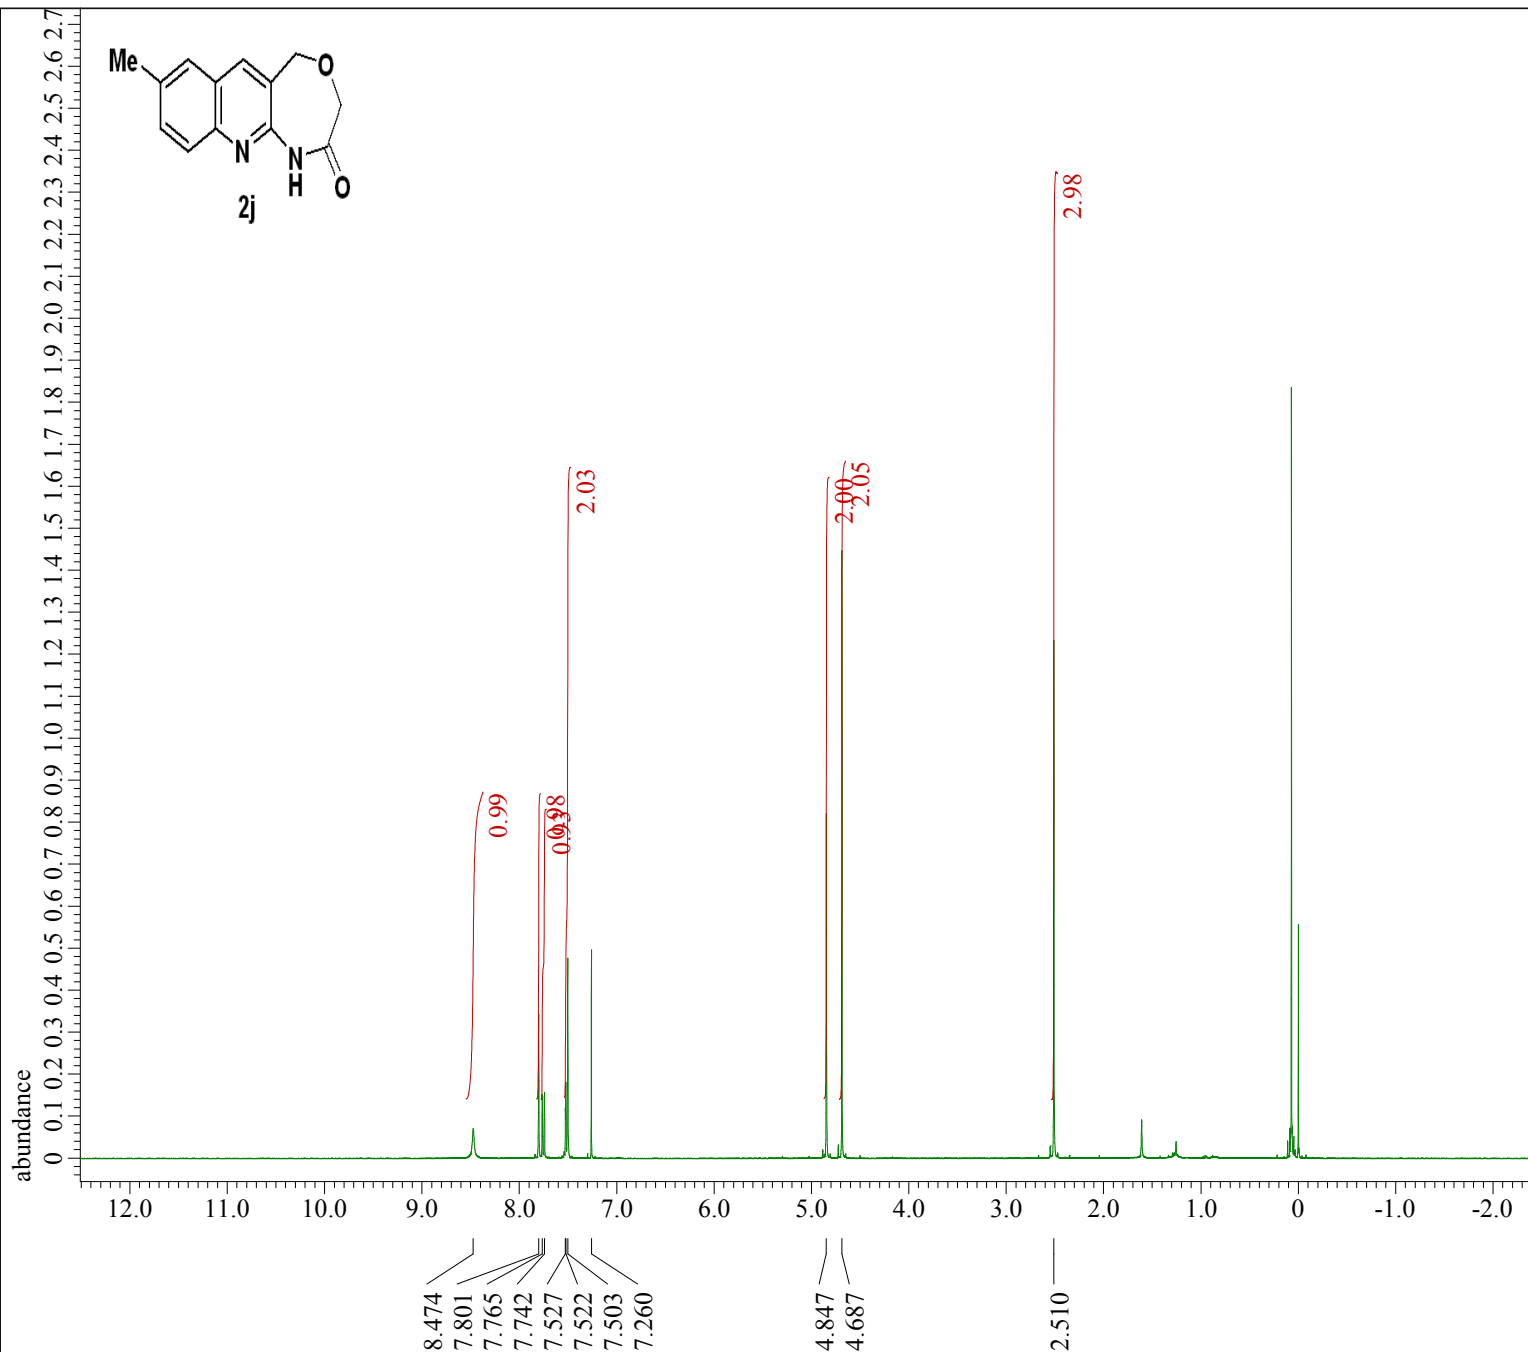

X : parts per Million : Proton



---- PROCESSING PARAMETERS ----

```
sexp( 2.0[Hz], 0.0[s] )
trapezoid( 0[%], 0[%], 80[%], 100[%] )
zerofill( 1 )
fft( 1, TRUE, TRUE )
machinephase
ppm
```

Derived from: LK-011702\_Carbon-1-1.jdf

```
Filename           = LK-011702_Carbon-1
Author             = delta
Experiment        = carbon.jxp
Sample_Id         = LK-011702
Solvent           = CHLOROFORM-D
Actual_Start_Time = 17-JAN-2017 23:54:
Revision_Time     = 4-AUG-2017 23:03:
```

```
Comment           = single pulse decou
Data_Format       = 1D COMPLEX
Dim_Size          = 26214
Dim_Title         = Carbon13
Dim_Units         = [ppm]
Dimensions        = X
Spectrometer      = JNM-ECZ400S/L1
```

```
Field_Strength    = 9.389766[T] (400[M]
X_Acq_Duration    = 1.03809024[s]
X_Domain          = 13C
X_Freq            = 100.52530333[MHz]
X_Offset          = 100[ppm]
X_Points          = 32768
X_Prescans        = 4
X_Resolution      = 0.96330739[Hz]
X_Sweep           = 31.56565657[kHz]
X_Sweep_Clipped  = 25.25252525[kHz]
Irr_Domain        = Proton
Irr_Freq          = 399.78219838[MHz]
Irr_Offset        = 5[ppm]
Clipped           = FALSE
Scans             = 2400
Total_Scans       = 2400
```

```
Relaxation_Delay  = 2[s]
Recvr Gain        = 50
Temp_Get          = 18.9[dC]
X_90_Width        = 8.8[us]
X_Acq_Time        = 1.03809024[s]
X_Angle           = 30[deg]
X_Atn             = 3.4[dB]
X_Pulse           = 2.93333333[us]
Irr_Atn_Dec       = 23.66[dB]
Irr_Atn_Dec_Calc = 23.66[dB]
Irr_Atn_Dec_Default_Calc = 23.66[dB]
Irr_Atn_Noise    = 23.66[dB]
Irr_Dec_Bandwidth_Hz = 4.7826087[kHz]
Irr_Dec_Bandwidth_Ppm = 11.96303566[ppm]
Irr_Dec_Freq      = 399.78219838[MHz]
```

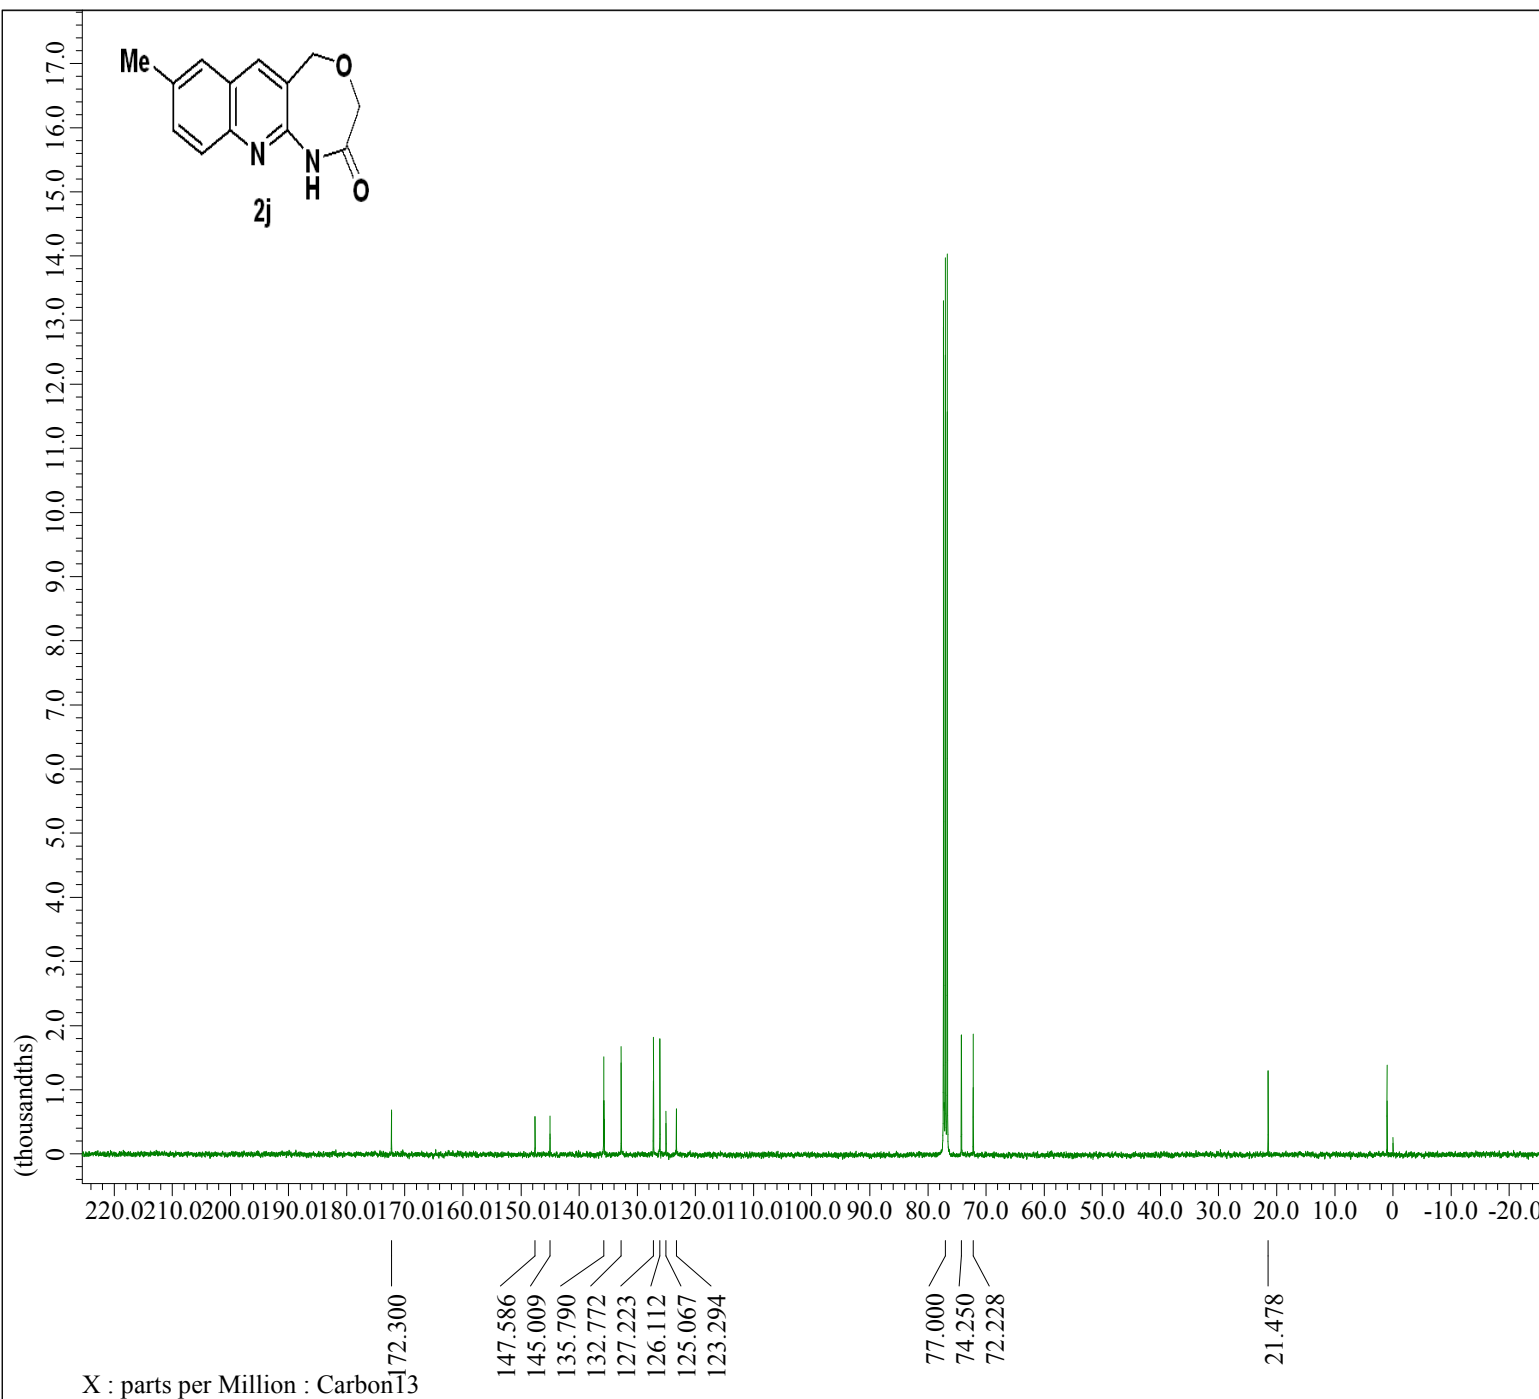

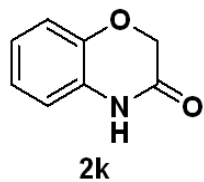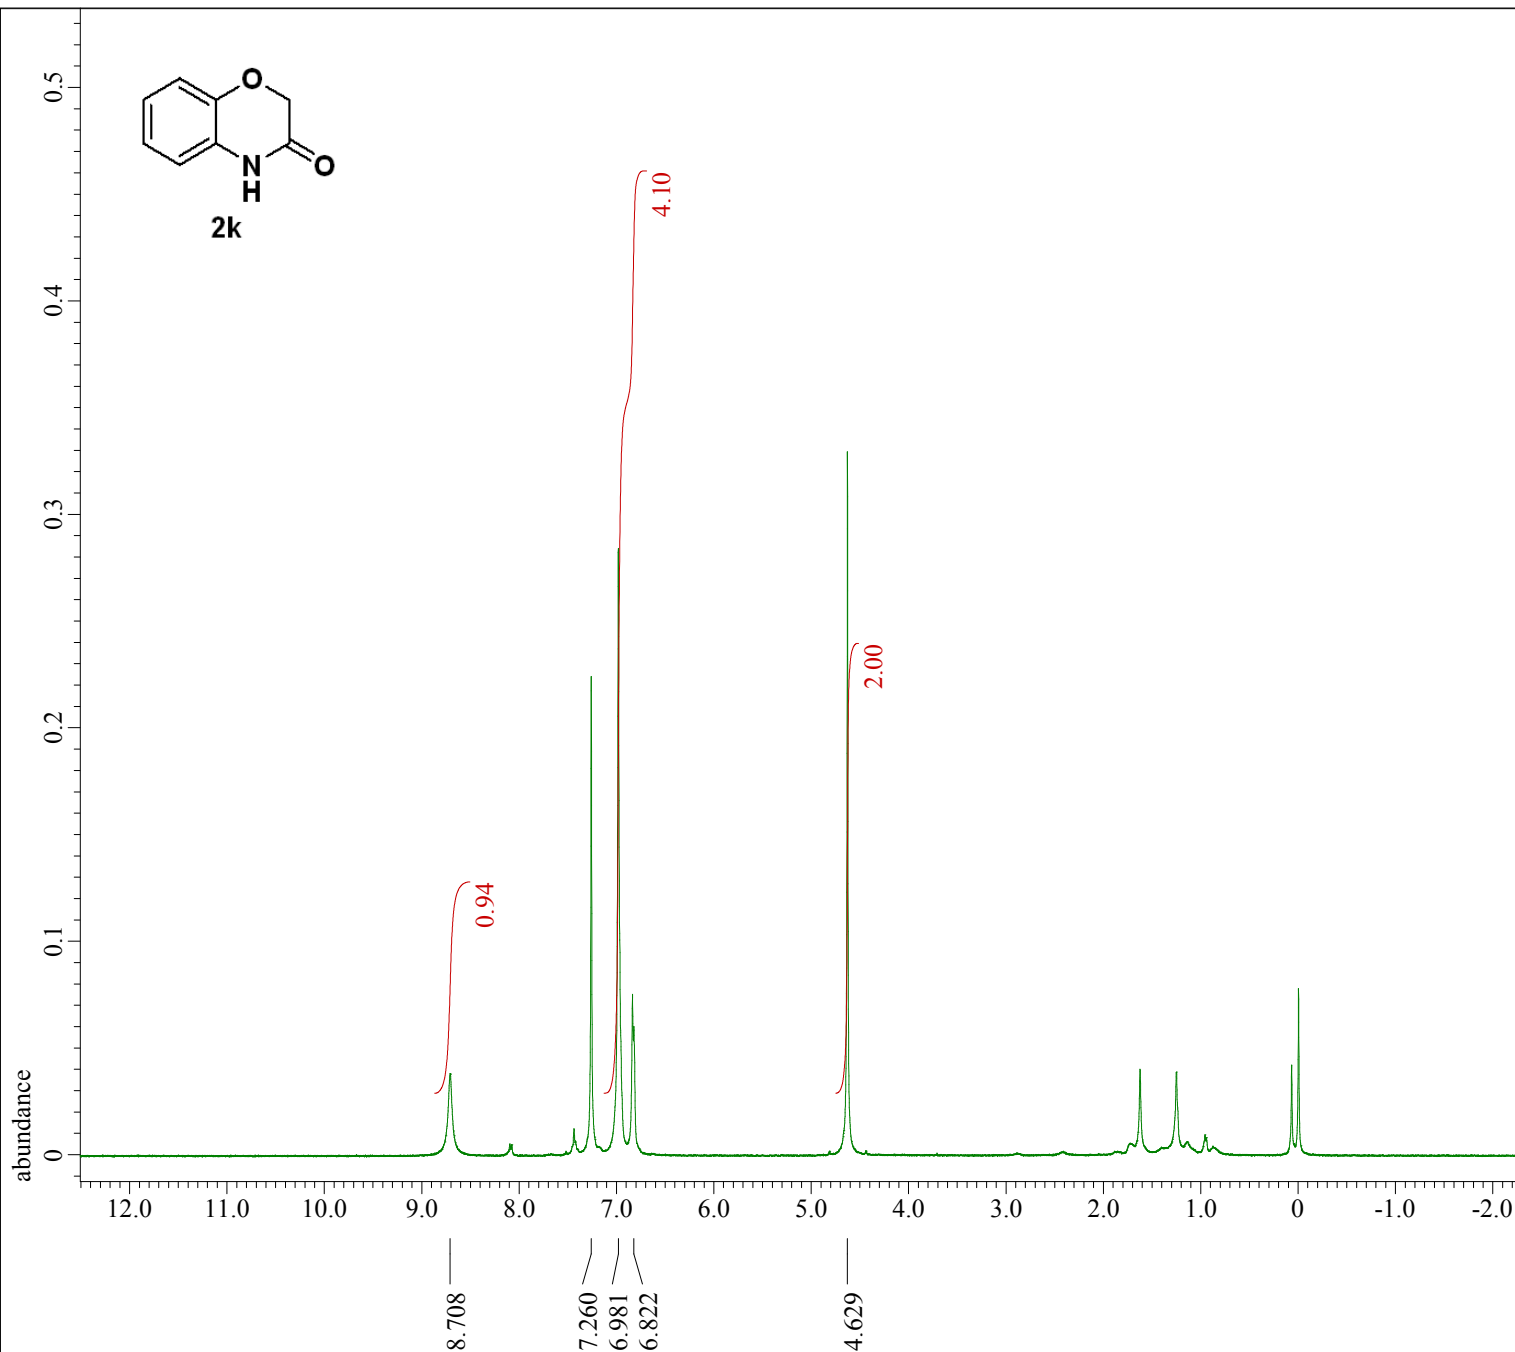

X : parts per Million : Proton

---- PROCESSING PARAMETERS ----  
sexf( 0.2[Hz], 0.0[s] )  
trapezoid( 0[%], 0[%], 80[%], 100[%] )  
zerofill( 1 )  
fft( 1, TRUE, TRUE )  
machinephase  
ppm

Derived from: LK031404\_Proton-1-1.jdf

Filename = LK031404\_Proton-1-3.j  
Author = delta  
Experiment = proton.jxp  
Sample Id = LK031404  
Solvent = CHLOROFORM-D  
Actual\_Start\_Time = 14-MAR-2017 15:57:53  
Revision\_Time = 4-AUG-2017 23:19:24

Comment = single\_pulse  
Data\_Format = 1D COMPLEX  
Dim\_Size = 13107  
Dim\_Title = Proton  
Dim\_Units = [ppm]  
Dimensions = X  
Spectrometer = JNM-ECZ400S/L1

Field\_Strength = 9.389766[T] (400[MHz])  
X\_Acq\_Duration = 2.18628096[s]  
X\_Domain = 1H  
X\_Freq = 399.78219838[MHz]  
X\_Offset = 5[ppm]  
X\_Points = 16384  
X\_Prescans = 1  
X\_Resolution = 0.45739775[Hz]  
X\_Sweep = 7.4940048[kHz]  
X\_Sweep\_Clippped = 5.99520384[kHz]  
Irr\_Domain = Proton  
Irr\_Freq = 399.78219838[MHz]  
Irr\_Offset = 5[ppm]  
Tri\_Domain = Proton  
Tri\_Freq = 399.78219838[MHz]  
Tri\_Offset = 5[ppm]  
Clipped = FALSE  
Scans = 8  
Total\_Scans = 8

Relaxation\_Delay = 5[s]  
Recvr\_Gain = 56  
Temp\_Get = 15.2[dC]  
X\_90\_Width = 9.5[us]  
X\_Acq\_Time = 2.18628096[s]  
X\_Angle = 45[deg]  
X\_Atn = 2[dB]  
X\_Pulse = 4.75[us]  
Irr\_Mode = Off  
Tri\_Mode = Off  
Dante\_Loop = 500  
Dante\_Presat = FALSE



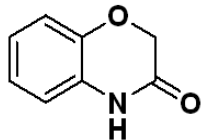

2k

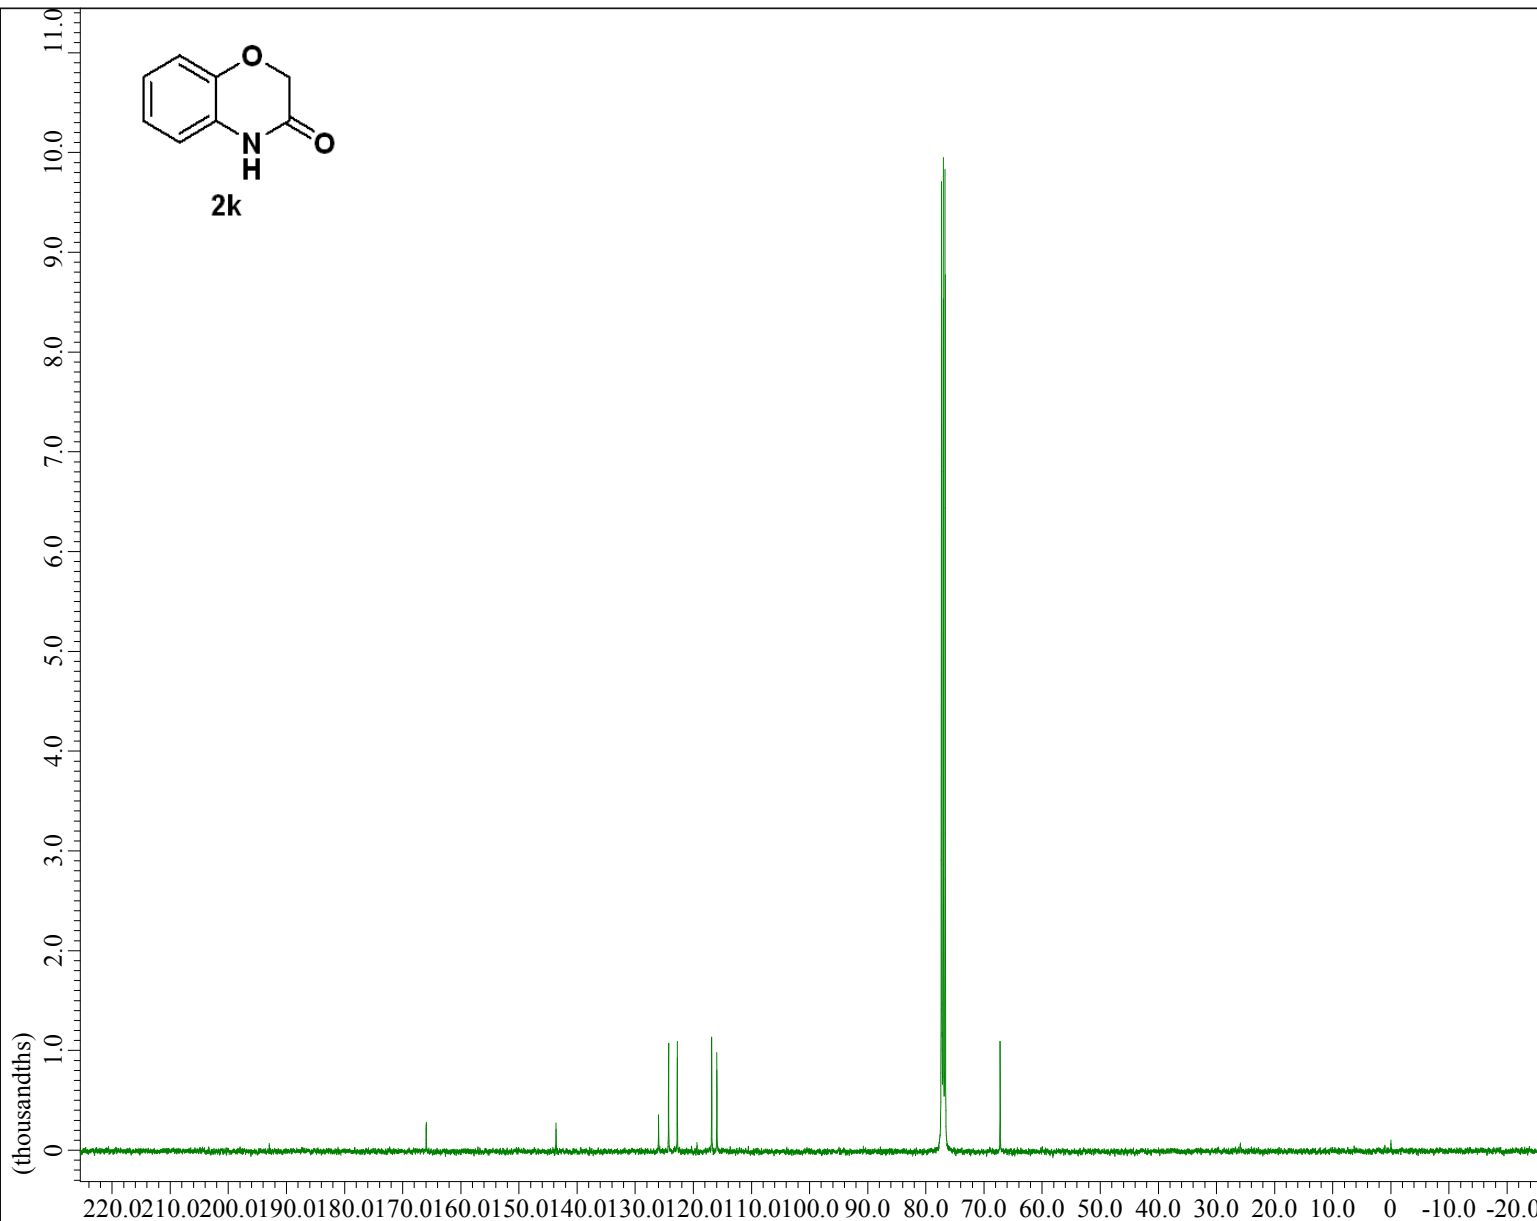

X : parts per Million : Carbon13



---- PROCESSING PARAMETERS ----

```

sexp( 2.0[Hz], 0.0[s] )
trapezoid( 0[%], 0[%], 80[%], 100[%] )
zerofill( 1 )
fft( 1, TRUE, TRUE )
machinephase
ppm
  
```

Derived from: LK031404\_Carbon-1-1.jdf

```

Filename           = LK031404_Carbon-1-
Author             = delta
Experiment         = carbon.jxp
Sample_Id          = LK031404
Solvent            = CHLOROFORM-D
Actual_Start_Time  = 14-MAR-2017 19:30:
Revision_Time      = 4-AUG-2017 23:20:
  
```

```

Comment           = single pulse decou
Data_Format       = 1D COMPLEX
Dim_Size          = 26214
Dim_Title         = Carbon13
Dim_Units         = [ppm]
Dimensions        = X
Spectrometer      = JNM-ECZ400S/L1
  
```

```

Field_Strength    = 9.389766[T] (400[M
X_Acq_Duration    = 1.03809024[s]
X_Domain          = 13C
X_Freq            = 100.52530333[MHz]
X_Offset          = 100[ppm]
X_Points          = 32768
X_Prescans        = 4
X_Resolution      = 0.96330739[Hz]
X_Sweep           = 31.56565657[kHz]
X_Sweep_Clipped   = 25.25252525[kHz]
Irr_Domain        = Proton
Irr_Freq          = 399.78219838[MHz]
Irr_Offset        = 5[ppm]
Clipped           = FALSE
Scans             = 4800
Total_Scans       = 4800
  
```

```

Relaxation_Delay  = 2[s]
Recvr Gain        = 50
Temp_Get          = 13.2[dC]
X_90_Width        = 8.8[us]
X_Acq_Time        = 1.03809024[s]
X_Angle           = 30[deg]
X_Atn             = 3.4[dB]
X_Pulse           = 2.93333333[us]
Irr_Atn_Dec       = 23.66[dB]
Irr_Atn_Dec_Calc  = 23.66[dB]
Irr_Atn_Dec_Default_Calc = 23.66[dB]
Irr_Atn_Noise    = 23.66[dB]
Irr_Dec_Bandwidth_Hz = 4.7826087[kHz]
Irr_Dec_Bandwidth_Ppm = 11.96303566[ppm]
Irr_Dec_Freq      = 399.78219838[MHz]
  
```

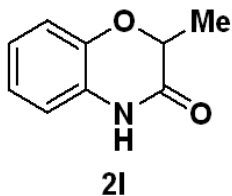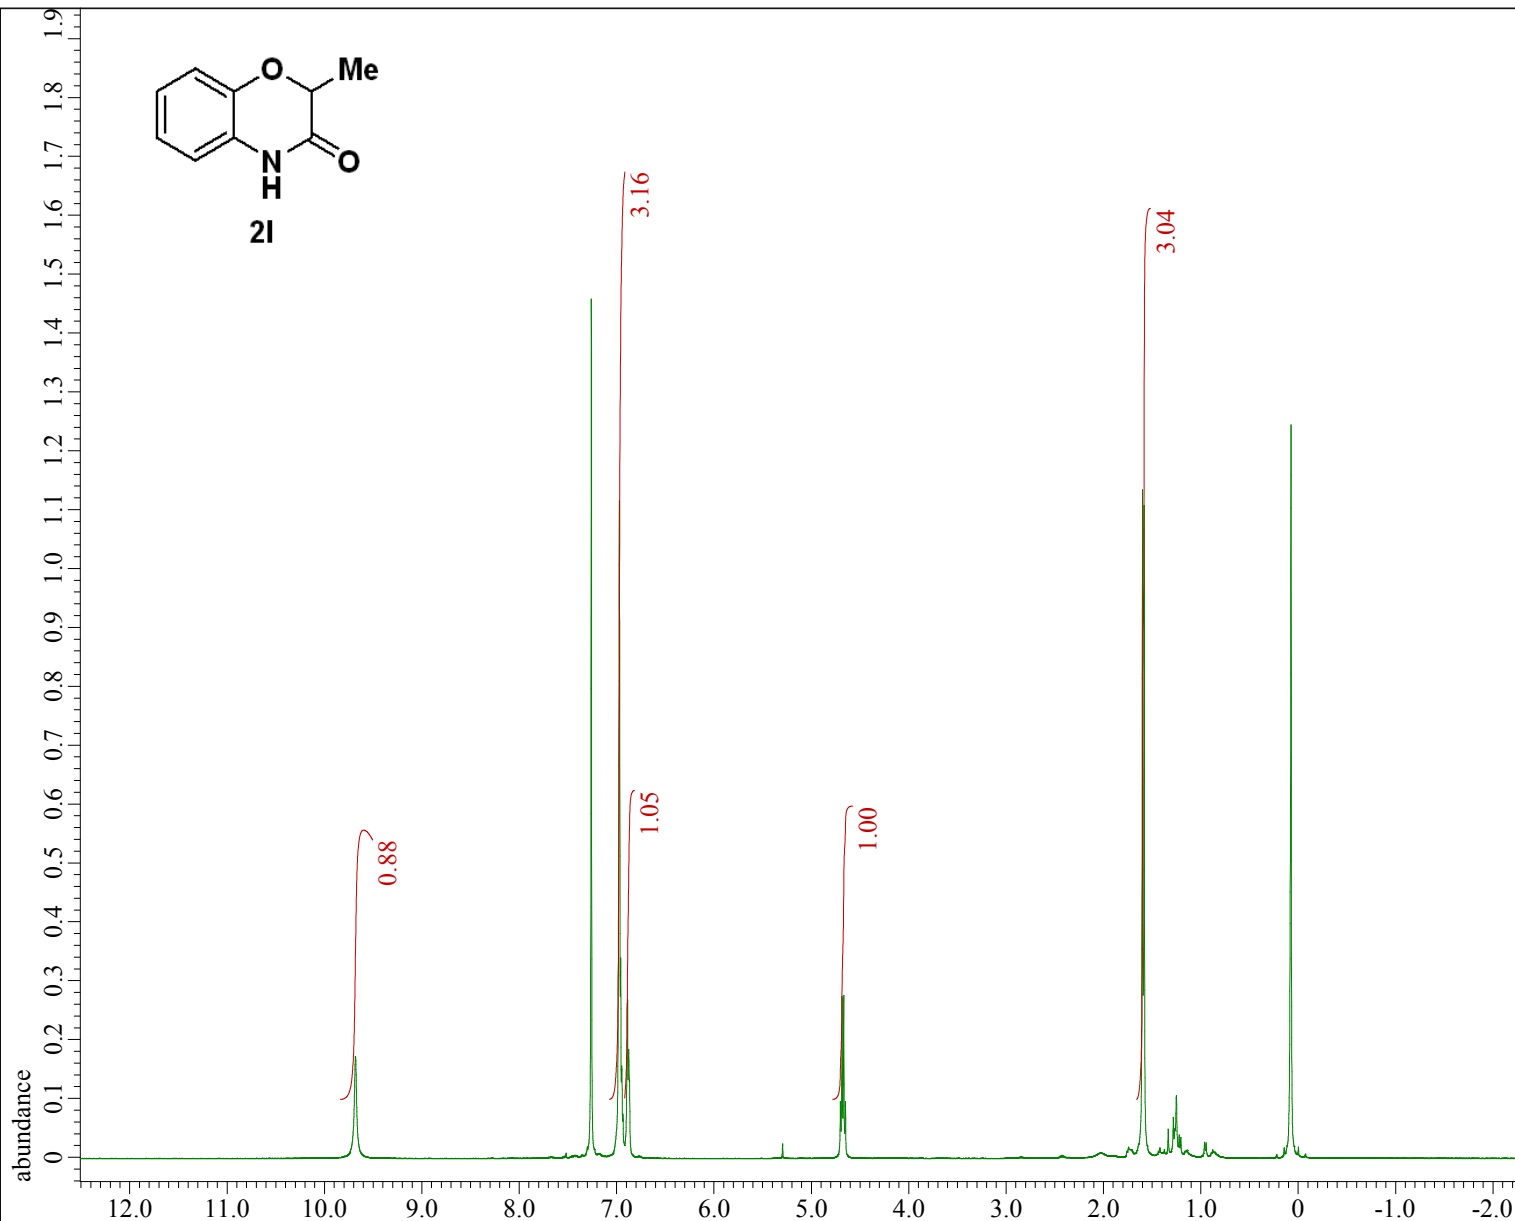

X : parts per Million : Proton

---- PROCESSING PARAMETERS ----  
sexp( 0.2[Hz], 0.0[s] )  
trapezoid( 0[%], 0[%], 80[%], 100[%] )  
zerofill( 1 )  
fft( 1, TRUE, TRUE )  
machinephase  
ppm

Derived from: LK-1027-PRODUCT\_Proton-1-1.jdf

Filename = LK-1027-PRODUCT\_Proton-1-1.jdf  
Author = delta  
Experiment = proton.jxp  
Sample Id = LK-1027-PRODUCT  
Solvent = CHLOROFORM-D  
Actual\_Start\_Time = 1-NOV-2016 14:43:21  
Revision\_Time = 4-AUG-2017 23:28:06

Comment = single\_pulse  
Data\_Format = 1D\_COMPLEX  
Dim\_Size = 13107  
Dim\_Title = Proton  
Dim\_Units = [ppm]  
Dimensions = X  
Spectrometer = JNM-ECZ400S/L1

Field\_Strength = 9.389766[T] (400[MHz])  
X\_Acq\_Duration = 2.18628096[s]  
X\_Domain = 1H  
X\_Freq = 399.78219838[MHz]  
X\_Offset = 5[ppm]  
X\_Points = 16384  
X\_Prescans = 1  
X\_Resolution = 0.45739775[Hz]  
X\_Sweep = 7.4940048[kHz]  
X\_Sweep\_Clipped = 5.99520384[kHz]  
Irr\_Domain = Proton  
Irr\_Freq = 399.78219838[MHz]  
Irr\_Offset = 5[ppm]  
Tri\_Domain = Proton  
Tri\_Freq = 399.78219838[MHz]  
Tri\_Offset = 5[ppm]  
Clipped = FALSE  
Scans = 8  
Total\_Scans = 8

Relaxation\_Delay = 5[s]  
Recvr\_Gain = 46  
Temp\_Get = 14.3[dC]  
X\_90\_Width = 9.5[us]  
X\_Acq\_Time = 2.18628096[s]  
X\_Angle = 45[deg]  
X\_Atn = 2[dB]  
X\_Pulse = 4.75[us]  
Irr\_Mode = Off  
Tri\_Mode = Off  
Dante\_Loop = 500  
Dante\_Presat = FALSE



---- PROCESSING PARAMETERS ----

```
sexp( 2.0[Hz], 0.0[s] )
trapezoid( 0[%], 0[%], 80[%], 100[%] )
zerofill( 1 )
fft( 1, TRUE, TRUE )
machinephase
ppm
```

Derived from: LK-1027-PRODUCT\_Carbon-1-1.jdf

```
Filename      = LK-1027-PRODUCT_Ca
Author       = delta
Experiment   = carbon.jxp
Sample Id    = LK-1027-PRODUCT
Solvent      = CHLOROFORM-D
Actual_Start_Time = 1-NOV-2016 14:51:
Revision_Time   = 4-AUG-2017 23:23:
```

```
Comment      = single pulse decou
Data_Format  = 1D COMPLEX
Dim Size     = 26214
Dim Title    = Carbon13
Dim Units    = [ppm]
Dimensions   = X
Spectrometer = JNM-ECZ400S/L1
```

```
Field_Strength = 9.389766[T] (400[M]
X_Acq_Duration = 1.03809024[s]
X_Domain       = 13C
X_Freq         = 100.52530333[MHz]
X_Offset       = 100[ppm]
X_Points       = 32768
X_Prescans     = 4
X_Resolution   = 0.96330739[Hz]
X_Sweep        = 31.56565657[kHz]
X_Sweep_Clippped = 25.25252525[kHz]
Irr_Domain     = Proton
Irr_Freq       = 399.78219838[MHz]
Irr_Offset     = 5[ppm]
Clipped        = FALSE
Scans          = 406.0
Total_Scans    = 406.0
```

```
Relaxation_Delay = 2[s]
Recvr Gain       = 50
Temp_Get         = 14.8[dC]
X_90_Width       = 8.8[us]
X_Acq_Time       = 1.03809024[s]
X_Angle          = 30[deg]
X_Atn            = 3.4[dB]
X_Pulse          = 2.93333333[us]
Irr_Atn_Dec      = 23.66[dB]
Irr_Atn_Dec_Calc = 23.66[dB]
Irr_Atn_Dec_Default_Calc = 23.66[dB]
Irr_Atn_No     = 23.66[dB]
Irr_Dec_Bandwidth_Hz = 4.7826087[kHz]
Irr_Dec_Bandwidth_Ppm = 11.96303566[ppm]
Irr_Dec_Freq     = 399.78219838[MHz]
```

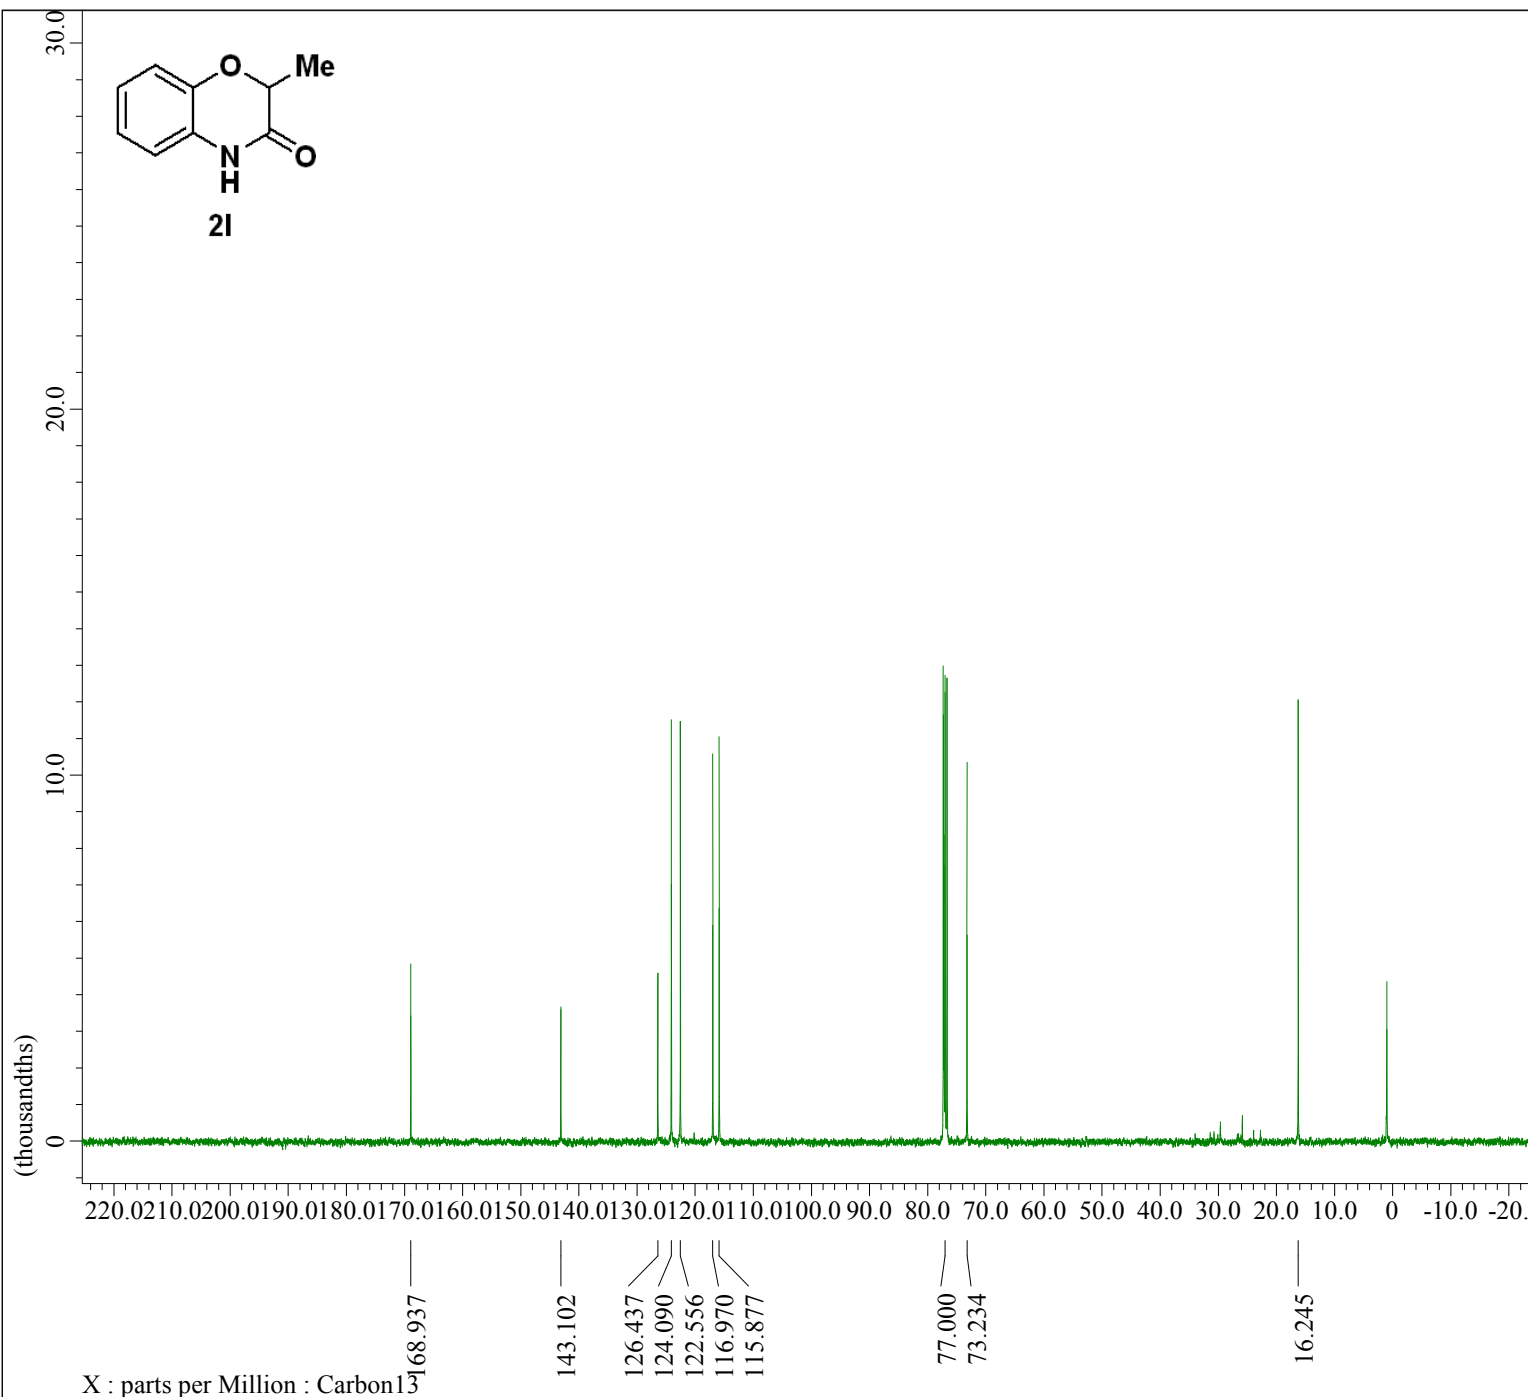

X : parts per Million : Carbon13

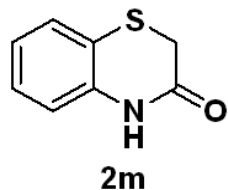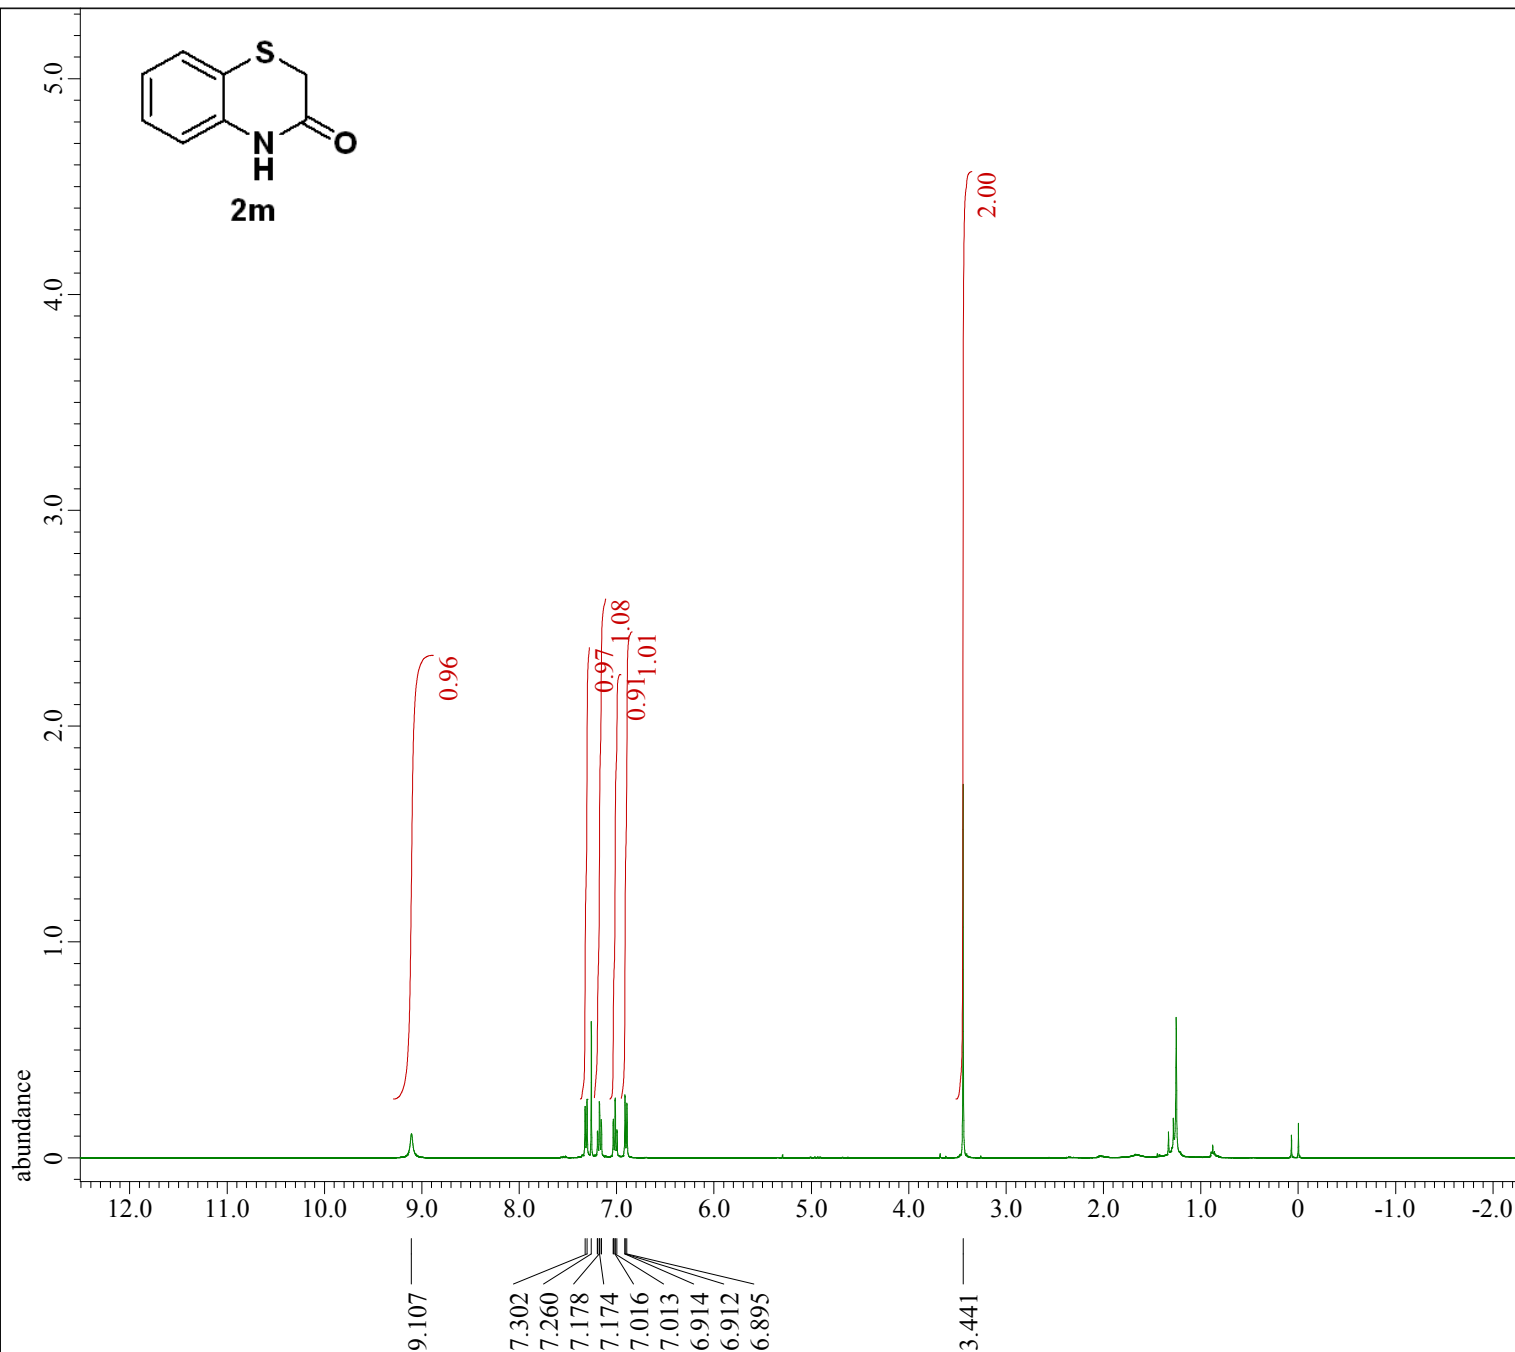

X : parts per Million : Proton

---- PROCESSING PARAMETERS ----  
sexp( 0.2[Hz], 0.0[s] )  
trapezoid( 0[%], 0[%], 80[%], 100[%] )  
zerofill( 1 )  
fft( 1, TRUE, TRUE )  
machinephase  
ppm

Derived from: LK0224-1\_Proton-1-1.jdf

Filename = LK0224-1\_Proton-1-3.j  
Author = delta  
Experiment = proton.jxp  
Sample Id = LK0224-1  
Solvent = CHLOROFORM-D  
Actual\_Start\_Time = 24-FEB-2017 17:15:06  
Revision\_Time = 4-AUG-2017 23:34:00

Comment = single\_pulse  
Data\_Format = 1D COMPLEX  
Dim\_Size = 13107  
Dim\_Title = Proton  
Dim\_Units = [ppm]  
Dimensions = X  
Spectrometer = JNM-ECZ400S/L1

Field\_Strength = 9.389766[T] (400[MHz])  
X\_Acq\_Duration = 2.18628096[s]  
X\_Domain = 1H  
X\_Freq = 399.78219838[MHz]  
X\_Offset = 5[ppm]  
X\_Points = 16384  
X\_Prescans = 1  
X\_Resolution = 0.45739775[Hz]  
X\_Sweep = 7.4940048[kHz]  
X\_Sweep\_Clippped = 5.99520384[kHz]  
Irr\_Domain = Proton  
Irr\_Freq = 399.78219838[MHz]  
Irr\_Offset = 5[ppm]  
Tri\_Domain = Proton  
Tri\_Freq = 399.78219838[MHz]  
Tri\_Offset = 5[ppm]  
Clipped = FALSE  
Scans = 8  
Total\_Scans = 8

Relaxation\_Delay = 5[s]  
Recvr\_Gain = 56  
Temp\_Get = 22[dC]  
X\_90\_Width = 9.5[us]  
X\_Acq\_Time = 2.18628096[s]  
X\_Angle = 45[deg]  
X\_Atn = 2[dB]  
X\_Pulse = 4.75[us]  
Irr\_Mode = Off  
Tri\_Mode = Off  
Dante\_Loop = 500  
Dante\_Presat = FALSE



---- PROCESSING PARAMETERS ----

```
sexp( 2.0[Hz], 0.0[s] )
trapezoid( 0[%], 0[%], 80[%], 100[%] )
zerofill( 1 )
fft( 1, TRUE, TRUE )
machinephase
ppm
```

Derived from: LK0224-1\_Carbon-1-1.jdf

```
Filename           = LK0224-1_Carbon-1-
Author             = delta
Experiment         = carbon.jxp
Sample_Id         = LK0224-1
Solvent           = CHLOROFORM-D
Actual_Start_Time  = 24-FEB-2017 17:25:
Revision_Time     = 4-AUG-2017 23:38:
```

```
Comment           = single pulse decou
Data_Format       = 1D COMPLEX
Dim_Size          = 26214
Dim_Title         = Carbon13
Dim_Units         = [ppm]
Dimensions        = X
Spectrometer      = JNM-ECZ400S/L1
```

```
Field_Strength    = 9.389766[T] (400[M
X_Acq_Duration    = 1.03809024[s]
X_Domain          = 13C
X_Freq            = 100.52530333[MHz]
X_Offset          = 100[ppm]
X_Points          = 32768
X_Prescans        = 4
X_Resolution      = 0.96330739[Hz]
X_Sweep           = 31.56565657[kHz]
X_Sweep_Clipped   = 25.25252525[kHz]
Irr_Domain        = Proton
Irr_Freq          = 399.78219838[MHz]
Irr_Offset        = 5[ppm]
Clipped           = FALSE
Scans             = 183
Total_Scans       = 183
```

```
Relaxation_Delay  = 2[s]
Recvr_Gain        = 50
Temp_Get          = 21.9[dC]
X_90_Width        = 8.8[us]
X_Acq_Time        = 1.03809024[s]
X_Angle           = 30[deg]
X_Atn             = 3.4[dB]
X_Pulse           = 2.93333333[us]
Irr_Atn_Dec       = 23.66[dB]
Irr_Atn_Dec_Calc  = 23.66[dB]
Irr_Atn_Dec_Default_Calc = 23.66[dB]
Irr_Atn_Noise    = 23.66[dB]
Irr_Dec_Bandwidth_Hz = 4.7826087[kHz]
Irr_Dec_Bandwidth_Ppm = 11.96303566[ppm]
Irr_Dec_Freq      = 399.78219838[MHz]
```

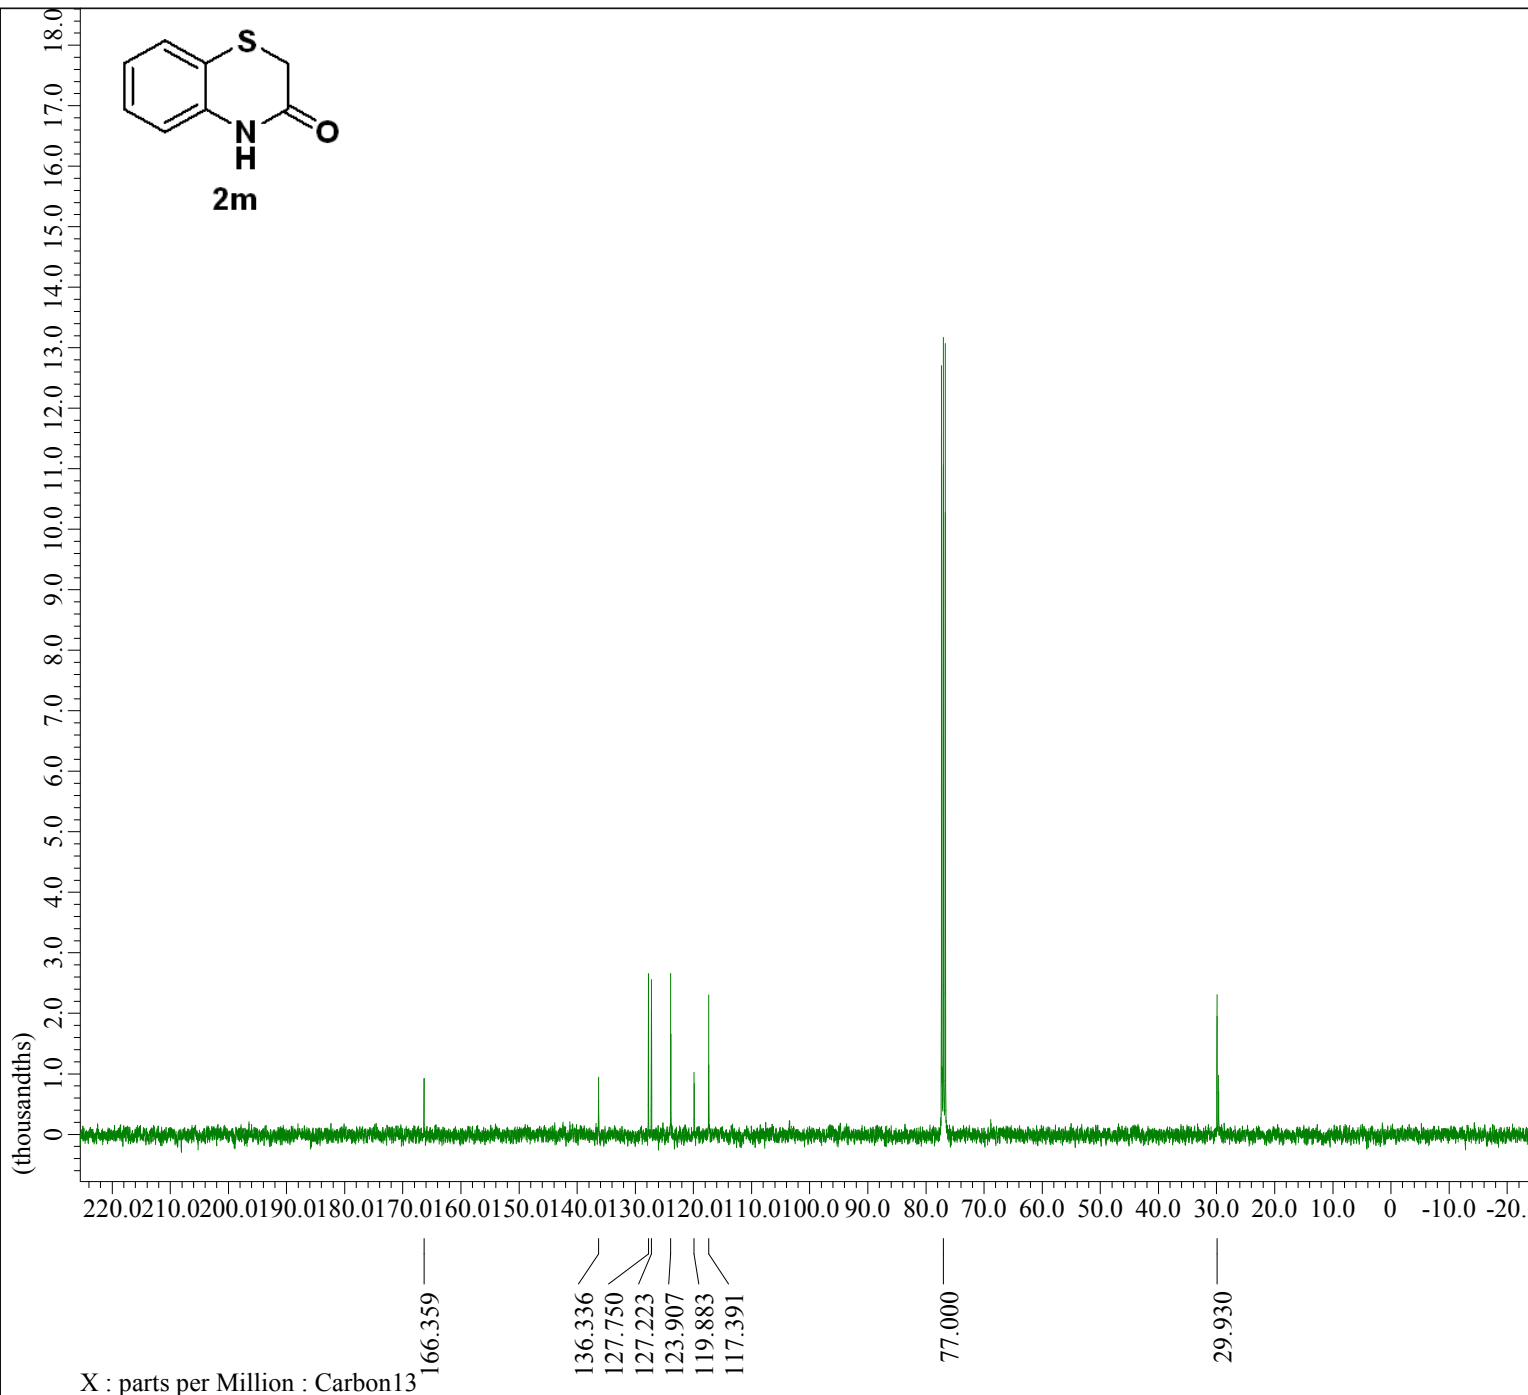

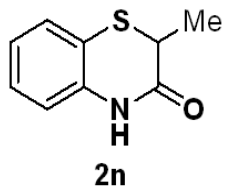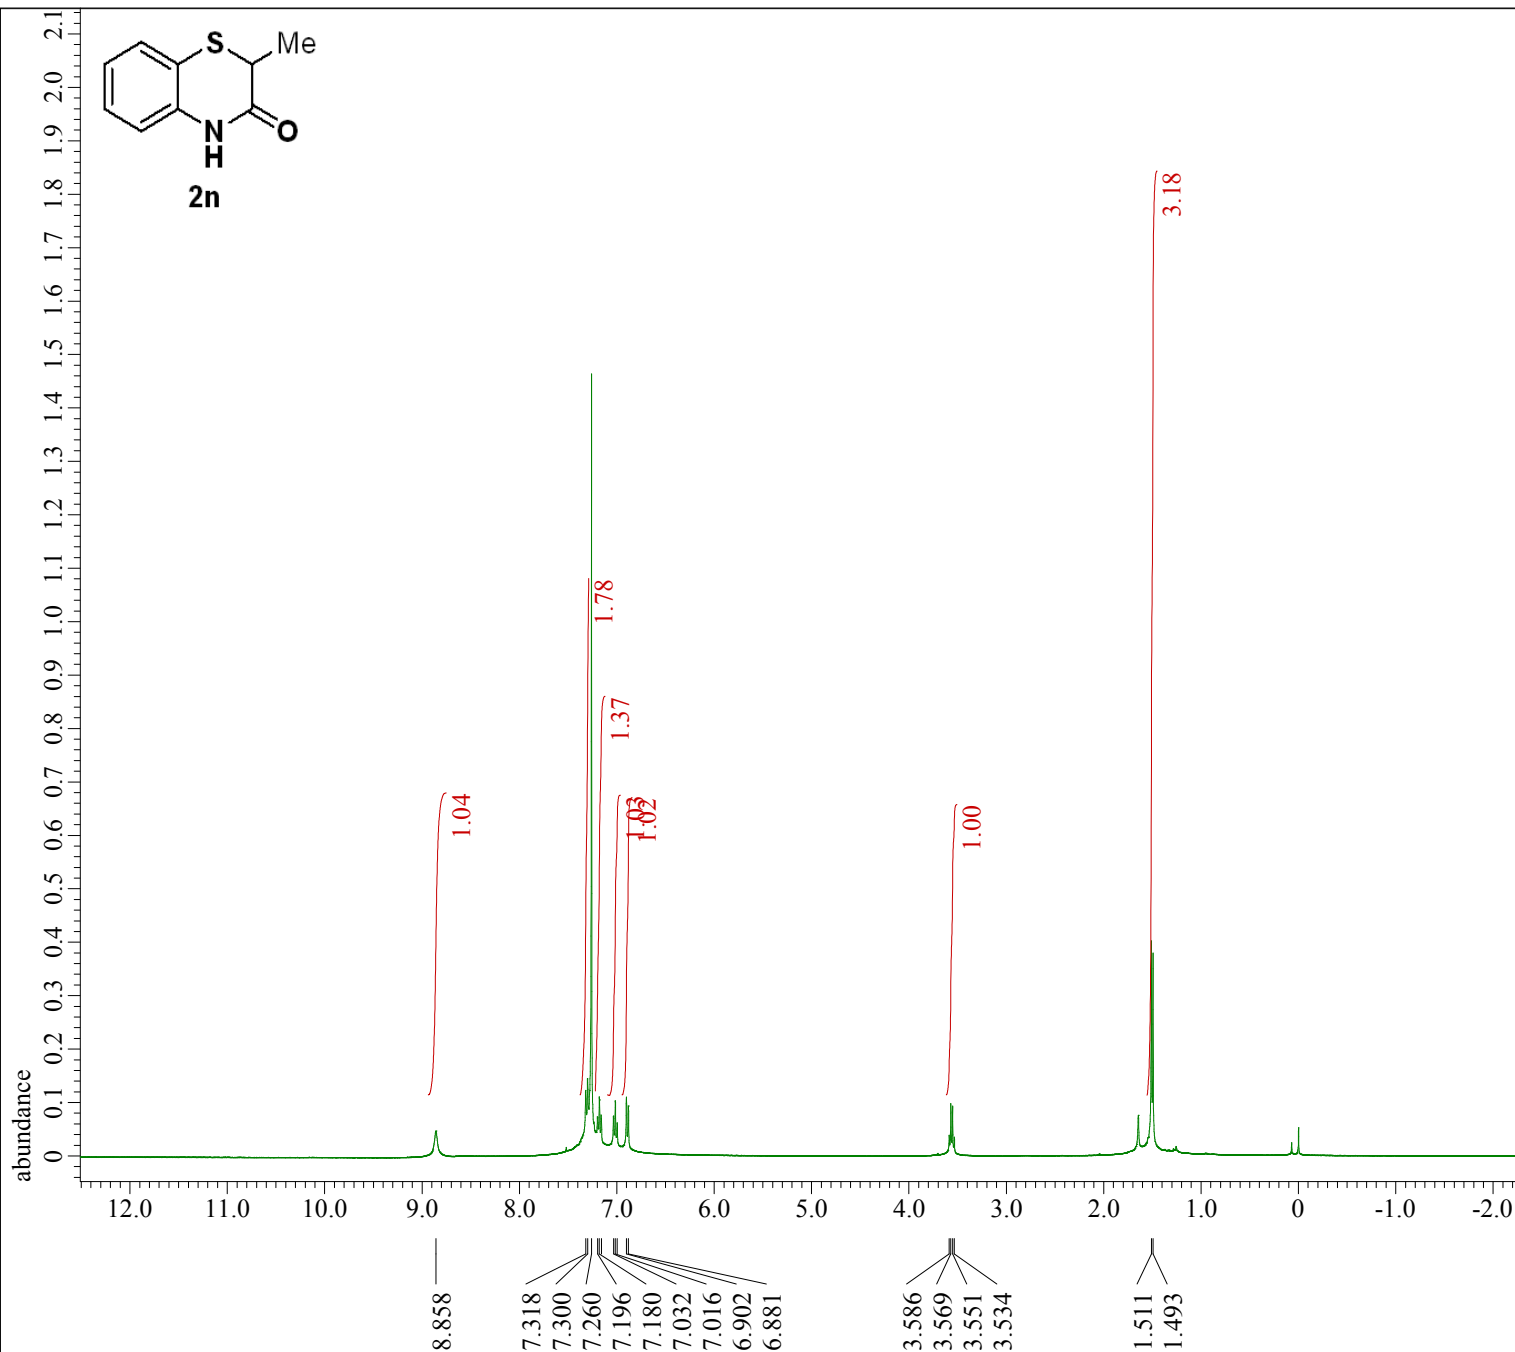

X : parts per Million : Proton

---- PROCESSING PARAMETERS ----  
sexp( 0.2[Hz], 0.0[s] )  
trapezoid( 0[%], 0[%], 80[%], 100[%] )  
zerofill( 1 )  
fft( 1, TRUE, TRUE )  
machinephase  
ppm

Derived from: LK050702\_Proton-1-1.jdf

Filename = LK050702\_Proton-1-4.j  
Author = delta  
Experiment = proton.jxp  
Sample Id = LK050702  
Solvent = CHLOROFORM-D  
Actual\_Start\_Time = 7-MAY-2017 17:24:59  
Revision\_Time = 5-AUG-2017 01:12:25

Comment = single\_pulse  
Data\_Format = 1D COMPLEX  
Dim\_Size = 13107  
Dim\_Title = Proton  
Dim\_Units = [ppm]  
Dimensions = X  
Spectrometer = JNM-ECZ400S/L1

Field\_Strength = 9.389766[T] (400[MHz])  
X\_Acq\_Duration = 2.18628096[s]  
X\_Domain = 1H  
X\_Freq = 399.78219838[MHz]  
X\_Offset = 5[ppm]  
X\_Points = 16384  
X\_Prescans = 1  
X\_Resolution = 0.45739775[Hz]  
X\_Sweep = 7.4940048[kHz]  
X\_Sweep\_Clippped = 5.99520384[kHz]  
Irr\_Domain = Proton  
Irr\_Freq = 399.78219838[MHz]  
Irr\_Offset = 5[ppm]  
Tri\_Domain = Proton  
Tri\_Freq = 399.78219838[MHz]  
Tri\_Offset = 5[ppm]  
Clipped = FALSE  
Scans = 8  
Total\_Scans = 8

Relaxation\_Delay = 5[s]  
Recvr\_Gain = 56  
Temp\_Get = 22.2[dC]  
X\_90\_Width = 9.5[us]  
X\_Acq\_Time = 2.18628096[s]  
X\_Angle = 45[deg]  
X\_Atn = 2[dB]  
X\_Pulse = 4.75[us]  
Irr\_Mode = Off  
Tri\_Mode = Off  
Dante\_Loop = 500  
Dante\_Presat = FALSE



---- PROCESSING PARAMETERS ----

```
sexp( 2.0[Hz], 0.0[s] )
trapezoid( 0[%], 0[%], 80[%], 100[%] )
zerofill( 1 )
fft( 1, TRUE, TRUE )
machinephase
ppm
```

Derived from: LK050702\_Carbon-1-1.jdf

```
Filename           = LK050702_Carbon-1-
Author             = delta
Experiment         = carbon.jxp
Sample_Id         = LK050702
Solvent           = CHLOROFORM-D
Actual_Start_Time = 7-MAY-2017 18:25:
Revision_Time     = 5-AUG-2017 01:17:
```

```
Comment           = single pulse decou
Data_Format       = 1D COMPLEX
Dim_Size          = 26214
Dim_Title         = Carbon13
Dim_Units         = [ppm]
Dimensions        = X
Spectrometer      = JNM-ECZ400S/L1
```

```
Field_Strength    = 9.389766[T] (400[M
X_Acq_Duration    = 1.03809024[s]
X_Domain          = 13C
X_Freq            = 100.52530333[MHz]
X_Offset          = 100[ppm]
X_Points          = 32768
X_Prescans        = 4
X_Resolution      = 0.96330739[Hz]
X_Sweep           = 31.56565657[kHz]
X_Sweep_Clipped  = 25.25252525[kHz]
Irr_Domain        = Proton
Irr_Freq          = 399.78219838[MHz]
Irr_Offset        = 5[ppm]
Clipped           = FALSE
Scans             = 8000
Total_Scans       = 8000
```

```
Relaxation_Delay  = 2[s]
Recvr Gain        = 50
Temp_Get          = 23[dC]
X_90_Width        = 8.8[us]
X_Acq_Time        = 1.03809024[s]
X_Angle           = 30[deg]
X_Atn             = 3.4[dB]
X_Pulse          = 2.93333333[us]
Irr_Atn_Dec       = 23.66[dB]
Irr_Atn_Dec_Calc = 23.66[dB]
Irr_Atn_Dec_Default_Calc = 23.66[dB]
Irr_Atn_Noise    = 23.66[dB]
Irr_Dec_Bandwidth_Hz = 4.7826087[kHz]
Irr_Dec_Bandwidth_Ppm = 11.96303566[ppm]
Irr_Dec_Freq      = 399.78219838[MHz]
```

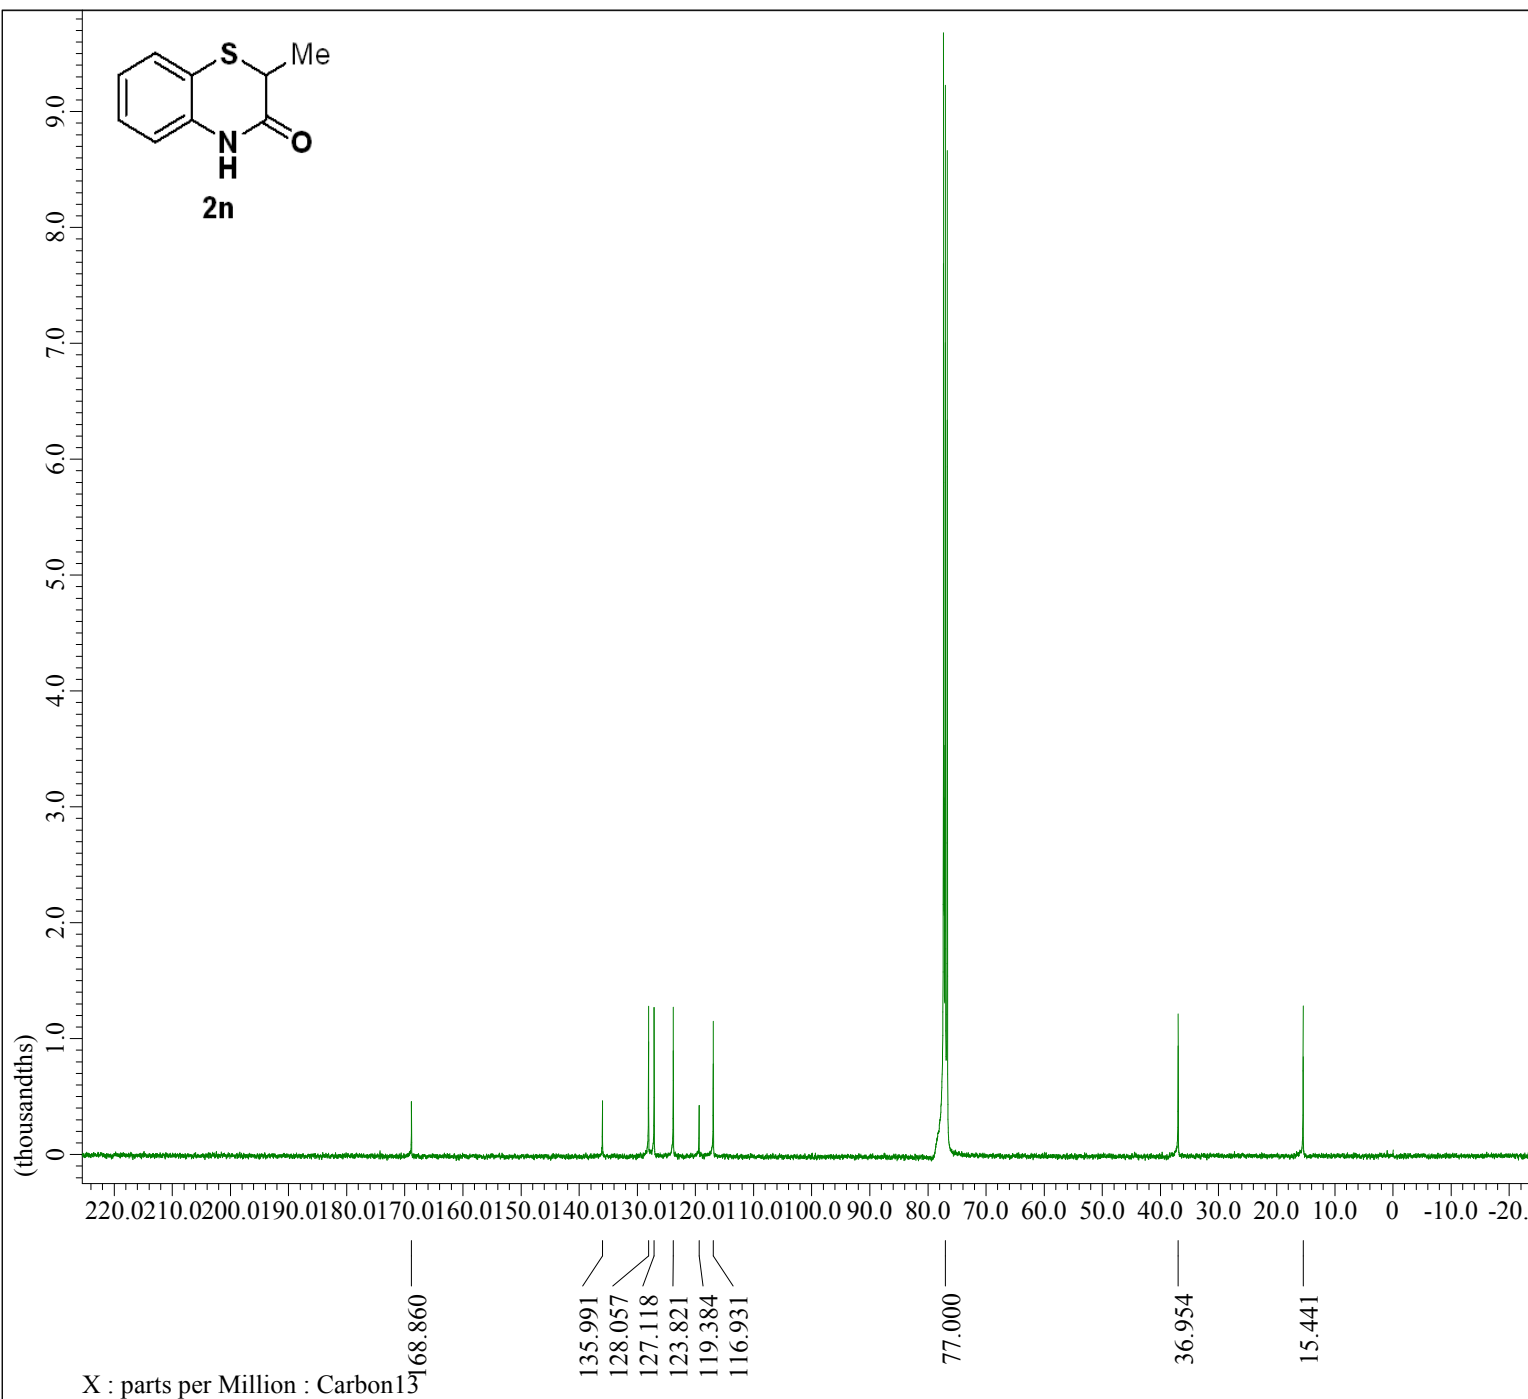

X : parts per Million : Carbon13



---- PROCESSING PARAMETERS ----  
sexp( 0.2[Hz], 0.0[s] )  
trapezoid( 0[%], 0[%], 80[%], 100[%] )  
zerofill( 1 )  
fft( 1, TRUE, TRUE )  
machinephase  
ppm

Derived from: LK120904\_Proton-1-1.jdf

Filename = LK120904\_Proton-1-3.j  
Author = delta  
Experiment = proton.jxp  
Sample Id = LK120904  
Solvent = CHLOROFORM-D  
Actual\_Start\_Time = 14-DEC-2016 11:52:16  
Revision\_Time = 4-AUG-2017 23:45:21

Comment = single\_pulse  
Data\_Format = 1D COMPLEX  
Dim\_Size = 13107  
Dim\_Title = Proton  
Dim\_Units = [ppm]  
Dimensions = X  
Spectrometer = JNM-ECZ400S/L1

Field\_Strength = 9.389766[T] (400[MHz])  
X\_Acq\_Duration = 2.18628096[s]  
X\_Domain = 1H  
X\_Freq = 399.78219838[MHz]  
X\_Offset = 5[ppm]  
X\_Points = 16384  
X\_Prescans = 1  
X\_Resolution = 0.45739775[Hz]  
X\_Sweep = 7.4940048[kHz]  
X\_Sweep\_Clippped = 5.99520384[kHz]  
Irr\_Domain = Proton  
Irr\_Freq = 399.78219838[MHz]  
Irr\_Offset = 5[ppm]  
Tri\_Domain = Proton  
Tri\_Freq = 399.78219838[MHz]  
Tri\_Offset = 5[ppm]  
Clipped = FALSE  
Scans = 8  
Total\_Scans = 8

Relaxation\_Delay = 5[s]  
Recvr\_Gain = 56  
Temp\_Get = 21.1[dC]  
X\_90\_Width = 9.5[us]  
X\_Acq\_Time = 2.18628096[s]  
X\_Angle = 45[deg]  
X\_Atn = 2[dB]  
X\_Pulse = 4.75[us]  
Irr\_Mode = Off  
Tri\_Mode = Off  
Dante\_Loop = 500  
Dante\_Presat = FALSE

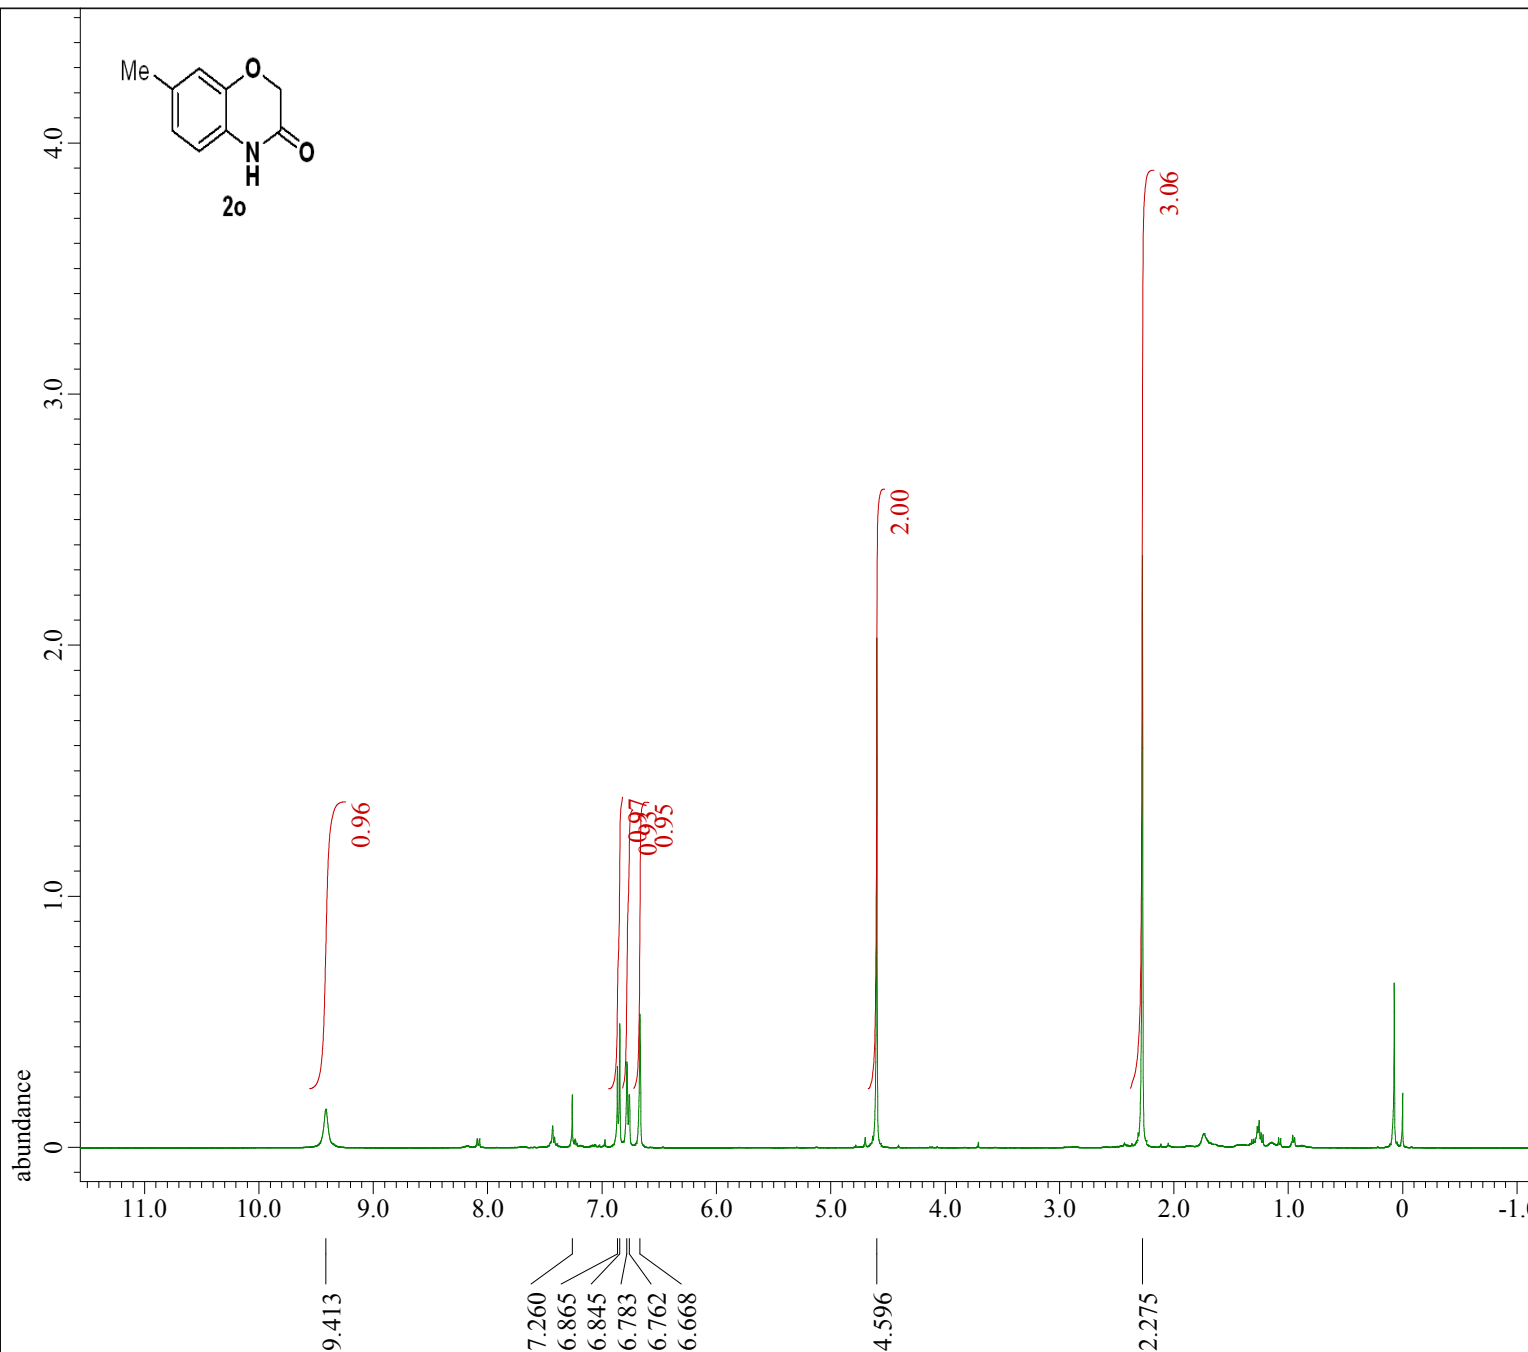

X : parts per Million : Proton





---- PROCESSING PARAMETERS ----

```
sexp( 2.0[Hz], 0.0[s] )
trapezoid( 0[%], 0[%], 80[%], 100[%] )
zerofill( 1 )
fft( 1, TRUE, TRUE )
machinephase
ppm
```

Derived from: LK120904\_Carbon-1-1.jdf

```
Filename      = LK120904_Carbon-1-
Author       = delta
Experiment   = carbon.jxp
Sample Id    = LK120904
Solvent      = CHLOROFORM-D
Actual_Start_Time = 14-DEC-2016 14:07:
Revision_Time   = 4-AUG-2017 23:42:
```

```
Comment      = single pulse decou
Data_Format  = 1D COMPLEX
Dim_Size     = 26214
Dim Title    = Carbon13
Dim Units    = [ppm]
Dimensions   = X
Spectrometer = JNM-ECZ400S/L1
```

```
Field_Strength = 9.389766[T] (400[M]
X_Acq_Duration = 1.03809024[s]
X_Domain       = 13C
X_Freq         = 100.52530333[MHz]
X_Offset       = 100[ppm]
X_Points       = 32768
X_Prescans     = 4
X_Resolution   = 0.96330739[Hz]
X_Sweep        = 31.56565657[kHz]
X_Sweep_Clippped = 25.25252525[kHz]
Irr_Domain     = Proton
Irr_Freq       = 399.78219838[MHz]
Irr_Offset     = 5[ppm]
Clipped        = FALSE
Scans          = 248
Total_Scans    = 248
```

```
Relaxation_Delay = 2[s]
Recvr Gain       = 50
Temp_Get         = 21.5[dC]
X_90_Width       = 8.8[us]
X_Acq_Time       = 1.03809024[s]
X_Angle          = 30[deg]
X_Atn            = 3.4[dB]
X_Pulse          = 2.93333333[us]
Irr_Atn_Dec      = 23.66[dB]
Irr_Atn_Dec_Calc = 23.66[dB]
Irr_Atn_Dec_Default_Calc = 23.66[dB]
Irr_Atn_No     = 23.66[dB]
Irr_Dec_Bandwidth_Hz = 4.7826087[kHz]
Irr_Dec_Bandwidth_Ppm = 11.96303566[ppm]
Irr_Dec_Freq     = 399.78219838[MHz]
```

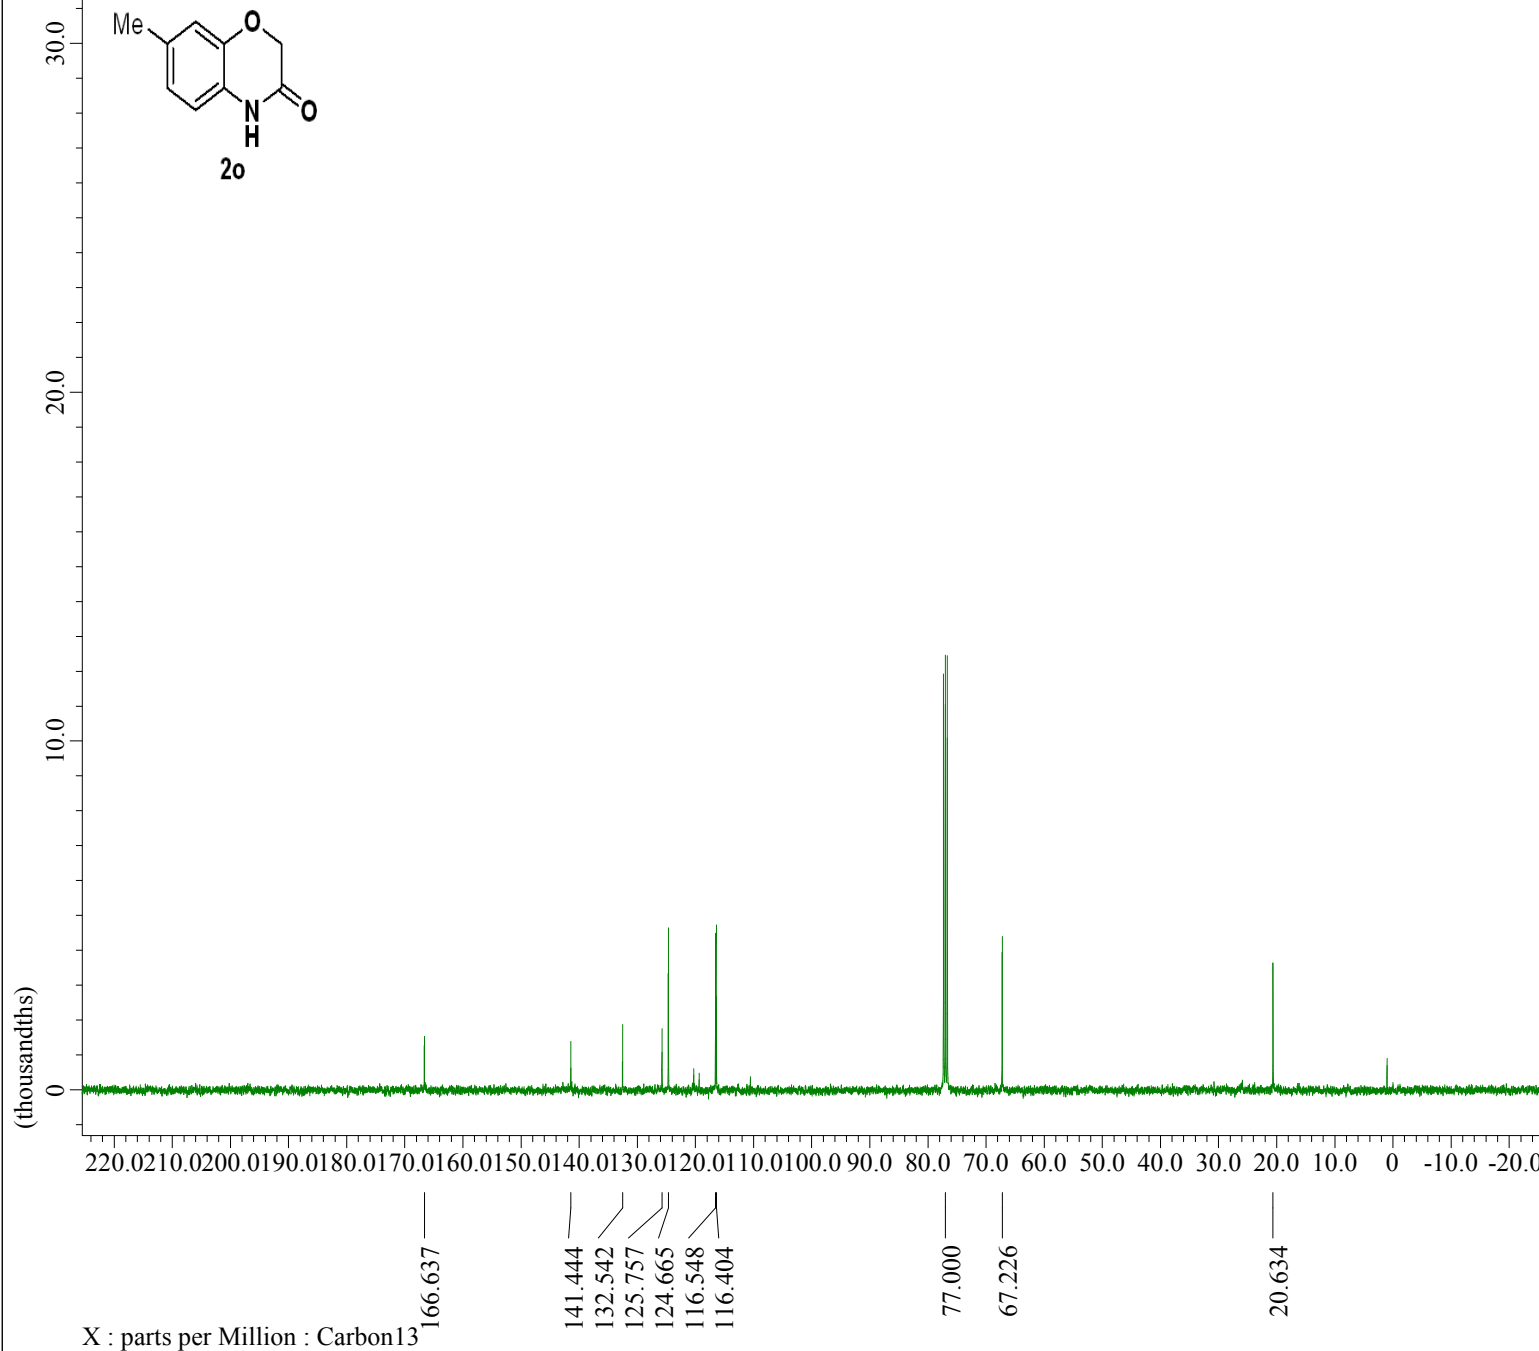

X : parts per Million : Carbon13

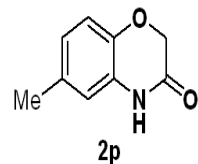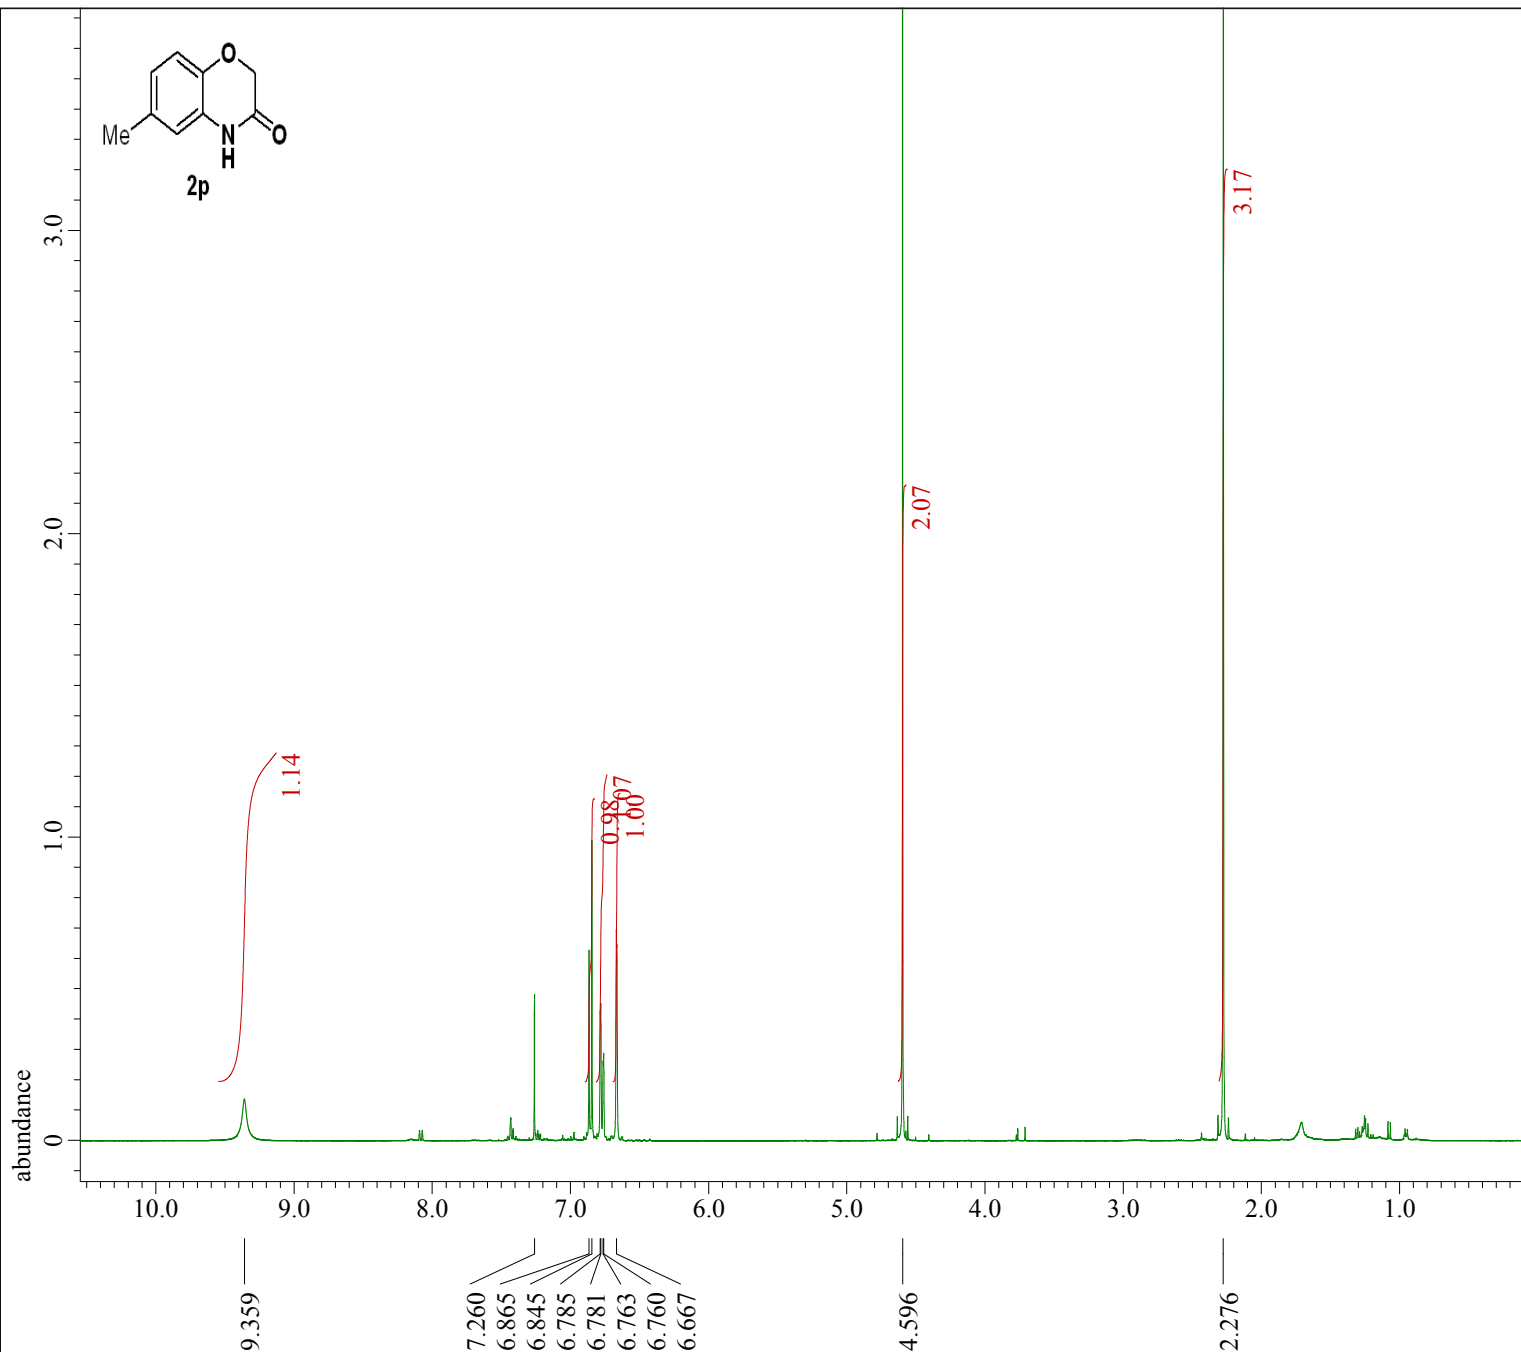

X : parts per Million : Proton

---- PROCESSING PARAMETERS ----  
sexp( 0.2[Hz], 0.0[s] )  
trapezoid( 0[%], 0[%], 80[%], 100[%] )  
zerofill( 1 )  
fft( 1, TRUE, TRUE )  
machinephase  
ppm  
Derived from: LK120903\_Proton-1-1.jdf

Filename = LK120903\_Proton-1-3.j  
Author = delta  
Experiment = proton.jxp  
Sample Id = LK120903  
Solvent = CHLOROFORM-D  
Actual\_Start\_Time = 14-DEC-2016 11:48:44  
Revision\_Time = 4-AUG-2017 23:51:59

Comment = single\_pulse  
Data\_Format = 1D COMPLEX  
Dim\_Size = 13107  
Dim\_Title = Proton  
Dim\_Units = [ppm]  
Dimensions = X  
Spectrometer = JNM-ECZ400S/L1

Field\_Strength = 9.389766[T] (400[MHz])  
X\_Acq\_Duration = 2.18628096[s]  
X\_Domain = 1H  
X\_Freq = 399.78219838[MHz]  
X\_Offset = 5[ppm]  
X\_Points = 16384  
X\_Prescans = 1  
X\_Resolution = 0.45739775[Hz]  
X\_Sweep = 7.4940048[kHz]  
X\_Sweep\_Clippped = 5.99520384[kHz]  
Irr\_Domain = Proton  
Irr\_Freq = 399.78219838[MHz]  
Irr\_Offset = 5[ppm]  
Tri\_Domain = Proton  
Tri\_Freq = 399.78219838[MHz]  
Tri\_Offset = 5[ppm]  
Clipped = FALSE  
Scans = 8  
Total\_Scans = 8

Relaxation\_Delay = 5[s]  
Recvr\_Gain = 56  
Temp\_Get = 21.1[dC]  
X\_90\_Width = 9.5[us]  
X\_Acq\_Time = 2.18628096[s]  
X\_Angle = 45[deg]  
X\_Atn = 2[dB]  
X\_Pulse = 4.75[us]  
Irr\_Mode = Off  
Tri\_Mode = Off  
Dante\_Loop = 500  
Dante\_Presat = FALSE

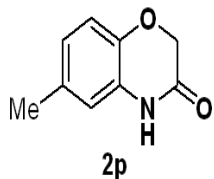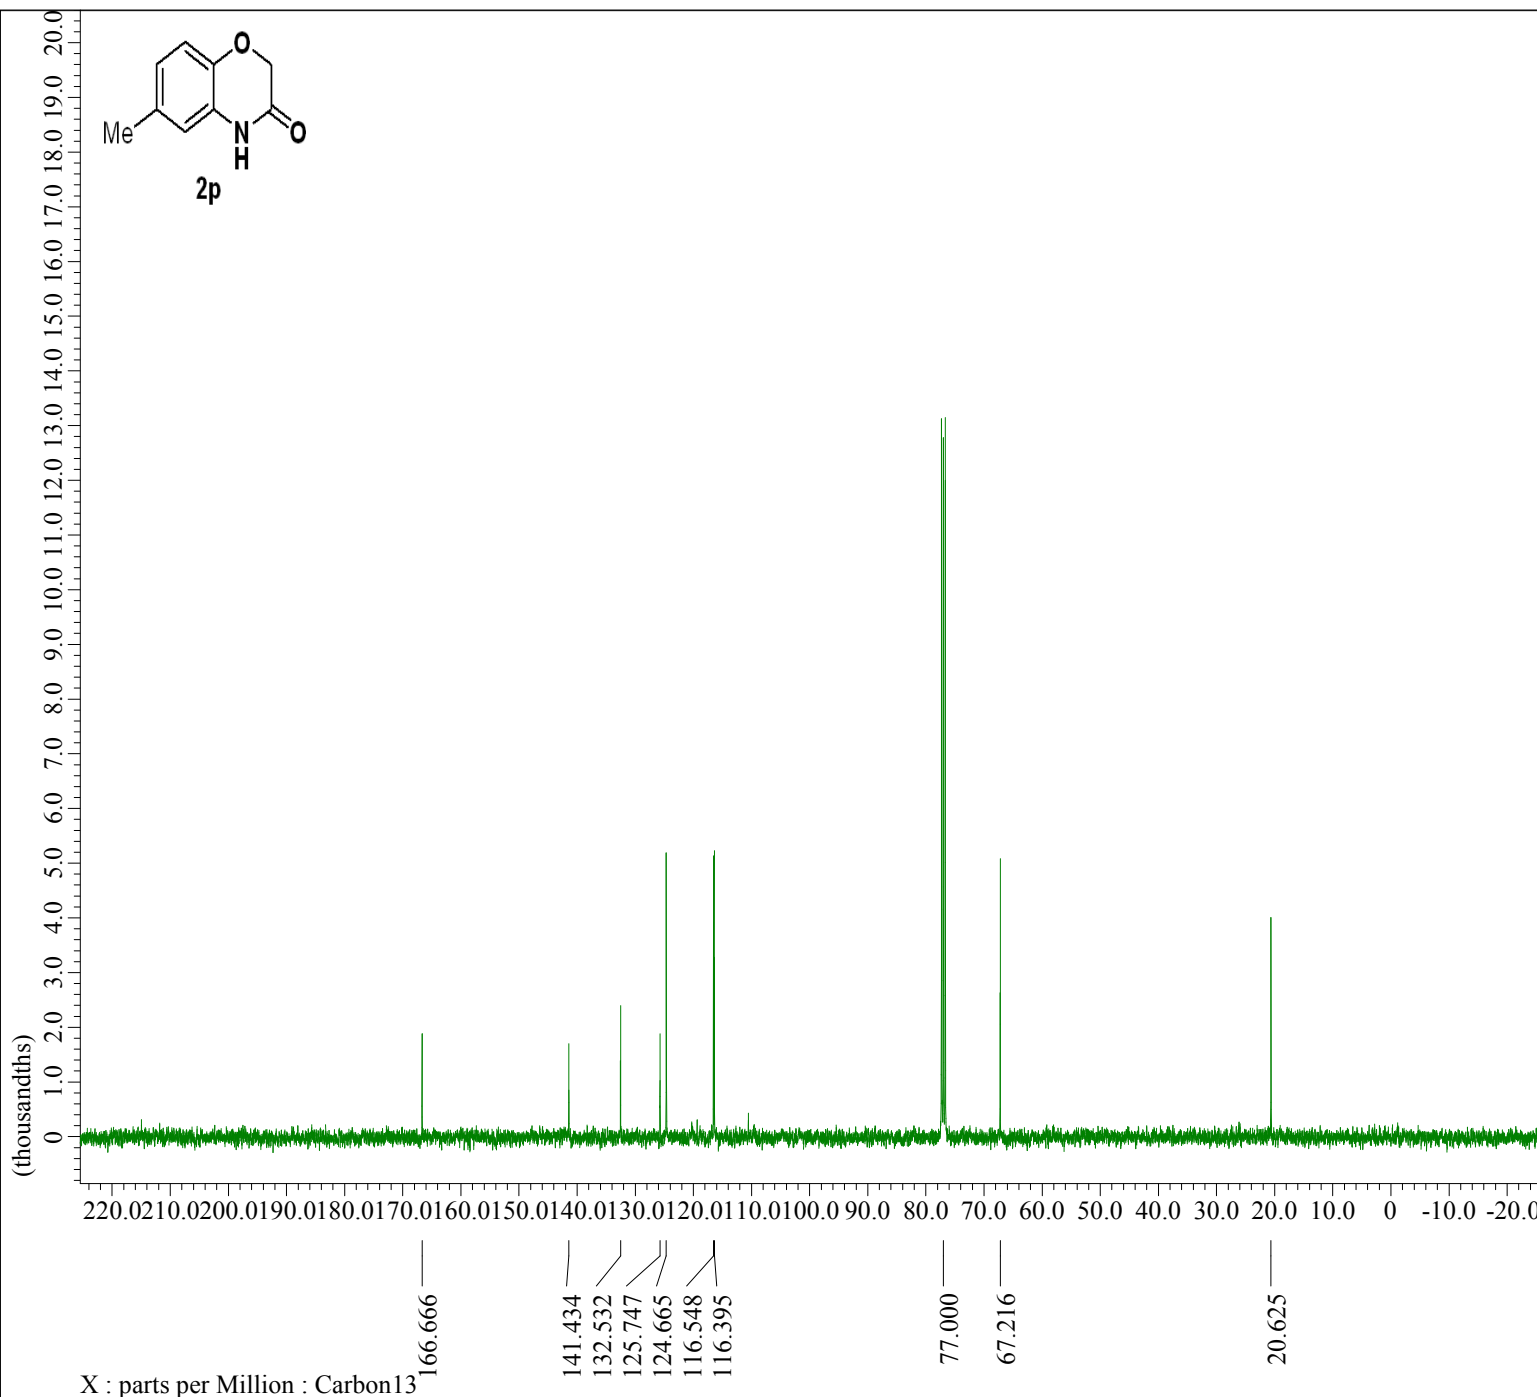

---- PROCESSING PARAMETERS ----

```
sexp( 2.0[Hz], 0.0[s] )
trapezoid( 0[%], 0[%], 80[%], 100[%] )
zerofill( 1 )
fft( 1, TRUE, TRUE )
machinephase
ppm
```

Derived from: LK120903\_Carbon-1-1.jdf

```
Filename           = LK120903_Carbon-1-
Author             = delta
Experiment         = carbon.jxp
Sample Id          = LK120903
Solvent            = CHLOROFORM-D
Actual_Start_Time  = 14-DEC-2016 13:53:
Revision_Time      = 4-AUG-2017 23:54:
```

```
Comment           = single pulse decou
Data_Format       = 1D COMPLEX
Dim_Size          = 26214
Dim Title         = Carbon13
Dim Units         = [ppm]
Dimensions        = X
Spectrometer      = JNM-ECZ400S/L1
```

```
Field_Strength    = 9.389766[T] (400[M
X_Acq_Duration    = 1.03809024[s]
X_Domain          = 13C
X_Freq            = 100.52530333[MHz]
X_Offset          = 100[ppm]
X_Points          = 32768
X_Prescans        = 4
X_Resolution      = 0.96330739[Hz]
X_Sweep           = 31.56565657[kHz]
X_Sweep_Clipped   = 25.25252525[kHz]
Irr_Domain        = Proton
Irr_Freq          = 399.78219838[MHz]
Irr_Offset        = 5[ppm]
Clipped           = FALSE
Scans             = 161
Total_Scans       = 161
```

```
Relaxation_Delay  = 2[s]
Recvr Gain        = 50
Temp_Get          = 21.3[dC]
X_90_Width        = 8.8[us]
X_Acq_Time        = 1.03809024[s]
X_Angle           = 30[deg]
X_Atn             = 3.4[dB]
X_Pulse           = 2.93333333[us]
Irr_Atn_Dec       = 23.66[dB]
Irr_Atn_Dec_Calc = 23.66[dB]
Irr_Atn_Dec_Default_Calc = 23.66[dB]
Irr_Atn_Noise    = 23.66[dB]
Irr_Dec_Bandwidth_Hz = 4.7826087[kHz]
Irr_Dec_Bandwidth_Ppm = 11.96303566[ppm]
Irr_Dec_Freq     = 399.78219838[MHz]
```

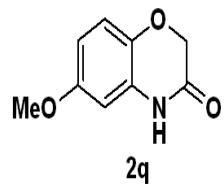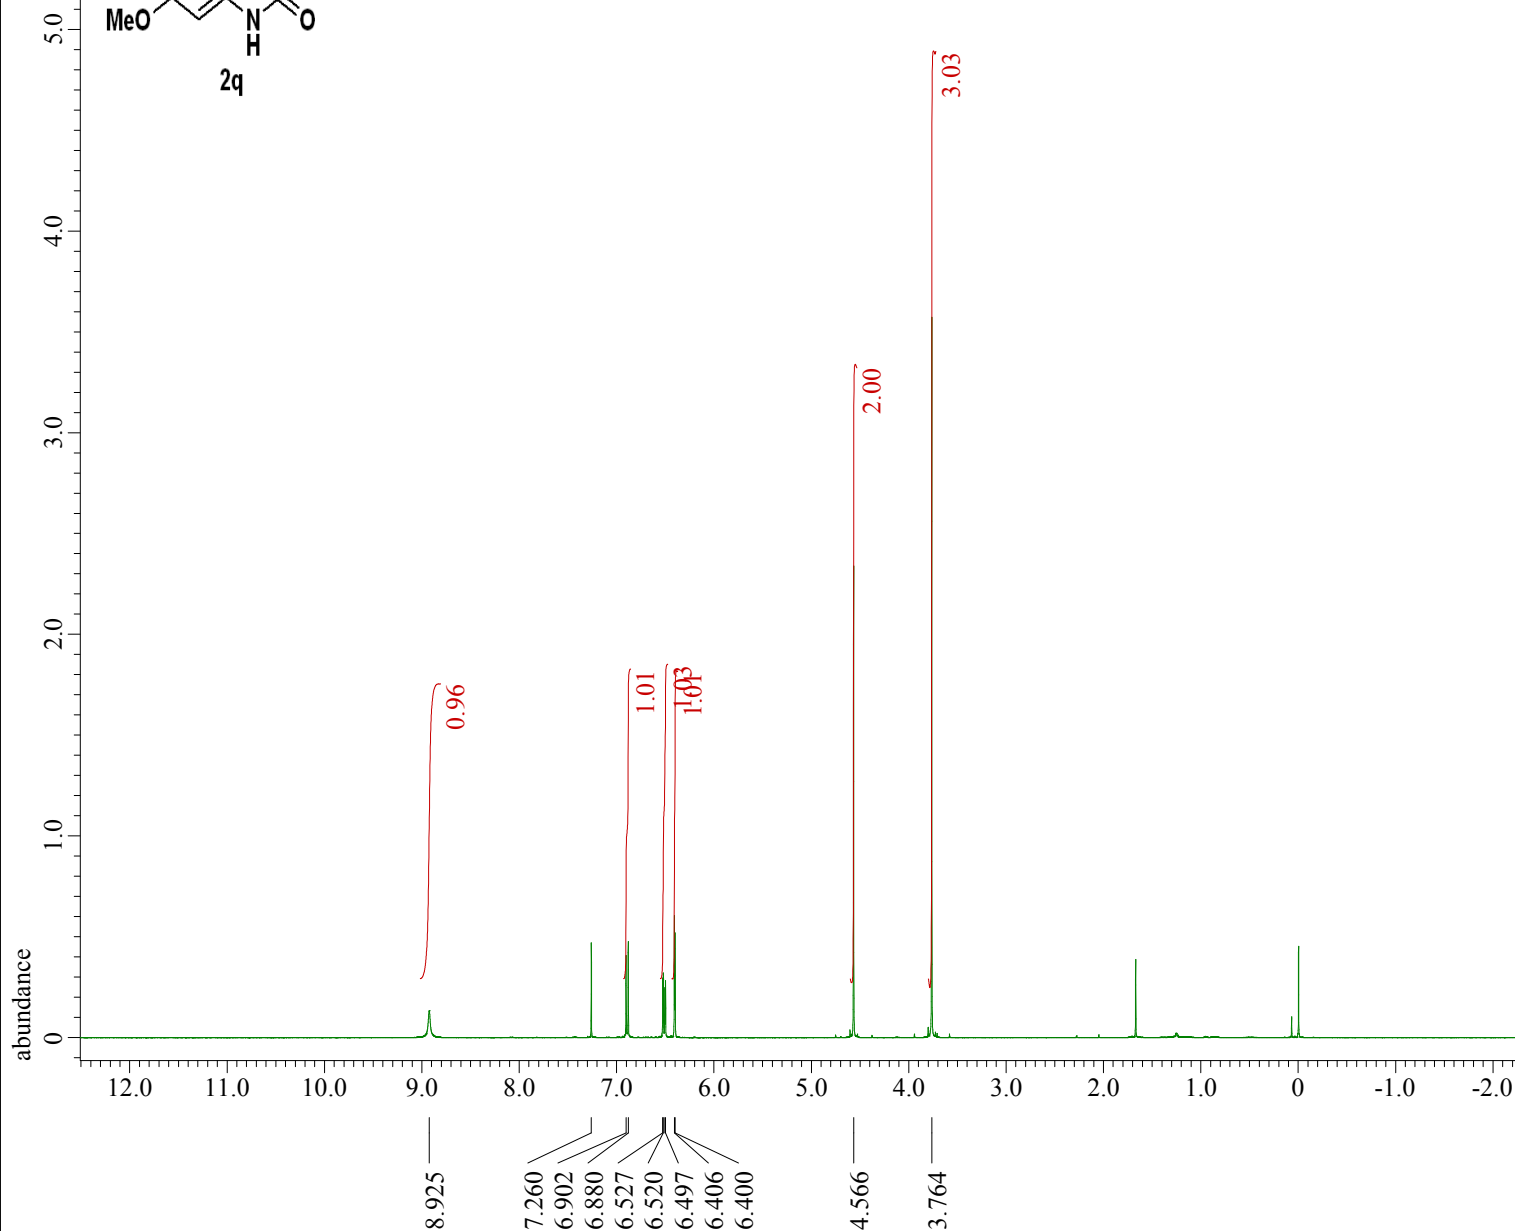

X : parts per Million : Proton

```
---- PROCESSING PARAMETERS ----
sexp( 0.2[Hz], 0.0[s] )
trapezoid( 0[%], 0[%], 80[%], 100[%] )
zerofill( 1 )
fft( 1, TRUE, TRUE )
machinephase
ppm
```

```
Filename      = LK1206-5_Proton-1-3.j
Author       = delta
Experiment   = proton.jxp
Sample Id    = LK1206-5
Solvent      = CHLOROFORM-D
Actual_Start_Time = 6-DEC-2016 12:08:28
Revision_Time   = 5-AUG-2017 00:03:47
```

```
Comment      = single_pulse
Data_Format  = 1D COMPLEX
Dim_Size     = 13107
Dim_Title    = Proton
Dim_Units    = [ppm]
Dimensions   = X
Spectrometer = JNM-ECZ400S/L1
```

```
Field_Strength = 9.389766[T] (400[MHz])
X_Acq_Duration = 2.18628096[s]
X_Domain       = 1H
X_Freq         = 399.78219838[MHz]
X_Offset       = 5[ppm]
X_Points       = 16384
X_Prescans     = 1
X_Resolution   = 0.45739775[Hz]
X_Sweep        = 7.4940048[kHz]
X_Sweep_Clippped = 5.99520384[kHz]
Irr_Domain     = Proton
Irr_Freq       = 399.78219838[MHz]
Irr_Offset     = 5[ppm]
Tri_Domain     = Proton
Tri_Freq       = 399.78219838[MHz]
Tri_Offset     = 5[ppm]
Clipped       = FALSE
Scans          = 8
Total_Scans    = 8
```

```
Relaxation_Delay = 5[s]
Recvr_Gain       = 56
Temp_Get         = 18.6[dC]
X_90_Width       = 9.5[us]
X_Acq_Time       = 2.18628096[s]
X_Angle          = 45[deg]
X_Atn            = 2[dB]
X_Pulse          = 4.75[us]
Irr_Mode         = Off
Tri_Mode         = Off
Dante_Loop       = 500
Dante_Presat     = FALSE
```



---- PROCESSING PARAMETERS ----

```
sexp( 2.0[Hz], 0.0[s] )
trapezoid( 0[%], 0[%], 80[%], 100[%] )
zerofill( 1 )
fft( 1, TRUE, TRUE )
machinephase
ppm
```

Derived from: LK1206-5\_Carbon-1-1.jdf

```
Filename           = LK1206-5_Carbon-1-
Author             = delta
Experiment         = carbon.jxp
Sample_Id          = LK1206-5
Solvent            = CHLOROFORM-D
Actual_Start_Time  = 6-DEC-2016 15:26:
Revision_Time      = 4-AUG-2017 23:58:
```

```
Comment           = single pulse decou
Data_Format       = 1D COMPLEX
Dim_Size          = 26214
Dim_Title         = Carbon13
Dim_Units         = [ppm]
Dimensions        = X
Spectrometer      = JNM-ECZ400S/L1
```

```
Field_Strength    = 9.389766[T] (400[M
X_Acq_Duration    = 1.03809024[s]
X_Domain          = 13C
X_Freq            = 100.52530333[MHz]
X_Offset          = 100[ppm]
X_Points          = 32768
X_Prescans        = 4
X_Resolution      = 0.96330739[Hz]
X_Sweep           = 31.56565657[kHz]
X_Sweep_Clipped   = 25.25252525[kHz]
Irr_Domain        = Proton
Irr_Freq          = 399.78219838[MHz]
Irr_Offset        = 5[ppm]
Clipped           = TRUE
Scans              = 502.0
Total_Scans       = 502.0
```

```
Relaxation_Delay  = 2[s]
Recvr Gain        = 50
Temp_Get          = 20[dC]
X_90_Width        = 8.8[us]
X_Acq_Time        = 1.03809024[s]
X_Angle           = 30[deg]
X_Atn             = 3.4[dB]
X_Pulse           = 2.93333333[us]
Irr_Atn_Dec       = 23.66[dB]
Irr_Atn_Dec_Calc  = 23.66[dB]
Irr_Atn_Dec_Default_Calc = 23.66[dB]
Irr_Atn_Noise    = 23.66[dB]
Irr_Dec_Bandwidth_Hz = 4.7826087[kHz]
Irr_Dec_Bandwidth_Ppm = 11.96303566[ppm]
Irr_Dec_Freq      = 399.78219838[MHz]
```

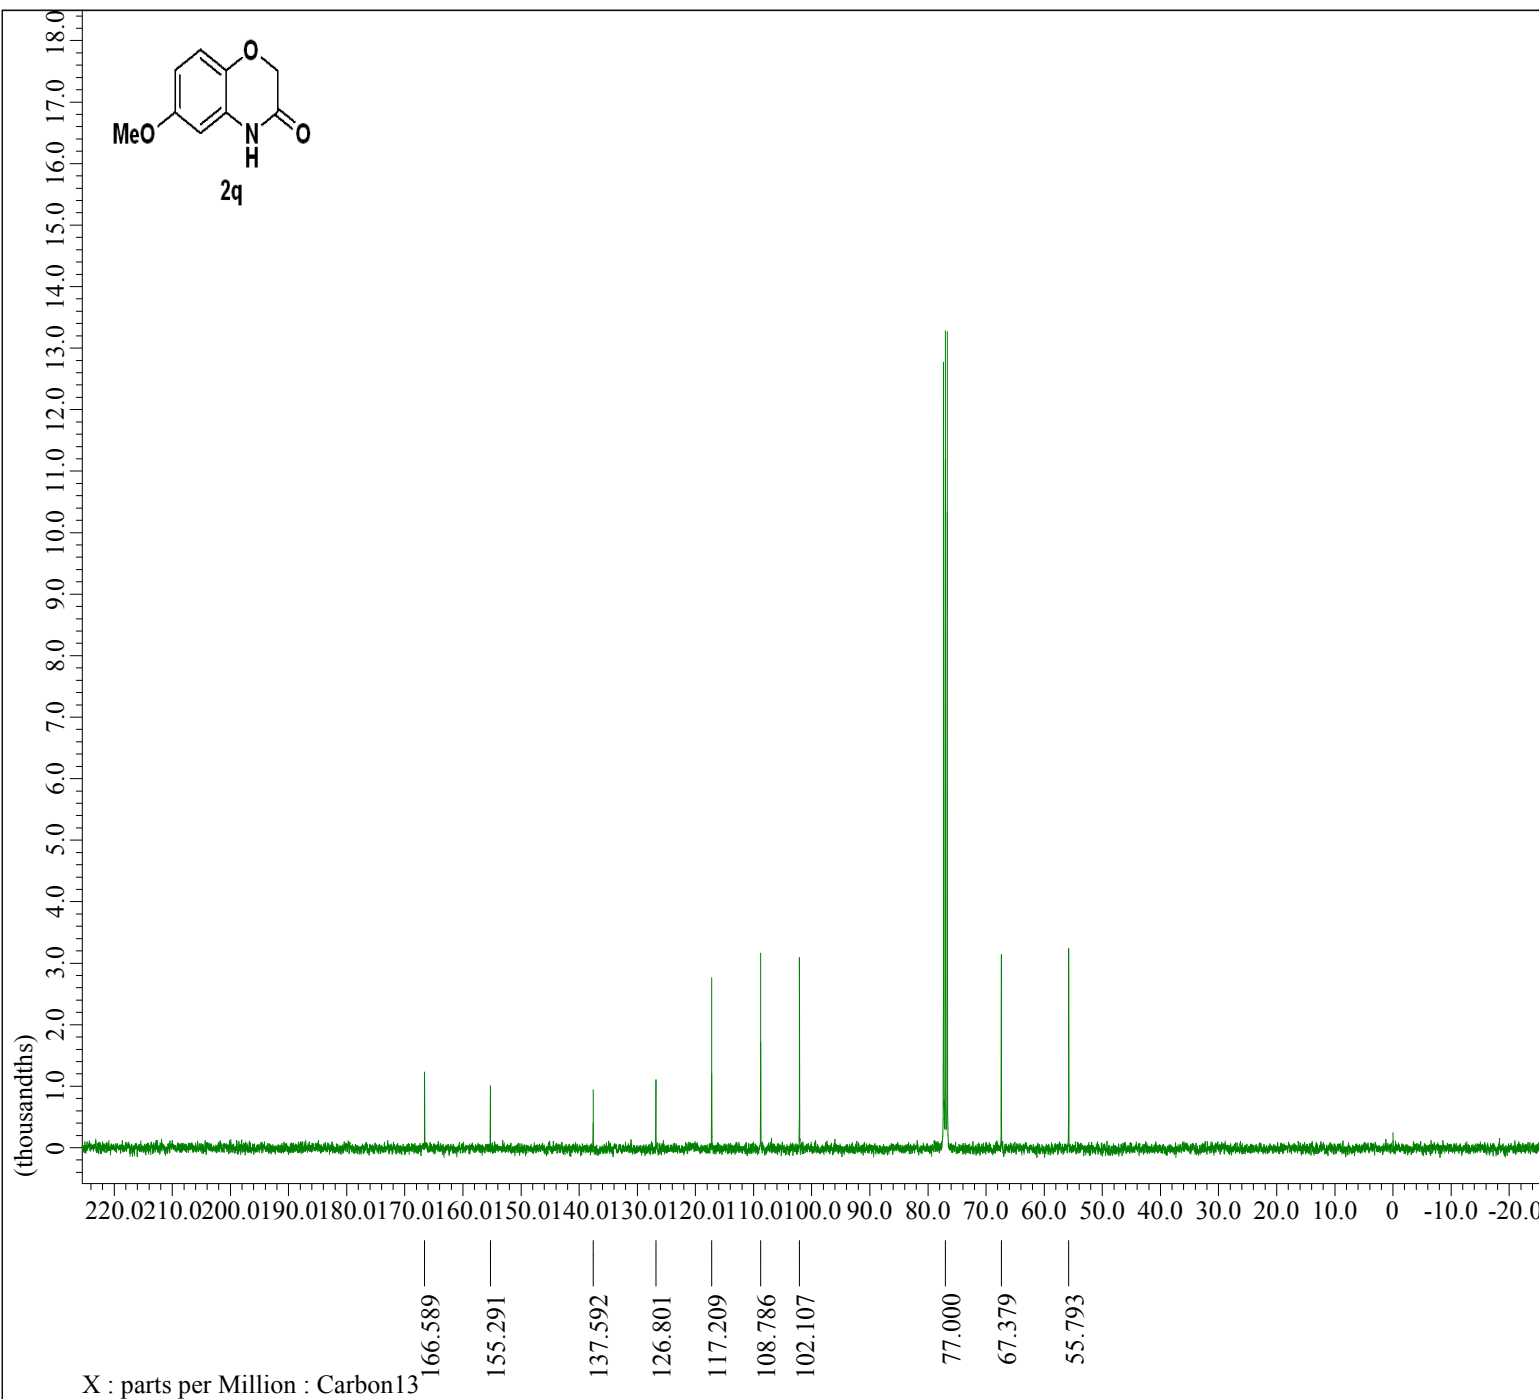



---- PROCESSING PARAMETERS ----  
sexp( 0.2[Hz], 0.0[s] )  
trapezoid( 0[%], 0[%], 80[%], 100[%] )  
zerofill( 1 )  
fft( 1, TRUE, TRUE )  
machinephase  
ppm  
Derived from: LK0224-4\_Proton-1-1.jdf

Filename = LK0224-4\_Proton-1-3.j  
Author = delta  
Experiment = proton.jxp  
Sample Id = LK0224-4  
Solvent = CHLOROFORM-D  
Actual\_Start\_Time = 24-FEB-2017 18:07:08  
Revision\_Time = 5-AUG-2017 00:15:37

Comment = single\_pulse  
Data\_Format = 1D\_COMPLEX  
Dim\_Size = 13107  
Dim\_Title = Proton  
Dim\_Units = [ppm]  
Dimensions = X  
Spectrometer = JNM-ECZ400S/L1

Field\_Strength = 9.389766[T] (400[MHz])  
X\_Acq\_Duration = 2.18628096[s]  
X\_Domain = 1H  
X\_Freq = 399.78219838[MHz]  
X\_Offset = 5[ppm]  
X\_Points = 16384  
X\_Prescans = 1  
X\_Resolution = 0.45739775[Hz]  
X\_Sweep = 7.4940048[kHz]  
X\_Sweep\_Clippped = 5.99520384[kHz]  
Irr\_Domain = Proton  
Irr\_Freq = 399.78219838[MHz]  
Irr\_Offset = 5[ppm]  
Tri\_Domain = Proton  
Tri\_Freq = 399.78219838[MHz]  
Tri\_Offset = 5[ppm]  
Clipped = FALSE  
Scans = 8  
Total\_Scans = 8

Relaxation\_Delay = 5[s]  
Recvr\_Gain = 56  
Temp\_Get = 20.9[dC]  
X\_90\_Width = 9.5[us]  
X\_Acq\_Time = 2.18628096[s]  
X\_Angle = 45[deg]  
X\_Atn = 2[dB]  
X\_Pulse = 4.75[us]  
Irr\_Mode = Off  
Tri\_Mode = Off  
Dante\_Loop = 500  
Dante\_Presat = FALSE

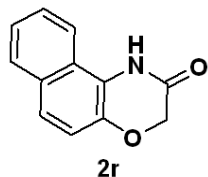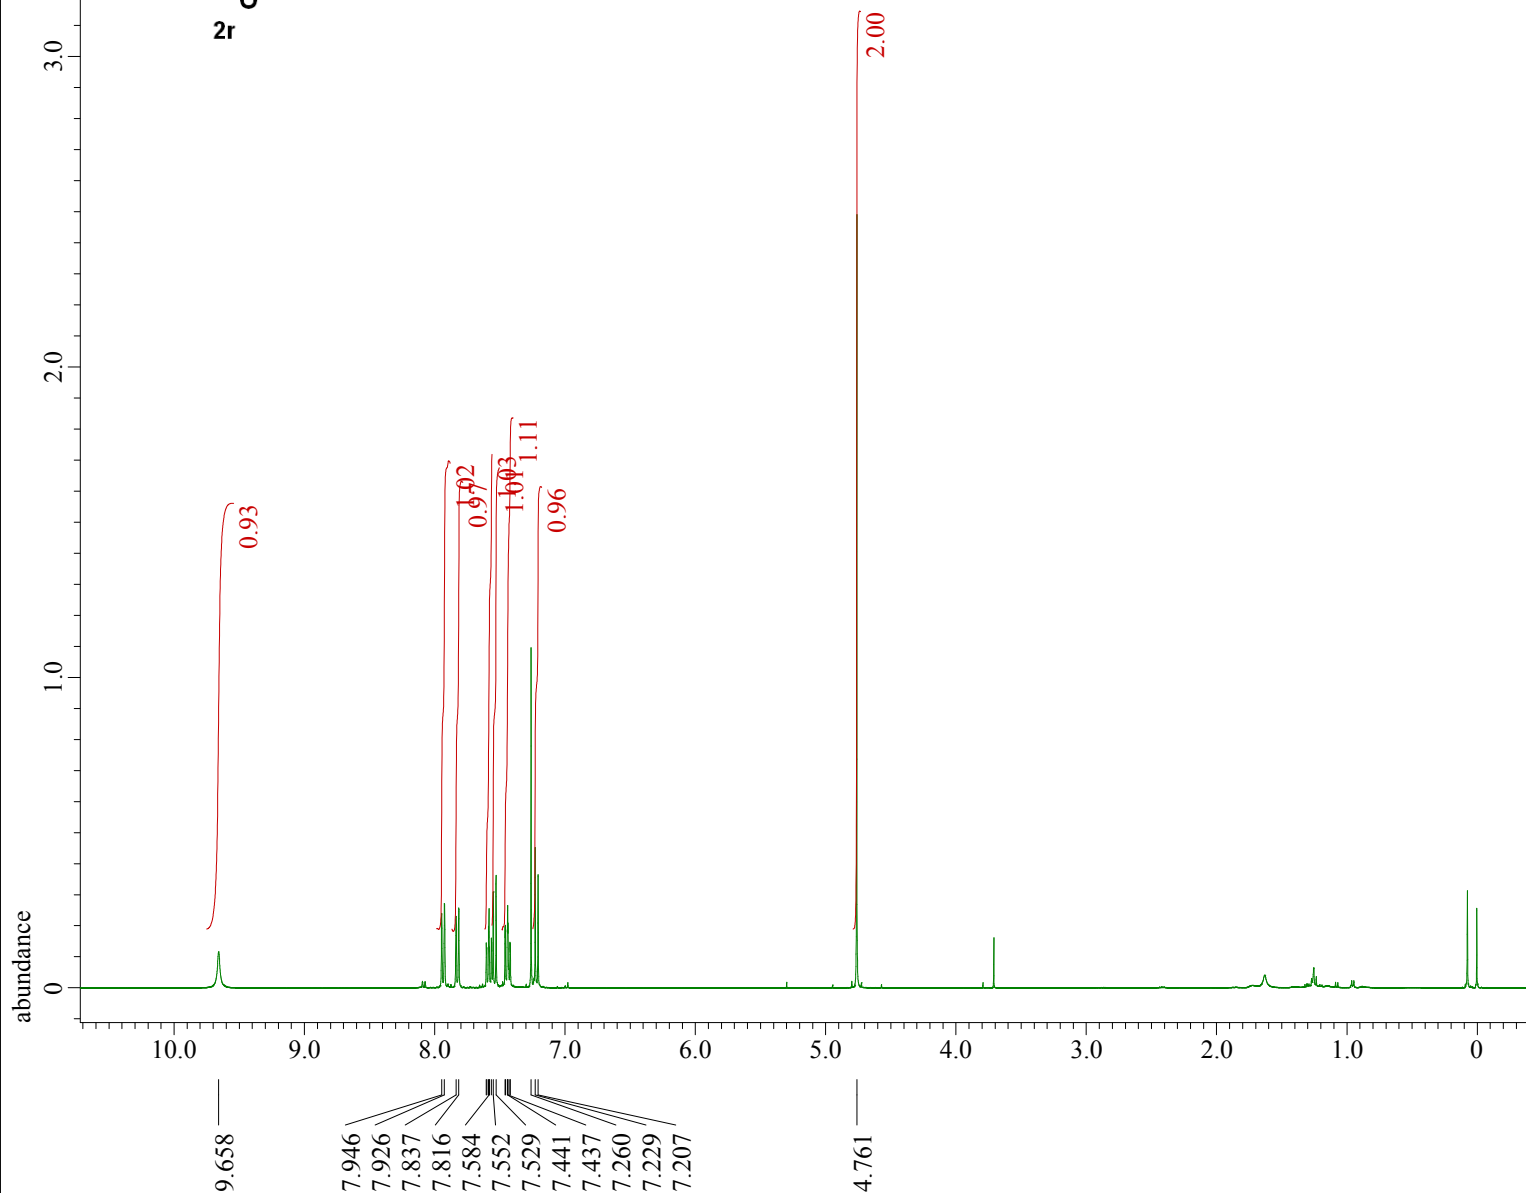

X : parts per Million : Proton



---- PROCESSING PARAMETERS ----

```
sexp( 2.0[Hz], 0.0[s] )
trapezoid( 0[%], 0[%], 80[%], 100[%] )
zerofill( 1 )
fft( 1, TRUE, TRUE )
machinephase
ppm
```

Derived from: LK0224-4\_Carbon-1-1.jdf

```
Filename           = LK0224-4_Carbon-1-
Author             = delta
Experiment         = carbon.jxp
Sample Id          = LK0224-4
Solvent            = CHLOROFORM-D
Actual_Start_Time  = 24-FEB-2017 18:10:
Revision_Time      = 5-AUG-2017 00:25:
```

```
Comment           = single pulse decou
Data_Format        = 1D COMPLEX
Dim_Size           = 26214
Dim_Title          = Carbon13
Dim_Units          = [ppm]
Dimensions         = X
Spectrometer       = JNM-ECZ400S/L1
```

```
Field_Strength    = 9.389766[T] (400[M
X_Acq_Duration     = 1.03809024[s]
X_Domain           = 13C
X_Freq             = 100.52530333[MHz]
X_Offset           = 100[ppm]
X_Points           = 32768
X_Prescans         = 4
X_Resolution       = 0.96330739[Hz]
X_Sweep            = 31.56565657[kHz]
X_Sweep_Clipped    = 25.25252525[kHz]
Irr_Domain         = Proton
Irr_Freq           = 399.78219838[MHz]
Irr_Offset         = 5[ppm]
Clipped            = FALSE
Scans              = 417
Total_Scans        = 417
```

```
Relaxation_Delay  = 2[s]
Recvr Gain        = 50
Temp_Get          = 19.7[dC]
X_90_Width        = 8.8[us]
X_Acq_Time        = 1.03809024[s]
X_Angle           = 30[deg]
X_Atn             = 3.4[dB]
X_Pulse           = 2.93333333[us]
Irr_Atn_Dec       = 23.66[dB]
Irr_Atn_Dec_Calc  = 23.66[dB]
Irr_Atn_Dec_Default_Calc = 23.66[dB]
Irr_Atn_Noex     = 23.66[dB]
Irr_Dec_Bandwidth_Hz = 4.7826087[kHz]
Irr_Dec_Bandwidth_Ppm = 11.96303566[ppm]
Irr_Dec_Freq      = 399.78219838[MHz]
```

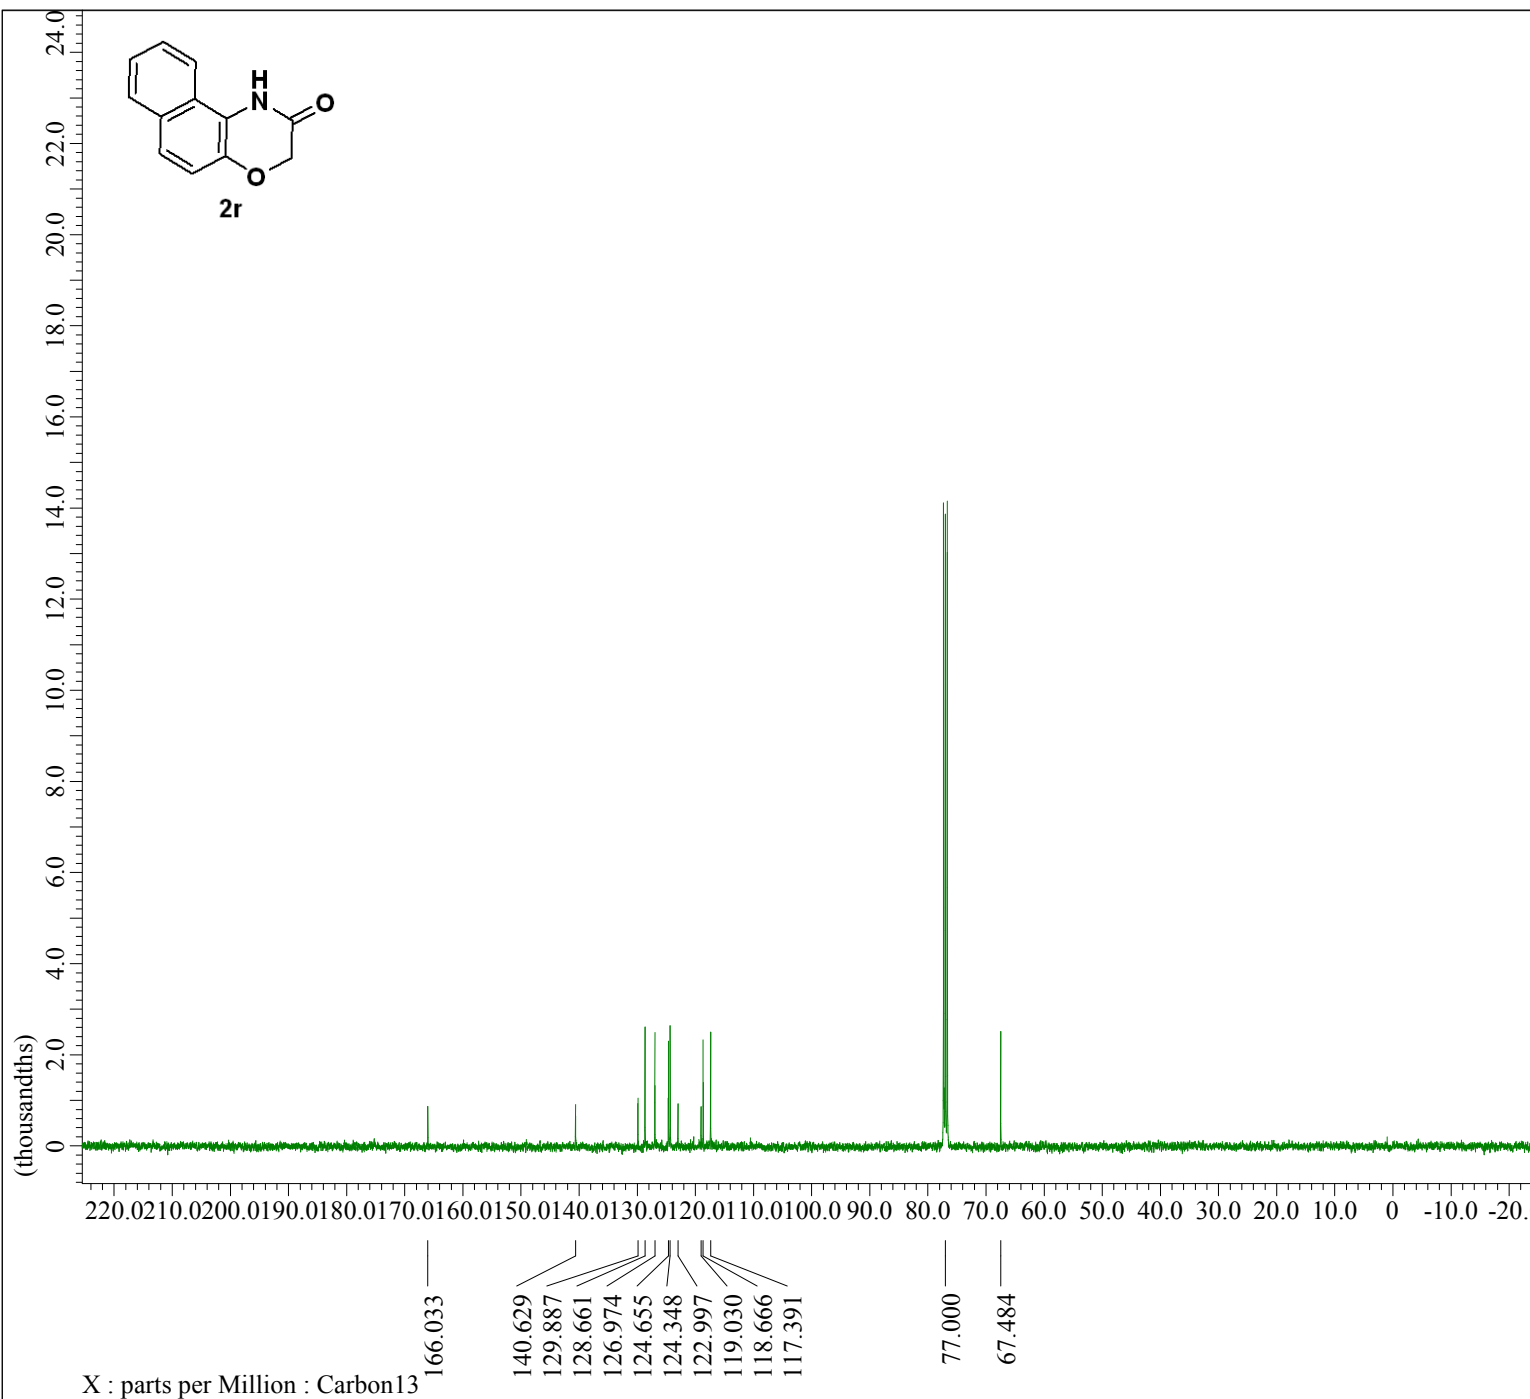

X : parts per Million : Carbon13



---- PROCESSING PARAMETERS ----

```
sxpc( 0.2[Hz], 0.0[s] )  
trapezoid( 0[%], 0[%], 80[%], 100[%] )  
zerofill( 1 )  
fft( 1, TRUE, TRUE )  
machinephase  
ppm
```

Derived from: LK0224-3\_Proton-1-1.jdf

```
Filename      = LK0224-3_Proton-1-3.j  
Author       = delta  
Experiment   = proton.jxp  
Sample Id    = LK0224-3  
Solvent      = CHLOROFORM-D  
Actual_Start_Time = 24-FEB-2017 17:45:29  
Revision_Time   = 5-AUG-2017 00:31:21
```

```
Comment      = single_pulse  
Data_Format  = 1D COMPLEX  
Dim_Size     = 13107  
Dim_Title    = Proton  
Dim_Units    = [ppm]  
Dimensions   = X  
Spectrometer = JNM-ECZ400S/L1
```

```
Field_Strength = 9.389766[T] (400[MHz])  
X_Acq_Duration = 2.18628096[s]  
X_Domain       = 1H  
X_Freq         = 399.78219838[MHz]  
X_Offset       = 5[ppm]  
X_Points       = 16384  
X_Prescans     = 1  
X_Resolution   = 0.45739775[Hz]  
X_Sweep        = 7.4940048[kHz]  
X_Sweep_Clippped = 5.99520384[kHz]  
Irr_Domain     = Proton  
Irr_Freq       = 399.78219838[MHz]  
Irr_Offset     = 5[ppm]  
Tri_Domain     = Proton  
Tri_Freq       = 399.78219838[MHz]  
Tri_Offset     = 5[ppm]  
Clipped        = FALSE  
Scans          = 8  
Total_Scans    = 8
```

```
Relaxation_Delay = 5[s]  
Recvr_Gain       = 66  
Temp_Get         = 22.1[dC]  
X_90_Width       = 9.5[us]  
X_Acq_Time       = 2.18628096[s]  
X_Angle          = 45[deg]  
X_Atn            = 2[dB]  
X_Pulse          = 4.75[us]  
Irr_Mode         = Off  
Tri_Mode         = Off  
Dante_Loop       = 500  
Dante_Presat     = FALSE
```

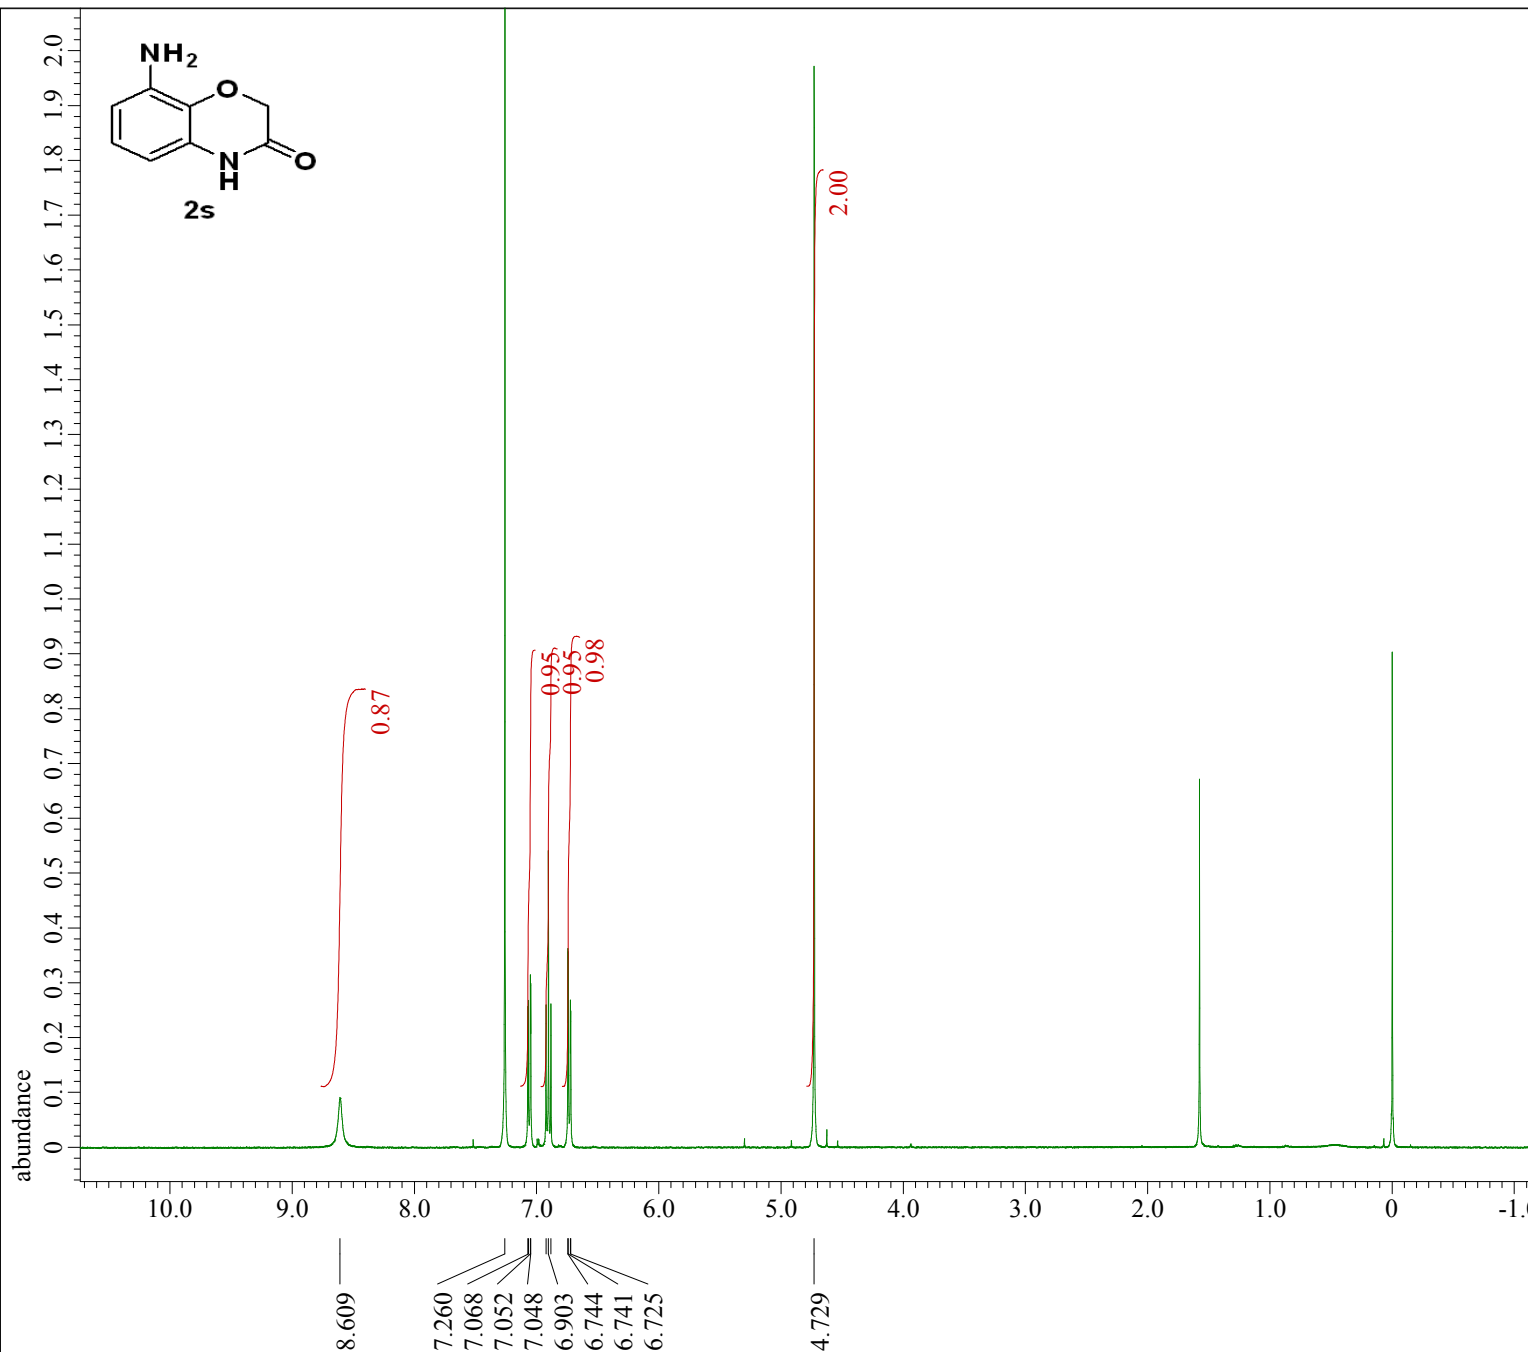

X : parts per Million : Proton



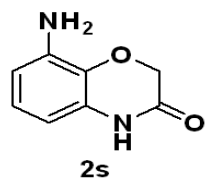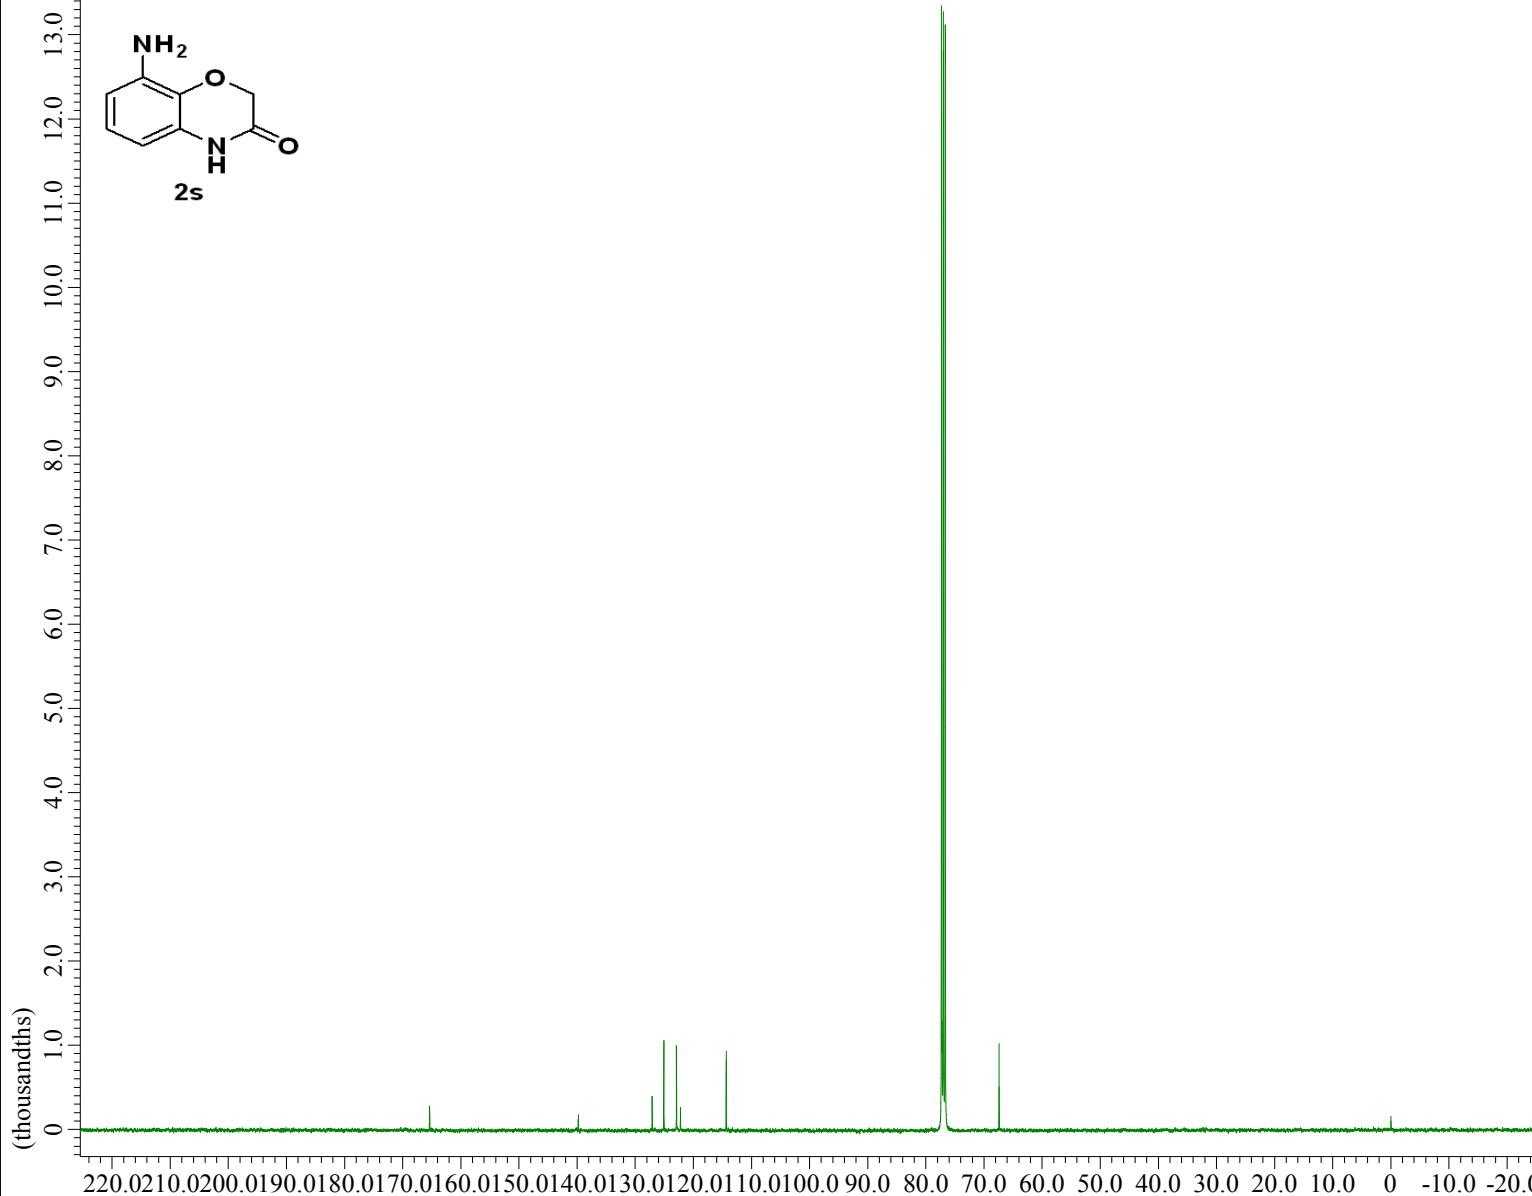

X : parts per Million : Carbon13

---- PROCESSING PARAMETERS ----  
sexp( 2.0[Hz], 0.0[s] )  
trapezoid( 0[%], 0[%], 80[%], 100[%] )  
zerofill( 1 )  
fft( 1, TRUE, TRUE )  
machinephase  
ppm  
Derived from: LK0224-3\_Carbon-1-1.jdf

|                          |                      |
|--------------------------|----------------------|
| Filename                 | = LK0224-3_Carbon-1- |
| Author                   | = delta              |
| Experiment               | = carbon.jxp         |
| Sample Id                | = LK0224-3           |
| Solvent                  | = CHLOROFORM-D       |
| Actual_Start_Time        | = 24-FEB-2017 23:57: |
| Revision_Time            | = 5-AUG-2017 00:29:  |
| Comment                  | = single pulse decou |
| Data_Format              | = 1D COMPLEX         |
| Dim_Size                 | = 26214              |
| Dim_Title                | = Carbon13           |
| Dim_Units                | = [ppm]              |
| Dimensions               | = X                  |
| Spectrometer             | = JNM-ECZ400S/L1     |
| Field_Strength           | = 9.389766[T] (400[M |
| X_Acq_Duration           | = 1.03809024[s]      |
| X_Domain                 | = 13C                |
| X_Freq                   | = 100.52530333[MHz]  |
| X_Offset                 | = 100[ppm]           |
| X_Points                 | = 32768              |
| X_Prescans               | = 4                  |
| X_Resolution             | = 0.96330739[Hz]     |
| X_Sweep                  | = 31.56565657[kHz]   |
| X_Sweep_Clipped          | = 25.25252525[kHz]   |
| Irr_Domain               | = Proton             |
| Irr_Freq                 | = 399.78219838[MHz]  |
| Irr_Offset               | = 5[ppm]             |
| Clipped                  | = FALSE              |
| Scans                    | = 10240              |
| Total_Scans              | = 10240              |
| Relaxation_Delay         | = 2[s]               |
| Recvr Gain               | = 50                 |
| Temp_Get                 | = 14[dC]             |
| X_90_Width               | = 8.8[us]            |
| X_Acq_Time               | = 1.03809024[s]      |
| X_Angle                  | = 30[deg]            |
| X_Atn                    | = 3.4[dB]            |
| X_Pulse                  | = 2.93333333[us]     |
| Irr_Atn_Dec              | = 23.66[dB]          |
| Irr_Atn_Dec_Calc         | = 23.66[dB]          |
| Irr_Atn_Dec_Default_Calc | = 23.66[dB]          |
| Irr_Atn_No               | = 23.66[dB]          |
| Irr_Dec_Bandwidth_Hz     | = 4.7826087[kHz]     |
| Irr_Dec_Bandwidth_Ppm    | = 11.96303566[ppm]   |
| Irr_Dec_Freq             | = 399.78219838[MHz]  |

## 色谱图和结果

### 进样信息

|          |                  |             |          |
|----------|------------------|-------------|----------|
| 进样名称:    | T1               | 运行时间 (min): | 20.00    |
| 瓶号:      | RA2              | 进样量:        | 10.00    |
| 进样类型:    | 未知               | 通道:         | UV_VIS_1 |
| 校准级别:    |                  | 波长:         | 254.0    |
| 仪器方法:    | xz1              | 带宽:         | n.a.     |
| 处理方法:    | xz1              | 稀释因子:       | 1.0000   |
| 进样日期/时间: | 2017/10/14 16:39 | 样品重量:       | 1.0000   |

### 色谱图

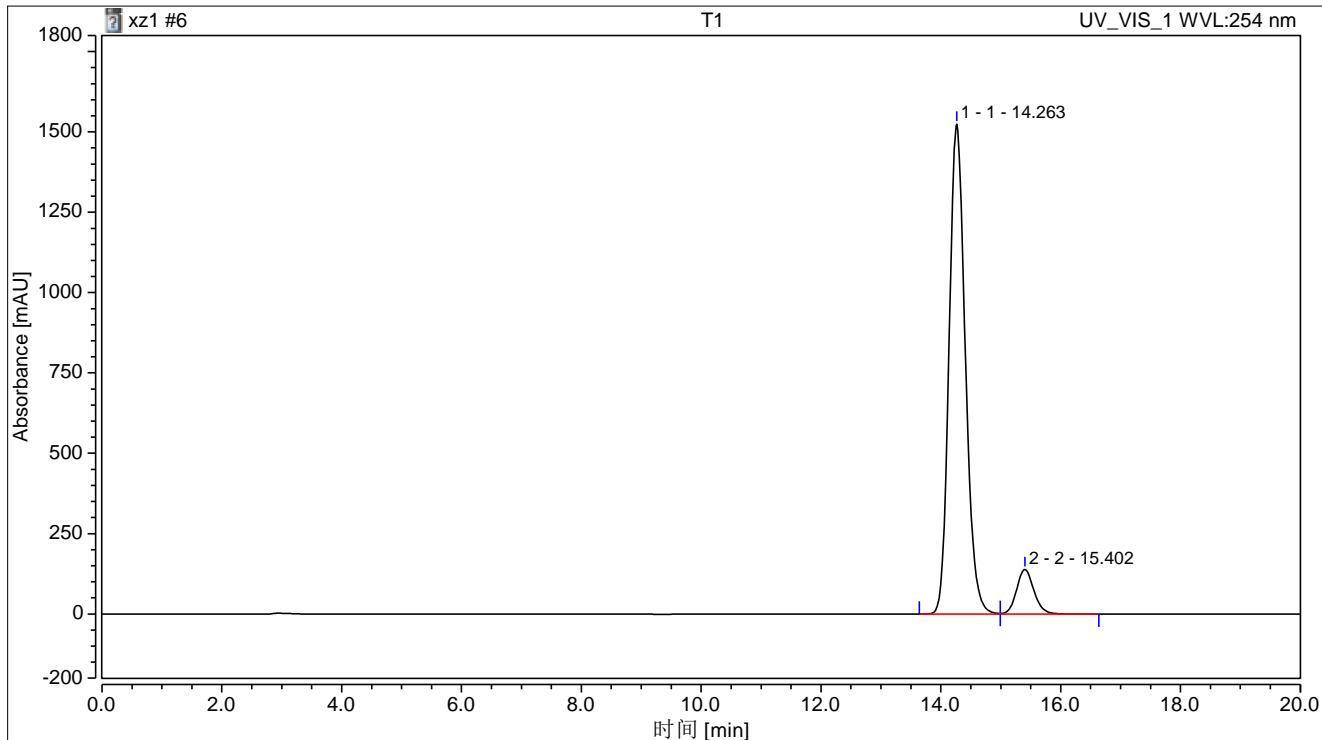

### 积分结果

| 序号         | 峰名称 | 保留时间<br>min | 峰面积<br>mAU*min | 峰高<br>mAU       | 相对峰面积<br>%    | 相对峰高<br>%     | 样品量  |
|------------|-----|-------------|----------------|-----------------|---------------|---------------|------|
| 1          | 1   | 14.263      | 478.044        | 1524.272        | 91.15         | 91.65         | n.a. |
| 2          | 2   | 15.402      | 46.435         | 138.783         | 8.85          | 8.35          | n.a. |
| <b>总和:</b> |     |             | <b>524.479</b> | <b>1663.054</b> | <b>100.00</b> | <b>100.00</b> |      |

## 色谱图和 SST 结果

### 进样信息

|          |                  |             |          |
|----------|------------------|-------------|----------|
| 进样名称:    | T1               | 运行时间 (min): | 20.00    |
| 瓶号:      | RA2              | 进样量:        | 10.00    |
| 进样类型:    | 未知               | 通道:         | UV_VIS_1 |
| 校准级别:    |                  | 波长:         | 254.0    |
| 仪器方法:    | xz1              | 带宽:         | n.a.     |
| 处理方法:    | xz1              | 稀释因子:       | 1.0000   |
| 进样日期/时间: | 2017/10/14 16:39 | 样品重量:       | 1.0000   |

### 色谱图

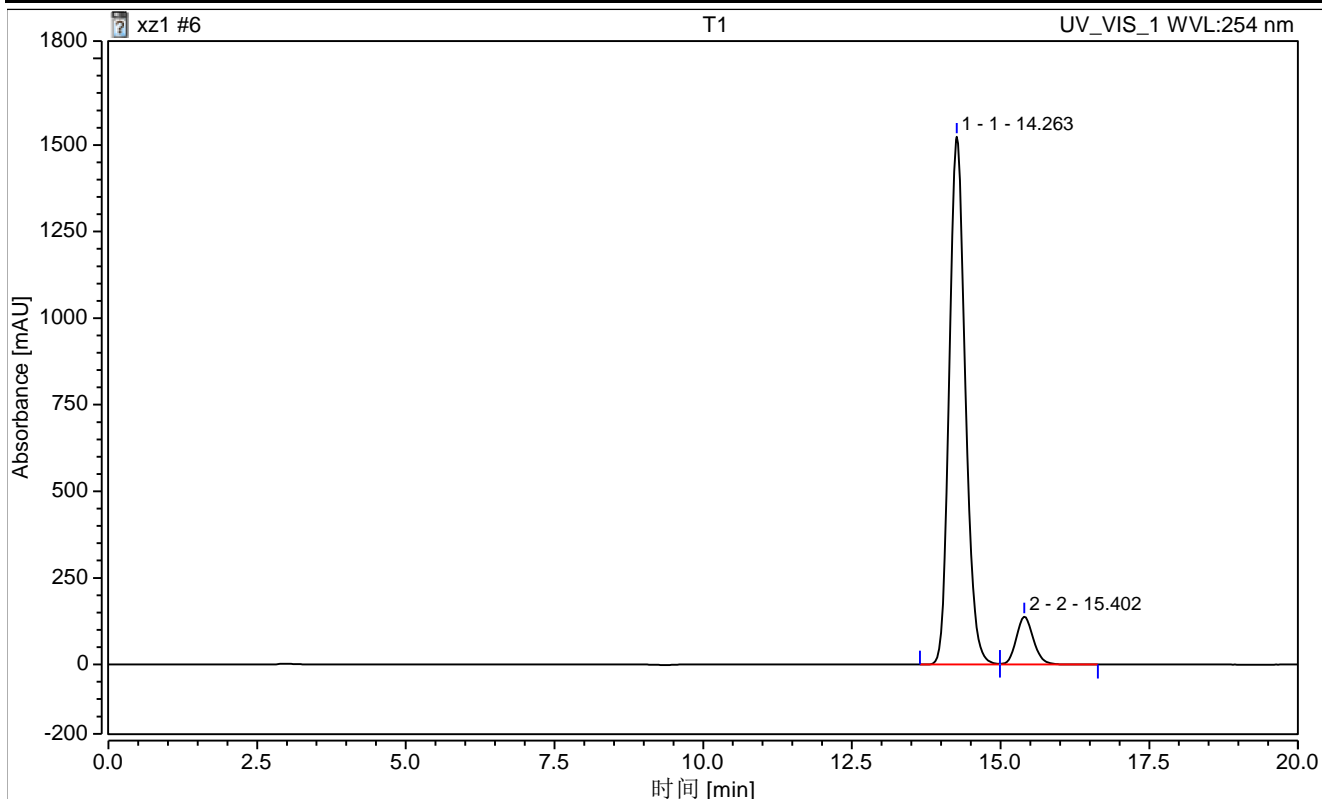

### SST 结果

| 序号               | 名称 | 进样条件 | 峰 | 测试结果 | 进样 |
|------------------|----|------|---|------|----|
| 已执行的测试用例数目: n.a. |    |      |   | 总结果: | 通过 |

## 色谱图和结果

### 进样信息

|          |                  |             |          |
|----------|------------------|-------------|----------|
| 进样名称:    | T1               | 运行时间 (min): | 20.00    |
| 瓶号:      | RA1              | 进样量:        | 10.00    |
| 进样类型:    | 未知               | 通道:         | UV_VIS_1 |
| 校准级别:    |                  | 波长:         | 254.0    |
| 仪器方法:    | xz1              | 带宽:         | n.a.     |
| 处理方法:    | xz1              | 稀释因子:       | 1.0000   |
| 进样日期/时间: | 2017/10/14 17:03 | 样品重量:       | 1.0000   |

### 色谱图

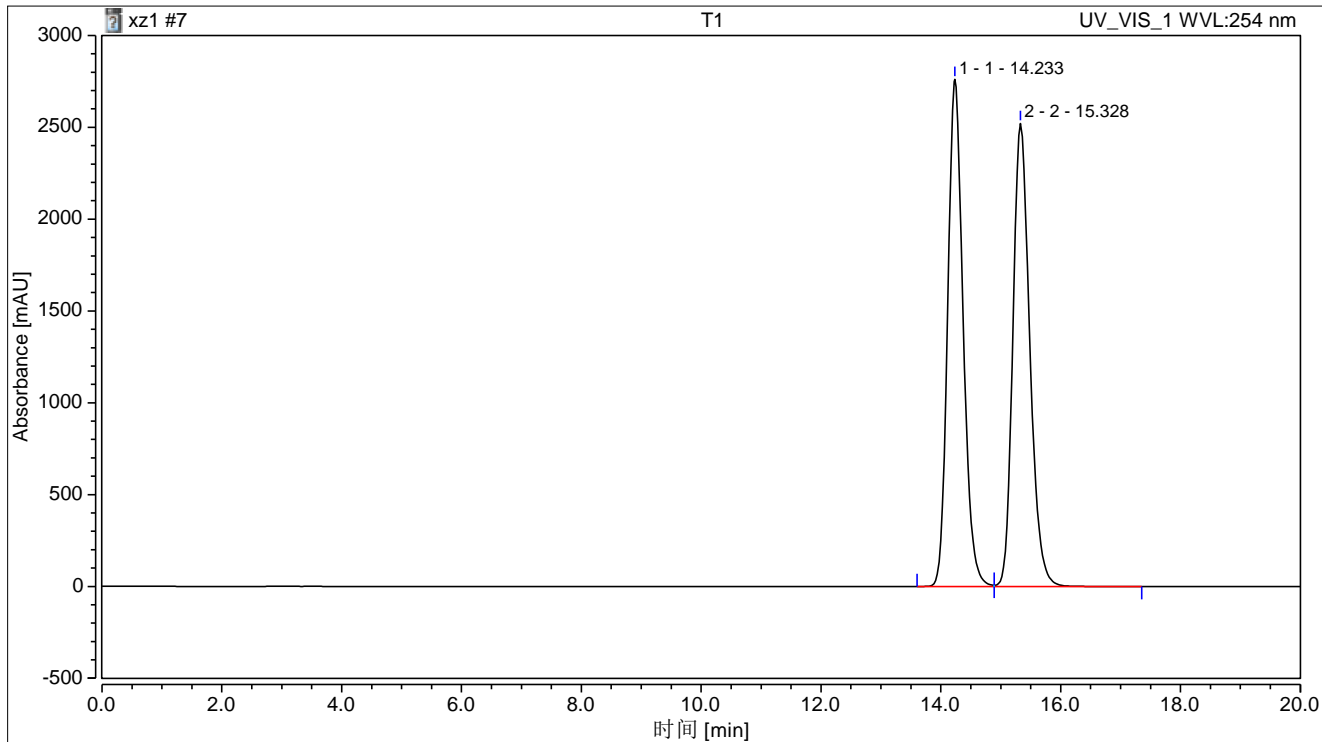

### 积分结果

| 序号         | 峰名称 | 保留时间<br>min | 峰面积<br>mAU*min  | 峰高<br>mAU       | 相对峰面积<br>%    | 相对峰高<br>%     | 样品量  |
|------------|-----|-------------|-----------------|-----------------|---------------|---------------|------|
| 1          | 1   | 14.233      | 822.481         | 2760.764        | 50.02         | 52.27         | n.a. |
| 2          | 2   | 15.328      | 821.960         | 2521.193        | 49.98         | 47.73         | n.a. |
| <b>总和:</b> |     |             | <b>1644.441</b> | <b>5281.957</b> | <b>100.00</b> | <b>100.00</b> |      |

## 色谱图和 SST 结果

### 进样信息

|          |                  |             |          |
|----------|------------------|-------------|----------|
| 进样名称:    | T1               | 运行时间 (min): | 20.00    |
| 瓶号:      | RA1              | 进样量:        | 10.00    |
| 进样类型:    | 未知               | 通道:         | UV_VIS_1 |
| 校准级别:    |                  | 波长:         | 254.0    |
| 仪器方法:    | xz1              | 带宽:         | n.a.     |
| 处理方法:    | xz1              | 稀释因子:       | 1.0000   |
| 进样日期/时间: | 2017/10/14 17:03 | 样品重量:       | 1.0000   |

### 色谱图

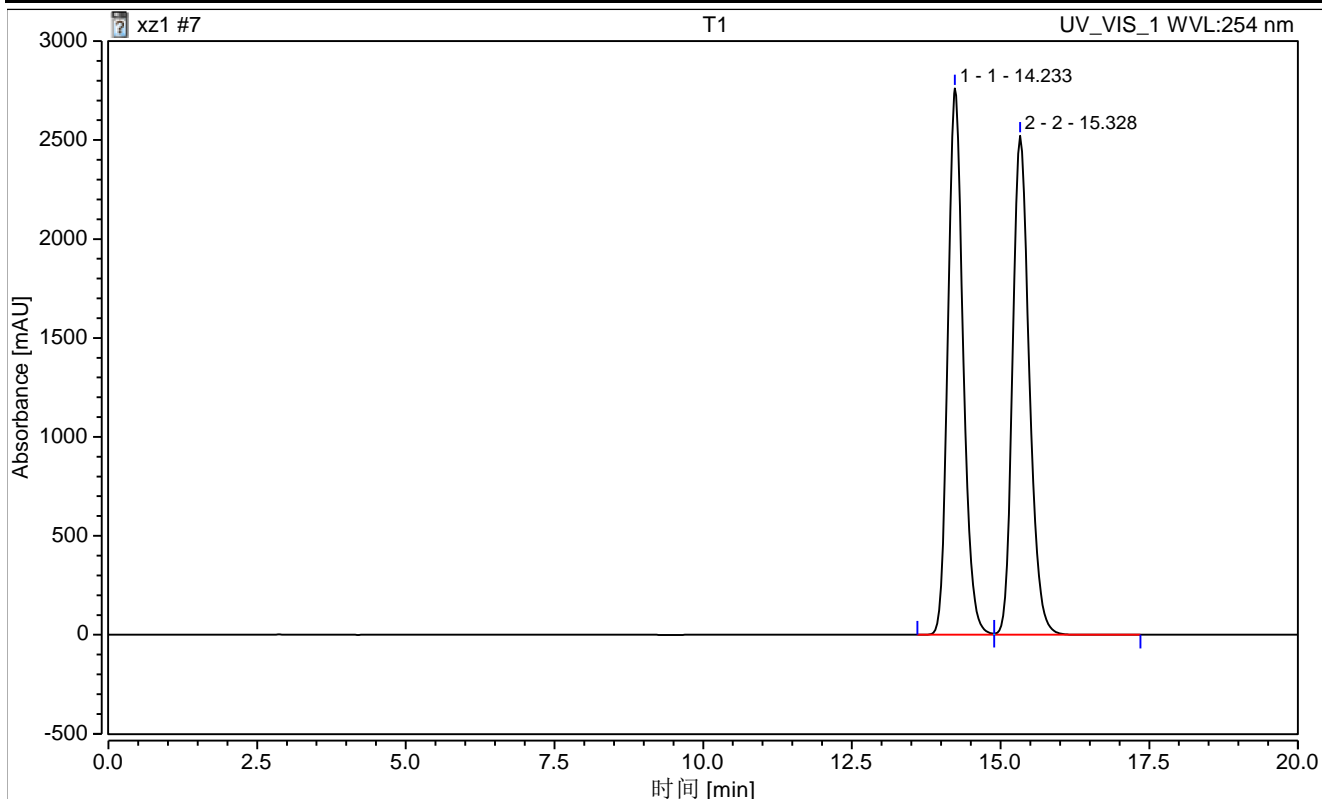

### SST 结果

| 序号               | 名称 | 进样条件 | 峰 | 测试结果 | 进样 |
|------------------|----|------|---|------|----|
| 已执行的测试用例数目: n.a. |    |      |   | 总结果: | 通过 |

## 总结

### 序列信息

|      |             |       |                            |
|------|-------------|-------|----------------------------|
| 名称:  | <b>xz1</b>  | 创建日期: | <b>2017/10/14 14:40:11</b> |
| 目录:  | <b>xz1</b>  | 创建者:  | <b>Administrator</b>       |
| 数据仓: | <b>Data</b> | 更新日期: | <b>2017/10/14 17:23:15</b> |
| 进样数: | <b>7</b>    | 更新者:  | <b>Administrator</b>       |

### 按组分

1

| 序号 | 进样名称 | 保留时间<br>min<br>UV_VIS_1 | 峰面积<br>mAU*min<br>UV_VIS_1 | 峰高<br>mAU<br>UV_VIS_1 | 样品量<br>UV_VIS_1 | 相对峰面积<br>%<br>UV_VIS_1 | 峰类型<br>UV_VIS_1 |
|----|------|-------------------------|----------------------------|-----------------------|-----------------|------------------------|-----------------|
| 1  | T1   | n.a.                    | n.a.                       | n.a.                  | n.a.            | n.a.                   | n.a.            |
| 2  | T1   | n.a.                    | n.a.                       | n.a.                  | n.a.            | n.a.                   | n.a.            |
| 3  | T1   | n.a.                    | n.a.                       | n.a.                  | n.a.            | n.a.                   | n.a.            |
| 4  | T1   | n.a.                    | n.a.                       | n.a.                  | n.a.            | n.a.                   | n.a.            |
| 5  | T1   | n.a.                    | n.a.                       | n.a.                  | n.a.            | n.a.                   | n.a.            |
| 6  | T1   | 14.263                  | 478.044                    | 1524.272              | n.a.            | 91.15                  | M               |
| 7  | T1   | 14.233                  | 822.481                    | 2760.764              | n.a.            | 50.02                  | M               |

# Display Report

## Analysis Info

Analysis Name D:\Data\du\lxz\201703112\21.d  
Method tune\_low.m  
Sample Name  
Comment

Acquisition Date 3/11/2017 8:26:26 PM

Operator XZNU  
Instrument micrOTOF-Q 134

## Acquisition Parameter

|             |          |                       |           |                  |           |
|-------------|----------|-----------------------|-----------|------------------|-----------|
| Source Type | ESI      | Ion Polarity          | Positive  | Set Nebulizer    | 0.4 Bar   |
| Focus       | Active   | Set Capillary         | 4500 V    | Set Dry Heater   | 180 °C    |
| Scan Begin  | 50 m/z   | Set End Plate Offset  | -500 V    | Set Dry Gas      | 4.0 l/min |
| Scan End    | 3000 m/z | Set Collision Cell RF | 150.0 Vpp | Set Divert Valve | Source    |

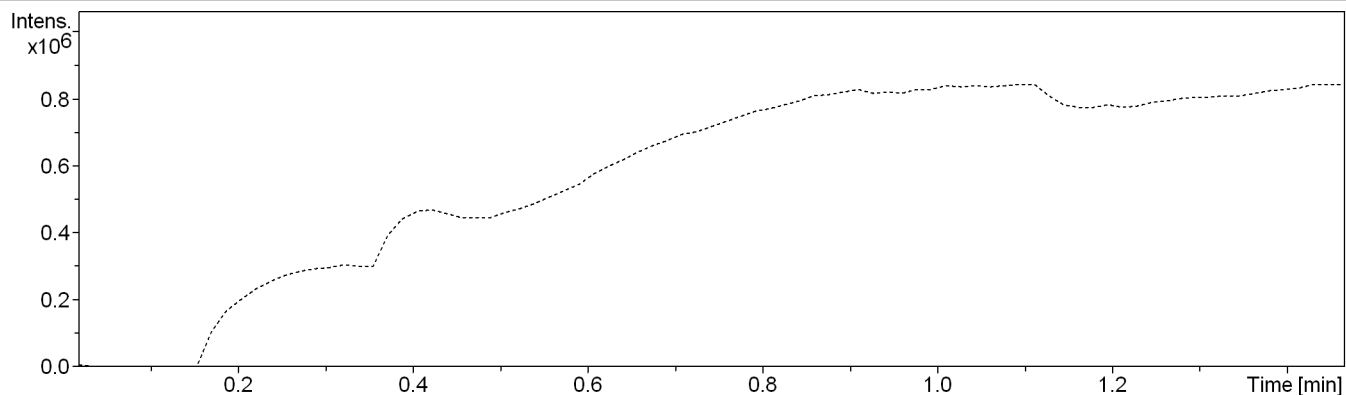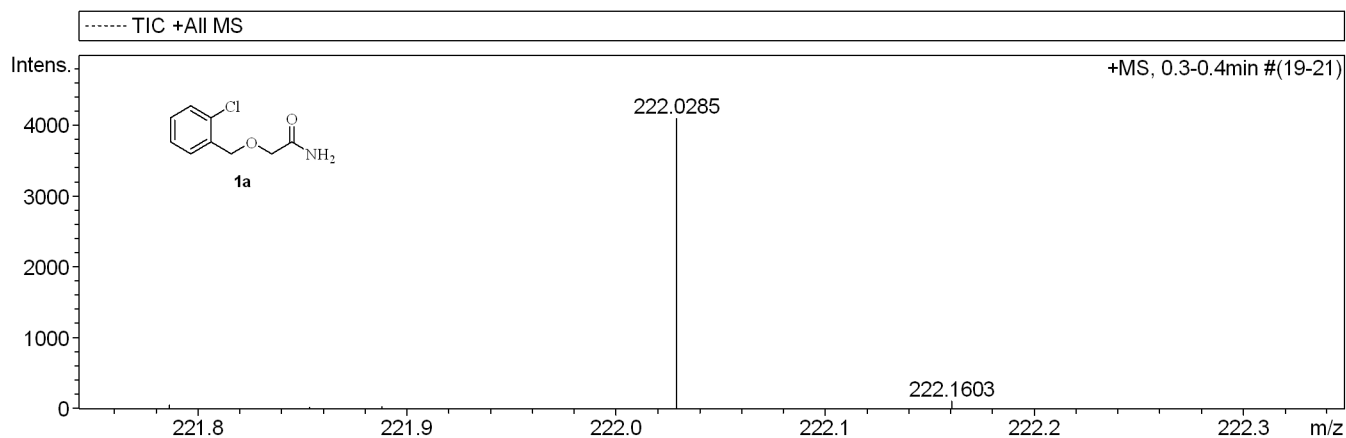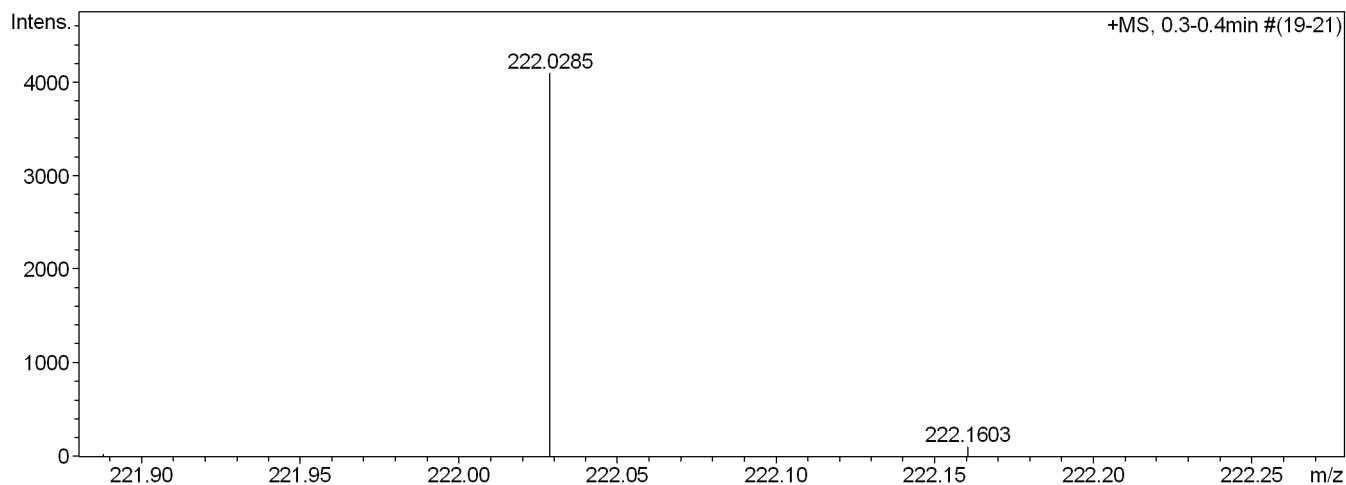

# Display Report

## Analysis Info

Analysis Name D:\Data\XZ\201710102\1j.d  
Method tune\_low.m  
Sample Name ZX-9aa  
Comment

Acquisition Date 10/11/2017 9:38:11 PM

Operator XZNU  
Instrument micrOTOF-Q 134

## Acquisition Parameter

|             |          |                       |           |                  |           |
|-------------|----------|-----------------------|-----------|------------------|-----------|
| Source Type | ESI      | Ion Polarity          | Positive  | Set Nebulizer    | 0.4 Bar   |
| Focus       | Active   | Set Capillary         | 4500 V    | Set Dry Heater   | 180 °C    |
| Scan Begin  | 50 m/z   | Set End Plate Offset  | -500 V    | Set Dry Gas      | 4.0 l/min |
| Scan End    | 3000 m/z | Set Collision Cell RF | 150.0 Vpp | Set Divert Valve | Source    |

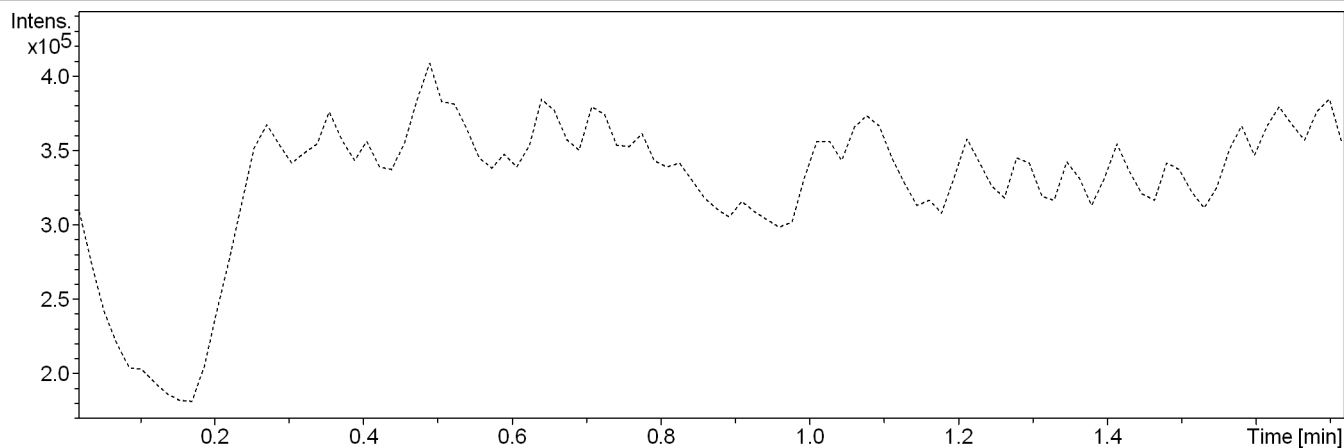

----- TIC +All MS

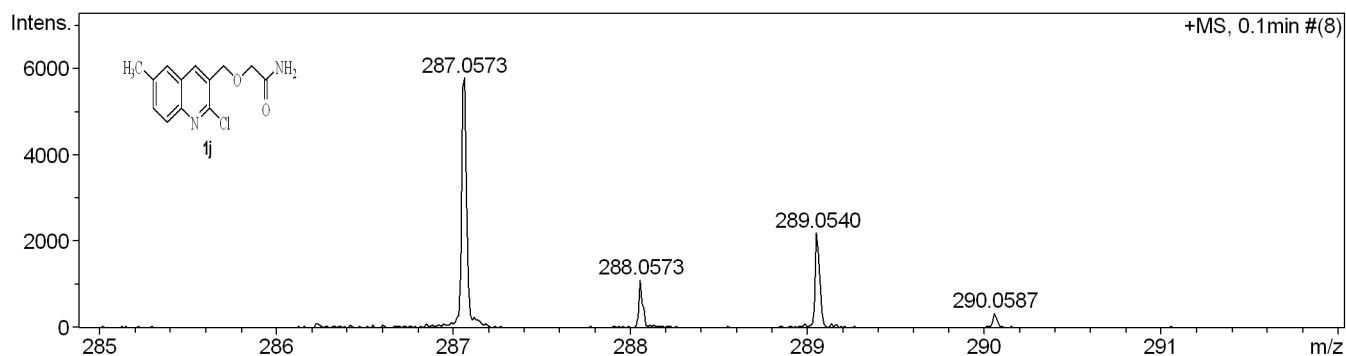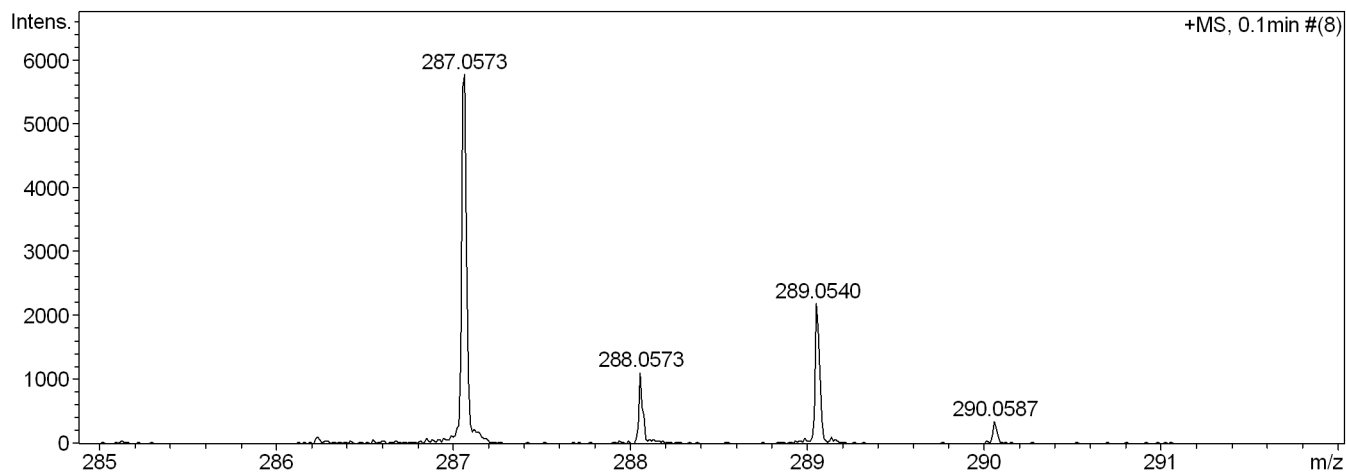



# Display Report

## Analysis Info

Analysis Name D:\Data\du\20170603XZ\10.d  
Method tune\_low\_neg.m  
Sample Name zq34b2  
Comment

Acquisition Date 6/4/2017 9:32:49 AM

Operator XZNU  
Instrument micrOTOF-Q 134

## Acquisition Parameter

|             |          |                       |           |                  |           |
|-------------|----------|-----------------------|-----------|------------------|-----------|
| Source Type | ESI      | Ion Polarity          | Negative  | Set Nebulizer    | 0.4 Bar   |
| Focus       | Active   | Set Capillary         | 3500 V    | Set Dry Heater   | 180 °C    |
| Scan Begin  | 50 m/z   | Set End Plate Offset  | -500 V    | Set Dry Gas      | 4.0 l/min |
| Scan End    | 3000 m/z | Set Collision Cell RF | 150.0 Vpp | Set Divert Valve | Source    |

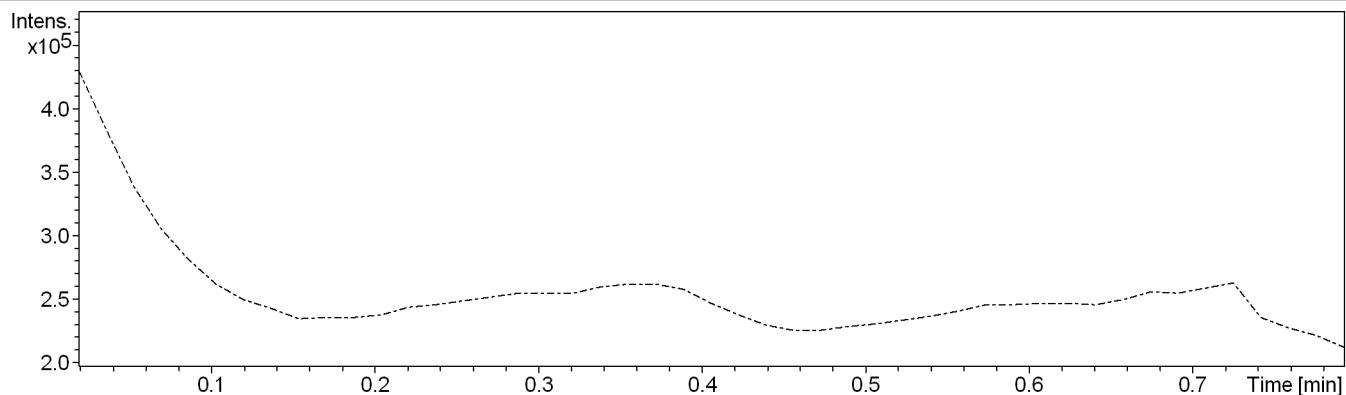

----- TIC -All MS

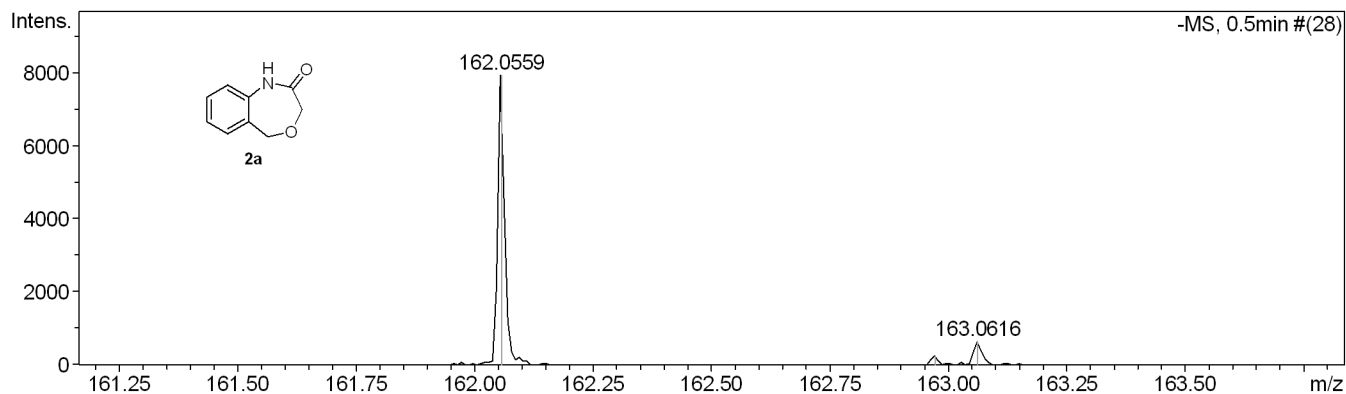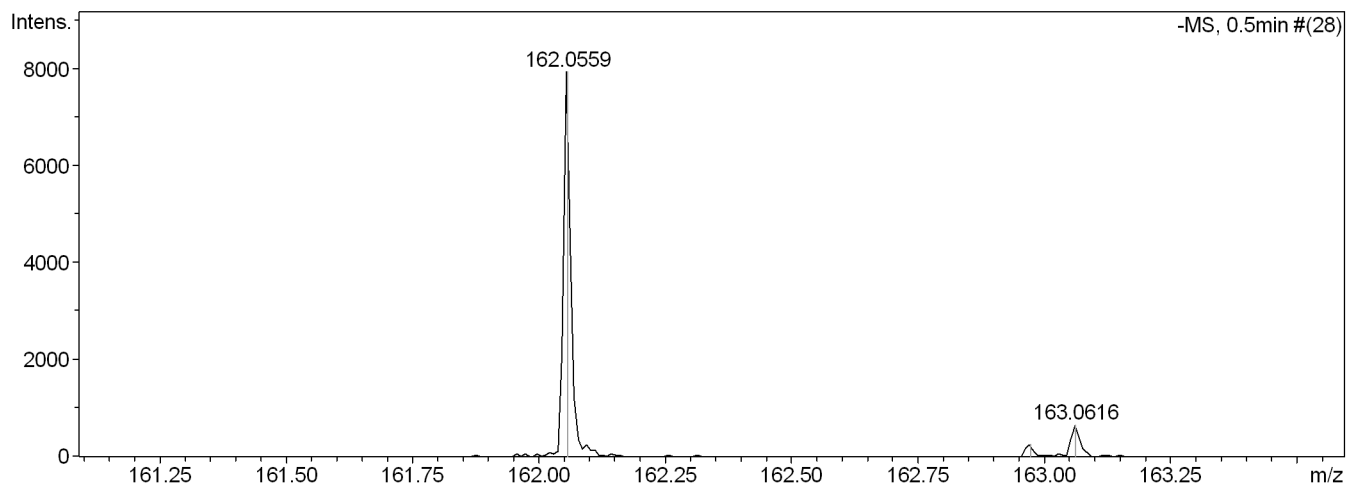

# Display Report

## Analysis Info

Analysis Name D:\Data\du\20170603XZ\8B.d  
Method tune\_low\_neg.m  
Sample Name zq34b2  
Comment

Acquisition Date 6/4/2017 9:26:34 AM

Operator XZNU  
Instrument micrOTOF-Q 134

## Acquisition Parameter

|             |          |                       |           |                  |           |
|-------------|----------|-----------------------|-----------|------------------|-----------|
| Source Type | ESI      | Ion Polarity          | Negative  | Set Nebulizer    | 0.4 Bar   |
| Focus       | Active   | Set Capillary         | 3500 V    | Set Dry Heater   | 180 °C    |
| Scan Begin  | 50 m/z   | Set End Plate Offset  | -500 V    | Set Dry Gas      | 4.0 l/min |
| Scan End    | 3000 m/z | Set Collision Cell RF | 150.0 Vpp | Set Divert Valve | Source    |

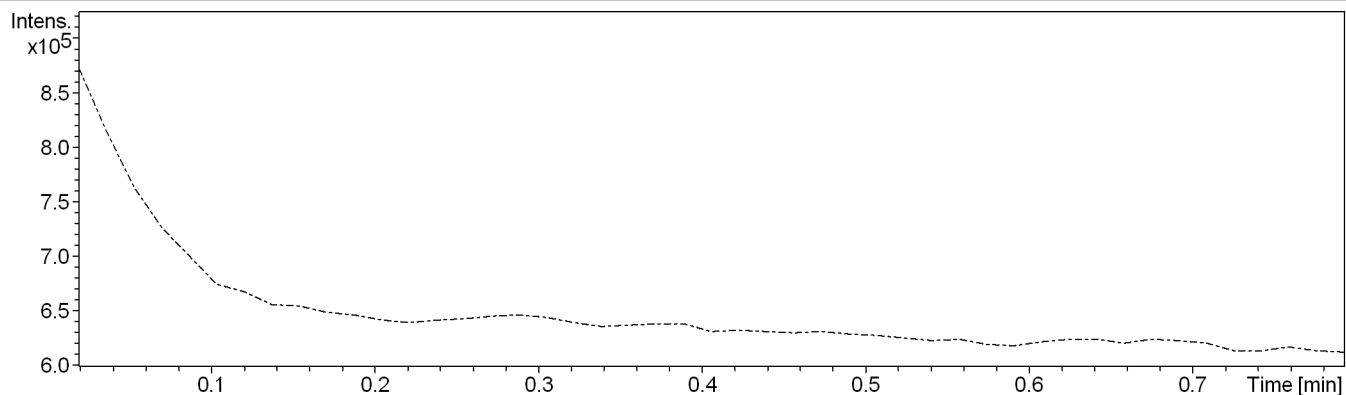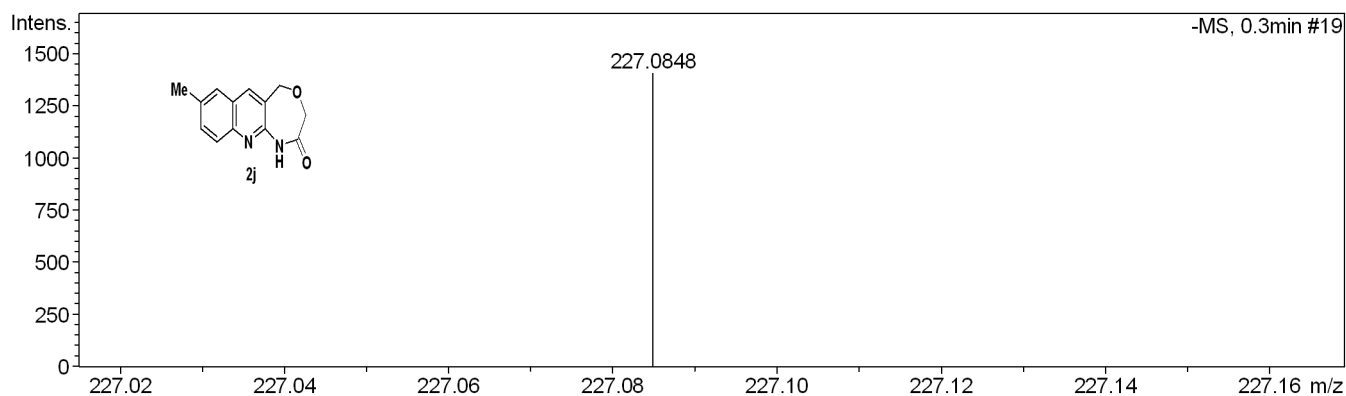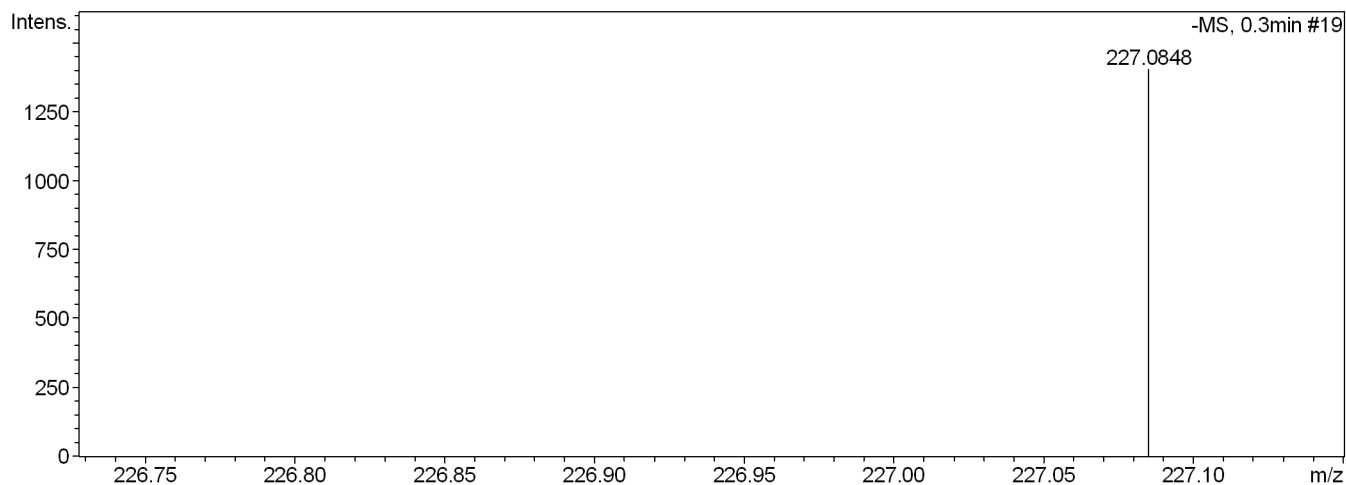

Supplement: c7ra09160e1.pdf [file c7ra09160e1.pdf]
